# Supplementary material for: KDM3B inhibitors disrupt PAX3-FOXO1 oncogenic activity in fusion positive rhabdomyosarcoma.
Source: Research Square preprint supplement (doi:10.21203/rs.3.rs-2298627/v1), 2022-11-29
Supplement: Supplementary file 1 [file 06d649665d5bfbf777c787ab.xlsx]

## Sheet: Tab1. H3K9me2 PFI90 v DMSO
Supplementary Table S5, Tab1. Differential Enrichment of H3K9me2 PFI-90 Treatment vs DMSO at Enhancers
Gene	Log 2 Fold Change
LOC105376975	6.285
ABCG1	6.225
CSNK2A3	6.126
HS6ST1	6.033
SLC22A3	5.974
LINC02237	5.934
LINC02174	5.922
GYG1	5.907
MIR1178	5.902
WNT11	5.901
LRRFIP1	5.896
CTAGE1	5.883
CDKAL1	5.878
LRCH1	5.867
NARS2	5.85
LOC100129620	5.839
IDS	5.825
MIR7977	5.818
E2F3	5.814
LOC101929563	5.814
LGI1	5.787
SDK2	5.786
TNIP1	5.77
KIAA1549	5.748
BCAT1	5.744
NAB1	5.738
DERL1	5.717
HTRA3	5.701
BNC2-AS1	5.695
SHISA9	5.671
BTBD16	5.669
RGS3	5.656
MIR575	5.651
LINC00364	5.649
NRIP1	5.632
C11orf87	5.624
LOC105378430	5.612
LINC02681	5.576
GIT2	5.519
SATB2	5.516
MIR620	5.513
CASK	5.502
MTOR-AS1	5.485
KCNIP2	5.419
LINC01605	5.418
HS3ST5	5.417
HECW2	5.412
SP3	5.407
TSHZ3	5.402
MYO18A	5.372
GPR61	5.362
TRIO	5.337
SYNM	5.336
KCNH1-IT1	5.303
TAF1B	5.282
ETV5	5.193
DRAIC	5.174
MIR887	5.163
RAP2A	5.156
EED	5.135
ABCB5	5.124
SLC16A12	5.121
ACYP2	5.109
ARL5A	5.057
LINC01091	5.045
LOC339593	5.017
LINC00159	5.008
GPC3-AS1	4.989
EVC	4.978
MIR4290HG	4.972
LOC101929295	4.966
SLC5A8	4.964
SNORD129	4.952
NEURL1-AS1	4.934
ELF1	4.91
B3GLCT	4.907
PLD5	4.898
BCR	4.867
RERGL	4.842
MIR4682	4.839
LOC339902	4.831
MIR4433B	4.815
KIF6	4.802
NRXN3	4.802
REEP1	4.788
SNCA-AS1	4.777
CCNL1	4.771
NELL2	4.764
EZR-AS1	4.758
TBX15	4.753
IL4R	4.744
PON1	4.722
LINC02423	4.716
MIR30E	4.69
SPTBN1	4.685
PI4KB	4.674
ADAMTS15	4.663
AQR	4.656
TTN	4.633
ISX-AS1	4.632
TM4SF1-AS1	4.628
LINC00841	4.612
NUP93	4.598
ZEB2-AS1	4.59
OSBP	4.581
SH3GL2	4.55
PEPD	4.533
RAP1GDS1	4.516
C17orf67	4.501
NKAIN3	4.494
CDH5	4.492
BASP1	4.463
SMARCA2	4.452
MIR7150	4.423
OR5B3	4.421
FZD7	4.411
PKD1L1	4.406
LINC00562	4.398
C10orf71	4.397
APBA1	4.386
MIR6073	4.384
ZNF184	4.375
FAM53B	4.375
GPR156	4.364
MIR548XHG	4.363
ERICH1	4.359
RPRD1B	4.357
DPYSL3	4.356
SSBP2	4.351
CDRT4	4.347
CD109	4.343
GADD45B	4.333
LINC00911	4.328
EPHA7	4.325
COX6C	4.322
MYLK4	4.321
SYPL1	4.315
RUNX2	4.314
ZBTB17	4.297
COMMD9	4.293
LINC00588	4.288
SERPINB12	4.286
MIR5011	4.283
PCAT5	4.282
APOLD1	4.282
RAD21-AS1	4.278
ADRB2	4.277
LAMC2	4.266
TMEM39B	4.251
METAP2	4.248
LOC101927391	4.243
PRF1	4.24
KCNMA1-AS3	4.238
LYPLAL1-AS1	4.237
ATRNL1	4.236
LINC00561	4.235
LOC101929901	4.233
SPP2	4.223
LIF-AS1	4.22
GNA13	4.214
MIR5681B	4.21
PBDC1	4.21
TEK	4.196
LINC00343	4.195
ARSJ	4.187
SEPTIN11	4.182
NHLH1	4.182
BCDIN3D	4.179
MIR5580	4.169
SNORD137	4.168
PLAT	4.167
MYH2	4.166
CRIM1	4.162
LOC105372068	4.154
CD82	4.149
CCND3	4.147
LINC00269	4.147
FRMD4A	4.142
LOC284930	4.137
PP2672	4.134
EPS8	4.132
MIR5589	4.132
COL9A1	4.131
LINC01987	4.131
C5-OT1	4.12
C4orf54	4.116
HINT1	4.111
UTP14A	4.101
RPE	4.099
CUZD1	4.097
SPON2	4.095
CCR7	4.095
ABLIM1	4.092
BCL9	4.091
SYT8	4.082
MC2R	4.082
SLCO4C1	4.079
FAM133CP	4.077
LINC02548	4.076
SNORA116	4.068
ENC1	4.066
ANK1	4.062
COL24A1	4.055
CALCR	4.054
CERKL	4.053
MIR4486	4.052
HDAC7	4.051
FAM135B	4.051
LOC101928748	4.051
C1orf131	4.046
OLFML2B	4.038
LOC107986163	4.033
ADORA2B	4.028
L1TD1	4.026
FHL1	4.025
MICALCL	4.022
SPINK1	4.014
SOCS1	4.012
TMEM260	4.007
RABGAP1L	4.003
MIR4290	4.002
ZNF462	4.002
LOC101927082	4.001
FAM174B	3.997
PODXL	3.987
BAAT	3.983
LINC01229	3.982
MMADHC	3.977
TFAP2E	3.974
ARL4A	3.968
LINC00958	3.965
MYOZ2	3.962
LINC01303	3.942
MAP4K4	3.937
MIR4711	3.928
LINC01739	3.925
CA12	3.924
LOC105378146	3.924
LOC100129617	3.914
FERMT2	3.912
JAM3	3.907
LOC101927640	3.903
KDM8	3.896
DUSP1	3.896
PACRG-AS2	3.894
PCED1B	3.882
VCAM1	3.881
CYYR1	3.879
MYLIP	3.876
NOL10	3.872
LINC02105	3.869
TIAF1	3.865
MIS18A	3.859
C2orf48	3.855
LOC646214	3.855
LOC91450	3.845
ZFPM2	3.844
LOC284950	3.841
PLAC9	3.839
SURF2	3.835
TRAF3IP2	3.833
MIR4668	3.832
HIST2H2BC	3.827
LINC01497	3.819
LOC100506606	3.816
ANK3	3.807
LINC02252	3.804
PCOTH	3.804
GAREM1	3.803
PRR5L	3.803
LRRC3B	3.789
SCARNA13	3.787
INSL4	3.783
C16orf82	3.775
UQCR10	3.775
LINC02801	3.771
ANKH	3.77
GNAL	3.766
ATP1A1-AS1	3.766
CAMK2B	3.756
SYNDIG1	3.754
NAV3	3.754
GNS	3.753
MGST2	3.752
TRPS1	3.729
LINC01655	3.729
CEP68	3.724
LINC02206	3.723
TAGAP	3.717
EIF2AK3-DT	3.716
LNPEP	3.715
PLAC1	3.713
SNX31	3.705
OSR1	3.694
FAM193B	3.694
PGAP1	3.693
PACRG-AS1	3.69
NTM-AS1	3.69
PTPRG-AS1	3.682
MN1	3.68
ANXA2	3.678
FABP3	3.677
FGF8	3.675
PLXNA1	3.669
TFAP2A-AS2	3.668
TMEM247	3.662
PDE10A	3.659
ASAP1-IT1	3.656
FAM107A	3.654
LOC105373764	3.652
FAM89A	3.652
SPACA6	3.649
AMPD3	3.649
ELAVL2	3.645
MIR921	3.639
C1orf105	3.637
LINC00583	3.635
PKP4-AS1	3.63
LYZL2	3.623
LOC100506497	3.618
LRRN3	3.617
TRIM25	3.617
LINC00332	3.616
LOC101927040	3.616
SLN	3.615
HS6ST2	3.612
LINC01934	3.609
WFDC3	3.599
LOC100128325	3.596
RAD23B	3.594
SLC24A4	3.59
FEZ2	3.588
LINC01831	3.585
MIR548AV	3.577
CNGA2	3.574
LOC102724927	3.571
SIGLEC11	3.57
RFX3	3.564
HLX-AS1	3.562
NEK6	3.561
DDHD1	3.561
LOC105372672	3.561
DYRK1A	3.56
GNPDA1	3.56
CARTPT	3.551
C1orf185	3.55
MIR563	3.549
ADAMTS5	3.544
RMC1	3.544
MTUS2	3.54
PLGRKT	3.538
TGOLN2	3.536
FHL2	3.535
DKFZp451B082	3.535
MAPRE2	3.527
CPS1-IT1	3.526
GABRG1	3.524
MIR532	3.516
FZD1	3.515
LINC00922	3.512
EXT1	3.509
LAMA4	3.506
PALM2-AKAP2	3.501
LINC02093	3.501
RASEF	3.494
ITIH5	3.493
PUM2	3.492
LINC02012	3.484
CTNNA3	3.483
NAALADL2-AS3	3.482
LOC100128079	3.48
PIK3C2G	3.478
ATP13A5	3.476
PAX8	3.474
OST4	3.467
BST1	3.459
NCK2	3.457
MIR190A	3.457
ABCA12	3.448
HECTD2	3.447
LINC00548	3.445
TCEAL9	3.444
GADD45A	3.442
TMEM72-AS1	3.438
CYP2J2	3.435
ADAMTS17	3.433
AKAP12	3.432
LINC02399	3.426
PCDH19	3.426
C8orf87	3.423
WDR11	3.42
MIR577	3.417
C6orf118	3.415
LINC02214	3.414
KYAT3	3.413
MIR3977	3.407
MIR4643	3.404
PLPP1	3.404
TFAP2B	3.404
SYNJ2	3.4
TRHDE-AS1	3.4
PATL1	3.4
TNNI1	3.4
VAV3-AS1	3.397
LINC02521	3.396
TCF7L2	3.394
CDH7	3.39
NAT10	3.389
KDM3B	3.389
AKAP6	3.389
MIR615	3.386
MIR7854	3.386
LOC100996664	3.384
CDK5RAP2	3.383
DPYSL2	3.381
GALNT10	3.38
LOC100507156	3.38
LOC105369212	3.378
RELN	3.374
HS1BP3	3.373
SLC9A6	3.371
RNU6-7	3.364
B3GNT5	3.364
PKHD1	3.362
SDK1	3.36
MAP4K3-DT	3.357
CNTNAP5	3.353
LINC01349	3.351
KANK1	3.347
SNTB1	3.347
RYR3	3.34
LIPC-AS1	3.339
EPHA4	3.339
TMEM44-AS1	3.338
KLHL26	3.331
FXYD6-FXYD2	3.329
C1orf195	3.326
CDH6	3.324
PKDCC	3.32
FGF7	3.318
MIR1260B	3.315
FGFBP3	3.312
SNORD130	3.311
SLC46A3	3.308
CPED1	3.307
COL14A1	3.306
PCDHGC5	3.303
LOC730338	3.303
SACS	3.295
PRKACA	3.293
CT45A7	3.291
OR10P1	3.291
ARSB	3.289
SLC6A1	3.289
UACA	3.288
BMF	3.287
SMURF2	3.287
TSPAN9	3.286
SYNE1-AS1	3.285
LINC01711	3.281
LOC100128988	3.281
PARP6	3.279
TEAD1	3.279
EYA4	3.278
DAB1	3.278
EXOSC9	3.277
LINC01214	3.275
STN1	3.272
LOC101926944	3.272
DIAPH3-AS1	3.271
JARID2	3.266
RBFOX2	3.26
STMND1	3.258
KCNC1	3.257
FBXO15	3.253
SUCLG2	3.252
LOC101928535	3.251
DUSP10	3.248
PRRT1B	3.248
DDX41	3.247
C21orf62	3.246
DCP2	3.246
HEXB	3.245
LINC02015	3.242
ADD1	3.239
LINC02238	3.236
TRIM32	3.234
LINC01697	3.233
FLNB	3.232
MIR4263	3.23
CDK6	3.23
CBLN4	3.227
ACTBL2	3.224
ODC1-DT	3.22
FOXP1	3.218
LOC100506474	3.218
IER5	3.216
SIAH3	3.215
FREM2-AS1	3.214
PTENP1	3.212
SNTG1	3.211
YPEL1	3.21
LZTS1	3.208
RORA-AS2	3.205
NLGN1	3.204
PREX1	3.201
KRT80	3.201
P2RY1	3.197
PRTG	3.194
LOC101929064	3.192
PGAM1P5	3.191
HTATIP2	3.19
MIR548AP	3.187
BNIP3L	3.184
PIK3R3	3.183
LOC105374313	3.182
PRLHR	3.18
PCGF5	3.18
NFATC1	3.175
DCUN1D4	3.174
LINC02510	3.173
CEP85L	3.168
JMJD1C	3.167
LOC101927417	3.165
TGFBR1	3.165
LINC01312	3.157
REPS1	3.155
ADI1	3.155
TSPAN5	3.154
PRICKLE2-AS3	3.152
JCAD	3.152
KLF7	3.15
TRAF6	3.15
DISC1-IT1	3.147
ANTXR2	3.147
TMEM64	3.146
TSG1	3.145
LINC01279	3.144
LOC101927245	3.144
BCL11A	3.14
ARHGEF7	3.138
HOXB13	3.138
LINC01985	3.138
MIR5197	3.136
LINC01936	3.136
NTN4	3.133
MALAT1	3.132
MYCL	3.131
PRELID3B	3.126
IFT43	3.125
CLDN5	3.124
TBX3	3.121
LINC02497	3.118
AKAP13	3.117
SNORD103C	3.115
LOC105377621	3.114
EBF3	3.104
GSN	3.099
MPC1	3.098
FBLN2	3.097
SCMH1	3.096
LINC01448	3.096
LIMCH1	3.095
LINC02010	3.094
LINC01876	3.092
STMN1	3.091
SPACA1	3.088
LOC101927855	3.081
LINC01119	3.079
LINC01124	3.078
MIR6071	3.078
PDLIM3	3.076
AFAP1L1	3.075
RIMS4	3.075
ATP8A2	3.074
GRIK1-AS2	3.071
LOC101929161	3.071
MTHFD1L	3.07
TBC1D5	3.067
YWHAQ	3.066
PROC	3.066
CAMKMT	3.066
SOX5	3.065
MET	3.064
ATP1A4	3.063
LINC02763	3.063
LINC02466	3.062
SCN1A	3.059
SMURF1	3.059
TMEM181	3.055
NXPH1	3.054
PHACTR2	3.053
USP39	3.05
CHMP3	3.049
TRMT5	3.047
NCRUPAR	3.042
MIR4778	3.041
SPTSSA	3.04
GUCY1A2	3.031
PNMA8A	3.03
HMHB1	3.028
DICER1	3.026
CSNKA2IP	3.025
IGF2R	3.025
ALDH1A3	3.024
LINC00578	3.021
LINC02405	3.018
EPHA8	3.014
UTP25	3.013
TRABD2B	3.013
MIR3135A	3.007
MIR499B	3.004
HTRA4	3
LOC105370586	3
CAV1	2.998
MIR378H	2.998
SHROOM3	2.998
LOC102723427	2.996
FGF13	2.994
DYSF	2.992
DNM3-IT1	2.99
LINC02205	2.985
LINC02478	2.984
CRPPA	2.984
KRT86	2.984
TSPOAP1-AS1	2.981
MUSK	2.981
MIR1200	2.98
GPBP1	2.978
NAV2-AS2	2.977
TMEM178A	2.977
LOC101927055	2.976
LINC00887	2.976
SELENOP	2.975
PKNOX2	2.975
RHOB	2.972
RFC1	2.972
TPBG	2.97
MIR8066	2.97
DDX39A	2.968
IFI44	2.966
LOC101927310	2.964
SLC22A16	2.963
MYRFL	2.961
TMCC3	2.961
LINC01816	2.959
LINC01602	2.958
TFDP2	2.957
CENPO	2.955
LINC01151	2.955
KIF5B	2.955
ZCCHC8	2.955
LINC02393	2.954
RAD18	2.953
CCDC192	2.953
LNCOG	2.95
SELENON	2.95
S100A16	2.95
NAV2	2.947
REXO1L2P	2.945
LRFN5	2.944
MIR4744	2.938
CPB1	2.938
CDK17	2.933
LINC01817	2.932
KLF14	2.929
LOC105377716	2.927
LOC101929577	2.921
LINC01578	2.92
LINC00297	2.92
CASC15	2.918
KPNA2	2.918
PPM1H	2.916
NAALADL2	2.916
RANBP6	2.915
BORCS5	2.913
MAF	2.911
MIR6817	2.908
TMEM131L	2.901
LINC01714	2.898
EML4	2.895
SNORA50C	2.89
ZNF227	2.886
ARMCX2	2.885
GGTLC1	2.884
ZNF704	2.881
PSD3	2.881
GMPR	2.88
CCDC26	2.877
OLFML3	2.876
TSPAN3	2.876
SLC12A2	2.874
LINC01583	2.874
KCNIP1	2.87
LINC00656	2.87
ECT2	2.868
INSM1	2.865
PCLO	2.863
NDST1	2.86
IL15	2.859
TCTEX1D1	2.858
ITGA4	2.857
FRAS1	2.854
VAPA	2.854
EXTL3	2.854
GPR182	2.849
MIR1208	2.847
TNFAIP3	2.839
SEMA3D	2.839
SNX9	2.837
FGFR1	2.832
ERG28	2.831
IGFBP7	2.83
EIF2AK2	2.83
SHISA2	2.829
THEG5	2.829
LINC01393	2.826
EYA1	2.822
LINC02073	2.821
CNIH3	2.821
LOC643542	2.819
KLF5	2.819
SNORD166	2.818
EYA2	2.817
LINC00894	2.816
HEYL	2.813
CASP7	2.813
SRP14-AS1	2.813
CHD7	2.811
BCL10	2.81
LDLRAD3	2.807
LINC01815	2.805
KIAA2012-AS1	2.804
MAD1L1	2.803
UNQ6494	2.801
IQSEC1	2.8
RPSAP9	2.797
LOC101928622	2.796
C1QTNF7	2.792
KRT78	2.792
ACKR3	2.791
MIR3668	2.791
CSPG5	2.79
LOC101927575	2.789
PSG10P	2.787
LINC01248	2.786
HMGCS2	2.785
NRN1	2.785
NPTN	2.784
SRPK2	2.782
HS6ST2-AS1	2.772
LINC02443	2.771
CYP1B1-AS1	2.77
KIAA1324L	2.769
GLI3	2.769
TET3	2.768
ZFP36L1	2.768
LOC100506725	2.766
MEF2A	2.765
LINC01614	2.764
RTL5	2.758
CRTC3	2.756
KLF9	2.754
RTL8B	2.752
LINC01747	2.745
ARHGAP25	2.743
NRG1	2.743
SAMD5	2.742
DOCK2	2.739
LOC101929380	2.738
BCL2	2.735
EWSAT1	2.735
FRGCA	2.734
LINC02533	2.734
MIR1268A	2.729
FGF1	2.722
MAMDC2-AS1	2.722
GAS1	2.722
FCHSD2	2.72
COX4I2	2.718
SPEG	2.717
SPATA31D5P	2.714
LINC00972	2.713
LINC02008	2.712
MAP10	2.71
CNP	2.709
LINC01353	2.708
LINC01370	2.706
FREM1	2.706
HABP2	2.704
INSYN2A	2.704
MAGI1-AS1	2.703
NRF1	2.7
ZNF621	2.699
MIR3923	2.699
WWC2-AS1	2.695
LINC00392	2.692
UNC5C	2.687
ARL14EP	2.685
LINC01712	2.684
AGR3	2.682
LINC01683	2.68
MIR548AU	2.677
LINC01819	2.676
GSX1	2.676
ASPHD2	2.674
CXCL3	2.673
LINC01209	2.67
PDE1C	2.668
TFPI	2.667
WWTR1	2.665
FAM110B	2.665
ARMCX5-GPRASP2	2.663
PTPRR	2.662
SMIM20	2.661
LINC00540	2.66
PPP2R3A	2.657
TMEM100	2.656
LINC02612	2.649
ADAM19	2.648
ST3GAL5-AS1	2.648
CDH26	2.647
LOC101928523	2.644
LINC01568	2.643
RLN1	2.642
LINC01127	2.64
IGDCC4	2.64
CT55	2.638
ESM1	2.638
CHSY3	2.636
LIPC	2.635
LOC102724804	2.634
RXFP2	2.629
HTR2A	2.627
MAP2K5	2.626
EPC2	2.625
C9orf135	2.624
MIR544B	2.622
AMIGO2	2.621
LINC01235	2.619
HFM1	2.616
OARD1	2.612
PDZRN3	2.611
COX10	2.609
MIR4451	2.609
MIR584	2.607
KREMEN1	2.604
CDCA7	2.601
C15orf54	2.601
OR6V1	2.601
IFNG	2.599
JAZF1	2.598
MOGAT1	2.595
MTCL1	2.594
TNS1	2.592
GEM	2.591
ISM1-AS1	2.59
VSTM2L	2.589
STEAP3	2.588
MAP3K4	2.587
MIR548T	2.587
KCND3-AS1	2.586
ARHGAP31	2.585
ALCAM	2.579
ANO10	2.579
NGF	2.579
LOC101927623	2.577
EPAS1	2.571
FLT1	2.571
SALRNA3	2.57
C1orf116	2.57
LINC01246	2.569
LINC00545	2.569
FBN1	2.568
NTM	2.564
C7orf69	2.562
MIR4718	2.561
MIR634	2.56
SKI	2.56
TRIM3	2.56
PARP1	2.557
ZNF644	2.555
NFIA	2.552
TLE1	2.55
CLSTN2-AS1	2.549
BRD7P3	2.549
MIR3914-1	2.546
LINC02322	2.545
CEP57L1	2.544
MIR760	2.542
MIR6888	2.538
LINC01903	2.531
SUCLG1	2.529
CDRT15P1	2.529
LINC01510	2.521
MIR12131	2.52
LINC01846	2.519
ABL1	2.519
OGDH	2.519
MAMDC2	2.518
WASF3	2.513
CCDC3	2.511
ARHGAP18	2.51
SEPTIN4	2.502
SYN2	2.501
ZADH2	2.498
LINC00696	2.498
LINC02712	2.498
NR2E3	2.495
CCNI	2.494
LOC105374972	2.491
ANKRD30A	2.49
ARID1B	2.489
RFK	2.487
B3GALT5	2.485
COL4A1	2.484
SIX3-AS1	2.478
NMRAL2P	2.477
PABPC1P2	2.474
TSC1	2.474
APCDD1L	2.474
CST3	2.472
TFG	2.471
CCKAR	2.467
CPLX2	2.466
SNORD145	2.463
ANKRD1	2.462
LINC00487	2.461
LINC02003	2.461
RNF217	2.458
LNX2	2.457
MMD	2.456
LOC101928807	2.456
LOC101927342	2.454
TSHZ1	2.453
NTMT1	2.449
SDC2	2.448
MIR4272	2.447
LOC101927539	2.447
LNP1	2.447
PTPRD	2.446
MFAP4	2.441
LAMA3	2.439
CBLB	2.437
LINC00499	2.437
AHDC1	2.433
LINC00445	2.433
LOC729296	2.432
LINC01740	2.431
TCF12	2.431
MIR6762	2.43
TTC3	2.429
MIR3170	2.429
KCNB1	2.428
SH3BP4	2.427
PRICKLE2	2.426
SSX2IP	2.422
TGFB2-OT1	2.422
PIP4K2A	2.421
GHSR	2.421
LINC02036	2.421
LINGO1	2.419
LINC02421	2.419
LOC107986453	2.417
C1orf143	2.416
MIR137HG	2.412
LOC101927237	2.41
FAM228B	2.409
LINC02215	2.407
MEP1B	2.407
PTPRE	2.407
PEX14	2.405
IRS1	2.4
ASB4	2.399
LMO1	2.398
HMGA2-AS1	2.398
NXNL2	2.397
NFKB2	2.396
LINC01638	2.395
LINC02472	2.394
NAV1	2.387
ZBTB18	2.387
LOC101927374	2.387
GMNC	2.387
TAS1R2	2.384
DCX	2.384
ADAMTS9	2.382
EIF3IP1	2.381
AKNAD1	2.381
MSI2	2.378
ESR1	2.377
DYNLRB1	2.377
MCUB	2.376
FUT10	2.375
LOC101929470	2.375
LINC01812	2.373
EPHB1	2.372
RASGRF1	2.371
INHBA	2.37
ANKRD28	2.367
ETV1	2.358
LINC02227	2.356
LINC01750	2.355
LOC101929268	2.354
GRIN2A	2.352
FGF2	2.352
LINC01774	2.351
C17orf112	2.348
EMC1-AS1	2.347
SPAG17	2.346
SLC34A2	2.346
MIR466	2.344
TNNT1	2.344
CXCL2	2.343
LINC02513	2.341
LOC105370457	2.341
PACSIN2	2.34
AGK	2.339
ZNF334	2.338
GLS	2.338
SCARNA18	2.338
SPATS2L	2.334
RFLNA	2.334
CABLES1	2.334
LINC01413	2.332
MYOG	2.332
LINC02450	2.331
RUNX1-IT1	2.326
KLRA1P	2.324
C2orf16	2.322
CPM	2.321
KCNK13	2.319
EGLN3	2.318
ERBB4	2.315
JUN	2.31
RTKN	2.31
TINAGL1	2.305
OPALIN	2.304
FGF16	2.303
AXIN2	2.302
BVES-AS1	2.302
LINC02188	2.302
LOC105377342	2.301
LINC01377	2.301
OTX2	2.299
POLR1A	2.297
LINC02207	2.297
C12orf66	2.296
PRRC1	2.296
MIR181A1	2.296
KANK4	2.295
TRIM55	2.295
CDK1	2.292
NRK	2.289
CITED1	2.289
CASQ2	2.288
FAM184A	2.287
LOC613266	2.282
LOC101928909	2.279
STPG4	2.279
LINC01335	2.278
LINC02764	2.278
CHRNA1	2.277
LOC101929528	2.275
LOC100499489	2.273
TRIM45	2.272
EDN3	2.272
LOC285000	2.271
NSMAF	2.269
NOL4	2.269
MIR3913-2	2.268
ANTXR1	2.266
PDZK1	2.265
LINC01601	2.264
LOC101928847	2.261
LY96	2.258
CDC42EP3	2.256
NEDD4	2.255
ERCC4	2.255
MIR378G	2.255
SNORA3B	2.254
CAMTA1	2.253
CNTN6	2.252
DKK3	2.252
CYP39A1	2.25
MARCKS	2.249
CCDC179	2.244
MIR1343	2.244
NCALD	2.242
ADAT2	2.242
LAMC1-AS1	2.24
ZNF280B	2.237
NODAL	2.237
TBC1D1	2.235
MIR6085	2.235
ZNF385D-AS2	2.235
LOC101929279	2.234
ACTL7B	2.233
TRPC4	2.233
FCRLB	2.231
DNAH5	2.227
TMEM241	2.226
PTPN1	2.226
RNF24	2.22
DTX4	2.218
REG4	2.218
RTN4	2.218
C12orf76	2.214
MIR4295	2.214
KLHL14	2.212
LINC01484	2.21
WIPF3	2.208
THSD7A	2.208
ANXA3	2.203
C1orf141	2.202
DNAJB9	2.202
CHI3L1	2.202
LOC100422212	2.2
GTF2H5	2.195
HERC3	2.195
MIR548U	2.195
LINC00598	2.193
VPS37B	2.192
UBE3D	2.189
ZBTB2	2.187
TMEM43	2.186
ITGB8	2.185
GPR139	2.185
LRP1B	2.184
NT5DC3	2.181
SPATA6	2.178
LOC101927908	2.175
LINC02439	2.174
SEMA6A-AS2	2.173
IL12A	2.168
LOC105370489	2.167
TULP4	2.167
TAFA2	2.166
SEPSECS-AS1	2.165
ARHGEF3	2.165
MIR145	2.162
MIR4633	2.161
SPRY1	2.161
STRIP2	2.16
GAS2	2.16
PCSK2	2.158
FAM81A	2.157
MIR6081	2.156
LMCD1-AS1	2.151
VWA5B1	2.151
MEX3B	2.15
C8orf88	2.147
LOC105373759	2.147
MIR3125	2.147
HAAO	2.14
PMS1	2.137
LINC01800	2.137
LRFN2	2.135
CTLA4	2.135
TECRL	2.131
SLC35F3	2.13
MIR1262	2.127
RXRG	2.127
KCNMA1-AS2	2.127
PDCD5	2.126
MIR6506	2.123
LOC100506869	2.122
MIR2053	2.121
ATP1A1	2.121
STC1	2.121
USP46	2.12
MKX-AS1	2.117
RGMB	2.115
CCDC140	2.113
LGALSL	2.107
LINC02028	2.105
LOC100128531	2.105
LINC01446	2.103
TXNIP	2.101
ING3	2.1
FANK1-AS1	2.1
C14orf177	2.098
SNORD12	2.094
SHB	2.093
LOC105374205	2.093
ARMH4	2.089
GIPC2	2.088
CCDC148-AS1	2.085
LINC00473	2.085
FRMD4B	2.084
LINC01479	2.082
LINC01894	2.08
DEC1	2.077
GNA14	2.074
LOC100505795	2.074
LOC102724555	2.072
LINC02067	2.071
LOC100996654	2.07
ATXN7L1	2.07
TEX51	2.066
CYP24A1	2.065
LOC102724050	2.064
LOC101927168	2.064
WNT10A	2.062
RBM20	2.058
MIR8081	2.058
KL	2.058
SLMO2-ATP5E	2.057
TIMP3	2.057
LINC01625	2.056
IATPR	2.056
LRRN2	2.053
PTK2	2.05
LOC646736	2.049
ASIC2	2.048
TGIF1	2.047
ABHD10	2.046
ZNF638	2.045
MGC12916	2.043
TMEM189	2.043
TMSB10	2.041
KIF16B	2.039
LUZP6	2.039
GBE1	2.036
FCN2	2.029
PDCD4-AS1	2.026
SYNE3	2.023
MRPL44	2.021
NFIA-AS1	2.018
MYBPH	2.013
MIR205HG	2.012
LOC729681	2.01
MIR4319	2.009
MIR4505	2.007
LOC100507065	2.007
LOC102723824	2.002
CEMIP2	2.002
NAMA	2.002
ADORA2A	2.001
KRTAP2-4	2.001
RAB8B	1.999
BEST3	1.997
LOC102724612	1.996
KDR	1.995
PDE7B	1.99
RPL22L1	1.988
NKX2-5	1.988
ARHGAP17	1.986
PLEKHA5	1.984
LOC440982	1.982
ETS1	1.982
MYMX	1.981
LINC01798	1.979
AKT3	1.975
ADGRL4	1.974
POSTN	1.974
B3GALT1	1.973
MYBPHL	1.973
SLC25A48-AS1	1.973
MIR3681	1.972
CMYA5	1.968
LINC01951	1.967
ADRA1D	1.966
MIR548AB	1.966
LOC100507548	1.965
SERP2	1.964
LNPK	1.963
LOC101928510	1.963
NUAK1	1.963
RALYL	1.963
ADAM17	1.962
HLF	1.961
FAM155B	1.961
MIRLET7I	1.959
LRRC75A	1.957
ATP5PF	1.952
DAGLB	1.948
PTPRB	1.948
RBMS1	1.945
PAG1	1.944
KIF2B	1.938
LINC01445	1.937
LINC01121	1.937
LLPH	1.929
MICAL3	1.928
LBH	1.928
SAMMSON	1.928
LINC01500	1.925
LOC644762	1.924
TRPA1	1.924
DMRT2	1.923
FAM200B	1.921
COL25A1	1.919
LOC100505774	1.918
MIR4642	1.915
LOC101928119	1.912
GALNT14	1.912
LNX1-AS1	1.911
SLC9A9-AS1	1.91
LRCH3	1.907
MIR1973	1.906
RSPH1	1.905
LMBRD1	1.905
MIR3616	1.905
AUTS2	1.904
HMCN2	1.904
BMP10	1.902
TRIM9	1.901
CLINT1	1.901
MACF1	1.901
CCDC80	1.897
PDE4D	1.897
RETREG1	1.895
NMNAT3	1.892
SEPTIN7	1.891
GHR	1.889
LINC01415	1.886
OSBPL3	1.886
SNORA88	1.884
LINC00456	1.881
SOBP	1.88
PCDH8	1.879
EML6	1.873
RAB22A	1.873
GTDC1	1.872
SAMD4A	1.871
HTR1F	1.87
MAN2A1	1.862
STK32B	1.858
CHMP4B	1.856
LOC100505912	1.854
LOC102725080	1.853
WARS2	1.853
EXOC6B	1.852
FMN1	1.851
TGFA	1.849
MIR421	1.846
SCHIP1	1.843
RNF112	1.842
RPSAP52	1.834
DDAH1	1.831
AFAP1-AS1	1.829
LOC100130264	1.827
LINC01483	1.827
CAPN6	1.827
GNG2	1.822
LOC101927378	1.821
COG2	1.82
EIF4E	1.82
ZNF717	1.818
LINC01525	1.818
ROBO1	1.815
ZNF706	1.81
WDR27	1.809
LINC02615	1.809
PRPF40B	1.807
CD2	1.806
PALLD	1.793
FILIP1L	1.791
PHF14	1.791
CD28	1.789
TMEM222	1.787
PTHLH	1.782
GACAT3	1.78
PDHA2	1.779
RPL23AP32	1.778
ZC2HC1A	1.777
MBNL2	1.777
CEP152	1.774
DNAH6	1.771
LINC01361	1.771
RGS17	1.77
LOC105375556	1.77
SULF2	1.769
VLDLR	1.769
EEF1DP3	1.769
MIR3978	1.768
MIR3162	1.767
DLGAP1-AS2	1.767
CEACAM16	1.766
LOC440311	1.765
SIRLNT	1.763
DNPEP	1.763
LGR5	1.763
ABI3BP	1.759
KCNE4	1.757
DIS3L2	1.754
FAM3D	1.751
RAB18	1.75
IGLL5	1.748
THSD4	1.748
LINC02278	1.746
ZNF536	1.743
AZIN2	1.741
ADGRL2	1.737
MIR3921	1.733
MEAT6	1.733
CNOT6L	1.726
ZNF831	1.726
LINC00838	1.722
CD200	1.717
IGFL3	1.713
TMX1	1.713
THBD	1.711
ZDHHC13	1.709
CORO1C	1.707
MIR8058	1.704
ATXN7L3B	1.704
CCDC144CP	1.698
IQCH-AS1	1.698
GFPT1	1.696
CDH4	1.695
SCFD2	1.692
NRAP	1.691
LINC02425	1.686
LOC105372028	1.674
IGSF21	1.673
MIR4789	1.672
HECTD2-AS1	1.671
SLC38A1	1.669
PHC2	1.668
GDNF-AS1	1.658
SGIP1	1.656
LINC01088	1.655
LINC02583	1.653
GJD4	1.649
FER1L6	1.641
LOC100506098	1.641
MIR3126	1.639
HECA	1.639
SSTR4	1.638
PRICKLE2-AS2	1.635
SORL1	1.635
LARP4	1.633
HAS2	1.631
TMEM38B	1.631
KLF4	1.627
TMEM17	1.627
CAV2	1.626
LOC101928565	1.625
NCKAP5-AS2	1.625
LOC101928118	1.624
TANC2	1.623
SOX30	1.623
FOXN3	1.622
LOC399975	1.621
CCL2	1.617
ANGPTL2	1.615
TET2	1.613
TEKT3	1.612
POLE4	1.61
LINC02403	1.607
LINC02551	1.603
GRIP1	1.597
IGF2BP1	1.597
LUADT1	1.597
TGM2	1.597
ADGRL3-AS1	1.596
ARHGAP15	1.594
LOC100129434	1.59
LOC285638	1.588
LOC105377143	1.588
PARM1	1.586
IFNAR2	1.584
VPS54	1.572
THSD7B	1.571
LINC01848	1.571
PIK3AP1	1.57
NGF-AS1	1.564
TAS2R40	1.563
SOX14	1.561
MIR8054	1.56
FRG2B	1.558
LINC02301	1.558
DHX15	1.558
TMEM11	1.558
PLPPR5	1.555
STEAP1B	1.552
CP	1.551
RBMS3-AS3	1.545
MIR2278	1.544
EVL	1.544
SLC25A26	1.54
FANCF	1.537
LOC93463	1.536
COX18	1.534
DNAJB6	1.532
LCLAT1	1.531
TXK	1.527
SPART	1.524
DAGLA	1.517
HSPA12A	1.517
CCNG2	1.517
SEC22B	1.515
LOC339685	1.514
LOC102606465	1.511
CT75	1.51
LINC01960	1.509
LOC102724579	1.509
SNORD151	1.507
MTBP	1.506
LRRC17	1.501
GADL1	1.501
RECK	1.497
SNX29	1.497
TNFRSF19	1.496
SH3PXD2B	1.493
GXYLT1	1.489
TNFSF18	1.488
RFC3	1.488
DNAH17	1.485
CXCL13	1.479
LRIG3	1.478
UTRN	1.477
ELMOD1	1.475
NHEG1	1.474
EMC2	1.469
KAZN	1.468
DOCK4	1.467
LINC01713	1.466
MGC15885	1.462
DIPK1A	1.462
FAM180A	1.461
TUT7	1.458
CAMK2D	1.457
SULF1	1.456
TRIM33	1.452
LOC110091768	1.449
LINC01271	1.448
LOC100288798	1.442
MIR8070	1.44
LINC00945	1.438
EPM2A	1.437
KCNMB4	1.437
SLC9A8	1.435
LINC01017	1.431
LOC101928881	1.431
GSAP	1.429
ST7-AS2	1.426
RPS6KA2	1.425
MIR3681HG	1.425
WDFY2	1.424
MIR1246	1.421
MIR6079	1.421
NCAM1-AS1	1.419
C1orf100	1.415
SLC25A51	1.414
ZSWIM6	1.413
SLC38A9	1.41
LINC01613	1.41
METTL8	1.41
LINC00954	1.409
SNX33	1.407
FAM189A2	1.401
COL1A2	1.397
CHD6	1.397
C20orf85	1.393
TNFSF8	1.382
MEF2C	1.38
SLC35G2	1.379
SSUH2	1.376
KRT87P	1.369
LINC01473	1.365
UGP2	1.364
LOC100507477	1.361
VRK2	1.359
NME9	1.357
BLCAP	1.353
LINC01584	1.352
PTGER2	1.349
LOC729968	1.347
SERTAD2	1.347
LOC101927557	1.345
LOC102723345	1.345
SNORA70C	1.341
SORCS1	1.339
LINC01482	1.339
GZMK	1.337
LRIG1	1.335
LRRC14B	1.335
RPL39L	1.332
ARHGAP28	1.319
PEG3	1.317
LOC101928386	1.314
PIPSL	1.311
LRRC1	1.31
TTLL6	1.309
MIR5000	1.303
CSTF2T	1.297
LINC00494	1.296
SLC25A51P1	1.293
LINC01065	1.291
LOC105369146	1.285
RBM33	1.285
LMOD3	1.28
ACSL3	1.278
AFP	1.276
ENTPD1	1.274
TRDMT1	1.274
LINC02527	1.269
CYP26B1	1.26
LINC02257	1.259
SAMD9	1.258
LOC100507377	1.248
LINC02709	1.245
IHH	1.242
RND3	1.234
LOC101928861	1.234
MIR4729	1.232
RERE	1.232
LINC01895	1.224
KCNS1	1.221
AP3M2	1.22
IRX1	1.215
LOC729815	1.207
FOXO6	1.206
FAM229B	1.204
LEP	1.204
ALG5	1.198
JAK1	1.196
MB21D2	1.196
TPM1	1.192
IGFBPL1	1.187
TTI1	1.17
POPDC3	1.168
ZNF438	1.163
FAM83C	1.16
MIR4755	1.159
CRBN	1.159
DIRAS3	1.154
LOC105370980	1.138
CAPZA3	1.138
MRPL33	1.137
GTF3A	1.135
LINC02644	1.135
FOXO1	1.133
ERI3	1.133
TRABD2A	1.132
PHACTR2-AS1	1.128
NECTIN1	1.128
SLC37A2	1.123
LINC01507	1.113
OR9Q1	1.112
NOP56	1.112
SUMF1	1.103
IL22	1.102
LINC02483	1.099
LOC101928782	1.098
HSD52	1.098
STARD13	1.094
TSL	1.082
CPNE1	1.081
GNAQ	1.079
MIR548AG2	1.077
ZNF521	1.074
MLLT10P1	1.07
STT3B	1.064
CGNL1	1.061
LINC02762	1.054
LOC101928936	1.053
MIR548H3	1.052
VGLL3	1.049
LOC101926964	1.048
DYNC1I1	1.046
ITGA6	1.041
GALNT18	1.039
RAPGEF5	1.038
LINC02578	1.037
LINC01522	1.034
SORT1	1.032
TMEM74	1.03
MAN1A2	1.029
LINC00520	1.028
MTMR2	1.024
C1QTNF1	1.024
GPR3	1.016
LINC01048	1.016
LOC646030	1.014
MSL2	1.013
CD36	1.012
ALG6	1.008
LINC02056	1.005
TMEM229A	1.003
TSPAN11	0.999
TPRG1-AS2	0.996
PURG	0.995
TPRG1-AS1	0.994
TIMP4	0.994
LINC01523	0.986
LOC100130298	0.971
ATOH8	0.967
UQCC1	0.962
CNTN4-AS1	0.962
ANKS6	0.954
TMEM218	0.951
MIR4435-2	0.948
ARHGAP29	0.947
SLC26A7	0.946
EBNA1BP2	0.941
MACROD2	0.941
SMIM21	0.937
ADGRG7	0.934
SLC26A5	0.933
KCNV2	0.933
MIR206	0.918
LAMB4	0.916
MPP6	0.913
PRICKLE2-AS1	0.909
LOC105377162	0.908
PCSK6-AS1	0.907
PTGFRN	0.901
SLC2A1-AS1	0.9
PCDH7	0.9
PLPPR1	0.899
TBX18-AS1	0.897
COL21A1	0.897
LINC01140	0.895
ARHGAP42	0.889
GSEC	0.877
CPA1	0.875
MTHFD2L	0.872
LOC101929621	0.87
AHR	0.869
EGOT	0.864
NCKAP5	0.863
TBKBP1	0.862
GSDME	0.861
ADAMTS6	0.855
MIR6074	0.852
ABCA4	0.85
CTSO	0.847
LOC101927450	0.842
JAKMIP2-AS1	0.834
CADM2-AS2	0.827
BMP2	0.827
MIR592	0.826
GREB1L	0.823
SH3GLB1	0.818
NHLRC3	0.814
KDM3A	0.814
MIR4634	0.808
CRIPT	0.808
LINC02148	0.804
BMP7	0.803
COL19A1	0.797
PPDPFL	0.796
NUFIP1	0.792
MCHR2	0.79
LINC01648	0.789
TNFSF4	0.789
LINC01564	0.788
MIR9900	0.786
EPB41L3	0.785
DOK1	0.779
CADM2	0.772
SNORA59B	0.769
PFDN4	0.768
CDK14	0.767
FAT2	0.765
RIN2	0.761
TMC3	0.753
LINC00917	0.751
OR9A2	0.749
LOC101928098	0.745
EBLN2	0.738
MIR6131	0.731
LINC01878	0.729
MIR4652	0.729
MIR183	0.728
POLR2M	0.718
LMNTD1	0.713
LINC01495	0.71
SFRP1	0.707
CEP41	0.698
LINC01135	0.693
RUSC2	0.692
MIR374B	0.684
LOC101928516	0.683
LOC105371849	0.681
NPAT	0.674
FAM126A	0.673
BBS12	0.653
MFHAS1	0.647
IYD	0.645
BHLHE40-AS1	0.645
PDE4DIP	0.637
LINC02518	0.629
ZIC4	0.629
ASCC3	0.629
FAM20A	0.627
ANO5	0.626
FLRT2	0.623
SBF2	0.621
MIG7	0.62
MAP1B	0.619
LINC02098	0.61
LINC01780	0.609
LINC02199	0.608
C3orf79	0.604
RFXAP	0.6
DNAH9	0.595
POFUT1	0.595
AICDA	0.593
LINC01804	0.59
COL8A1	0.59
DRD2	0.59
FRY	0.587
LINC01776	0.586
RASSF10	0.585
STARD3NL	0.583
HNRNPA2B1	0.58
LOC101927630	0.579
EDIL3	0.579
MIR4287	0.579
C1QTNF2	0.568
SAMD13	0.564
ZFHX4	0.564
ECT2L	0.562
MCC	0.562
FHIT	0.553
POU1F1	0.547
PLCG1	0.546
RBM43	0.545
SLC2A1	0.544
LINC01833	0.537
NCOA5	0.533
SUSD1	0.532
LINC02075	0.532
PBX1	0.531
LINC01267	0.53
TCEA3	0.524
MIR4431	0.523
CLSTN2	0.514
IGFBP5	0.513
MSRB2	0.508
TMEM217	0.508
VGLL2	0.507
AGBL1	0.501
HM13-AS1	0.5
MIR4296	0.498
FAT1	0.493
LOC101927907	0.49
INO80D	0.487
RAB29	0.484
ST7-OT3	0.48
NOD1	0.478
SIX6	0.478
FABP7	0.477
HIBADH	0.476
SMILR	0.473
DHFRP3	0.473
GAS2L3	0.472
KLHL6	0.469
PSEN2	0.467
SNORA98	0.466
BACH2	0.464
LINC00423	0.459
MIR3148	0.456
LINC02664	0.451
CPQ	0.451
DAW1	0.445
MIR5702	0.445
FAM13A-AS1	0.444
LINC00211	0.444
EIF3F	0.439
ATP8B4	0.433
VAPB	0.433
EIF2AK3	0.432
CUEDC1	0.43
MTURN	0.427
LOC105375075	0.425
MIR5087	0.423
RHBDD1	0.421
CSNK1G3	0.42
DLD	0.417
LINC02089	0.416
XPNPEP1	0.413
RAPGEF1	0.407
HDAC9	0.404
MIR603	0.401
NBPF7	0.399
LRRC61	0.392
MAGI1-IT1	0.389
TDRD15	0.383
EPDR1	0.382
SLC3A1	0.378
DNAJC5B	0.376
LINC01493	0.375
SERTM1	0.366
TRMT10B	0.364
MIR600	0.361
GNAI1	0.36
FLJ20021	0.359
MIR548AE1	0.353
XRCC4	0.343
MIR4297	0.338
AGBL3	0.338
LOC101928775	0.336
LOC101927847	0.329
GNAT3	0.327
OSTC	0.325
LMOD2	0.325
SERBP1	0.32
FAM104A	0.315
GBF1	0.312
MRPS28	0.312
LINC00824	0.308
ZNF385D-AS1	0.306
LINC00326	0.301
KCNIP4	0.3
RPL13AP17	0.298
LINC01753	0.297
HRH1	0.293
ESYT3	0.293
LINC00222	0.289
LINC02408	0.288
ARFGEF2	0.285
SPATA13-AS1	0.285
CUL3	0.282
VTCN1	0.281
PCP4	0.271
SDC4	0.269
LINC00971	0.266
LINC01931	0.263
LINC02032	0.26
MIR450B	0.26
GJA10	0.256
SLC44A3	0.253
PDE1A	0.252
ADAMTS8	0.25
MIR3199-1	0.245
FILNC1	0.245
GRM7-AS2	0.243
LINC00907	0.238
CECR3	0.23
LOC101928048	0.226
FAM124B	0.222
BNC1	0.222
ZFP64	0.222
LOC284898	0.22
VAV3	0.218
LINC02046	0.215
MATN1-AS1	0.213
TOP1	0.212
TOX2	0.209
TGFB3	0.206
NT5E	0.205
MEGF9	0.204
COBL	0.203
EMILIN3	0.203
RPA3	0.202
CBLN2	0.201
LOC101927571	0.198
LINC01170	0.197
GPR88	0.196
TOP1P2	0.193
DOCK8	0.189
FAM49A	0.187
MYZAP	0.185
PLEKHG1	0.182
SLC4A3	0.179
LINC01427	0.178
LINC00265	0.177
MED4	0.176
CXCR4	0.173
FGF9	0.172
NNMT	0.169
CTSZ	0.166
FRMD6	0.162
CDH2	0.159
BCAS1	0.158
BRF2	0.158
SLC16A2	0.149
TGFBR2	0.149
LINC02231	0.149
PCAT19	0.146
ATF7IP	0.145
MIR7852	0.143
TMEM132D	0.141
EFCAB13	0.141
ACTN4	0.141
TMEM61	0.133
IMMP2L	0.133
TANK	0.132
MIR1256	0.127
PPFIBP1	0.124
PHLDA3	0.124
WDR44	0.119
PEG10	0.118
LINC02039	0.117
IMPG2	0.111
PUS7	0.1
RUNX1	0.097
SLC30A8	0.094
MITF	0.093
SLC2A10	0.092
CCDC34	0.088
TDG	0.088
[truncated: 1,353 more rows]

## Sheet: Tab2. H3K4me3 new peaks PFI-90
Supplementary Table S5, Tab2. New H3K4me3 Peaks after PFI-90 Treatment vs DMSO
Chr	Start	End	Nearest PromoterID	Entrez ID	Gene Name
chr22	43084594	43084898	NR_146459	53947	A4GALT
chr1	94527203	94527394	NM_000350	24	ABCA4
chr1	94511272	94511463	NM_000350	24	ABCA4
chr19	1039642	1039892	NM_019112	10347	ABCA7
chr16	16116237	16116448	NM_004996	4363	ABCC1
chr21	43577483	43577687	NM_207627	9619	ABCG1
chr20	62485767	62486176	NM_080622	140701	ABHD16B
chr14	23082931	23083146	NM_022060	63874	ABHD4
chr3	100673942	100674161	NM_015429	25890	ABI3BP
chr9	133720825	133721077	NM_005157	25	ABL1
chr6	26607875	26608066	NM_013375	29777	ABT1
chr3	127463105	127463334	NM_172027	80325	ABTB1
chr11	34296475	34296700	NM_145804	25841	ABTB2
chr18	47252439	47252660	NM_006111	10449	ACAA2
chr12	109568881	109569563	NM_001093	32	ACACB
chr9	19408622	19408813	NM_001010887	340485	ACER2
chr9	19481950	19482144	NM_001010887	340485	ACER2
chr2	237690756	237691020	NM_020311	57007	ACKR3
chr15	78499229	78499488	NM_015162	23205	ACSBG1
chr20	25017316	25017568	NM_001252676	84532	ACSS1
chr10	90694869	90695118	NR_125373	100132116	ACTA2-AS1
chr20	32252557	32252748	NM_001024675	170487	ACTL10
chr9	111545470	111545706	NM_006686	10880	ACTL7B
chr9	111449754	111449945	NM_006686	10880	ACTL7B
chr19	39137839	39138099	NM_004924	81	ACTN4
chr19	39157848	39158072	NM_001322033	81	ACTN4
chr7	152433473	152433670	NR_146947	57180	ACTR3B
chr7	152432830	152433073	NR_146947	57180	ACTR3B
chr10	127942061	127942399	NM_001288974	8038	ADAM12
chr10	128074496	128074868	NM_001288974	8038	ADAM12
chr10	127931254	127931517	NM_001288974	8038	ADAM12
chr10	128065962	128066153	NM_001288974	8038	ADAM12
chr11	130397902	130398179	NM_139055	170689	ADAMTS15
chr11	130319727	130319918	NM_139055	170689	ADAMTS15
chr5	178745549	178745775	NM_014244	9509	ADAMTS2
chr5	178745142	178745358	NM_014244	9509	ADAMTS2
chr5	178670401	178670622	NM_014244	9509	ADAMTS2
chr3	64834222	64834430	NM_182920	56999	ADAMTS9
chr3	64875861	64876052	NM_182920	56999	ADAMTS9
chr3	64519527	64519718	NR_110151	101929335	ADAMTS9-AS1
chr9	136399838	136400289	NM_014694	9719	ADAMTSL2
chr7	941465	941676	NM_001284311	11033	ADAP1
chr21	46546251	46546455	NM_001346687	104	ADARB1
chr21	46546538	46546785	NM_001346687	104	ADARB1
chr19	1897426	1897978	NM_138422	113179	ADAT3
chr14	24801304	24801499	NM_139247	196883	ADCY4
chr16	50279445	50279822	NM_001114	113	ADCY7
chr18	908987	909267	NM_001117	116	ADCYAP1
chr7	31066653	31067013	NM_001199636	117	ADCYAP1R1
chr7	31082814	31083044	NM_001199636	117	ADCYAP1R1
chr8	37679091	37679622	NM_032777	25960	ADGRA2
chr8	37659884	37660399	NM_032777	25960	ADGRA2
chr19	14491732	14492063	NM_001784	976	ADGRE5
chr6	46903420	46903611	NM_001098518	221395	ADGRF5
chrX	19141002	19141193	NM_001184836	10149	ADGRG2
chr19	14359621	14359838	NM_001008701	22859	ADGRL1
chr1	81519662	81519863	NM_001366003	23266	ADGRL2
chr2	3455638	3456020	NM_001306077	55256	ADI1
chr22	24828303	24828709	NM_001278498	135	ADORA2A
chr15	73089416	73089625	NM_001365227	83440	ADPGK
chr20	4206737	4207035	NM_000678	146	ADRA1D
chr10	115718934	115719206	NM_000684	153	ADRB1
chr5	148292577	148292768	NM_000024	154	ADRB2
chr14	105190207	105190455	NM_152328	122622	ADSSL1
chr7	44143366	44143611	NM_001129	165	AEBP1
chr4	7809026	7809221	NR_026892	84740	AFAP1-AS1
chr10	116122123	116122411	NM_001001936	84632	AFAP1L2
chr4	88029368	88029559	NM_005935	4299	AFF1
chr16	90037624	90037829	NR_003228	172	AFG3L1P
chr2	236405031	236405345	NM_001037131	116987	AGAP1
chr2	236377601	236377816	NM_014914	116987	AGAP1
chr2	236223359	236223550	NM_014914	116987	AGAP1
chr15	86516751	86517093	NM_152336	123624	AGBL1
chr1	50489751	50489945	NM_001323575	84871	AGBL4
chr8	141619361	141619552	NM_012154	27161	AGO2
chr8	141599415	141599930	NM_012154	27161	AGO2
chr9	139582157	139582374	NM_001012727	10555	AGPAT2
chr9	88358451	88358759	NM_001330701	23287	AGTPBP1
chr1	110502435	110502626	NM_006621	10768	AHCYL1
chr1	27884108	27884405	NM_001029882	27245	AHDC1
chr1	27899576	27900122	NM_001029882	27245	AHDC1
chr1	27883545	27883828	NM_001029882	27245	AHDC1
chr1	27882330	27882521	NM_001029882	27245	AHDC1
chr11	62306495	62306741	NM_001346446	79026	AHNAK
chr14	105444906	105445119	NM_138420	113146	AHNAK2
chr14	105436899	105437189	NM_001350929	113146	AHNAK2
chr17	19883730	19884231	NM_001330152	11216	AKAP10
chr15	86162282	86162499	NM_001270546	11214	AKAP13
chr14	32895960	32896151	NM_004274	9472	AKAP6
chr14	33058199	33058444	NM_004274	9472	AKAP6
chr14	32976967	32977158	NM_004274	9472	AKAP6
chr10	4891707	4891987	NM_001040177	83592	AKR1E2
chr9	38386307	38386552	NM_000692	219	ALDH1B1
chr9	38380926	38381117	NM_000692	219	ALDH1B1
chr12	112213448	112213770	NM_001204889	217	ALDH2
chr1	19248512	19248856	NM_001319218	8659	ALDH4A1
chr1	19227519	19227802	NM_170726	8659	ALDH4A1
chr16	30072590	30072787	NM_184043	226	ALDOA
chr19	6372260	6372569	NM_032306	84266	ALKBH7
chr13	31324064	31324331	NM_001629	241	ALOX5AP
chr11	44264762	44264980	NM_021926	60529	ALX4
chr9	116822283	116822474	NM_001633	259	AMBP
chr3	49757277	49757474	NM_198722	386724	AMIGO3
chr12	31902118	31902309	NR_103522	196394	AMN1
chr4	145956377	145956624	NM_001318367	10393	ANAPC10
chr19	8432032	8432267	NR_104213	51129	ANGPTL4
chr19	8427063	8427309	NM_139314	51129	ANGPTL4
chr8	41559107	41559325	NM_020480	286	ANK1
chr8	41570354	41570746	NM_020480	286	ANK1
chr10	62174799	62175084	NM_020987	288	ANK3
chr16	89565204	89565453	NM_001256182	29123	ANKRD11
chr11	67045333	67045534	NM_001347901	338692	ANKRD13D
chr9	33523332	33523576	NM_001353432	441459	ANKRD18B
chr10	99302776	99302989	NM_001291218	26287	ANKRD2
chr10	36897635	36897847	NM_052997	91074	ANKRD30A
chr5	10596207	10596437	NM_001164440	651746	ANKRD33B
chr2	198174782	198175015	NM_153697	91526	ANKRD44
chr4	125825184	125825424	NM_020337	57182	ANKRD50
chr5	55574348	55574539	NM_024669	79722	ANKRD55
chr6	90272051	90272245	NM_001242811	22881	ANKRD6
chr20	56804361	56804568	NM_001304369	140731	ANKRD60
chr14	102990756	102990965	NM_001348652	122416	ANKRD9
chr9	101546481	101546765	NM_173551	203286	ANKS6
chr3	43794968	43795297	NM_001346468	55129	ANO10
chr12	101445931	101446122	NM_001286616	121601	ANO4
chr12	45862953	45863176	NM_001142678	196527	ANO6
chr11	444480	444671	NM_001347882	338440	ANO9
chr15	90345943	90346170	NM_001150	290	ANPEP
chr15	90345585	90345791	NM_001150	290	ANPEP
chr2	69260290	69260481	NM_032208	84168	ANTXR1
chr15	60685430	60685621	NM_004039	302	ANXA2
chr15	60686135	60686591	NM_004039	302	ANXA2
chr15	60663961	60664174	NM_004039	302	ANXA2
chr7	36684892	36685084	NR_046764	100874264	AOAH-IT1
chr7	150574110	150574372	NM_001091	26	AOC1
chr2	201577957	201578166	NR_135011	107161151	AOX3P-AOX2P
chr8	42027369	42027587	NM_006803	10947	AP3M2
chr10	26624242	26624444	NM_019043	54518	APBB1IP
chr4	41001108	41001334	NM_001166054	323	APBB2
chr4	41216819	41217041	NM_001166050	323	APBB2
chr19	1453771	1454009	NM_001351273	10297	APC2
chr19	1450108	1450323	NM_005883	10297	APC2
chr20	57147004	57147209	NM_153360	164284	APCDD1L
chr20	57142950	57143297	NM_153360	164284	APCDD1L
chr11	116706592	116706793	NR_126362	104326055	APOA1-AS
chr22	36123679	36123870	NM_030642	80831	APOL5
chr21	27653301	27653660	NM_001136131	351	APP
chr7	30971162	30971361	NM_001329872	358	AQP1
chr7	30971546	30971754	NM_001329872	358	AQP1
chr9	33445768	33445965	NM_004925	360	AQP3
chr12	50353388	50353637	NM_001651	362	AQP5
chr16	25236792	25237019	NM_001169	343	AQP8
chr22	43253450	43253744	NM_001142293	26286	ARFGAP3
chr20	47509217	47509488	NM_006420	10564	ARFGEF2
chr11	46696896	46697230	NM_004308	392	ARHGAP1
chr15	30918983	30919185	NM_001039841	89839	ARHGAP11B
chr5	142446347	142446548	NR_046816	100874372	ARHGAP26-IT1
chr5	142556922	142557141	NR_046816	100874372	ARHGAP26-IT1
chr18	6724170	6724377	NM_001366231	79822	ARHGAP28
chr19	47359155	47359383	NM_004491	2909	ARHGAP35
chrX	153194079	153194348	NM_001164741	393	ARHGAP4
chr11	100508366	100508666	NM_001367945	143872	ARHGAP42
chr19	1071132	1071335	NM_001282335	23526	ARHGAP45
chr19	1074524	1074746	NM_001282334	23526	ARHGAP45
chr1	3408018	3408230	NM_014448	27237	ARHGEF16
chr1	155950641	155950857	NM_001350112	9181	ARHGEF2
chr3	57144860	57145170	NM_001128615	50650	ARHGEF3
chrX	135837473	135837733	NM_001306177	9459	ARHGEF6
chrX	135863305	135863761	NM_004840	9459	ARHGEF6
chr6	157274279	157274551	NM_001363725	57492	ARID1B
chr19	933598	933816	NM_005224	1820	ARID3A
chr15	74838240	74838431	NM_006465	10620	ARID3B
chr11	30386349	30386540	NM_152316	120534	ARL14EP
chr7	12700021	12700329	NM_212460	10124	ARL4A
chr10	23138338	23138531	NM_001282747	219681	ARMC3
chr11	13229382	13229728	NM_001351804	406	ARNTL
chr3	35705884	35706118	NM_001025069	10777	ARPP21
chr8	131531210	131531401	NM_001362925	50807	ASAP1
chr8	131526683	131526974	NM_001362925	50807	ASAP1
chr2	9375444	9375689	NM_003887	8853	ASAP2
chr14	94437530	94437791	NM_001202429	51676	ASB2
chr9	132402725	132402917	NM_017873	140459	ASB6
chr15	93374890	93375170	NR_033769	728619	ASB9P1
chr12	50457232	50457423	NR_046389	41	ASIC1
chr2	220374616	220374823	NM_018674	55515	ASIC4
chr2	220377889	220378142	NM_018674	55515	ASIC4
chr2	220377461	220377668	NM_018674	55515	ASIC4
chr22	26718315	26718566	NM_020437	57168	ASPHD2
chr1	1440329	1440782	NM_018188	55210	ATAD3A
chr1	212769876	212770136	NM_001674	467	ATF3
chr12	14411091	14411781	NM_018179	55729	ATF7IP
chr16	81069154	81069345	NM_015251	23300	ATMIN
chr2	85987736	85987927	NM_032827	84913	ATOH8
chr2	85956326	85956598	NM_032827	84913	ATOH8
chr5	151120114	151120460	NM_004045	475	ATOX1
chr13	113365910	113366101	NM_015205	23250	ATP11A
chr3	182458518	182458746	NM_014616	23200	ATP11B
chr16	28886376	28886593	NM_004320	487	ATP2A1
chr17	3864078	3864436	NM_174953	489	ATP2A3
chr12	90177406	90177629	NM_001366531	490	ATP2B1
chr19	36048520	36048726	NM_000704	495	ATP4A
chr21	35267019	35267287	NM_001697	539	ATP5PO
chr5	81644779	81644970	NM_001017971	92270	ATP6AP1L
chrX	40398624	40399186	NM_005765	10159	ATP6AP2
chr16	2547641	2547832	NM_001198569	527	ATP6V0C
chr2	71175487	71175985	NR_110273	101927750	ATP6V1B1-AS1
chr8	20089448	20089668	NM_001693	526	ATP6V1B2
chr2	10861473	10861666	NM_001039362	245973	ATP6V1C2
chr19	1789637	1789922	NR_047593	148229	ATP8B3
chr20	50312646	50312859	NM_006045	10079	ATP9A
chr6	16722171	16722366	NR_152114	6310	ATXN1
chr7	105435466	105435680	NM_020725	222255	ATXN7L1
chr7	69204330	69204523	NM_001127232	26053	AUTS2
chr12	63545684	63545925	NM_000706	552	AVPR1A
chrX	153166482	153166763	NR_027419	554	AVPR2
chr16	377344	377684	NM_003502	8312	AXIN1
chr19	41729644	41729840	NM_001278599	558	AXL
chr6	71817549	71817745	NM_080742	135152	B3GAT2
chr2	232265099	232265396	NM_145236	93010	B3GNT7
chr11	368541	368958	NM_178537	338707	B4GALNT4
chr8	104220179	104220444	NR_109954	100499183	BAALC-AS1
chr6	90840415	90840606	NM_021813	60468	BACH2
chr7	98029161	98029393	NM_018842	55971	BAIAP2L1
chr13	23278025	23278287	NR_033774	646201	BASP1P1
chr11	27240511	27240702	NR_125768	103695435	BBOX1-AS1
chr11	27237618	27237863	NR_125768	103695435	BBOX1-AS1
chr19	45311425	45311616	NM_005581	4059	BCAM
chr16	75290805	75291024	NM_014567	9564	BCAR1
chr16	75354061	75354314	NM_001170715	9564	BCAR1
chr1	94018266	94018561	NM_001308251	8412	BCAR3
chr1	94316234	94316428	NM_001261408	8412	BCAR3
chr2	60761190	60761381	NM_001365609	53335	BCL11A
chr2	60757587	60757821	NM_001365609	53335	BCL11A
chr14	99513450	99513684	NM_022898	64919	BCL11B
chr14	99732818	99733019	NM_022898	64919	BCL11B
chr18	60845323	60845672	NM_000657	596	BCL2
chr18	60835745	60836011	NM_000657	596	BCL2
chr1	147071630	147071846	NM_004326	607	BCL9
chr11	118780912	118781129	NM_182557	283149	BCL9L
chr11	118779669	118779902	NM_182557	283149	BCL9L
chrX	39959662	39959891	NM_017745	54880	BCOR
chrX	129095570	129095902	NM_001184772	63035	BCORL1
chr22	23560749	23561039	NM_004327	613	BCR
chr22	25029506	25029771	NR_024494	644165	BCRP3
chr14	96741659	96741987	NM_000710	623	BDKRB1
chr14	96727308	96727587	NM_000710	623	BDKRB1
chr11	27744495	27744706	NM_170731	627	BDNF
chr16	66461148	66461359	NM_001197225	146227	BEAN1
chr16	66461481	66461739	NM_001197225	146227	BEAN1
chr19	12868630	12868932	NM_017682	54831	BEST2
chr19	12860570	12861086	NM_017682	54831	BEST2
chrX	152753757	152754246	NM_001711	633	BGN
chrX	101995067	101995258	NM_001142530	80823	BHLHB9
chr3	5025848	5026230	NR_125915	100507582	BHLHE40-AS1
chr10	60235103	60235354	NM_001080512	80114	BICC1
chr2	127868837	127869028	NM_139347	274	BIN1
chr11	102139124	102139397	NM_182962	330	BIRC3
chr20	36193701	36194170	NM_001167820	10904	BLCAP
chr20	36139828	36140019	NM_001317075	10904	BLCAP
chr4	6750944	6751193	NM_018366	55330	BLOC1S4
chr15	40384238	40384486	NM_001003942	90427	BMF
chr15	40396786	40396992	NM_001003942	90427	BMF
chr15	40390732	40390951	NM_001003942	90427	BMF
chr20	55833038	55833452	NM_001719	655	BMP7
chr1	40251713	40252014	NM_001720	656	BMP8B
chr7	33871785	33872212	NM_133468	168667	BMPER
chr22	22711531	22711750	NR_027293	96610	BMS1P20
chr9	16522408	16522599	NR_151723	111216284	BNC2-AS1
chr5	173072691	173072882	NM_001159651	91272	BOD1
chr2	242480791	242481054	NM_032515	666	BOK
chr2	242485726	242485971	NM_032515	666	BOK
chr19	15391989	15392327	NM_058243	23476	BRD4
chr1	32866630	32866863	NR_125352	55108	BSDC1
chr4	15719347	15719538	NM_004334	683	BST1
chr10	93807880	93808104	NM_003972	9044	BTAF1
chr10	124058510	124058752	NM_144587	118663	BTBD16
chr19	2032598	2032903	NM_017797	55643	BTBD2
chr1	203289786	203289985	NM_006763	7832	BTG2
chr1	203294396	203294587	NM_006763	7832	BTG2
chr15	40442290	40442505	NM_001211	701	BUB1B
chr10	29264916	29265131	NM_001278522	283080	C10orf126
chr10	75716129	75716353	NR_160937	414236	C10orf55
chr10	75700613	75700943	NR_160937	414236	C10orf55
chr10	118447883	118448074	NM_001330142	143379	C10orf82
chr10	128340382	128340609	NM_001350923	118611	C10orf90
chr11	68025109	68025363	NM_001300913	53838	C11orf24
chr11	130580904	130581334	NM_001271983	283171	C11orf44
chr11	65679446	65679664	NM_001135635	83638	C11orf68
chr11	108983631	108983822	NM_207645	399947	C11orf87
chr11	109293809	109294188	NM_207645	399947	C11orf87
chr11	43955291	43955482	NM_001145033	387763	C11orf96
chr12	105379481	105379691	NM_152318	121053	C12orf45
chr15	93064938	93065243	NR_161370	145858	C15orf32
chr15	39522662	39522853	NR_144507	400360	C15orf54
chr15	39464063	39464263	NR_144507	400360	C15orf54
chr16	73204459	73204650	NM_207385	388289	C16orf47
chr17	236100	236359	NM_001013672	400566	C17orf97
chr18	43733376	43733569	NM_001008239	147339	C18orf25
chr1	172369256	172369468	NM_139240	92346	C1orf105
chr1	172368515	172368729	NM_139240	92346	C1orf105
chr1	67614783	67614976	NM_001276352	400757	C1orf141
chr1	218673337	218673576	NR_146760	440714	C1orf143
chr1	218653172	218653573	NR_146760	440714	C1orf143
chr1	231001879	231002070	NM_032800	84886	C1orf198
chr1	156427526	156427731	NR_135264	10485	C1orf61
chr17	77023893	77024117	NR_040018	100507410	C1QTNF1-AS1
chr16	1138308	1138628	NM_207419	390664	C1QTNF8
chr20	10982388	10982753	NR_146878	728434	C20orf187
chr20	58633269	58633547	NR_161292	284756	C20orf197
chr20	58633732	58633992	NR_161292	284756	C20orf197
chr15	62359911	62360126	NM_207322	145741	C2CD4A
chr15	62456906	62457144	NM_001007595	388125	C2CD4B
chr2	54598815	54599006	NM_001369403	129852	C2orf73
chr3	133646657	133646874	NR_161373	80111	C3orf36
chr5	102560214	102560416	NM_033211	90355	C5orf30
chr5	173400429	173400669	NM_001144954	133491	C5orf47
chr5	173400060	173400299	NM_001144954	133491	C5orf47
chr7	6629204	6629528	NM_024067	79034	C7orf26
chr7	100063621	100063871	NM_001004323	402573	C7orf61
chr7	47825970	47826161	NR_161268	80099	C7orf69
chr8	94416254	94416640	NR_161372	389676	C8orf87
chr8	94373289	94373490	NR_161372	389676	C8orf87
chr9	89890025	89890307	NR_161226	401535	C9orf170
chr9	89849087	89849278	NR_161226	401535	C9orf170
chr9	74639858	74640049	NM_001128618	138240	C9orf57
chr9	16144474	16145038	NM_001271829	100129385	C9orf92
chr9	16064258	16064449	NM_001271829	100129385	C9orf92
chr9	16140080	16140372	NM_001271829	100129385	C9orf92
chr17	58220478	58220669	NM_000717	762	CA4
chr7	82188792	82188991	NM_001366867	781	CACNA2D1
chr3	54180633	54180825	NM_018398	55799	CACNA2D3
chr17	64901331	64901522	NM_014405	27092	CACNG4
chr19	3627217	3627420	NM_021231	58509	CACTIN
chr19	44139150	44139341	NM_145296	199731	CADM4
chr14	90875791	90875982	NM_001363670	801	CALM1
chr2	47401373	47401590	NM_001305626	805	CALM2
chr19	47105933	47106167	NM_001329922	808	CALM3
chr10	5589769	5590198	NR_120497	100132159	CALML3-AS1
chr10	12490722	12490994	NM_001351032	57118	CAMK1D
chr10	12490399	12490590	NM_001351032	57118	CAMK1D
chr10	75648539	75648730	NM_001204492	818	CAMK2G
chr1	20803172	20803410	NM_018584	55450	CAMK2N1
chr2	44775604	44775980	NM_024766	79823	CAMKMT
chr9	138778614	138778920	NM_015447	157922	CAMSAP1
chr1	7020254	7020452	NM_001349609	23261	CAMTA1
chr1	7764610	7764840	NM_001349618	23261	CAMTA1
chr1	6995647	6995981	NM_001349609	23261	CAMTA1
chr3	12852065	12852261	NM_012298	23066	CAND2
chr1	223959458	223959681	NM_001748	824	CAPN2
chr11	76784596	76785058	NM_004055	726	CAPN5
chr1	230889622	230889832	NM_006615	10753	CAPN9
chr1	19809916	19810250	NM_001282162	832	CAPZB
chr6	25369376	25369597	NM_017640	55604	CARMIL1
chr5	71078952	71079230	NM_004291	9607	CARTPT
chr6	21687417	21687608	NR_015410	401237	CASC15
chr6	21769723	21769914	NR_015410	401237	CASC15
chr6	92757498	92757806	NR_104154	101929083	CASC6
chr5	95949942	95950171	NM_001042442	831	CAST
chr1	10927384	10927704	NM_017766	54897	CASZ1
chr7	116151663	116152123	NM_001206748	858	CAV2
chr3	8752083	8752408	NM_033337	859	CAV3
chr16	89008526	89008734	NM_175931	863	CBFA2T3
chr20	54463954	54464203	NM_080617	140689	CBLN4
chr4	169991487	169991678	NM_032783	84869	CBR4
chr17	77805881	77806278	NM_003655	8535	CBX4
chr17	77771202	77771397	NM_020649	57332	CBX8
chr17	77783650	77783853	NM_020649	57332	CBX8
chr18	57357590	57357835	NM_133459	147372	CCBE1
chr22	42212605	42212857	NM_024821	79879	CCDC134
chr2	179914498	179914781	NM_001316745	285025	CCDC141
chr17	20188201	20188422	NR_023380	348254	CCDC144CP
chr17	20170698	20171038	NR_023380	348254	CCDC144CP
chr19	49895253	49895491	NM_144688	147872	CCDC155
chr9	100056020	100056218	NM_001348010	100499483	CCDC180
chr5	127211390	127211581	NM_001317938	728586	CCDC192
chr8	130720180	130720467	NR_130917	137196	CCDC26
chr8	130656624	130656815	NR_130917	137196	CCDC26
chr8	130694196	130694396	NR_130917	137196	CCDC26
chr17	80163971	80164209	NM_198082	284001	CCDC57
chr12	111264744	111264936	NM_001286243	160762	CCDC63
chr7	106239147	106239342	NM_175884	168455	CCDC71L
chr19	46895337	46895674	NM_032040	83987	CCDC8
chr19	46907195	46907407	NM_032040	83987	CCDC8
chr19	46895860	46896096	NM_032040	83987	CCDC8
chr3	112395966	112396157	NM_199512	151887	CCDC80
chr11	85566199	85566455	NM_001286159	220047	CCDC83
chr14	91864122	91864317	NM_001080414	440193	CCDC88C
chr11	83003938	83004129	NM_001286117	60492	CCDC90B
chr12	124393899	124394190	NM_001304959	80212	CCDC92
chr1	86094504	86094695	NM_001554	3491	CCN1
chr6	132236270	132236461	NM_001901	1490	CCN2
chr13	36994724	36994931	NM_001111046	8900	CCNA1
chr12	4230576	4230769	NM_001759	894	CCND2
chr12	4198417	4198613	NM_001759	894	CCND2
chr6	41978251	41978658	NM_001136017	896	CCND3
chr19	30305975	30306394	NM_001322259	898	CCNE1
chr4	78016600	78016791	NM_006835	10983	CCNI
chr17	38713419	38713648	NM_001301718	1236	CCR7
chr17	38712961	38713212	NM_001301718	1236	CCR7
chr10	86444532	86444749	NM_001284242	54462	CCSER2
chr10	86087865	86088152	NM_001284240	54462	CCSER2
chr5	66511302	66511796	NM_005582	4064	CD180
chr1	117280129	117280376	NM_001767	914	CD2
chr1	167499268	167499459	NM_198053	919	CD247
chr12	6539629	6539897	NM_001242	939	CD27
chr15	73978385	73978810	NM_001329628	80381	CD276
chr17	72449907	72450098	NM_001330456	11314	CD300A
chr1	207926672	207926952	NM_172353	4179	CD46
chr1	207483162	207483353	NM_001300902	1604	CD55
chr5	149789600	149789908	NM_001364084	972	CD74
chr11	44655915	44656302	NM_002231	3732	CD82
chr2	107159392	107159676	NM_001368307	927	CD8B2
chr12	6339768	6339959	NM_001769	928	CD9
chr12	6276902	6277117	NM_001330312	928	CD9
chr13	49887943	49888217	NM_001193478	81602	CDADC1
chr1	227545467	227545750	NM_003607	8476	CDC42BPA
chr1	227619348	227619573	NM_003607	8476	CDC42BPA
chr22	37943169	37943516	NM_152243	11135	CDC42EP1
chr22	37948369	37948562	NM_152243	11135	CDC42EP1
chr1	54587093	54587357	NM_001353655	200008	CDCP2
chr16	68823982	68824262	NM_001317185	999	CDH1
chr16	64944428	64944707	NM_001330576	1009	CDH11
chr16	65151732	65152010	NM_001330576	1009	CDH11
chr16	82688415	82688644	NM_001257	1012	CDH13
chr16	82689408	82689619	NM_001257	1012	CDH13
chr10	73307914	73308106	NR_120672	102723377	CDH23-AS1
chr16	66304192	66304475	NM_001795	1003	CDH5
chr16	66369448	66369741	NM_001795	1003	CDH5
chr5	31193866	31194087	NM_001362435	1004	CDH6
chr5	26873225	26873441	NM_016279	1007	CDH9
chr7	105650175	105650499	NM_152750	222256	CDHR3
chr16	4572579	4572770	NM_001199054	29965	CDIP1
chr16	4572135	4572326	NM_001199054	29965	CDIP1
chr2	202671183	202671541	NM_001261436	65061	CDK15
chr2	202747120	202747331	NM_001261436	65061	CDK15
chr12	123755760	123756419	NM_004642	8099	CDK2AP1
chr17	73993177	73993478	NM_001258	1018	CDK3
chr17	30830944	30831624	NM_003885	8851	CDK5R1
chr17	46050185	46050376	NM_001278198	80279	CDK5RAP3
chr7	92350531	92350724	NM_001259	1021	CDK6
chr19	10687927	10688237	NM_079421	1032	CDKN2D
chr11	125974711	125974906	NM_001243597	50937	CDON
chr11	125993964	125994299	NM_001243597	50937	CDON
chr17	72983326	72983522	NM_014603	30850	CDR2L
chr17	13834388	13834731	NR_003261	94158	CDRT15P1
chr17	15361101	15361401	NM_001204477	284040	CDRT4
chr5	149543313	149543504	NM_001804	1044	CDX1
chr16	80837636	80837838	NM_152342	124359	CDYL2
chr8	48647723	48647946	NM_005195	1052	CEBPD
chr22	17745754	17746026	NR_038398	27442	CECR3
chr19	3275680	3275992	NR_033342	60680	CELF5
chr15	81071511	81071730	NM_001293304	57214	CEMIP
chr2	25050246	25050542	NM_001322101	79172	CENPO
chr2	25018251	25018442	NM_001322101	79172	CENPO
chr6	84968724	84969173	NM_014895	22832	CEP162
chr4	175178909	175179174	NM_001145314	80817	CEP44
chr3	134183020	134183394	NM_001042383	80254	CEP63
chr2	65267705	65267916	NM_001319100	23177	CEP68
chr6	119030354	119030551	NM_001178035	387119	CEP85L
chr2	182439001	182439220	NM_201548	375298	CERKL
chr19	19005269	19005460	NM_021267	10715	CERS1
chr15	81426225	81426472	NM_001353365	161502	CFAP161
chr2	219905361	219905552	NM_152389	255101	CFAP65
chr4	186123511	186123810	NM_001292033	57587	CFAP97
chr19	862938	863160	NM_001317335	1675	CFD
chr17	7788090	7788328	NM_001005271	1107	CHD3
chr12	6712783	6712974	NM_001297553	1108	CHD4
chr12	6723224	6723593	NM_001273	1108	CHD4
chr20	40633931	40634177	NM_032221	84181	CHD6
chr8	61652957	61653176	NM_001316690	55636	CHD7
chr14	93389616	93389829	NM_001275	1113	CHGA
chr1	241773342	241773533	NM_001821	1122	CHML
chr20	32415419	32415620	NM_176812	128866	CHMP4B
chr20	32417847	32418051	NM_176812	128866	CHMP4B
chr17	78977755	78977946	NM_024591	79643	CHMP6
chr2	175892927	175893279	NM_001025201	1123	CHN1
chr4	40337053	40337271	NM_017581	55584	CHRNA9
chr11	45687407	45687604	NM_003654	8534	CHST1
chr12	104775541	104775757	NM_018413	50515	CHST11
chr10	125781527	125781766	NM_015892	51363	CHST15
chr10	73759393	73759584	NM_004273	9469	CHST3
chr16	71558518	71558742	NM_005769	10164	CHST4
chr16	71558912	71559247	NM_005769	10164	CHST4
chrX	46509158	46509360	NM_019886	56548	CHST7
chr15	101724604	101724795	NM_014918	22856	CHSY1
chr15	101697035	101697272	NM_014918	22856	CHSY1
chr15	101740011	101740234	NM_014918	22856	CHSY1
chr15	101667963	101668269	NM_014918	22856	CHSY1
chr15	101741491	101741840	NM_014918	22856	CHSY1
chr15	101661692	101662226	NM_014918	22856	CHSY1
chr15	65503976	65504169	NM_003613	8483	CILP
chr19	1268826	1269022	NM_001280	1153	CIRBP
chr6	139660425	139660616	NM_001168389	10370	CITED2
chr11	46848095	46848365	NM_001008938	9793	CKAP5
chr5	80490763	80490954	NM_001099736	1160	CKMT2
chr5	80480523	80480882	NM_001099736	1160	CKMT2
chr14	105451736	105451954	NM_174891	122616	CLBA1
chrX	10142023	10142233	NM_001830	1183	CLCN4
chr13	96130967	96131177	NM_182848	9071	CLDN10
chr7	73237038	73237341	NM_001305	1364	CLDN4
chr1	25062098	25062405	NM_013943	25932	CLIC4
chr6	45983448	45983759	NM_016929	53405	CLIC5
chr6	45780784	45780979	NR_045672	53405	CLIC5
chr5	157546746	157546937	NM_001195556	9685	CLINT1
chr12	122885432	122885692	NR_045382	100507066	CLIP1-AS1
chr7	73694155	73694346	NM_032421	7461	CLIP2
chr7	73779537	73779764	NM_003388	7461	CLIP2
chr2	29331208	29331426	NR_109844	79745	CLIP4
chr14	95783336	95783571	NM_024734	79789	CLMN
chr14	95732098	95732420	NM_024734	79789	CLMN
chr11	123132133	123132367	NM_024769	79827	CLMP
chr11	123008610	123008816	NM_024769	79827	CLMP
chr11	72090275	72090553	NM_030813	81570	CLPB
chr11	72182205	72182444	NM_001258394	81570	CLPB
chr1	9852679	9852890	NM_014944	22883	CLSTN1
chr8	27471996	27472351	NM_001831	1191	CLU
chr16	66685134	66685346	NM_181521	146223	CMTM4
chr1	224691040	224691245	NR_136292	149111	CNIH3
chr6	154936951	154937207	NM_001368117	154043	CNKSR3
chr6	154837341	154837549	NM_001368117	154043	CNKSR3
chr19	11649345	11649536	NM_001308342	1264	CNN1
chr19	11649717	11650007	NM_001308341	1264	CNN1
chr6	88978214	88978532	NM_001370546	1268	CNR1
chr9	34554844	34555067	NR_024369	415056	CNTFR-AS1
chr10	71517669	71517860	NM_001368882	1305	COL13A1
chr9	101705824	101706138	NM_001855	1306	COL15A1
chr9	101745796	101746027	NM_001855	1306	COL15A1
chr17	48277348	48277567	NM_000088	1277	COL1A1
chr7	93930565	93930798	NR_147206	101927525	COL1A2-AS1
chr6	56234981	56235219	NM_001318752	81578	COL21A1
chr6	56194352	56194543	NM_001318752	81578	COL21A1
chr4	110127945	110128140	NM_032518	84570	COL25A1
chr7	101021914	101022284	NM_001278563	136227	COL26A1
chr12	48431477	48431705	NM_001844	1280	COL2A1
chr9	137494464	137494895	NM_000093	1289	COL5A1
chr2	238330392	238330583	NM_057167	1293	COL6A3
chr1	183994227	183994422	NM_001303421	23127	COLGALT2
chr11	36302923	36303219	NM_001101653	29099	COMMD9
chr11	36217309	36217550	NM_001101653	29099	COMMD9
chr19	18901098	18901309	NM_000095	1311	COMP
chr2	238079971	238080266	NM_006710	10920	COPS8
chr15	68966280	68966553	NM_001324015	10391	CORO2B
chr20	30266837	30267184	NM_032609	84701	COX4I2
chr20	30249269	30249500	NM_032609	84701	COX4I2
chr15	75230639	75230884	NM_004255	9377	COX5A
chr19	55865737	55865928	NM_001369800	125965	COX6B2
chr11	63741550	63741867	NM_004074	1351	COX8A
chr7	129992373	129992570	NM_001127441	93979	CPA5
chr3	148533693	148533908	NM_001871	1360	CPB1
chr3	131753632	131753823	NM_130808	131034	CPNE4
chr8	97924035	97924280	NM_016134	10404	CPQ
chr2	212216756	212216947	NR_002763	29034	CPS1-IT1
chr1	53651305	53651602	NM_000098	1376	CPT2
chr15	78614552	78615060	NM_004378	1381	CRABP1
chr7	65565337	65565586	NM_001142414	27297	CRCP
chr11	46299122	46299407	NM_052854	90993	CREB3L1
chr11	46299628	46299922	NM_052854	90993	CREB3L1
chr7	28340950	28341141	NM_182899	9586	CREB5
chr7	28771873	28772130	NM_001011666	9586	CREB5
chr7	28833343	28833541	NM_001011666	9586	CREB5
chr16	3930243	3930479	NM_001079846	1387	CREBBP
chr22	50331425	50331718	NM_001135101	79174	CRELD2
chr10	35501662	35502044	NM_182724	1390	CREM
chr2	36598200	36598391	NM_016441	51232	CRIM1
chr16	84911952	84912171	NM_031476	83716	CRISPLD2
chr17	1359744	1360037	NM_005206	1398	CRK
chr4	5890382	5890845	NM_001313	1400	CRMP1
chr19	18788745	18788965	NM_015321	23373	CRTC1
chr21	44615225	44615541	NM_001363766	1409	CRYAA
chr22	25632070	25632270	NM_000496	1415	CRYBB2
chr15	76005258	76005553	NM_001897	1464	CSPG4
chr3	39195242	39195473	NM_033027	64651	CSRNP1
chr11	19240239	19240567	NM_001369404	8048	CSRP3
chr20	23870316	23870559	NM_001900	1473	CST5
chrX	134312081	134312550	NM_001031705	54967	CT55
chr7	69030044	69030247	NR_108105	100507468	CT66
chr10	126919880	126920128	NM_001083914	1488	CTBP2
chr5	2038724	2038915	NR_109912	101929081	CTD-2194D22.4
chr5	1174357	1174624	NR_109911	101928857	CTD-3080P12.3
chr12	58230908	58231099	NM_005730	10106	CTDSP2
chr2	204679866	204680183	NM_001037631	1493	CTLA4
chr3	41159109	41159355	NM_001098209	1499	CTNNB1
chr1	9935121	9935337	NM_001012329	56998	CTNNBIP1
chr4	157031431	157031754	NM_001334	1519	CTSO
chr1	150737091	150737282	NM_004079	1520	CTSS
chr10	17071732	17072002	NM_001081	8029	CUBN
chr13	113842172	113842410	NM_001278513	8451	CUL4A
chr7	101544997	101545401	NM_181552	1523	CUX1
chr7	101513139	101513330	NM_181552	1523	CUX1
chr10	124608149	124608340	NR_037912	50624	CUZD1
chr10	44882218	44882413	NM_000609	6387	CXCL12
chr10	44847633	44847824	NM_001033886	6387	CXCL12
chr4	78540070	78540282	NM_006419	10563	CXCL13
chr2	136883569	136883857	NM_003467	7852	CXCR4
chrX	145989328	145989554	NM_001244892	100133053	CXorf51B
chr5	139032457	139033478	NM_001317205	51523	CXXC5
chr5	139033729	139033926	NM_001317205	51523	CXXC5
chr5	139056227	139056486	NM_001317208	51523	CXXC5
chr5	139049269	139049526	NM_001317210	51523	CXXC5
chr1	202933650	202933857	NM_016243	51706	CYB5R1
chr2	172339799	172340029	NM_001256909	79901	CYBRD1
chr7	25133794	25134122	NM_018947	54205	CYCS
chr15	75017662	75017868	NM_001319216	1543	CYP1A1
chr2	127951382	127951579	NM_001001665	339761	CYP27C1
chr2	127984295	127984571	NM_001367501	339761	CYP27C1
chr1	60436910	60437541	NR_134982	1573	CYP2J2
chr2	10220446	10220737	NM_001037160	192668	CYS1
chr22	37663265	37663567	NM_001318024	27128	CYTH4
chr9	124308490	124308728	NM_032552	153090	DAB2IP
chr3	49509177	49509537	NM_001177638	1605	DAG1
chr13	105223882	105224273	NM_001161814	267012	DAOA
chr19	3971367	3971558	NM_001348	1613	DAPK3
chr19	49137465	49137762	NM_001352	1628	DBP
chr11	20213508	20213699	NM_001029865	120237	DBX1
chr11	20180094	20180338	NM_001029865	120237	DBX1
chr13	36675420	36675665	NM_001330071	9201	DCLK1
chr5	112399239	112399674	NM_001242377	167227	DCP2
chr4	183522207	183522414	NM_001351743	1635	DCTD
chr5	150136903	150137097	NM_001135644	51164	DCTN4
chrX	110592478	110592723	NM_000555	1641	DCX
chrX	110654923	110655160	NM_001369374	1641	DCX
chr19	17419870	17420148	NM_024050	79016	DDA1
chr1	85844843	85845092	NM_001330655	23576	DDAH1
chr10	74014798	74014991	NM_019058	54541	DDIT4
chr12	49389030	49389236	NR_147179	105369758	DDN-AS1
chr1	162600593	162600972	NM_001354983	4921	DDR2
chr12	31231550	31231746	NM_001257144	1663	DDX11
chr10	70630955	70631146	NM_024045	79009	DDX50
chr11	706592	706936	NM_001367390	10522	DEAF1
chr11	726296	726521	NM_001367390	10522	DEAF1
chr20	30048055	30048405	NM_001037500	245937	DEFB124
chr20	118324	118609	NM_030931	81623	DEFB126
chr14	100658939	100659236	NM_206918	123099	DEGS2
chr10	120861415	120861647	NR_130122	404636	DENND10
chr8	142174540	142175102	NM_001352891	22898	DENND3
chr12	56333925	56334155	NM_001351037	1606	DGKA
chr11	46385530	46385721	NM_001105540	8525	DGKZ
chr14	91561394	91561759	NM_001286470	80017	DGLUCY
chr12	49485832	49486184	NM_021044	50846	DHH
chr13	52389207	52389674	NM_001031719	79758	DHRS12
chr14	95581061	95581252	NM_001195573	23405	DICER1
chr14	95666757	95666977	NM_001291628	23405	DICER1
chr6	36646041	36646289	NR_144384	108783646	DINOL
chr10	830662	830899	NM_014974	22982	DIP2C
chrX	45046348	45046661	NM_024689	79742	DIPK2B
chr1	68582569	68582785	NM_004675	9077	DIRAS3
chr2	218113287	218113563	NR_133642	105373877	DIRC3-AS1
chr6	163759974	163760165	NR_033862	401282	DKFZp451B082
chr6	163776263	163776537	NR_033862	401282	DKFZp451B082
chr11	11998336	11998571	NM_001018057	27122	DKK3
chr13	50950129	50950337	NR_125753	103689915	DLEU1-AS1
chr10	79730989	79731293	NR_024585	100128292	DLG5-AS1
chr18	3771607	3771805	NM_001003809	9229	DLGAP1
chr2	173037408	173037635	NR_126376	104326193	DLX2-DT
chr17	48075842	48076096	NM_005220	1747	DLX3
chr1	46985984	46986231	NM_147192	127343	DMBX1
chrX	31283581	31283783	NM_004017	1756	DMD
chr9	894009	894234	NM_001363767	1761	DMRT1
chr9	1009332	1009579	NM_021240	58524	DMRT3
chr9	935893	936087	NM_021240	58524	DMRT3
chr1	50798895	50799271	NM_032110	63950	DMRTA2
chr17	11511598	11511849	NM_001372	1770	DNAH9
chr16	4476901	4477100	NM_001135110	9093	DNAJA3
chr10	74091423	74091786	NM_001365080	54788	DNAJB12
chr10	74123889	74124373	NM_001002762	54788	DNAJB12
chr10	74095068	74095374	NM_001365080	54788	DNAJB12
chr9	34993682	34993880	NM_001135005	25822	DNAJB5
chr3	128151657	128151947	NR_037890	285224	DNAJB8-AS1
chr1	6760383	6760661	NM_018198	55735	DNAJC11
chr19	12978560	12978831	NM_001375	1777	DNASE2
chr19	12992044	12992698	NM_001375	1777	DNASE2
chr2	230451501	230451827	NM_139072	92737	DNER
chr2	230579938	230580129	NM_139072	92737	DNER
chr20	31384031	31384227	NM_175850	1789	DNMT3B
chrX	117629085	117629339	NM_144658	139818	DOCK11
chr8	25072143	25072334	NM_024940	80005	DOCK5
chr2	74812525	74812815	NM_001318867	1796	DOK1
chr16	57513392	57514078	NM_001369621	55715	DOK4
chr4	3464904	3465183	NM_001164673	285489	DOK7
chr11	65097340	65097551	NM_006268	5977	DPF2
chr7	32708962	32709159	NR_036680	100129460	DPY19L1P1
chr1	11751758	11752158	NM_198545	374946	DRAXIN
chr6	56767307	56767552	NM_001144770	667	DST
chr18	32171922	32172213	NM_001198939	1837	DTNA
chr6	15691769	15692045	NM_032122	84062	DTNBP1
chr19	5804634	5804910	NM_001161619	56931	DUS3L
chr10	76859979	76860180	NM_016364	51207	DUSP13
chr20	30448301	30448492	NM_177991	128853	DUSP15
chr2	96812418	96812651	NM_004418	1844	DUSP2
chr8	29230984	29231202	NM_001394	1846	DUSP4
chr8	29316887	29317249	NM_001394	1846	DUSP4
chr10	112289994	112290199	NM_004419	1847	DUSP5
chr11	103196599	103196828	NM_001377	79659	DYNC2H1
chr2	71944403	71944616	NM_001130986	8291	DYSF
chr2	71943741	71944009	NM_001130986	8291	DYSF
chr2	71858632	71859040	NM_001130986	8291	DYSF
chr2	71918844	71919297	NM_001130986	8291	DYSF
chr1	21580971	21581168	NM_001113347	1889	ECE1
chr2	233352127	233352389	NM_001290787	9427	ECEL1
chr9	114247254	114247471	NM_001363756	23392	ECPAS
chr2	109526800	109526993	NM_022336	10913	EDAR
chr1	41901534	41901815	NM_001302269	1907	EDN2
chr1	41898257	41898533	NM_001302269	1907	EDN2
chr20	57910475	57910689	NM_207033	1908	EDN3
chr11	85904502	85904793	NM_001308007	8726	EED
chr19	3987699	3987936	NM_001961	1938	EEF2
chr8	49701276	49701573	NR_157026	79645	EFCAB1
chr17	45439763	45440012	NM_001195192	124989	EFCAB13
chr6	52288491	52288809	NM_001172420	114327	EFHC1
chr1	155034292	155034487	NM_182689	1945	EFNA4
chr5	106837696	106837940	NM_001962	1946	EFNA5
chr5	106888944	106889228	NM_001962	1946	EFNA5
chr5	106790748	106790939	NM_001962	1946	EFNA5
chrX	68047797	68048129	NM_004429	1947	EFNB1
chrX	68051162	68051353	NM_004429	1947	EFNB1
chr7	55132907	55133115	NM_001346900	1956	EGFR
chr14	34609068	34609487	NM_001308103	112399	EGLN3
chr3	4867820	4868139	NR_004428	100126791	EGOT
chr15	42221165	42221424	NR_120332	101928363	EHD4-AS1
chr11	34607509	34607703	NM_001206615	26298	EHF
chr20	32717398	32717629	NM_001316364	8894	EIF2S2
chr11	10827859	10828093	NM_001172705	1982	EIF4G2
chr3	170626601	170626877	NM_020390	56648	EIF5A2
chr19	8067162	8067373	NM_001419	1994	ELAVL1
chr13	41567283	41567669	NM_001370331	1997	ELF1
chr22	37822298	37822533	NR_110512	114794	ELFN2
chr19	18633452	18633643	NM_006532	8178	ELL
chr7	37389590	37389781	NM_001206482	9844	ELMO1
chr7	73400612	73401098	NM_001278918	2006	ELN
chr19	50969913	50970260	NM_206538	284361	EMC10
chr22	29540749	29540953	NM_133455	129080	EMID1
chr2	27304310	27304585	NM_007046	11117	EMILIN1
chr14	100259729	100259949	NM_004434	2009	EML1
chr2	42356050	42356494	NM_019063	27436	EML4
chr14	89258131	89258322	NM_183387	161436	EML5
chr2	54893986	54894216	NM_001039753	400954	EML6
chr12	13332573	13332851	NM_001423	2012	EMP1
chr1	225843506	225843705	NM_001008493	55740	ENAH
chr10	25356933	25357372	NM_001270383	219670	ENKUR
chr1	8950187	8950389	NR_038351	100505975	ENO1-AS1
chr18	712749	713020	NR_148706	55556	ENOSF1
chr13	43882269	43882487	NR_120399	100874130	ENOX1-AS2
chr8	23309112	23309303	NM_004901	9583	ENTPD4
chr18	5477377	5477568	NM_001281533	23136	EPB41L3
chr9	112027351	112027644	NM_018424	54566	EPB41L4B
chr3	90231530	90231836	NM_182644	2042	EPHA3
chr2	221968928	221969363	NM_001363748	2043	EPHA4
chr19	15362340	15362673	NM_001142886	79852	EPHX3
chr19	15361640	15361938	NM_001142886	79852	EPHX3
chr17	19206671	19206894	NR_048576	100874018	EPN2-AS1
chr1	51985120	51985359	NM_001981	2060	EPS15
chr19	55591386	55591649	NM_017729	54869	EPS8L1
chr1	110334648	110335174	NM_024526	79574	EPS8L3
chr2	128050219	128050442	NM_001303418	2071	ERCC3
chr16	13875642	13875833	NM_005236	2072	ERCC4
chr19	42755142	42755335	NM_001308402	2077	ERF
chr14	76102900	76103192	NM_007176	11161	ERG28
chr19	41955170	41955367	NM_001130514	100170765	ERICH4
chr17	62207705	62207936	NM_001433	2081	ERN1
chr1	8108268	8108459	NM_018948	54206	ERRFI1
chr1	8065085	8065312	NM_018948	54206	ERRFI1
chr5	54178879	54179070	NM_007036	11082	ESM1
chr5	54179277	54179468	NM_007036	11082	ESM1
chr6	152002803	152003029	NM_001122742	2099	ESR1
chr14	76819033	76819224	NM_004452	2103	ESRRB
chr19	44029701	44029933	NM_001320868	23474	ETHE1
chr11	128294772	128295022	NM_001330451	2113	ETS1
chr1	157043858	157044090	NM_001004341	440695	ETV3L
chr17	41668772	41669207	NM_001079675	2118	ETV4
chr12	11949247	11949438	NM_001987	2120	ETV6
chr1	36816884	36817189	NM_018166	55194	EVA1B
chr4	5712042	5712233	NM_001306092	2121	EVC
chr2	176952895	176953184	NM_001080458	344191	EVX2
chr15	69351314	69351505	NR_026949	283673	EWSAT1
chr15	69375349	69375549	NR_026949	283673	EWSAT1
chr4	56708071	56708341	NM_001024924	55763	EXOC1
chr14	57524947	57525138	NM_006544	10640	EXOC5
chr20	45498490	45498856	NM_172110	2139	EYA2
chr6	133756415	133756744	NM_001301013	2070	EYA4
chr6	133717860	133718232	NM_001301013	2070	EYA4
chr6	159220262	159220466	NR_102425	101409257	EZR-AS1
chr1	160983340	160983571	NM_001348091	50848	F11R
chr1	46872185	46872748	NM_001441	2166	FAAH
chr1	2120781	2120982	NM_182533	199990	FAAP20
chr11	61652919	61653249	NM_021727	3995	FADS3
chr12	50297542	50297750	NM_012306	23017	FAIM2
chr10	14646121	14646321	NM_001282697	83641	FAM107B
chr20	829197	829405	NM_031424	83541	FAM110A
chr8	58906580	58906887	NM_147189	90362	FAM110B
chr8	58912603	58912794	NM_147189	90362	FAM110B
chr22	45714251	45714488	NM_001349913	55007	FAM118A
chr1	16400228	16400449	NM_182623	348487	FAM131C
chr7	92329713	92330012	NR_109929	257415	FAM133B
chr10	61043398	61043805	NM_198215	220965	FAM13C
chr4	187079408	187079599	NM_015398	25854	FAM149A
chr5	79789240	79789432	NM_205548	167555	FAM151B
chrX	68583184	68583432	NM_015686	27112	FAM155B
chr15	93210657	93210848	NM_207446	400451	FAM174B
chr1	43533589	43533950	NM_001101376	440585	FAM183A
chr1	43534142	43534365	NM_001101376	440585	FAM183A
chr17	42984738	42985229	NM_001258400	100528020	FAM187A
chr9	71991636	71991910	NM_004816	9413	FAM189A2
chr4	15692895	15693124	NM_001145191	285550	FAM200B
chr9	38687731	38688067	NR_027294	158228	FAM201A
chr7	194507	194817	NM_020223	56975	FAM20C
chr20	58508953	58509158	NM_001190826	63939	FAM217B
chr7	6357418	6357708	NM_001037163	84792	FAM220A
chr9	35826207	35826398	NR_052026	392307	FAM221B
chr12	110215487	110215779	NR_026662	84983	FAM222A-AS1
chr3	58674636	58674853	NM_138805	131177	FAM3D
chr3	58667051	58667242	NM_138805	131177	FAM3D
chrX	37003369	37003560	NM_001013736	442444	FAM47C
chr2	16813695	16813920	NM_030797	81553	FAM49A
chr8	130896561	130896871	NM_001353244	51571	FAM49B
chr6	3849126	3849319	NM_012135	26240	FAM50B
chr4	1581073	1581353	NM_001013622	152877	FAM53A
chr15	59739423	59739614	NM_152450	145773	FAM81A
chr20	33906336	33906560	NM_178468	128876	FAM83C
chr8	144827014	144827270	NR_033849	100128338	FAM83H-AS1
chr4	3957418	3957635	NR_130741	348926	FAM86EP
chr11	65341424	65341656	NM_001098785	23625	FAM89B
chr16	85148751	85148942	NM_001366920	339145	FAM92B
chr11	1676957	1677212	NR_026643	387742	FAM99A
chrX	13047671	13047884	NM_174901	171484	FAM9C
chr13	98794972	98795211	NM_001286839	10160	FARP1
chr4	187649233	187649428	NM_005245	2195	FAT1
chr4	187686335	187686721	NM_005245	2195	FAT1
chr5	150972603	150972900	NM_001447	2196	FAT2
chr19	40334801	40335012	NM_001436	2091	FBL
chr1	16087163	16087602	NM_017556	54751	FBLIM1
chr16	756023	756237	NM_153350	146330	FBXL16
chr3	33319643	33319868	NR_146134	25827	FBXL2
chr11	33800137	33800448	NR_120550	101928440	FBXO3-DT
chr2	73493634	73493941	NM_001080410	150726	FBXO41
chr4	153273716	153273951	NM_018315	55294	FBXW7
chr16	86478030	86478228	NR_036444	400550	FENDRR
chr16	86525021	86525501	NR_036444	400550	FENDRR
chr10	95314795	95315058	NM_001195755	338557	FFAR4
chr5	141980218	141980468	NM_001144892	2246	FGF1
chrX	138284677	138284872	NM_001139500	2258	FGF13
chr5	170921510	170922093	NM_003862	8817	FGF18
chr5	170864455	170864780	NM_003862	8817	FGF18
chr4	1768864	1769058	NR_148971	2261	FGFR3
chr5	176522668	176522894	NM_022963	2264	FGFR4
chr1	15598928	15599119	NM_052929	114827	FHAD1
chrX	135292606	135292928	NM_001369331	2273	FHL1
chr6	76234213	76234433	NM_015687	27145	FILIP1
chr12	2893142	2893333	NM_002014	2288	FKBP4
chr6	35656898	35657112	NM_004117	2289	FKBP5
chr8	102120953	102121145	NR_033962	441374	FLJ42969
chr3	58163659	58163864	NR_135534	105377105	FLNB-AS1
chr16	2956105	2956347	NM_020912	84256	FLYWCH1
chr16	2976937	2977220	NM_032296	84256	FLYWCH1
chr17	43306163	43306553	NM_005892	752	FMNL1
chr1	171189655	171190163	NM_001282694	2326	FMO1
chr1	171283167	171283359	NM_002022	2329	FMO4
chrX	146998240	146998607	NM_001185075	2332	FMR1
chr6	159584806	159585022	NM_032532	84624	FNDC1
chr3	171858280	171858496	NM_001135095	64778	FNDC3B
chr2	28578240	28578472	NM_005253	2355	FOSL2
chr14	38016018	38016231	NM_004496	3169	FOXA1
chr15	60298670	60298876	NM_012182	27023	FOXB1
chr6	1604488	1604697	NR_125804	101927703	FOXCUT
chr5	72747354	72747555	NM_004472	2297	FOXD1
chr7	4764503	4764962	NM_001037165	221937	FOXK1
chr2	48477067	48477262	NM_002158	3344	FOXN2
chr14	89672707	89672898	NM_005197	1112	FOXN3
chr12	109747307	109747535	NM_213596	121643	FOXN4
chr6	108863099	108863290	NM_201559	2309	FOXO3
chr3	71247770	71248023	NM_001244814	27086	FOXP1
chr3	71115376	71115759	NM_001349344	27086	FOXP1
chr10	99079512	99079807	NM_005479	10023	FRAT1
chr9	14768464	14768696	NM_001177704	158326	FREM1
chr21	44573892	44574490	NR_133677	106481742	FRGCA
chr9	85900741	85901055	NM_001244962	257019	FRMD3
chr10	13760372	13760616	NM_001318338	55691	FRMD4A
chr10	14052434	14052653	NM_001318336	55691	FRMD4A
chr10	13759953	13760229	NM_001318338	55691	FRMD4A
chr14	52006327	52006601	NM_001042481	122786	FRMD6
chr14	52105019	52105314	NR_037676	145438	FRMD6-AS1
chr14	52021712	52021903	NR_051990	100874185	FRMD6-AS2
chr1	100271244	100271513	NM_001361041	391059	FRRS1
chr13	32738664	32738855	NM_023037	10129	FRY
chr7	5638712	5638939	NM_003088	6624	FSCN1
chr7	5631068	5631337	NM_003088	6624	FSCN1
chr17	79504514	79504831	NM_001077182	25794	FSCN2
chr3	120151572	120151796	NM_007085	11167	FSTL1
chr5	132947662	132947942	NM_015082	23105	FSTL4
chr6	112031288	112031499	NM_153048	2534	FYN
chr7	72850285	72850937	NM_003508	8326	FZD9
chr15	27018476	27018851	NM_021912	2562	GABRB3
chr5	170171386	170171599	NM_001291985	2568	GABRP
chr5	170171752	170171947	NM_001291985	2568	GABRP
chr2	16159006	16159376	NR_126559	104797537	GACAT3
chr2	16437986	16438177	NR_126559	104797537	GACAT3
chr10	26524839	26525030	NM_001134366	2572	GAD2
chr19	2525180	2525376	NM_015675	4616	GADD45B
chr19	2507153	2507437	NM_015675	4616	GADD45B
chr19	2546552	2546874	NM_015675	4616	GADD45B
chr19	2543422	2543631	NM_015675	4616	GADD45B
chr3	31045408	31045601	NM_207359	339896	GADL1
chr9	101611195	101611463	NM_024642	79695	GALNT12
chr2	158113943	158114389	NM_001329868	11227	GALNT5
chr4	173946078	173946289	NM_017423	51809	GALNT7
chr4	173697077	173697289	NR_125894	101928314	GALNTL6-AS1
chr9	128136876	128137154	NM_001282680	26130	GAPVD1
chr7	30590763	30591079	NR_038889	401320	GARS-DT
chr9	89356642	89356891	NM_002048	2619	GAS1
chr17	10018182	10018494	NM_201432	8522	GAS7
chr8	103803443	103803659	NR_149020	401472	GASAL1
chr8	11550034	11550278	NM_002052	2626	GATA4
chr19	19510941	19511187	NM_017660	54815	GATAD2A
chr15	45623842	45624038	NM_001482	2628	GATM
chr1	94445517	94446193	NM_001308253	2730	GCLM
chr15	57848127	57848318	NR_104371	145781	GCOM1
chr10	5882403	5882643	NM_001115156	2665	GDI2
chr5	37666111	37666359	NM_001278098	2668	GDNF
chr6	13488019	13488314	NM_001242629	54438	GFOD1
chr6	33553598	33553866	NR_028361	449520	GGNBP1
chr22	23023858	23024064	NM_199127	91227	GGTLC2
chr5	42518632	42518972	NM_001242402	2690	GHR
chr16	85730694	85730973	NM_016095	51659	GINS2
chr6	90661445	90661813	NM_032602	84694	GJA10
chr13	20748994	20749497	NM_021954	2700	GJA3
chr15	35012739	35012930	NM_020660	57369	GJD2
chr4	80366531	80366730	NM_033214	2712	GK2
chr9	86432949	86433142	NM_001135953	80318	GKAP1
chr2	69170867	69171062	NM_182536	200504	GKN2
chr9	6552514	6552735	NM_000170	2731	GLDC
chr9	131285662	131285870	NM_001499	2733	GLE1
chr2	121673501	121673758	NM_005270	2736	GLI2
chr16	4344107	4344403	NM_001318918	84662	GLIS2
chr9	4293744	4293943	NM_001042413	169792	GLIS3
chr9	4084444	4084804	NM_152629	169792	GLIS3
chr9	3963753	3963944	NR_026663	84850	GLIS3-AS1
chr4	158016972	158017163	NM_001166060	2743	GLRB
chr2	191683951	191684240	NM_001256310	2744	GLS
chr2	191684419	191684675	NM_001256310	2744	GLS
chr12	56890687	56890901	NM_001280797	27165	GLS2
chr6	16322965	16323342	NM_006877	2766	GMPR
chr7	2932586	2932868	NM_007353	2768	GNA12
chr7	2910134	2910361	NM_007353	2768	GNA12
chr7	2934024	2934394	NM_007353	2768	GNA12
chr7	2842266	2842922	NM_001282441	2768	GNA12
chr19	3142107	3142376	NM_002068	2769	GNA15
chr19	3133210	3133541	NM_002068	2769	GNA15
chr3	50280542	50280733	NM_001166425	2771	GNAI2
chr18	11752405	11752834	NM_001369387	2774	GNAL
chr1	68232047	68232252	NR_040077	100289178	GNG12-AS1
chr1	235813686	235813942	NM_004485	2786	GNG4
chr12	65085147	65085575	NM_002076	2799	GNS
chr15	85840015	85840245	NM_001310153	100133220	GOLGA6L3
chr17	45021007	45021593	NR_148349	9570	GOSR2
chr1	167028253	167028784	NM_005814	10223	GPA33
chr1	167036069	167036294	NM_005814	10223	GPA33
chr13	45621248	45621449	NM_018559	55425	GPALPP1
chr19	33568779	33569018	NR_135270	55094	GPATCH1
chr5	56594463	56594703	NM_001127236	65056	GPBP1
chr2	241326824	241327231	NM_002081	2817	GPC1
chr7	1121826	1122017	NM_001039966	2852	GPER1
chr7	1140246	1140548	NM_001098201	2852	GPER1
chr4	176923562	176923791	NM_201592	2823	GPM6A
chr13	27284349	27284684	NM_005288	2835	GPR12
chr13	27334107	27334558	NM_005288	2835	GPR12
chr14	105536424	105536615	NM_001278696	29933	GPR132
chr5	94956044	94956407	NM_199243	285601	GPR150
chr1	6336117	6336564	NM_207370	387509	GPR153
chr13	95253623	95253834	NM_180989	160897	GPR180
chr14	91719908	91720165	NM_001348437	8111	GPR68
chr4	8533778	8533992	NR_045511	27201	GPR78
chr4	8546613	8546878	NR_045511	27201	GPR78
chr12	54768131	54768332	NM_020370	53831	GPR84
chr11	123321660	123321873	NM_001354837	57476	GRAMD1B
chr11	123325028	123325238	NM_001354837	57476	GRAMD1B
chr12	52403788	52403992	NM_001271856	160622	GRASP
chr7	51006554	51006859	NM_001001555	2887	GRB10
chr18	18821752	18822027	NM_001142966	80000	GREB1L
chr7	2491257	2491481	NM_001291784	402635	GRIFIN
chr19	48903631	48903822	NM_000836	2906	GRIN2D
chr19	1000321	1000512	NM_138690	116444	GRIN3B
chr3	14513828	14514446	NM_001080423	80852	GRIP2
chr11	67033588	67033779	NM_001619	156	GRK2
chr22	25979361	25979584	NM_001362778	157	GRK3
chr3	7546944	7547295	NR_046606	100873937	GRM7-AS1
chr13	114018084	114018389	NM_024719	79774	GRTP1
chr14	95403632	95403862	NR_144432	108868751	GSC-DT
chr16	85586603	85586802	NM_001134473	23199	GSE1
chr16	85558682	85558902	NM_001134473	23199	GSE1
chr16	85619826	85620017	NM_001134473	23199	GSE1
chr16	85603201	85603421	NM_001134473	23199	GSE1
chr9	124048868	124049411	NM_001258030	2934	GSN
chr10	106051017	106051290	NM_001191014	119391	GSTO2
chr4	54967154	54967345	NM_133267	170825	GSX2
chr7	74042414	74042647	NM_001280800	2969	GTF2I
chr7	74057714	74058002	NM_001280800	2969	GTF2I
chr7	73925522	73925713	NM_005685	9569	GTF2IRD1
chr7	73894941	73895283	NM_005685	9569	GTF2IRD1
chr7	73843857	73844063	NM_001199207	9569	GTF2IRD1
chr13	27979547	27979738	NM_002097	2971	GTF3A
chr13	27977714	27978121	NM_002097	2971	GTF3A
chr13	27979884	27980075	NM_002097	2971	GTF3A
chr20	42373878	42374126	NM_001008901	149699	GTSF1L
chr1	42631276	42631582	NM_033553	2980	GUCA2A
chr4	156588586	156588853	NM_001130684	2982	GUCY1A1
chr6	26866556	26866750	NR_003504	387036	GUSBP2
chr3	72939246	72939509	NM_001080393	727936	GXYLT2
chr4	145225078	145225269	NM_002099	2993	GYPA
chr2	127415348	127415843	NM_002101	2995	GYPC
chr14	25148007	25148322	NM_004131	3002	GZMB
chr11	118962833	118963140	NM_002105	3014	H2AFX
chr2	43055004	43055206	NM_012205	23498	HAAO
chr10	115214199	115214406	NM_001177660	3026	HABP2
chr6	104973567	104973758	NM_001321084	57531	HACE1
chr2	177042660	177043064	NR_110464	401022	HAGLR
chr17	3641295	3641670	NM_031965	83903	HASPIN
chr17	3633936	3634308	NM_031965	83903	HASPIN
chr4	2244101	2244395	NM_024511	79441	HAUS3
chrX	152736463	152736723	NM_017518	55559	HAUS7
chr19	610987	611237	NM_001194	610	HCN2
chr3	13507012	13507252	NR_046690	100874101	HDAC11-AS1
chr10	112936032	112936223	NR_159949	113633881	HEAT2
chr10	112921766	112921973	NR_159949	113633881	HEAT2
chr10	93350546	93350737	NR_024467	100188947	HECTD2-AS1
chr10	93373571	93373762	NR_024467	100188947	HECTD2-AS1
chr4	185942423	185942722	NM_001300782	391723	HELT
chr20	62219468	62219698	NM_001037335	85441	HELZ2
chr4	89520633	89520838	NM_014606	8916	HERC3
chr4	89377228	89377431	NM_016323	51191	HERC5
chr16	56970910	56971150	NM_014685	9709	HERPUD1
chr3	193884640	193884909	NM_005524	3280	HES1
chr1	6480606	6480848	NM_019089	54626	HES2
chr8	80677718	80678042	NM_001282851	23462	HEY1
chr1	40108875	40109067	NM_014571	26508	HEYL
chr1	222694774	222694965	NM_024746	79802	HHIPL2
chr1	222719492	222719683	NM_024746	79802	HHIPL2
chr1	222628630	222629004	NM_024746	79802	HHIPL2
chr19	46792353	46792569	NM_152795	64344	HIF3A
chr7	128094334	128094525	NM_001098786	29923	HILPDA
chr7	128094654	128094931	NM_001098786	29923	HILPDA
chr1	149817037	149817347	NM_003516	8337	HIST2H2AA3
chr6	12012176	12012374	NM_002114	3096	HIVEP1
chr6	143193111	143193302	NM_006734	3097	HIVEP2
chr2	234760699	234760917	NM_018410	55355	HJURP
chr1	145412886	145413077	NM_213653	148738	HJV
chr10	71122312	71122503	NM_000188	3098	HK1
chr20	30139728	30139961	NR_046853	100874042	HM13-AS1
chr9	133031166	133031508	NM_001291815	256158	HMCN2
chr9	133066185	133066388	NM_001291815	256158	HMCN2
chr12	66208271	66208466	NM_001300918	8091	HMGA2
chr12	66338599	66338790	NR_158984	100129940	HMGA2-AS1
chr22	35772856	35773298	NM_002133	3162	HMOX1
chr22	35767628	35767869	NM_002133	3162	HMOX1
chr18	61603631	61603930	NM_001123366	284293	HMSD
chr17	46575809	46576061	NM_002144	3211	HOXB1
chr17	46811666	46811898	NM_006361	10481	HOXB13
chr12	54378284	54378617	NM_017409	3226	HOXC10
chr2	10467083	10467284	NM_001258357	3241	HPCAL1
chr2	10425495	10425692	NM_002149	3241	HPCAL1
chr12	122297036	122297251	NM_002150	3242	HPD
chr11	529088	529360	NM_001130442	3265	HRAS
chr3	11267420	11267627	NM_001098211	3269	HRH1
chr12	117299076	117299296	NR_073189	8739	HRK
chr12	117319095	117319289	NR_073189	8739	HRK
chr2	20799889	20800093	NR_046836	100874343	HS1BP3-IT1
chr17	13654370	13654726	NM_006042	9955	HS3ST3A1
chr16	1979915	1980116	NM_001009606	64711	HS3ST6
chr2	129139065	129139376	NM_004807	9394	HS6ST1
chr2	129079215	129079449	NM_004807	9394	HS6ST1
chr2	129075201	129075507	NM_004807	9394	HS6ST1
chrX	132090029	132090247	NM_147175	90161	HS6ST2
chrX	131965451	131965695	NM_147175	90161	HS6ST2
chrX	132043065	132043516	NM_147175	90161	HS6ST2
chrX	131971386	131971578	NM_147175	90161	HS6ST2
chr18	77719973	77720164	NM_001136180	440498	HSBP1L1
chr9	98966066	98966459	NR_146524	105376162	HSD17B3-AS1
chr1	59622481	59622944	NR_027120	729467	HSD52
chr14	102551324	102551515	NM_005348	3320	HSP90AA1
chr20	3708061	3708501	NM_001318322	116835	HSPA12B
chr12	119618236	119618427	NM_014365	26353	HSPB8
chr17	40285485	40285686	NM_033194	94086	HSPB9
chr11	20324836	20325027	NM_006410	10553	HTATIP2
chr1	19991509	19991718	NM_000871	3362	HTR6
chr6	52908994	52909206	NM_016513	22858	ICK
chr2	204774754	204775043	NM_012092	29851	ICOS
chr1	23908010	23908212	NM_002167	3399	ID3
chr19	13283325	13283600	NM_004907	9592	IER2
chr19	13266678	13266897	NM_004907	9592	IER2
chr19	13282974	13283232	NM_004907	9592	IER2
chr1	181064816	181065031	NM_016545	51278	IER5
chr1	181063618	181063847	NM_016545	51278	IER5
chr1	181066555	181066765	NM_016545	51278	IER5
chr9	131929490	131929785	NM_203434	389792	IER5L
chr10	91061179	91061370	NM_001547	3433	IFIT2
chr11	1770060	1770289	NM_001170820	402778	IFITM10
chr11	327175	327600	NM_021034	10410	IFITM3
chr11	329315	329554	NM_021034	10410	IFITM3
chr21	34681010	34681222	NM_000629	3454	IFNAR1
chr12	68494631	68494838	NM_000619	3458	IFNG
chr12	110561726	110561958	NM_001143779	28981	IFT81
chr12	110545891	110546109	NM_001143779	28981	IFT81
chr15	65668640	65668860	NM_004884	9543	IGDCC3
chr11	2172848	2173308	NM_001007139	3481	IGF2
chr17	47090322	47090652	NM_006546	10642	IGF2BP1
chr17	47094384	47094586	NM_006546	10642	IGF2BP1
chr17	47093592	47094094	NM_006546	10642	IGF2BP1
chr7	46184635	46184840	NM_000598	3486	IGFBP3
chr7	46172780	46173038	NM_000598	3486	IGFBP3
chr7	46013479	46013752	NM_000598	3486	IGFBP3
chr7	45957414	45957746	NM_001013398	3486	IGFBP3
chr1	18464808	18465038	NM_032880	84966	IGSF21
chr19	18169125	18169580	NM_001290023	3594	IL12RB1
chr1	67833440	67833698	NM_001258215	3595	IL12RB2
chr3	136732833	136733065	NM_144717	53833	IL20RB
chr3	136978103	136978294	NM_144717	53833	IL20RB
chr16	27438755	27439063	NM_021798	50615	IL21R
chr16	27481862	27482053	NR_037158	283888	IL21R-AS1
chr16	27337937	27338240	NM_001257997	3566	IL4R
chr7	128046473	128046664	NM_001142573	3614	IMPDH1
chr7	128046128	128046352	NM_001142573	3614	IMPDH1
chr19	47792802	47793175	NM_178511	255783	INAFM1
chr15	40615610	40615816	NM_001301268	100505573	INAFM2
chr15	40615302	40615527	NM_001301268	100505573	INAFM2
chr7	41956105	41956296	NM_002192	3624	INHBA
chr12	57848551	57848770	NM_031479	83729	INHBE
chr2	206750204	206750395	NM_017759	54891	INO80D
chr2	99082509	99082700	NM_001351426	3631	INPP4A
chr10	121545627	121545818	NM_001243194	22876	INPP5F
chr7	155006262	155006597	NM_198337	3638	INSIG1
chr9	5263542	5263792	NM_002195	3641	INSL4
chr20	20354348	20354654	NM_002196	3642	INSM1
chr5	169407528	169407729	NM_001346304	100131897	INSYN2B
chr12	30449380	30449632	NM_001190995	10526	IPO8
chr3	13012012	13012388	NM_014869	9922	IQSEC1
chr3	13036714	13036927	NM_001330619	9922	IQSEC1
chr3	13006759	13007265	NM_014869	9922	IQSEC1
chr19	46379918	46380228	NM_015649	26145	IRF2BP1
chr14	24630056	24630260	NM_006084	10379	IRF9
chr2	227624064	227624279	NM_005544	3667	IRS1
chr13	110438790	110438985	NM_003749	8660	IRS2
chr2	173150300	173150497	NM_001316306	3655	ITGA6
chr3	37794404	37794595	NR_110532	101928153	ITGA9-AS1
chr16	31415783	31416017	NM_001318185	3681	ITGAD
chr3	124531270	124531525	NM_002213	3693	ITGB5
chr3	124620025	124620332	NM_001354766	3693	ITGB5
chr10	7709264	7709520	NM_001001851	80760	ITIH5
chr1	226971229	226971454	NM_002221	3707	ITPKB
chr1	226851879	226852287	NR_103784	100506443	ITPKB-IT1
chr12	27006746	27006937	NM_002223	3709	ITPR2
chr10	106077133	106077410	NR_120622	101927472	ITPRIP-AS1
chr16	19142386	19142717	NR_028028	162073	ITPRIPL2
chr5	146934077	146934332	NR_038902	153469	JAKMIP2-AS1
chr11	133920577	133920858	NM_001205329	83700	JAM3
chr6	14921540	14921955	NM_004973	3720	JARID2
chr6	15445192	15445433	NM_001267040	3720	JARID2
chr10	65472349	65472580	NM_001318154	221037	JMJD1C
chr20	42804333	42804611	NM_175913	57158	JPH2
chr20	42810152	42810417	NM_175913	57158	JPH2
chr20	42799653	42799870	NM_175913	57158	JPH2
chr14	24048142	24048566	NM_032452	84502	JPH4
chr17	39942783	39942982	NM_002230	3728	JUP
chr9	614026	614281	NM_001354336	23189	KANK1
chr1	62792957	62793389	NM_001320269	163782	KANK4
chr1	15255964	15256155	NM_001370231	23254	KAZN
chr8	1922394	1922717	NM_014867	9920	KBTBD11
chr13	41794979	41795170	NM_032138	84078	KBTBD7
chr3	66940493	66940717	NM_032505	84541	KBTBD8
chr12	5204166	5204391	NM_002234	3741	KCNA5
chr1	112424298	112424489	NR_046783	100874295	KCND3-IT1
chr2	223858911	223859111	NM_080671	23704	KCNE4
chr16	84262357	84262548	NM_172347	93107	KCNG4
chr16	84273801	84273992	NM_172347	93107	KCNG4
chr10	103663947	103664169	NM_173197	30819	KCNIP2
chr2	96012582	96012794	NM_001034914	30818	KCNIP3
chr22	38857341	38857564	NM_152868	3761	KCNJ4
chr21	39083594	39083785	NM_002240	3763	KCNJ6
chr21	39234993	39235219	NM_002240	3763	KCNJ6
chr21	39134938	39135144	NM_002240	3763	KCNJ6
chr14	88789335	88789775	NM_138317	54207	KCNK10
chr20	43367446	43367703	NM_022358	60598	KCNK15
chr20	43364807	43365035	NM_022358	60598	KCNK15
chr6	39329728	39329928	NM_001363784	83795	KCNK16
chr10	79516108	79516381	NM_001161352	3778	KCNMA1
chr1	154781602	154781875	NM_170782	3782	KCNN3
chr1	154776368	154776595	NM_170782	3782	KCNN3
chr1	154828796	154829002	NM_170782	3782	KCNN3
chr1	154775988	154776179	NM_170782	3782	KCNN3
chr11	2726832	2727160	NR_002728	10984	KCNQ1OT1
chr11	2717635	2717826	NR_002728	10984	KCNQ1OT1
chr11	2724481	2724681	NR_002728	10984	KCNQ1OT1
chr20	62085578	62085769	NM_004518	3785	KCNQ2
chr2	18336331	18336638	NM_002252	3790	KCNS3
chr11	77750990	77751311	NM_001282406	65987	KCTD14
chr11	77751474	77751684	NM_001282406	65987	KCTD14
chr2	201373467	201373686	NM_001321550	130535	KCTD18
chr17	73056588	73056801	NM_015353	23510	KCTD2
chr16	2743083	2743295	NM_018992	54442	KCTD5
chr16	2742679	2742973	NM_018992	54442	KCTD5
chr22	38857715	38857978	NM_016657	11015	KDELR3
chr12	122015352	122015612	NM_001005366	84678	KDM2B
chr5	137727554	137727745	NM_016604	51780	KDM3B
chr10	24207707	24207922	NM_001098500	56243	KIAA1217
chr2	241771447	241771689	NM_001244008	547	KIF1A
chr14	104616053	104616311	NM_015656	26153	KIF26A
chr1	245320122	245320354	NM_018012	55083	KIF26B
chr1	245675900	245676091	NR_151721	111216275	KIF26B-AS1
chr10	32438261	32438464	NM_004521	3799	KIF5B
chr4	55630541	55630814	NM_000222	3815	KIT
chr4	55648161	55648352	NM_000222	3815	KIT
chr13	33606429	33606628	NM_004795	9365	KL
chr2	10197396	10197711	NM_001177718	8462	KLF11
chr9	110410349	110410784	NM_004235	9314	KLF4
chr9	110546742	110547001	NM_004235	9314	KLF4
chr9	110473756	110473947	NM_004235	9314	KLF4
chr13	73833338	73833686	NM_001730	688	KLF5
chrX	55935346	55935597	NM_001324104	11279	KLF8
chr4	166097044	166097272	NM_007246	11275	KLHL2
chr2	23607457	23607672	NM_052920	114818	KLHL29
chr2	23464316	23464578	NM_052920	114818	KLHL29
chr2	23819019	23819421	NM_052920	114818	KLHL29
chr2	23839614	23839805	NM_052920	114818	KLHL29
chr2	23763636	23763918	NM_052920	114818	KLHL29
chr6	53529182	53529412	NM_001003760	401265	KLHL31
chrX	87155715	87155943	NM_057162	56062	KLHL4
chr4	88110166	88110430	NM_001292003	57563	KLHL8
chr15	40882173	40882471	NM_144508	57082	KNL1
chr12	95267623	95267848	NR_036685	160313	KRT19P2
chr17	39105614	39105970	NM_015515	25984	KRT23
chr17	39791319	39791510	NR_033415	284116	KRT42P
chr17	39791733	39791963	NR_033415	284116	KRT42P
chr12	52741992	52742424	NM_001300810	3891	KRT85
chr17	25873819	25874033	NM_014238	8844	KSR1
chrX	153151747	153151980	NM_001278116	3897	L1CAM
chr15	63381657	63381848	NM_001288585	114294	LACTB
chr20	60932564	60932816	NR_109924	101928158	LAMA5-AS1
chr20	60930746	60931233	NR_109924	101928158	LAMA5-AS1
chr1	183187279	183187540	NM_018891	3918	LAMC2
chr9	133884677	133884938	NM_006059	10319	LAMC3
chr7	55495755	55496010	NM_018697	55915	LANCL2
chrX	37431697	37431946	NM_198511	347404	LANCL3
chr2	20265688	20265897	NM_014713	9741	LAPTM4A
chr17	37024390	37024880	NM_001271608	3927	LASP1
chr16	29040585	29040789	NM_014387	27040	LAT
chr2	30495804	30496111	NM_030915	81606	LBH
chr2	30496275	30496520	NM_030915	81606	LBH
chr2	30475707	30475931	NM_030915	81606	LBH
chr14	103557618	103557939	NM_001330236	107984640	LBHD2
chr2	74730229	74730890	NM_001009812	85474	LBX2
chr19	54974727	54974918	NM_198988	94059	LENG9
chr4	25032674	25032964	NM_018176	55203	LGI2
chr7	104585541	104585984	NR_027374	723809	LHFPL3-AS2
chr17	35289174	35289419	NR_135671	102723471	LHX1-DT
chr1	197886321	197886609	NM_001370213	56956	LHX9
chr12	50581462	50581653	NM_001243775	51474	LIMA1
chr4	41511625	41511830	NM_001330672	22998	LIMCH1
chr4	41634755	41634962	NM_001330983	22998	LIMCH1
chr4	41527163	41527354	NM_001330672	22998	LIMCH1
chr3	45594851	45595304	NM_014240	8994	LIMD1
chr3	45595386	45595613	NM_014240	8994	LIMD1
chr1	26736030	26736307	NM_024674	79727	LIN28A
chr1	226521077	226521268	NM_001270410	286826	LIN9
chr21	29073504	29073766	NR_024357	54088	LINC00113
chr1	762715	762934	NR_024321	79854	LINC00115
chr21	46727096	46727437	NR_026943	642852	LINC00205
chr2	38029636	38029902	NR_110011	101929559	LINC00211
chr20	20974094	20974301	NR_147212	105372556	LINC00237
chr14	102173838	102174064	NR_026774	145200	LINC00239
chr4	6690554	6690769	NR_147207	339988	LINC002481
chr13	30475705	30475896	NR_046510	100874059	LINC00297
chr16	85322918	85323330	NR_038859	197196	LINC00311
chr16	85292055	85292393	NR_038859	197196	LINC00311
chr3	8638837	8639028	NR_024065	29931	LINC00312
chr21	44761122	44761313	NR_103713	100126693	LINC00322
chr21	44753076	44753620	NR_103713	100126693	LINC00322
chr21	44738977	44739619	NR_103713	100126693	LINC00322
chr13	24080674	24080888	NR_038995	100506697	LINC00327
chr13	111527279	111527567	NR_027701	283487	LINC00346
chr13	30686839	30687239	NR_046998	100874146	LINC00365
chr13	30716947	30717362	NR_138041	102157400	LINC00384
chr13	73899623	73899859	NR_047009	100874155	LINC00392
chr13	31406628	31406819	NR_047012	100874158	LINC00398
chr13	31409452	31409707	NR_047012	100874158	LINC00398
chr13	74861925	74862312	NR_144451	100507612	LINC00402
chr13	22386248	22386553	NR_047040	100874182	LINC00424
chr13	111658286	111658637	NR_126378	104355135	LINC00431
chr13	36334940	36335131	NR_132115	100507114	LINC00445
chr9	93954870	93955072	NR_135306	100129347	LINC00484
chr2	33136050	33136245	NR_027097	285045	LINC00486
chr20	47114523	47114798	NR_026958	284749	LINC00494
chr3	87132265	87132456	NR_047469	100846978	LINC00506
chr16	3038162	3038377	NR_033861	283875	LINC00514
chr16	3037517	3037922	NR_033861	283875	LINC00514
chr14	38372704	38372941	NR_135286	400208	LINC00517
chr14	101139575	101139811	NR_024096	283601	LINC00523
chr14	101111967	101112158	NR_024096	283601	LINC00523
chr1	213898473	213898993	NR_046189	100861504	LINC00538
chr13	23025532	23025925	NR_103810	100506622	LINC00540
chr13	31444967	31445215	NR_103813	440132	LINC00545
chr3	177315165	177315502	NR_047568	100505566	LINC00578
chr3	177208861	177209206	NR_047568	100505566	LINC00578
chr6	21371949	21372170	NR_103790	100874531	LINC00581
chr15	70153168	70153434	NR_026764	414926	LINC00593
chr13	40977225	40977416	NR_024505	646982	LINC00598
chr12	9216853	9217205	NR_034140	253128	LINC00612
chr4	136436623	136436976	NR_103762	100507528	LINC00613
chr20	61408513	61408704	NR_046225	100652730	LINC00659
chr10	25755116	25755308	NR_108068	101929052	LINC00836
chr10	44387707	44388165	NR_136147	283033	LINC00841
chr10	86024638	86024829	NR_038220	170425	LINC00858
chr10	89102035	89102234	NR_029408	439994	LINC00863
chr10	99609364	99609555	NR_108035	100505561	LINC00866
chr3	72323886	72324077	NR_038221	201617	LINC00870
chr3	156848074	156848602	NR_034007	339894	LINC00880
chr3	194041828	194042019	NR_024480	100131551	LINC00887
chrX	149201240	149201431	NR_027456	100272228	LINC00894
chr22	20193905	20194096	NR_026919	150197	LINC00896
chr11	115833740	115833931	NR_034148	283143	LINC00900
chr16	86377730	86377995	NR_024406	732275	LINC00917
chr15	96170087	96170537	NR_027132	145820	LINC00924
chr12	8473551	8473790	NR_024420	389634	LINC00937
chr12	30960252	30960482	NR_040245	100287314	LINC00941
chr11	12863742	12864233	NR_038904	100506305	LINC00958
chr6	27661789	27662136	NR_038292	100507173	LINC01012
chr5	107977883	107978170	NR_046368	100652853	LINC01023
chr8	91480162	91480365	NR_104062	101937451	LINC01030
chr13	80297640	80297903	NR_125785	102724076	LINC01038
chr13	30982644	30983107	NR_125771	103724387	LINC01058
chr13	53765842	53766054	NR_125788	102723875	LINC01065
chr13	80705440	80705657	NR_104138	101515984	LINC01080
chr4	124940324	124940515	NR_027106	285419	LINC01091
chr6	14477207	14477633	NR_108096	102216342	LINC01108
chr2	45447664	45447855	NR_033831	400952	LINC01121
chr2	45437944	45438313	NR_033831	400952	LINC01121
chr2	45486527	45486894	NR_033831	400952	LINC01121
chr2	45380206	45380526	NR_033831	400952	LINC01121
chr2	171548050	171548355	NR_027433	440925	LINC01124
chr2	43478634	43478825	NR_027251	100129726	LINC01126
chr2	71089263	71089557	NR_126384	104355141	LINC01143
chr8	123692924	123693194	NR_126348	104266958	LINC01151
chr8	123651337	123651606	NR_126348	104266958	LINC01151
chr10	130010396	130010645	NR_120619	101927381	LINC01163
chr10	130117683	130117944	NR_120619	101927381	LINC01163
chr3	163058427	163058644	NR_033945	647107	LINC01192
chr16	9891019	9891326	NR_126349	104266959	LINC01195
chr3	149889405	149889596	NR_110168	101927992	LINC01213
chr14	75777565	75777866	NR_038421	731223	LINC01220
chr16	79919380	79919571	NR_104661	101928248	LINC01229
chr12	114301300	114301537	NR_110026	100506465	LINC01234
chr12	114211577	114211852	NR_110026	100506465	LINC01234
chr2	3109184	3109541	NR_110228	101927554	LINC01250
chr20	43321547	43321754	NR_034104	79015	LINC01260
chr20	43313792	43314140	NR_034104	79015	LINC01260
chr3	14364608	14364909	NR_110135	101927565	LINC01267
chr3	14414049	14414240	NR_110135	101927565	LINC01267
chr3	14364264	14364492	NR_110135	101927565	LINC01267
chr3	14365727	14365942	NR_110135	101927565	LINC01267
chr20	48908920	48909173	NR_034124	284751	LINC01270
chr20	48985659	48985955	NR_109950	101927586	LINC01271
chr20	48929317	48929554	NR_109950	101927586	LINC01271
chr20	49031891	49032183	NR_109950	101927586	LINC01271
chr8	142317963	142318177	NR_024441	731779	LINC01300
chr6	134028499	134028864	NR_027030	154089	LINC01312
chr5	73651304	73651514	NR_105010	101929082	LINC01333
chr5	73403580	73403811	NR_105009	102503429	LINC01335
chr5	73419760	73419951	NR_105009	102503429	LINC01335
chr1	203256258	203256515	NR_117097	100506775	LINC01353
chr1	203256819	203257017	NR_117098	100506775	LINC01353
chr1	203259781	203260184	NR_117098	100506775	LINC01353
chr1	234658974	234659165	NR_038426	100506795	LINC01354
chr1	59528509	59528700	NR_110626	101926925	LINC01358
chr7	67090462	67090653	NR_108104	101929736	LINC01372
chr1	48175230	48175468	NR_126355	102724077	LINC01389
chr1	47999439	47999630	NR_126355	102724077	LINC01389
chr11	129506769	129506961	NR_120582	101929557	LINC01395
chr11	129528030	129528250	NR_120582	101929557	LINC01395
chr1	46908582	46908775	NR_121680	101929651	LINC01398
chr5	173750874	173751172	NR_125806	101928176	LINC01411
chr15	57616072	57616263	NR_120337	101928611	LINC01413
chr15	57620595	57620842	NR_120337	101928611	LINC01413
chr21	36118059	36118323	NR_038886	100506385	LINC01426
chr20	22321989	22322180	NR_110615	101929663	LINC01427
chr7	41087583	41087862	NR_110832	101928773	LINC01449
chr7	40756791	40756982	NR_110831	101928744	LINC01450
chr2	27926469	27926682	NR_135200	100129995	LINC01460
chr3	127266366	127266586	NR_125397	101927149	LINC01471
chr19	42036773	42037021	NR_110724	101927931	LINC01480
chr5	173209159	173209443	NR_108028	101928154	LINC01485
chr14	59349499	59349690	NR_110547	102723742	LINC01500
chr9	71199306	71199556	NR_109769	101927015	LINC01506
chr7	116231735	116231926	NR_120506	100996266	LINC01510
chr20	46798347	46798668	NR_110027	101927457	LINC01522
chr20	46584975	46585217	NR_109942	101060004	LINC01523
chr1	117827034	117827285	NR_126408	104355292	LINC01525
chr21	18827253	18827451	NR_037585	100505929	LINC01549
chr12	13511604	13511795	NR_036555	283422	LINC01559
chr16	73644092	73644283	NR_038234	100506172	LINC01568
chr16	73649001	73649240	NR_038234	100506172	LINC01568
chr15	93387162	93387451	NR_037600	100507217	LINC01578
chr15	82422381	82422572	NR_120367	101929690	LINC01583
chr15	86727119	86727310	NR_120368	101929701	LINC01584
chr15	86705806	86705997	NR_120368	101929701	LINC01584
chr14	50528367	50528667	NR_131171	196913	LINC01599
chr6	169572418	169572736	NR_132623	101929484	LINC01615
chr6	170579374	170579635	NR_104177	401289	LINC01624
chr6	139909165	139909586	NR_033919	645434	LINC01625
chr18	48918411	48918609	NR_040075	100287225	LINC01630
chr18	49193315	49193568	NR_040075	100287225	LINC01630
chr22	27620446	27620795	NM_001350812	105372978	LINC01638
chr22	27608761	27609011	NM_001350812	105372978	LINC01638
chr22	27635391	27635610	NM_001350812	105372978	LINC01638
chr21	44917734	44917987	NR_136540	102724354	LINC01669
chr1	6784808	6785048	NR_104620	100505887	LINC01672
chr1	38941279	38941509	NR_146761	105378656	LINC01685
chr21	47010676	47011113	NR_146912	105372840	LINC01694
chr21	40395101	40395406	NR_109962	101928435	LINC01700
chr20	6644176	6644416	NR_146909	105372516	LINC01713
chr1	8177479	8177752	NR_125998	102724539	LINC01714
chr20	59709306	59709497	NR_109919	100506470	LINC01718
chr20	59711095	59711558	NR_109919	100506470	LINC01718
chr1	181104952	181105326	NR_125966	101928973	LINC01732
chr1	181159250	181159453	NR_125966	101928973	LINC01732
chr1	63429174	63429365	NR_146607	105378769	LINC01739
chr20	56576635	56577044	NR_147083	105376992	LINC01742
chr20	56576307	56576529	NR_147083	105376992	LINC01742
chr20	56618681	56618924	NR_147083	105376992	LINC01742
chr20	56645325	56645631	NR_147083	105376992	LINC01742
chr20	56479729	56479920	NR_147083	105376992	LINC01742
chr1	232756130	232756343	NR_146922	105373199	LINC01745
chr20	22664905	22665320	NR_146527	105372566	LINC01747
chr20	61646329	61646591	NR_033370	63930	LINC01749
chr20	46012962	46013239	NR_146495	102723442	LINC01754
chr1	29840075	29840350	NR_110758	101928460	LINC01756
chr1	117041617	117041816	NR_125973	101929023	LINC01762
chr1	1368251	1368634	NR_125994	102724312	LINC01770
chr1	1366103	1366351	NR_125994	102724312	LINC01770
chr1	53801869	53802060	NR_131923	105378732	LINC01771
chr1	209279928	209280186	NR_146915	105372894	LINC01774
chr1	31280282	31280819	NR_146732	105378622	LINC01778
chr19	32595682	32595889	NR_110694	101927411	LINC01782
chr19	31600309	31600691	NR_147209	107985312	LINC01791
chr2	59476801	59477038	NR_110219	101927285	LINC01793
chr2	65085196	65085387	NR_110224	101927438	LINC01800
chr2	65103124	65103367	NR_110224	101927438	LINC01800
chr2	229565345	229565628	NR_151716	101928765	LINC01807
chr2	67878184	67878387	NR_110271	101927701	LINC01812
chr2	70340484	70340675	NR_024444	100133985	LINC01816
chr2	70350279	70350473	NR_024444	100133985	LINC01816
chr19	14459154	14459416	NR_134916	101928845	LINC01842
chr18	53664314	53664614	NR_146510	102724698	LINC01905
chr18	68132089	68132463	NR_110764	101060542	LINC01910
chr2	41946979	41947170	NR_033996	388942	LINC01913
chr2	42157926	42158117	NR_110263	101929723	LINC01914
chr2	42161425	42161636	NR_110262	101929723	LINC01914
chr18	22236951	22237142	NR_040033	729950	LINC01915
chr18	22166094	22166523	NR_040033	729950	LINC01915
chr5	55705420	55705739	NR_104664	102467147	LINC01948
chr2	214054227	214054480	NR_146974	105373863	LINC01953
chr17	80251499	80251690	NR_135639	101929511	LINC01970
chr17	75775443	75775934	NR_104134	100132174	LINC01987
chr3	107140027	107140220	NR_110039	101929607	LINC01990
chr3	133789959	133790324	NR_135574	100507210	LINC02000
chr17	70403475	70403704	NR_135222	146795	LINC02003
chr3	73835909	73836160	NR_146637	105377165	LINC02005
chr3	81937883	81938113	NR_147146	105377180	LINC02008
chr3	146807118	146807415	NR_135561	101927866	LINC02010
chr3	197194244	197194451	NR_145451	100129516	LINC02012
chr3	197133084	197133537	NR_145451	100129516	LINC02012
chr3	129814667	129815044	NR_146710	105374105	LINC02014
chr3	177666420	177666615	NR_110826	102724550	LINC02015
chr3	84954278	84954591	NR_147147	105377192	LINC02025
chr3	84953893	84954103	NR_147147	105377192	LINC02025
chr3	193983746	193983948	NR_125403	100505920	LINC02036
chr3	193544388	193544614	NR_146718	105374285	LINC02038
chr5	60548196	60548540	NR_146624	105378992	LINC02057
chr3	78098758	78098990	NR_146636	105377172	LINC02077
chr17	74769171	74769387	NR_110837	101928514	LINC02080
chr17	13319224	13319426	NR_146885	105371541	LINC02093
chr17	13126289	13126561	NR_146885	105371541	LINC02093
chr5	53180273	53180626	NR_147167	105378966	LINC02105
chr5	102764203	102764423	NR_104670	102467212	LINC02115
chr16	14580652	14580859	NR_131191	105447648	LINC02130
chr16	14495297	14495631	NR_131191	105447648	LINC02130
chr16	14578122	14578441	NR_131191	105447648	LINC02130
chr16	86334657	86334848	NR_038438	146513	LINC02135
chr16	85191397	85191800	NR_033984	400548	LINC02139
chr16	54404778	54405060	NR_134923	100996345	LINC02140
chr4	3709479	3709751	NR_034136	100133461	LINC02171
chr16	87040772	87040984	NR_126008	440390	LINC02181
chr16	86926029	86926229	NR_126008	440390	LINC02181
chr16	86840441	86840904	NR_135182	102724344	LINC02188
chr16	86784956	86785147	NR_135182	102724344	LINC02188
chr16	86853574	86853765	NR_135182	102724344	LINC02188
chr16	86703357	86703549	NR_135181	101928614	LINC02189
chr5	68026361	68026554	NR_130778	101928885	LINC02198
chr15	70669291	70669682	NR_146562	105370880	LINC02205
chr15	67224298	67224688	NR_135687	102723481	LINC02206
chr8	29762675	29762998	NR_024473	286135	LINC02209
chr5	116106884	116107087	NR_104678	102467223	LINC02214
chr5	18698567	18698790	NR_134287	646241	LINC02223
chr5	72570583	72571231	NR_146627	105379033	LINC02230
chr5	124653231	124653475	NR_109887	101927460	LINC02240
chr5	124911669	124912043	NR_109887	101927460	LINC02240
chrX	134099637	134099834	NR_134925	340581	LINC02243
chr15	97778504	97778695	NR_120324	101927286	LINC02254
chr4	40267213	40267417	NR_121641	101060498	LINC02265
chr4	40311458	40311681	NR_121641	101060498	LINC02265
chr14	84293613	84293817	NR_146650	101928599	LINC02301
chr14	97543519	97543908	NR_146554	105370648	LINC02304
chr14	81916178	81916389	NR_109999	100506700	LINC02308
chr15	102154065	102154272	NR_147041	101927505	LINC02348
chr12	132663342	132663619	NR_146452	100996246	LINC02361
chr4	185305247	185305789	NR_125934	102723766	LINC02362
chr4	185304801	185305029	NR_125934	102723766	LINC02362
chr12	127421068	127421291	NR_033970	440117	LINC02372
chr12	127865842	127866064	NR_110057	101927616	LINC02375
chr12	92898027	92898281	NR_144532	100507616	LINC02397
chr12	67935541	67935732	NR_103861	100507175	LINC02408
chr12	66430162	66430431	NR_146530	105369810	LINC02425
chr12	89379176	89379466	NR_038385	728084	LINC02458
chr12	89495308	89495660	NR_038385	728084	LINC02458
chr12	20365639	20365830	NR_146523	105369684	LINC02468
chr4	189931608	189931799	NR_149102	105377610	LINC02508
chr4	177822533	177822766	NR_149104	105377556	LINC02509
chr6	3209486	3209700	NR_038295	100507194	LINC02525
chr6	4405701	4405892	NR_149117	105374895	LINC02533
chr6	4358681	4358929	NR_149117	105374895	LINC02533
chr6	138098013	138098273	NR_121619	100507406	LINC02539
chr11	29290952	29291294	NR_149107	105376606	LINC02546
chr11	130701139	130701403	NR_125383	100507431	LINC02551
chr11	130653540	130653767	NR_125383	100507431	LINC02551
chr11	130653925	130654147	NR_125383	100507431	LINC02551
chr11	130731722	130731913	NR_125383	100507431	LINC02551
chr22	27773535	27773741	NR_134581	100507657	LINC02554
chr17	63430362	63430562	NR_131984	105827617	LINC02563
chr2	43314005	43314311	NR_151714	100506047	LINC02580
chr2	43298564	43298859	NR_151714	100506047	LINC02580
chr1	110750471	110750705	NR_046546	100873974	LINC02586
chr2	38763411	38763652	NR_110259	101929596	LINC02613
chr4	129375602	129375862	NR_125882	100507487	LINC02615
chr10	21581867	21582058	NR_155751	105376444	LINC02643
chr10	28721268	28721510	NR_134496	105376468	LINC02652
chr10	6424290	6424592	NR_148966	399716	LINC02656
chr10	31446532	31446913	NR_134478	101929352	LINC02664
chr10	103055402	103055669	NR_120621	101927419	LINC02681
chr14	104686661	104686881	NR_146611	145195	LINC02691
chr17	21427226	21427775	NR_160801	339263	LINC02693
chr11	127065356	127065760	NR_120580	101929497	LINC02712
chr11	133917592	133917851	NR_027276	100128239	LINC02731
chr11	112627855	112628200	NR_104155	387810	LINC02764
chr11	112619844	112620076	NR_104155	387810	LINC02764
chr11	112409621	112409812	NR_104155	387810	LINC02764
chr7	130581869	130582145	NR_110473	378805	LINC-PINT
chr15	58803532	58803745	NR_120338	101928694	LIPC-AS1
chr15	58844098	58844437	NR_120338	101928694	LIPC-AS1
chr3	8525262	8525535	NR_033378	100288428	LMCD1-AS1
chr3	8541053	8541307	NR_033378	100288428	LMCD1-AS1
chr5	126115194	126115402	NM_005573	4001	LMNB1
chr12	25589207	25589425	NM_001256266	160492	LMNTD1
chr13	76444696	76444909	NM_001257995	729420	LMO7DN
chr3	69231683	69231904	NM_198271	56203	LMOD3
chr9	129427319	129427823	NM_001174146	4010	LMX1B
chr9	129433422	129433996	NM_001174146	4010	LMX1B
chr9	129404934	129405243	NM_001174146	4010	LMX1B
chr8	143808098	143808405	NR_038925	100288181	LNCOC1
chr3	100122335	100122542	NM_001085451	348801	LNP1
chr5	96315077	96315274	NM_175920	4012	LNPEP
chr12	3340361	3340713	NR_148995	100128253	LOC100128253
chr12	3339784	3340142	NR_148995	100128253	LOC100128253
chr16	88600347	88600538	NR_148997	100128882	LOC100128882
chr9	127105721	127106138	NR_027406	100129034	LOC100129034
chr1	2231981	2232429	NR_024489	100129534	LOC100129534
chr16	81679059	81679333	NR_045112	100129617	LOC100129617
chr8	61777487	61777678	NR_034003	100130298	LOC100130298
chr8	61825383	61825589	NR_034003	100130298	LOC100130298
chr8	61926301	61926495	NR_034003	100130298	LOC100130298
chr8	61925445	61925698	NR_034003	100130298	LOC100130298
chr20	34761464	34761810	NR_147703	100130373	LOC100130373
chr6	38877183	38877389	NR_038401	100131047	LOC100131047
chr6	27740447	27740638	NR_038929	100131289	LOC100131289
chr11	112126077	112126398	NR_133566	100132686	LOC100132686
chr2	105024720	105024986	NR_037885	100287010	LOC100287010
chr1	224180830	224181203	NR_136593	100287497	LOC100287497
chr12	46887609	46887834	NR_125381	100288798	LOC100288798
chr17	47630042	47630302	NR_103773	100288866	LOC100288866
chr19	44616222	44616538	NR_033341	100379224	LOC100379224
chr10	31907571	31907762	NM_001368169	100505502	LOC100505502
chr10	31907924	31908139	NM_001368169	100505502	LOC100505502
chr9	126762077	126762293	NR_135129	100505588	LOC100505588
chr6	39855151	39855388	NR_125831	100505635	LOC100505635
chr20	49261909	49262297	NR_111906	100506175	LOC100506175
chr7	22601213	22601426	NR_038393	100506178	LOC100506178
chr21	36749808	36750015	NR_073512	100506403	LOC100506403
chr21	36876044	36876235	NR_073512	100506403	LOC100506403
chr21	36811128	36811330	NR_073512	100506403	LOC100506403
chr2	13105325	13105589	NR_038434	100506474	LOC100506474
chr11	32008743	32008947	NR_120526	100506675	LOC100506675
chr11	32009148	32009364	NR_120526	100506675	LOC100506675
chr11	35104083	35104319	NR_120528	100507144	LOC100507144
chr11	35104428	35104630	NR_120528	100507144	LOC100507144
chr8	23185162	23185604	NR_038323	100507156	LOC100507156
chr8	23186932	23187135	NR_038323	100507156	LOC100507156
chr14	105877546	105877744	NR_125385	100507437	LOC100507437
chr11	134877071	134877305	NR_135050	100507548	LOC100507548
chr11	134776050	134776241	NR_135050	100507548	LOC100507548
chr7	54856493	54856737	NR_110040	100996654	LOC100996654
chr14	68712454	68712656	NR_135816	100996664	LOC100996664
chr14	68844323	68844523	NR_135816	100996664	LOC100996664
chr14	69061028	69061336	NR_135816	100996664	LOC100996664
chr9	137763138	137763394	NR_103451	101448202	LOC101448202
chr6	46816977	46817269	NR_110658	101926962	LOC101926962
chr18	6751577	6751773	NR_134645	101927168	LOC101927168
chr5	115714454	115714696	NR_104675	101927190	LOC101927190
chr12	50361050	50361333	NR_110589	101927318	LOC101927318
chr20	45982876	45983100	NR_134501	101927377	LOC101927377
chr3	8019708	8019974	NR_110131	101927394	LOC101927394
chr1	15655261	15655471	NR_148919	101927417	LOC101927417
chr5	124242259	124242556	NR_109882	101927421	LOC101927421
chr1	81943961	81944195	NR_125943	101927434	LOC101927434
chr9	81630340	81630544	NR_109771	101927450	LOC101927450
chrX	40104762	40104953	NR_110386	101927476	LOC101927476
chr17	55657917	55658120	NR_110807	101927539	LOC101927539
chr17	55518647	55518892	NR_110808	101927557	LOC101927557
chr17	55634902	55635534	NR_110808	101927557	LOC101927557
chr17	55625494	55625685	NR_110808	101927557	LOC101927557
chr9	86778067	86778258	NR_110995	101927575	LOC101927575
chr20	52133793	52134029	NR_110051	101927770	LOC101927770
chr9	92692584	92692835	NR_109791	101927847	LOC101927847
chr1	235159052	235159335	NR_125945	101927851	LOC101927851
chr1	235116666	235116882	NR_125945	101927851	LOC101927851
chr1	235114729	235115063	NR_125945	101927851	LOC101927851
chr17	59313378	59313670	NR_136397	101927855	LOC101927855
chr17	59372107	59372321	NR_136397	101927855	LOC101927855
chr17	59273634	59274040	NR_136397	101927855	LOC101927855
chr2	209366132	209366346	NR_136588	101927960	LOC101927960
chr17	5000573	5000950	NR_135658	101928000	LOC101928000
chr5	172140192	172140449	NR_161233	101928093	LOC101928093
chr5	172163409	172163739	NR_161233	101928093	LOC101928093
chr9	97640989	97641231	NR_147614	101928119	LOC101928119
chr9	97738342	97738648	NR_147613	101928119	LOC101928119
chr15	35047194	35047386	NR_120329	101928174	LOC101928174
chr17	9099858	9100049	NR_110828	101928266	LOC101928266
chr6	135035858	135036269	NR_125856	101928304	LOC101928304
chr6	134860921	134861178	NR_125855	101928304	LOC101928304
chr2	144339618	144339815	NR_110237	101928386	LOC101928386
chr2	144365155	144365346	NR_110237	101928386	LOC101928386
chr16	83028878	83029092	NR_110937	101928417	LOC101928417
chr10	14205557	14205748	NR_120638	101928453	LOC101928453
chr6	17484085	17484357	NR_110855	101928491	LOC101928491
chr7	131630364	131630566	NR_110836	101928782	LOC101928782
chr21	47370538	47370813	NR_109931	101928796	LOC101928796
chr7	132003473	132003874	NR_134565	101928807	LOC101928807
chr7	131941804	131941995	NR_134565	101928807	LOC101928807
chr19	5847544	5847811	NR_110740	101928844	LOC101928844
chr11	114211125	114211397	NR_120567	101928940	LOC101928940
chr4	85219959	85220330	NR_125909	101928978	LOC101928978
chr9	128908597	128909133	NR_121584	101929116	LOC101929116
chr6	159591070	159591382	NR_121668	101929122	LOC101929122
chr5	77231651	77231876	NR_105013	101929154	LOC101929154
chr5	77289405	77289723	NR_105013	101929154	LOC101929154
chr5	77286062	77286253	NR_105013	101929154	LOC101929154
chr11	120823198	120823633	NR_133004	101929208	LOC101929208
chr8	49342877	49343337	NR_105002	101929268	LOC101929268
chr8	49231089	49231280	NR_105002	101929268	LOC101929268
chr9	132020463	132020786	NR_121587	101929331	LOC101929331
chr5	86438036	86438352	NR_105018	101929380	LOC101929380
chr15	76483018	76483237	NR_120360	101929439	LOC101929439
chr1	40265509	40265741	NR_135805	101929536	LOC101929536
chr4	106919368	106919731	NR_125928	101929577	LOC101929577
chr16	3053627	3053882	NR_110948	101929613	LOC101929613
chr2	10169355	10169835	NR_135558	101929882	LOC101929882
chr2	10182990	10183285	NR_135558	101929882	LOC101929882
chr8	42122945	42123273	NR_125823	101929897	LOC101929897
chr1	41864999	41865293	NR_135817	101929901	LOC101929901
chr1	41846487	41846762	NR_135817	101929901	LOC101929901
chr5	71893447	71893684	NR_105008	102503427	LOC102503427
chr20	12906026	12906294	NR_109872	102606466	LOC102606466
chr15	67356700	67356982	NR_135686	102723493	LOC102723493
chr15	67336547	67336897	NR_135686	102723493	LOC102723493
chr15	67316203	67316394	NR_135686	102723493	LOC102723493
chr15	67310355	67310679	NR_135686	102723493	LOC102723493
chr3	122135821	122136171	NR_125405	102723582	LOC102723582
chr6	138014154	138014368	NR_125867	102723649	LOC102723649
chr11	69259249	69259440	NM_001319657	102724265	LOC102724265
chr11	119630353	119630545	NR_120587	102724301	LOC102724301
chr6	169497517	169497941	NR_134619	102724357	LOC102724357
chr6	170449000	170449574	NR_125878	102724511	LOC102724511
chr16	4061311	4061921	NR_120311	102724927	LOC102724927
chr1	7529559	7529750	NR_146201	102725193	LOC102725193
chr1	7351151	7351391	NR_146199	102725193	LOC102725193
chr1	7529178	7529438	NR_146201	102725193	LOC102725193
chr12	65930912	65931205	NR_135033	105369187	LOC105369187
chr12	65931519	65931710	NR_135033	105369187	LOC105369187
chr15	101404590	101404781	NR_160707	105369201	LOC105369201
chr15	101305189	101305405	NR_160702	105369201	LOC105369201
chr15	96579712	96580174	NR_158193	105369212	LOC105369212
chr12	119614147	119614343	NR_134996	105370024	LOC105370024
chr14	91164891	91165303	NR_135190	105370622	LOC105370622
chr15	93902953	93903174	NM_001365393	105370980	LOC105370980
chr1	148854568	148854838	NR_160535	105371215	LOC105371215
chr1	150135071	150135417	NR_135098	105371433	LOC105371433
chr17	1843506	1843731	NR_135642	105371485	LOC105371485
chr17	58159862	58160057	NR_135648	105371849	LOC105371849
chr18	25027703	25027894	NR_134589	105372038	LOC105372038
chr20	52238310	52238614	NR_134576	105372672	LOC105372672
chr22	27535717	27535908	NM_001318392	105372977	LOC105372977
chr22	27536019	27536301	NM_001318392	105372977	LOC105372977
chr22	27598564	27599242	NM_001318392	105372977	LOC105372977
chr22	27520443	27520634	NM_001318392	105372977	LOC105372977
chr22	30840975	30841322	NR_148046	105372990	LOC105372990
chr2	4320297	4320636	NR_136322	105373394	LOC105373394
chr2	29698737	29698928	NR_136317	105374389	LOC105374389
chr2	29644052	29644641	NR_136317	105374389	LOC105374389
chr6	23003968	23004175	NR_134614	105374972	LOC105374972
chr7	4267207	4267438	NR_158215	105375131	LOC105375131
chr7	4255830	4256089	NR_158215	105375131	LOC105375131
chr7	26415587	26415778	NR_136271	105375304	LOC105375304
chr3	17882603	17882817	NR_135536	105376975	LOC105376975
chr3	17794979	17795182	NR_135536	105376975	LOC105376975
chr4	144005275	144005491	NR_136203	105377623	LOC105377623
chr5	170024997	170025219	NR_136214	105377716	LOC105377716
chr6	161834597	161834788	NR_134593	105378098	LOC105378098
chr6	169316732	169317038	NR_136248	105378146	LOC105378146
chr1	1534894	1535129	NR_147951	105378586	LOC105378586
chr1	19890111	19890534	NR_135054	105378614	LOC105378614
chr5	72432093	72432358	NR_134252	105379030	LOC105379030
chr5	138077985	138078265	NR_134245	105379194	LOC105379194
chr10	104679636	104679849	NR_160733	107984265	LOC107984265
chr11	66886013	66886216	NR_160735	107984341	LOC107984341
chr22	40437323	40437514	NR_163486	114841040	LOC114841040
chr1	231346960	231347172	NM_001256615	149373	LOC149373
chr1	231347282	231347541	NM_001256615	149373	LOC149373
chr12	53446625	53446832	NR_033854	283335	LOC283335
chr12	58299095	58299443	NR_148947	283387	LOC283387
chr15	31558221	31558545	NM_001243538	283710	LOC283710
chr16	56224704	56225013	NR_027078	283856	LOC283856
chr18	77362611	77362842	NR_148949	284240	LOC284240
chr18	77336035	77336286	NR_148949	284240	LOC284240
chr19	13961127	13961320	NR_036515	284454	LOC284454
chr22	27496983	27497174	NM_001318329	284898	LOC284898
chr22	48314257	48314606	NR_122046	284930	LOC284930
chr2	242841257	242841494	NR_135768	285095	LOC285095
chr5	172924696	172924887	NR_027108	285593	LOC285593
chr5	172999950	173000206	NR_027108	285593	LOC285593
chr5	172922433	172922646	NR_027108	285593	LOC285593
chr20	11432438	11432707	NR_038972	339593	LOC339593
chr3	18153284	18153476	NR_161333	339862	LOC339862
chr1	153762941	153763238	NR_126565	343052	LOC343052
chr9	15116109	15116321	NR_003920	389705	LOC389705
chr9	88419755	88420040	NR_029410	389765	LOC389765
chr8	73228918	73229218	NR_033867	392232	LOC392232
chr11	129149231	129149444	NR_145484	399975	LOC399975
chr17	78866137	78866593	NR_148968	400627	LOC400627
chr15	78251956	78252166	NR_157580	440292	LOC440292
chr15	95220396	95220587	NR_077061	440311	LOC440311
chr16	25060172	25060698	NR_038379	554206	LOC554206
chr9	127025195	127025442	NR_149024	613206	LOC613206
chr12	93771226	93771489	NR_040096	643339	LOC643339
chr7	151503220	151503851	NM_001354885	644090	LOC644090
chr5	149267298	149267652	NR_110534	644762	LOC644762
chr7	25899919	25900509	NR_157808	646588	LOC646588
chr7	25817856	25818304	NR_157813	646588	LOC646588
chr2	226756209	226756548	NR_046102	646736	LOC646736
chr15	79043257	79043454	NR_036495	646938	LOC646938
chr9	140677630	140677866	NR_147508	651337	LOC651337
chr1	35444398	35444618	NR_037869	653160	LOC653160
chr17	5429977	5430181	NM_001162371	728392	LOC728392
chr8	12522902	12523119	NR_047662	729732	LOC729732
chr7	46899780	46900105	NR_134575	730338	LOC730338
chr22	46393672	46393956	NR_027240	730668	LOC730668
chr2	237781719	237781910	NR_135202	93463	LOC93463
chr20	39958194	39958615	NM_022896	64900	LPIN3
chr20	39968857	39969320	NM_022896	64900	LPIN3
chr2	15180317	15180530	NM_145175	151354	LRATD1
chr19	39811781	39812145	NM_020862	57622	LRFN1
chr14	42077978	42078249	NM_001330106	145581	LRFN5
chr11	68085049	68085290	NM_001291902	4041	LRP5
chr11	68097099	68097316	NM_001291902	4041	LRP5
chr4	3534309	3534559	NM_002337	4043	LRPAP1
chr7	127667376	127667593	NM_022143	64101	LRRC4
chr12	122607677	122607868	NM_152759	254050	LRRC43
chr7	150008261	150008464	NM_001363434	65999	LRRC61
chr17	16414850	16415147	NM_001113567	388341	LRRC75A
chr17	16420516	16420707	NM_001113567	388341	LRRC75A
chr14	60431926	60432200	NM_001355272	341883	LRRC9
chr2	238600282	238600511	NM_001137551	9208	LRRFIP1
chr2	238576633	238577040	NM_001137551	9208	LRRFIP1
chr2	238578170	238578377	NM_001137551	9208	LRRFIP1
chr15	101459872	101460167	NM_024652	79705	LRRK1
chr3	3602034	3602245	NM_001324188	57633	LRRN1
chr1	204694996	204695263	NM_006338	10446	LRRN2
chr1	204680995	204681809	NM_006338	10446	LRRN2
chr12	1905489	1905680	NM_001163925	654429	LRTM2
chr3	14277395	14277688	NM_014463	27258	LSM3
chr7	32530614	32530842	NR_024466	23658	LSM5
chr2	91759767	91759983	NR_027238	654342	LSP1P4
chr14	75054595	75054787	NM_000428	4053	LTBP2
chr14	75066810	75067075	NM_000428	4053	LTBP2
chr9	12814036	12814230	NR_125775	101929467	LURAP1L-AS1
chr6	6700131	6700940	NR_026970	285780	LY86-AS1
chr2	149957585	149957850	NM_001317002	130576	LYPD6B
chr2	149875762	149876096	NM_001317003	130576	LYPD6B
chr1	236135271	236135520	NR_102436	1130	LYST
chr1	236134899	236135136	NR_102436	1130	LYST
chr10	29593638	29593935	NM_032517	84569	LYZL1
chr1	39608367	39608722	NM_012090	23499	MACF1
chr16	79205880	79206154	NM_005360	4094	MAF
chr16	78951141	78951334	NM_005360	4094	MAF
chr16	79692381	79692641	NM_001031804	4094	MAF
chr3	184374721	184374944	NM_022149	64110	MAGEF1
chr3	65605104	65605431	NR_046575	100873983	MAGI1-AS1
chr3	65869378	65869586	NR_046575	100873983	MAGI1-AS1
chr8	120220718	120220909	NM_052886	114569	MAL2
chr9	72590934	72591158	NM_001347990	256691	MAMDC2
chr11	96076583	96076795	NM_032427	84441	MAML2
chr1	26034348	26034550	NM_001289010	57134	MAN1C1
chr1	26003221	26003428	NM_001289010	57134	MAN1C1
chr1	25993256	25993447	NM_001289010	57134	MAN1C1
chr15	91438935	91439191	NM_001320977	4122	MAN2A2
chr15	43808466	43808756	NM_002373	4130	MAP1A
chr5	71405356	71405588	NM_005909	4131	MAP1B
chr5	71310840	71311400	NM_005909	4131	MAP1B
chr17	21191486	21191721	NM_002756	5606	MAP2K3
chr17	43371069	43371262	NM_003954	9020	MAP3K14
chr17	43370740	43370975	NM_003954	9020	MAP3K14
chr21	30476792	30477285	NM_001286619	56911	MAP3K7CL
chr11	64570415	64570663	NM_001307990	5871	MAP4K2
chr2	39751172	39751363	NR_037875	728730	MAP4K3-DT
chr2	39743888	39744103	NR_037875	728730	MAP4K3-DT
chr1	36653521	36653945	NM_001286365	55700	MAP7D1
chr15	52313376	52313608	NM_002748	5597	MAPK6
chr11	45907211	45907479	NM_005456	9479	MAPK8IP1
chr1	206880024	206880236	NM_032960	9261	MAPKAPK2
chr1	206837483	206837952	NM_004759	9261	MAPKAPK2
chr2	217204575	217205002	NM_020814	57574	MARCH4
chr1	30998644	30999339	NR_034182	100129196	MATN1-AS1
chr18	13796754	13797028	NM_005913	4161	MC5R
chr13	113540358	113540719	NR_034002	100289410	MCF2L-AS1
chr2	47182069	47182367	NM_001171511	90411	MCFD2
chr22	41110464	41111037	NM_005297	2847	MCHR1
chr12	68752525	68752733	NM_001354971	56890	MDM1
chr6	165341627	165342111	NR_131926	105378111	MEAT6
chr17	60143567	60143765	NM_005121	9969	MED13
chr9	134889519	134889713	NM_001253882	9442	MED27
chr8	118675716	118676108	NM_001363182	90390	MED30
chr13	48730609	48730823	NM_001270629	29079	MED4
chr5	88368985	88369281	NM_001131005	4208	MEF2C
chr1	156465899	156466187	NM_005920	4209	MEF2D
chr9	123493373	123493683	NM_001080497	1955	MEGF9
chr2	32235220	32235411	NM_015955	51072	MEMO1
chr15	90319545	90319823	NM_001039958	145873	MESP2
chr7	116381433	116381624	NM_001324401	4233	MET
chr16	764643	764932	NM_024042	79006	METRN
chr17	81057392	81057876	NM_001363853	284207	METRNL
chr17	81041946	81042150	NM_001363853	284207	METRNL
chr12	51318031	51318242	NM_014033	25840	METTL7A
chr18	48680693	48680950	NM_016626	51320	MEX3C
chr18	48680044	48680375	NM_016626	51320	MEX3C
chr19	1568490	1568718	NM_001174118	399664	MEX3D
chr4	140163146	140163352	NM_032623	84709	MGARP
chr2	135125552	135125743	NM_002410	4249	MGAT5
chr17	74868684	74868991	NM_198955	146664	MGAT5B
chr2	240149725	240149978	NR_026664	85009	MGC16025
chr4	140762641	140762884	NM_001204368	4258	MGST2
chr4	140572626	140572931	NM_001204367	4258	MGST2
chr11	12108078	12108269	NM_001282668	9645	MICAL2
chr11	12340339	12340530	NM_032867	84953	MICALCL
chr11	12309280	12309542	NM_032867	84953	MICALCL
chr1	94239020	94239291	NR_148965	723788	MIG7
chr1	94204529	94204738	NR_148965	723788	MIG7
chr1	94206485	94206676	NR_148965	723788	MIG7
chr1	94205939	94206265	NR_148965	723788	MIG7
chr17	46089514	46089733	NR_162100	113218499	MIR10226
chr5	172324648	172325092	NR_162113	113218510	MIR10523
chr7	74021108	74021361	NR_162116	113218504	MIR10525
chr12	120131197	120131403	NR_031589	100302274	MIR1178
chr8	129338145	129338336	NR_031613	100302281	MIR1208
chr8	129189787	129189978	NR_031613	100302281	MIR1208
chr8	129121399	129121871	NR_031613	100302281	MIR1208
chr8	129162189	129162424	NR_031613	100302281	MIR1208
chr4	22484606	22484828	NR_162129	113219450	MIR12115
chr5	172722669	172722860	NR_162132	113219469	MIR12118
chr14	105339191	105339391	NR_162135	113219454	MIR12121
chr16	85254247	85254520	NR_162142	113219463	MIR12128
chr11	64162096	64162355	NR_031602	100302280	MIR1237
chr2	232582355	232582639	NR_128710	103504734	MIR1244-4
chr1	21248144	21248347	NR_031657	100302155	MIR1256
chr11	121712571	121712762	NR_029671	406911	MIR125B1
chr1	68641888	68642159	NR_031664	100302279	MIR1262
chr8	37005322	37005725	NR_031672	100302233	MIR1268A
chr8	37003203	37003401	NR_031672	100302233	MIR1268A
chr5	132581195	132581411	NR_031621	100302134	MIR1289-2
chr2	25527709	25528013	NR_031570	100302246	MIR1301
chr2	25526444	25526664	NR_031570	100302246	MIR1301
chr1	98569598	98569983	NR_046105	400765	MIR137HG
chr3	44061285	44061500	NR_029700	406929	MIR138-1
chr16	56894246	56894481	NR_029680	406930	MIR138-2
chr5	148845999	148846425	NR_029686	406937	MIR145
chr15	45749017	45749208	NR_030599	100126311	MIR147B
chrX	39714615	39715010	NR_039763	100616251	MIR1587
chrX	39615245	39615594	NR_039763	100616251	MIR1587
chrX	39614702	39614912	NR_039763	100616251	MIR1587
chr9	127487757	127487991	NR_029782	406956	MIR181B2
chr7	129437585	129437776	NR_029615	406959	MIR183
chr17	29886277	29886474	NR_029710	406968	MIR193A
chr1	1093191	1093663	NR_029639	406984	MIR200B
chr10	135072636	135073060	NR_108078	101927671	MIR202HG
chr8	75512215	75512677	NR_033830	441355	MIR2052HG
chr4	111959285	111959483	NR_030643	100126354	MIR297
chr10	6213983	6214288	NR_039698	100628560	MIR3155B
chr6	152421032	152421361	NR_036121	100423029	MIR3163
chr20	50073309	50073699	NR_036162	100422889	MIR3194
chr20	60640119	60640310	NR_130463	100422838	MIR3195
chr12	54608799	54609047	NR_039851	100616400	MIR3198-2
chr22	28490185	28490391	NR_036169	100423034	MIR3199-1
chr22	28508437	28508924	NR_036169	100423034	MIR3199-1
chr1	38605641	38605832	NR_037432	100500801	MIR3659
chr16	14401732	14401934	NR_029854	100126355	MIR365A
chr11	70825683	70825874	NR_037437	100500844	MIR3664
chr2	12317380	12317707	NR_037452	100500884	MIR3681
chr1	95113878	95114085	NR_039620	100616321	MIR378G
chr3	99663227	99663556	NR_037486	100500859	MIR3921
chr3	79647923	79648114	NR_037488	100500877	MIR3923
chrX	39472786	39473320	NR_037501	100500822	MIR3937
chr15	64188868	64189060	NR_029944	494334	MIR422A
chr2	110053081	110053296	NR_036224	100423027	MIR4266
chr2	110053569	110053854	NR_036224	100423027	MIR4266
chr2	221601501	221601703	NR_036228	100422959	MIR4268
chr2	221452135	221452333	NR_036228	100422959	MIR4268
chr2	221093210	221093490	NR_036228	100422959	MIR4268
chr2	220809329	220809545	NR_036228	100422959	MIR4268
chr2	220771976	220772182	NR_036228	100422959	MIR4268
chr2	240233216	240233597	NR_036229	100423043	MIR4269
chr7	101946845	101947036	NR_036245	100422858	MIR4285
chr7	101950574	101950777	NR_036245	100422858	MIR4285
chr9	92770532	92770757	NR_036253	100422963	MIR4290
chr10	131688078	131688269	NR_036179	100422873	MIR4297
chr12	26019955	26020146	NR_036188	100422897	MIR4302
chr13	40429300	40429757	NR_036190	100422940	MIR4305
chr1	22539310	22539593	NR_039613	100616433	MIR4418
chr1	22531734	22531976	NR_039613	100616433	MIR4418
chr1	22577009	22577242	NR_039613	100616433	MIR4418
chr1	31220863	31221102	NR_039616	100616164	MIR4420
chr2	60522325	60522693	NR_132991	106660609	MIR4432HG
chr2	214713792	214713983	NR_039640	100616375	MIR4438
chr12	116796659	116796864	NR_039683	100616309	MIR4472-2
chr11	61263284	61263638	NR_039708	100616470	MIR4488
chr11	118788673	118788964	NR_039713	100616376	MIR4492
chr11	118782331	118782620	NR_039713	100616376	MIR4492
chr11	118782932	118783123	NR_039713	100616376	MIR4492
chr12	109032349	109032557	NR_039717	100616240	MIR4496
chr14	74223152	74223568	NR_039727	100616158	MIR4505
chr16	2178433	2178637	NR_039741	100616258	MIR4516
chr20	59085683	59085880	NR_039758	100616362	MIR4533
chr22	38412784	38413268	NR_039759	100616146	MIR4534
chr22	38412374	38412595	NR_039759	100616146	MIR4534
chr17	74001674	74001985	NR_130467	100616276	MIR4538
chr5	174220961	174221167	NR_039777	100616202	MIR4634
chr6	41546053	41546300	NR_039784	100616178	MIR4641
chr6	44447907	44448163	NR_039785	100616352	MIR4642
chr6	2854737	2854972	NR_039788	100616285	MIR4645
chr6	2855064	2855535	NR_039788	100616285	MIR4645
chr7	4838048	4838249	NR_039800	100616465	MIR4656
chr3	31238674	31238881	NR_130459	100423038	MIR466
chr10	121128692	121129223	NR_039829	100616398	MIR4681
chr15	99262008	99262199	NR_039864	100616432	MIR4714
chr15	99342830	99343063	NR_039864	100616432	MIR4714
chr15	99320092	99320285	NR_039864	100616432	MIR4714
chr16	81434755	81435072	NR_039871	100616150	MIR4720
chr17	58114454	58114726	NR_039890	100616210	MIR4737
chr18	46579834	46580092	NR_039898	100616420	MIR4744
chr3	87234665	87234930	NR_039958	100616161	MIR4795
chr4	7367827	7368033	NR_039961	100616471	MIR4798
chr4	7328806	7329057	NR_039961	100616471	MIR4798
chr12	95186849	95187166	NR_030171	574449	MIR492
chr5	172086669	172086939	NR_049799	100847029	MIR5003
chr1	228074570	228074865	NR_049806	100847072	MIR5008
chr17	65464036	65464261	NR_037517	100500895	MIR548AA2
chr2	184869179	184869370	NR_039638	100616305	MIR548AE1
chr20	59109577	59109802	NR_039653	100616440	MIR548AG2
chr12	122027970	122028219	NR_049838	100847078	MIR548AQ
chr2	107790826	107791021	NR_049853	100847045	MIR548AU
chr3	60630503	60630883	NR_128708	103504735	MIR548BB
chr17	65525019	65525294	NR_030385	693131	MIR548D2
chr4	148233835	148234048	NR_031662	100313938	MIR548G
chr2	11919178	11919420	NR_036071	100422862	MIR548S
chr12	65073351	65073622	NR_037515	100500856	MIR548Z
chr1	168311853	168312081	NR_030284	693142	MIR557
chr5	95562621	95562812	NR_030309	693168	MIR583
chr5	148349757	148349969	NR_030310	693169	MIR584
chr2	86011872	86012174	NR_106719	102466516	MIR6071
chr17	62772767	62773003	NR_106728	102464831	MIR6080
chr11	12245804	12246153	NR_106739	102466906	MIR6124
chr12	115890059	115890311	NR_030351	693205	MIR620
chr15	70354514	70355333	NR_030714	693214	MIR629
chr17	64609530	64609865	NR_030364	693219	MIR634
chr16	81634877	81635120	NR_106759	102465251	MIR6504
chr1	8925534	8925868	NR_106786	102465436	MIR6728
chr1	228503563	228504203	NR_106800	102465444	MIR6742
chr11	71199421	71199613	NR_106812	102466728	MIR6754
[truncated: 1,234 more rows]

## Sheet: Tab3. GSEA TADs and Loops
Supplementary Table S5, Tab3. GSEA of Genes in Downregulated TADs and Loops with PFI-90 Treatment vs DMSO
GSEA of genes in decreased TADs and loops PFI-90 vs DMSO (FDR <0.05)
Gene Set	Odds Ratio	NOM p-val	FDR q-val
WANG_SMARCE1_TARGETS_DN	2.02952	0.000127903	0.00232164
KUROKI_KDM3B_DOWN	3.0703	0.000146188	0.00257549
Exhaustion	2.41243	0.000165522	0.00283279
HALLMARK_TNFA_SIGNALING_VIA_NFKB	2.40604	0.000227798	0.0037903
RMS119_V550E_ratio_down	1.99799	0.000244958	0.00396567
CAF_PMID_30127393_pos	4.30064	0.000342856	0.00526592
EIF4E_DN	3.08304	0.000334617	0.00526592
HET70_Positive	3.58982	0.000388348	0.00581551
LU_EZH2_TARGETS_DN	1.84782	0.000570604	0.00833638
Supressed EWSFLI1 Target Genes Ranked by Changes in Gene Expression and H3K27ac Signals_Rivera	3.01556	0.000630097	0.00898638
HALLMARK_HEDGEHOG_SIGNALING	4.85759	0.000672539	0.00936862
MIYAGAWA_TARGETS_OF_EWSR1_ETS_FUSIONS_UP	2.056	0.000897862	0.0122232
REN_ALVEOLAR_RHABDOMYOSARCOMA_UP	2.87468	0.000952775	0.0126825
CORDENONSI_YAP_CONSERVED_SIGNATURE	3.672	0.000994391	0.0129487
PF19 vs NILC_microarray_PAX3FOXO1A_down	2.02952	0.00106661	0.0135936
DAVICIONI_PAX_FOXO1_SIGNATURE_IN_ARMS_UP	3.59692	0.00114034	0.0142305
REN_ALVEOLAR_RHABDOMYOSARCOMA_DN	1.76378	0.00161623	0.0197576
ASPS_Patient_1_Array_up	1.89844	0.00180752	0.0216541
NS143_Spleen_down	1.89136	0.00190006	0.0218872
NS75_Kidney_Up	1.89136	0.00190006	0.0218872
RMS772_deltaPA_ratio_FGFR4_WT_down	1.77071	0.00226566	0.0256062
IMR32-34a-48H-1_down	1.75894	0.00284514	0.03156
RIGGI_EWING_SARCOMA_PROGENITOR_DN	2.10511	0.00298183	0.0324748
BRD4_YAPTAZ_JQ1_DOWN	1.69579	0.00330886	0.035393
DAVICIONI_TARGETS_OF_PAX_FOXO1_FUSIONS_DN	2.98567	0.00379577	0.0393896
KONDO_EZH2_TARGETS	1.91359	0.00381402	0.0393896
EBAUER_TARGETS_OF_PAX3_FOXO1_FUSION_DN	3.51981	0.00388895	0.0394827
DAVICIONI_PAX_FOXO1_SIGNATURE_IN_ARMS_DN	5.49047	0.00449752	0.0423145
KINSEY_TARGETS_OF_EWSR1_FLII_FUSION_UP	1.37027	0.00437134	0.0423145
MAHADEVAN_IMATINIB_RESISTANCE_DN	5.49047	0.00449752	0.0423145
P53_DN.V1_UP	2.02017	0.00452108	0.0423145
Stromal141_UP	2.24199	0.0042733	0.0423145
DAVICIONI_MOLECULAR_ARMS_VS_ERMS_UP	1.73753	0.00494921	0.0456089
GRYDER_PAX3FOXO1_CRC	3.73071	0.00513944	0.0466444
SENESE_HDAC1_AND_HDAC2_TARGETS_UP	1.88357	0.00537876	0.0473805
TRM	2.3298	0.00533956	0.0473805
Targets of PAX3 FOXO1_Meltzer_ChipSeq	2.98936	0.00583453	0.0506504

## Sheet: Tab4. Total RNA Pol2 GSEA
Supplementary Table S5, Tab4. GSEA of Genes Associated with Total RNA Pol2 after PFI-90 Treatment vs DMSO
Total RNA Pol2 PFI-90 vs DMSO: Upregulated (FDR <0.05)					Total RNA Pol2 PFI-90 vs DMSO: Downregulated (FDR <0.05)
Gene Set	NES	NOM p-val	FDR q-val		Gene Set	NES	NOM p-val	FDR q-val
NK CELLS RESTING	2.16153	0	0.0101351		KEGG_RIBOSOME	-2.06883	0	5.30485e-05
DE_YY1_TARGETS_UP	1.81529	0	0.0239865		REACTOME_TRANSLATION	-1.90114	0	0.00025192
					DEPMAP_COMMON_ESSENTIALS	-1.77594	0	0.00191269
					ROSTY_CERVICAL_CANCER_PROLIFERATION_CLUSTER	-1.75543	0	0.00227714
					CORRELATES WITH CAMTA1_PEDIATRIC AFFY TUMOR DB_NEGATIVE	-1.73987	0	0.00273913
					CINSARC	-1.73596	0	0.00270337
					WU_APOPTOSIS_BY_CDKN1A_VIA_TP53	-1.72754	0	0.00287025
					CEGV2	-1.70385	0	0.0041724
					G2M_PHASE_REGEV	-1.70054	0	0.00438071
					REACTOME_MRNA_SPLICING	-1.68695	0	0.00492739
					MANALO_HYPOXIA_DN	-1.6856	0	0.0048198
					HALLMARK_MYC_TARGETS_V1	-1.67117	0	0.00541199
					FOXM1_UP	-1.66617	0	0.00558258
					PCNA25_POSITIVE	-1.66428	0.00204082	0.0055257
					KEGG_SPLICEOSOME	-1.644	0	0.0070873
					KANG_DOXORUBICIN_RESISTANCE_UP	-1.63883	0	0.00733582
					GO_METHYLTRANSFERASE_COMPLEX	-1.63821	0	0.00714814
					HALLMARK_E2F_TARGETS	-1.62669	0	0.00795568
					HSIAO_HOUSEKEEPING_GENES	-1.62536	0	0.00792084
					LNCRNA_X_POSITIVE_RNASEQ	-1.62296	0	0.00793946
					REN_BOUND_BY_E2F	-1.62119	0	0.00803302
					MOLENAAR_TARGETS_OF_CCND1_AND_CDK4_DN	-1.62081	0	0.00782704
					REACTOME_RNA_POL_II_TRANSCRIPTION	-1.62013	0	0.00770298
					BOYAULT_LIVER_CANCER_SUBCLASS_G12_UP	-1.61217	0	0.0083089
					CHROMATIN	-1.60228	0.00100705	0.00909013
					BENPORATH_MYC_TARGETS_WITH_EBOX	-1.59461	0	0.00976993
					HALLMARK_DNA_REPAIR	-1.59348	0	0.00963481
					WHITFIELD_CELL_CYCLE_G1_S	-1.59098	0	0.00986744
					PUJANA_CHEK2_PCC_NETWORK	-1.58835	0	0.00994418
					HALLMARK_G2M_CHECKPOINT	-1.58348	0	0.010608
					GRYDER_PAX3FOXO1_CRC	-1.58054	0	0.0108253
					NS143_SPLEEN_DOWN	-1.5726	0	0.0117173
					G2M_AZIZI	-1.571	0.00616016	0.011655
					NS4_ADRENAL_DOWN	-1.56227	0	0.0126835
					PAX3FOXO1_INTERACTORS_NONNUCLEAR	-1.54831	0.0199161	0.0148138
					NS132_SKELETAL MUSCLE_DOWN	-1.54013	0	0.0164117
					BRD4_YAPTAZ_JQ1_DOWN	-1.53721	0	0.0165688
					WHITEFORD_PEDIATRIC_CANCER_MARKERS	-1.53697	0.001	0.0163025
					TRI70_NEGATIVE	-1.52045	0.002	0.0197037
					RMS_ROC	-1.51984	0	0.0195928
					GARCIA_TARGETS_OF_FLI1_AND_DAX1_DN	-1.51749	0	0.0198487
					JMJD6_INTERACTORS	-1.51145	0	0.0210855
					S_PHASE_REGEV	-1.51026	0.00200803	0.0211165
					T REGULATORY_PMID_30127393_NEG	-1.50725	0.001002	0.0217113
					WEST_ADRENOCORTICAL_TUMOR_MARKERS_UP	-1.507	0.0204082	0.0214845
					FERNANDEZ_BOUND_BY_MYC	-1.50323	0	0.0224656
					BENPORATH_PROLIFERATION	-1.50243	0	0.0222641
					HALLMARK_OXIDATIVE_PHOSPHORYLATION	-1.5007	0	0.0222454
					BLUM_RESPONSE_TO_SALIRASIB_DN	-1.50016	0	0.0220967
					ZEMBUTSU_SENSITIVITY_TO_VINBLASTINE	-1.49717	0.00827301	0.022652
					PAL_PRMT5_TARGETS_UP	-1.48668	0	0.0255406
					BENPORATH_CYCLING_GENES	-1.4841	0	0.0260437
					WEI_MYCN_TARGETS_WITH_E_BOX	-1.48065	0	0.0267516
					FERREIRA_EWINGS_SARCOMA_UNSTABLE_VS_STABLE_UP	-1.47893	0	0.0268869
					DAVICIONI_PAX_FOXO1_SIGNATURE_IN_ARMS_UP	-1.47265	0.004	0.0287732
					NS83_LIVER_DOWN	-1.46732	0	0.0303452
					PAX3FOXO1_INTERACTORS_NUCLEAR	-1.46433	0	0.0311763
					HIF1AN_INTERACTORS_RODRIGUEZ	-1.46421	0.001	0.0308116
					TARGETS OF PAX3 FOXO1_MELTZER_CHIPSEQ	-1.46263	0.00200401	0.0309725
					HALLMARK_MTORC1_SIGNALING	-1.45874	0	0.0319866
					SYMPATHETIC GANGLIA_A26MG_DOWN	-1.45058	0	0.0350849
					EIF4E_UP	-1.44798	0	0.0356947
					WHITFIELD_CELL_CYCLE_S	-1.44723	0	0.035464
					GSKJ4_24H_DOWN	-1.44485	0.00603015	0.0360065
					NUYTTEN_EZH2_TARGETS_DN	-1.443	0	0.0363026
					TANG_SENESCENCE_TP53_TARGETS_DN	-1.44142	0.01002	0.0366267
					WHITFIELD_CELL_CYCLE_G2	-1.44015	0	0.0365776
					UDAYAKUMAR_MED1_TARGETS_UP	-1.43039	0	0.0404589
					EGLN3_INTERACTORS	-1.42891	0	0.0406116
					MITOCHONDRIA_PROTEOME_V1	-1.42857	0.001	0.0402657
					PID_P53_REGULATION_PATHWAY	-1.42853	0.008	0.0398517
					JACKSON_DNMT1_TARGETS_DN	-1.42703	0.0243902	0.0400815
					PEART_HDAC_PROLIFERATION_CLUSTER_DN	-1.42518	0.005005	0.0404231
					DAVICIONI_RHABDOMYOSARCOMA_PAX_FOXO1_FUSION_UP	-1.42517	0.00200401	0.0399789
					SHEN_SMARCA2_TARGETS_UP	-1.42427	0	0.0400746
					BASAKI_YBX1_TARGETS_UP	-1.42101	0	0.0410635
					RAS_GTPASE_ACTIVATOR_ACTIVITY	-1.41676	0.0263692	0.0427234
					HALLMARK_UNFOLDED_PROTEIN_RESPONSE	-1.41609	0	0.0427366
					KAMMINGA_EZH2_TARGETS	-1.40664	0.0120482	0.0477437
					RMS_CORRELATE_WITH_FGFR4	-1.40177	0	0.0500531

## Sheet: Tab5. RNA Pol2 Ser5 GSEA
Supplementary Table S5, Tab2. GSEA of Genes Associated with RNA Pol2 Ser5 after PFI-90 Treatment vs DMSO
RNA Pol2 Ser5 PFI-90 vs DMSO: Upregulated (FDR <0.05)					RNA Pol2 Ser5 PFI-90 vs DMSO: Downregulated (FDR <0.05)
Gene Set	NES	NOM p-val	FDR q-val		Gene Set	NES	NOM p-val	FDR q-val
MAHADEVAN_IMATINIB_RESISTANCE_DN	1.51632	0	0.0276753		KEGG_RIBOSOME	-1.85868	0	0.000252617
					S_PHASE_REGEV	-1.85746	0	0.000239986
					FOXM1_UP	-1.8295	0	0.000548325
					KANG_DOXORUBICIN_RESISTANCE_UP	-1.81039	0	0.000828948
					ROSTY_CERVICAL_CANCER_PROLIFERATION_CLUSTER	-1.7696	0	0.00154444
					DEPMAP_COMMON_ESSENTIALS	-1.76541	0	0.00159991
					REACTOME_TRANSLATION	-1.76195	0	0.00157425
					CEGV2	-1.74647	0	0.00214152
					MANALO_HYPOXIA_DN	-1.73473	0	0.00234661
					REACTOME_RNA_POL_II_TRANSCRIPTION	-1.73138	0	0.00243416
					LNCRNA_X_POSITIVE_RNASEQ	-1.72864	0	0.00241633
					PUJANA_CHEK2_PCC_NETWORK	-1.71749	0	0.00255974
					HALLMARK_E2F_TARGETS	-1.71153	0	0.00269384
					REACTOME_P53_INDEPENDENT_G1_S_DNA_DAMAGE_CHECKPOINT	-1.69334	0	0.00311954
					NS4_ADRENAL_DOWN	-1.67966	0	0.0036652
					CINSARC	-1.67682	0	0.00364208
					HALLMARK_OXIDATIVE_PHOSPHORYLATION	-1.66292	0	0.00425098
					MOLENAAR_TARGETS_OF_CCND1_AND_CDK4_DN	-1.64819	0	0.00509281
					KEGG_SPLICEOSOME	-1.64165	0	0.00536996
					REACTOME_MRNA_SPLICING	-1.63827	0	0.00548126
					ELVIDGE_HYPOXIA_DN	-1.62739	0	0.00622691
					HALLMARK_G2M_CHECKPOINT	-1.62464	0	0.00628731
					CORRELATES WITH CAMTA1_PEDIATRIC AFFY TUMOR DB_NEGATIVE	-1.61499	0	0.00723457
					HALLMARK_MYC_TARGETS_V1	-1.60987	0	0.00765683
					GARCIA_TARGETS_OF_FLI1_AND_DAX1_DN	-1.60307	0	0.00808174
					WEI_MYCN_TARGETS_WITH_E_BOX	-1.59921	0	0.00848709
					MOOTHA_VOXPHOS	-1.58776	0	0.00959957
					WHITFIELD_CELL_CYCLE_G1_S	-1.58486	0	0.00970406
					WU_APOPTOSIS_BY_CDKN1A_VIA_TP53	-1.58467	0	0.00953845
					PAX3FOXO1_INTERACTORS_NUCLEAR	-1.58105	0	0.00983974
					REACTOME_P53_DEPENDENT_G1_DNA_DAMAGE_RESPONSE	-1.57902	0	0.00991316
					TRI70_NEGATIVE	-1.57859	0.001	0.00977244
					HSIAO_HOUSEKEEPING_GENES	-1.57043	0	0.0105032
					G2M_PHASE_REGEV	-1.56769	0.001	0.0105782
					HALLMARK_DNA_REPAIR	-1.56518	0	0.0107953
					BRD4_JMJD6_POSITIVELY_REGULATED	-1.56344	0	0.0109155
					PAX3FOXO1_INTERACTORS_NONNUCLEAR	-1.56329	0.0162933	0.0107345
					SYMPATHETIC GANGLIA_A26MG_DOWN	-1.56281	0	0.0106456
					KEGG_PROTEASOME	-1.55839	0.003	0.0110987
					BRD4_YAPTAZ_JQ1_DOWN	-1.55621	0	0.0114039
					PODAR_RESPONSE_TO_ADAPHOSTIN_DN	-1.55315	0.00919305	0.0114223
					NS132_SKELETAL MUSCLE_DOWN	-1.54639	0	0.012496
					JMJD6_INTERACTORS	-1.54519	0	0.0124484
					WHITEFORD_PEDIATRIC_CANCER_MARKERS	-1.54268	0	0.0126501
					BLUM_RESPONSE_TO_SALIRASIB_DN	-1.53912	0	0.0129216
					WANG_RESPONSE_TO_GSK3_INHIBITOR_SB216763_DN	-1.53734	0	0.0129747
					REN_BOUND_BY_E2F	-1.53641	0	0.012908
					T EXHAUST_PMID_30127393_NEG	-1.53574	0	0.012756
					GRYDER_PAX3FOXO1_ENHANCERS_IN_TADS	-1.53249	0	0.0129239
					REACTOME_REGULATION_OF_MRNA_STABILITY_BY_PROTEINS_THAT_BIND_AU_RICH_ELEMENTS	-1.53182	0	0.0128185
					SHEN_SMARCA2_TARGETS_UP	-1.52939	0	0.013092
					WHITFIELD_CELL_CYCLE_S	-1.52927	0	0.0129187
					WHITFIELD_CELL_CYCLE_G2	-1.52818	0	0.012953
					BENPORATH_PROLIFERATION	-1.5275	0	0.0128664
					PAL_PRMT5_TARGETS_UP	-1.5269	0	0.0127953
					NS143_SPLEEN_DOWN	-1.52163	0	0.0134395
					DAVICIONI_RHABDOMYOSARCOMA_PAX_FOXO1_FUSION_DN	-1.52146	0.011213	0.013286
					KAMMINGA_EZH2_TARGETS	-1.51828	0.001	0.013528
					BENPORATH_CYCLING_GENES	-1.51485	0	0.0140753
					GRYDER_PAX3FOXO1_TOP_ENHANCERS	-1.51471	0	0.0139317
					WONG_MITOCHONDRIA_GENE_MODULE	-1.51288	0	0.0140833
					MITOCHONDRIA_PROTEOME_V1	-1.51016	0	0.0142913
					PID_P53_REGULATION_PATHWAY	-1.50506	0.002	0.0152049
					HALLMARK_MITOTIC_SPINDLE	-1.50263	0	0.0154644
					MYCN_SIRNA_IMR32-Q3MYCN-48H_DOWN	-1.50128	0	0.0155324
					GRYDER_PAX3FOXO1_ENHANCERS_KO_DOWN	-1.50032	0	0.0156103
					CHROMATIN	-1.49703	0.00600601	0.0159349
					NUYTTEN_EZH2_TARGETS_DN	-1.49243	0	0.0165976
					EGLN3_INTERACTORS	-1.49166	0	0.0165503
					FERREIRA_EWINGS_SARCOMA_UNSTABLE_VS_STABLE_UP	-1.49028	0	0.0165693
					HALLMARK_MTORC1_SIGNALING	-1.47964	0	0.0188207
					KEGG_P53_SIGNALING_PATHWAY	-1.4791	0.002	0.0186756
					VANOEVELEN_MYOGENESIS_SIN3A_TARGETS	-1.47792	0	0.0187024
					NS83_LIVER_DOWN	-1.46921	0	0.02069
					DAVICIONI_PAX_FOXO1_SIGNATURE_IN_ARMS_DN	-1.46545	0.0191532	0.0213865
					AMUNDSON_DNA_DAMAGE_RESPONSE_TP53	-1.4633	0.0287474	0.0216084
					BASAKI_YBX1_TARGETS_UP	-1.45798	0	0.0227756
					WEST_ADRENOCORTICAL_TUMOR_MARKERS_UP	-1.45589	0.0261569	0.0231281
					UDAYAKUMAR_MED1_TARGETS_UP	-1.45302	0	0.0237409
					BIOCARTA_P53_PATHWAY	-1.45194	0.0297131	0.0238315
					REACTOME_RESPIRATORY_ELECTRON_TRANSPORT_ATP_SYNTHESIS	-1.44684	0.001	0.0251517
					KANG_DOXORUBICIN_RESISTANCE_DN	-1.44683	0.0223124	0.0249002
					LASTOWSKA_NEUROBLASTOMA_COPY_NUMBER_DN	-1.44577	0	0.0249388
					RAS_GTPASE_BINDING	-1.44278	0.0211055	0.0257482
					HIF1AN_INTERACTORS_RODRIGUEZ	-1.44139	0	0.025927
					GO_METHYLTRANSFERASE_COMPLEX	-1.44132	0.001	0.0256962
					MARTIN_INTERACT_WITH_HDAC	-1.4406	0.001	0.0257166
					GRYDER_PAX3FOXO1_CRC	-1.43542	0.014	0.027095
					GSKJ4_24H_DOWN	-1.43537	0.008	0.0268598
					BRD4_INTERACTORS_BIOGRID	-1.43515	0	0.0266644
					T REGULATORY_PMID_30127393_NEG	-1.433	0.008	0.0270627
					BOYAULT_LIVER_CANCER_SUBCLASS_G12_UP	-1.42946	0.019	0.0278378
					RMS_CORRELATE_WITH_FGFR4	-1.4272	0	0.0282787
					JIB04_24H_DOWN	-1.42638	0	0.0282491
					MARIADASON_REGULATED_BY_HISTONE_ACETYLATION_DN	-1.42356	0.011	0.0288824
					NOUZOVA_TRETINOIN_AND_H4_ACETYLATION	-1.41293	0.001	0.0327972
					ROME_INSULIN_TARGETS_IN_MUSCLE_UP	-1.41115	0	0.0331213
					PEART_HDAC_PROLIFERATION_CLUSTER_DN	-1.40716	0.005	0.0343832
					V$MYCMAX_01	-1.40514	0	0.0348524
					KAYO_AGING_MUSCLE_DN	-1.40154	0.001	0.0361268
					WHITFIELD_CELL_CYCLE_G2_M	-1.39371	0	0.0391225
					PCNA25_POSITIVE	-1.39312	0.0433031	0.0391083
					GRYDER_PAX3FOXO1_JQ1	-1.3894	0.004	0.0402527
					LASTOWSKA_NEUROBLASTOMA_COPY_NUMBER_UP	-1.38308	0	0.04303
					RMS_ROC	-1.38208	0	0.0431016
					SENESE_HDAC2_TARGETS_UP	-1.38172	0.002	0.0429243
					FISCHER_DIRECT_P53_TARGETS_META_ANALYSIS	-1.37844	0	0.0442702
					IMR32-34A-48H-2_DOWN	-1.3748	0	0.0460444
					EXPRESSED SOMATIC MUTATIONS_RMS	-1.37298	0	0.0466418
					REACTOME_SIGNALLING_TO_RAS	-1.3723	0.0351053	0.0465924
					HIF1AN_INTERACTORS_BIOGRID	-1.36831	0.01	0.0482178
					RAS_GTPASE_ACTIVATOR_ACTIVITY	-1.36718	0.039196	0.048445
