# Supplementary material for: KDM3B inhibitors disrupt PAX3-FOXO1 oncogenic activity in fusion positive rhabdomyosarcoma.
Source: Research Square preprint supplement (doi:10.21203/rs.3.rs-2298627/v1), 2022-11-29
Supplement: Supplementary file 2 [file 08f4478ded73c842a13da499.xlsx]

## Sheet: Tab1. GSEA Group PFI90 vs DMSO
Supplementary Table S6, Tab1. GSEA of 2 PFI-90 Treated Mice Tumors vs 2 DMSO Treated Mice Tumors.
GSEA Group PFI-90 vs DMSO Difference of Classess Analysis - PFI-90 Positive Enrichment (FDR <0.05)					GSEA Group PFI-90 vs DMSO Difference of Classess Analysis - PFI-90 Negative Enrichment (FDR <0.05)
Gene Set	NES	NOM p-val	FDR q-val		Gene Set	NES	NOM p-val	FDR q-val
KEGG_RIBOSOME	3.18938	0	0		HALLMARK_MITOTIC_SPINDLE	-2.14183	0	0
REACTOME_TRANSLATION	2.98963	0	0		PAX3FOXO1_INTERACTORS_NUCLEAR	-2.06149	0	0.000420513
HALLMARK_OXIDATIVE_PHOSPHORYLATION	2.81376	0	0		EGLN3_INTERACTORS	-1.89304	0	0.00357798
MOOTHA_VOXPHOS	2.74807	0	0		WHITFIELD_CELL_CYCLE_S	-1.82983	0	0.00728845
REACTOME_RESPIRATORY_ELECTRON_TRANSPORT_ATP_SYNTHESIS	2.72547	0	0		BRD4_JMJD6_NEGATIVELY_REGULATED	-1.80634	0	0.00842741
HSIAO_HOUSEKEEPING_GENES	2.6738	0	0		PROTEIN_KINASE_ACTIVITY	-1.79578	0	0.00829587
WONG_MITOCHONDRIA_GENE_MODULE	2.6117	0	0		WHITFIELD_CELL_CYCLE_G1_S	-1.6974	0	0.0282616
JIB04_24H_UP	2.30419	0	0		PODAR_RESPONSE_TO_ADAPHOSTIN_DN	-1.69197	0.00522648	0.0262833
KEGG_GLYCOLYSIS_GLUCONEOGENESIS	2.25699	0	0		HIF1AN_INTERACTORS_BIOGRID	-1.6705	0.0015748	0.0312241
DEPMAP_COMMON_ESSENTIALS	2.20271	0	0		RMS_CORRELATE_WITH_FGFR4	-1.66148	0	0.0311682
HALLMARK_HYPOXIA	2.16469	0	0		BRD4_INTERACTORS_BIOGRID	-1.65223	0	0.0317669
LU_EZH2_TARGETS_UP	2.12172	0	0		WANG_KDM3B_UP	-1.63271	0	0.0357209
ELVIDGE_HYPOXIA_BY_DMOG_UP	2.06498	0	0		HALLMARK_G2M_CHECKPOINT	-1.63092	0	0.0336484
MITOCHONDRIA_PROTEOME_V1	2.05703	0	0		LU_EZH2_TARGETS_DN	-1.59303	0	0.0475799
HALLMARK_GLYCOLYSIS	2.04169	0	0
HIF1AN_METABOLIC	2.01493	0	0
HALLMARK_MYC_TARGETS_V1	2.00001	0	0
KUROKI_KDM3B_UP	1.95558	0	0.000468032
EBAUER_MYOGENIC_TARGETS_OF_PAX3_FOXO1_FUSION	1.87774	0	0.00231277
NS132_SKELETAL_MUSCLE_UP	1.82966	0	0.00381067
REACTOME_POST_TRANSLATIONAL_PROTEIN_MODIFICATION	1.82958	0	0.00362921
BAE_BRCA1_TARGETS_UP	1.80548	0	0.00454526
REN_ALVEOLAR_RHABDOMYOSARCOMA_DN	1.77995	0	0.0059102
EBAUER_TARGETS_OF_PAX3_FOXO1_FUSION_UP	1.76156	0	0.00733259
MOREIRA_RESPONSE_TO_TSA_UP	1.7488	0.00487805	0.00783348
GO_CELLULAR_RESPONSE_TO_ZINC_ION	1.73211	0.00423729	0.00894261
EIF4E_UP	1.73162	0	0.00865873
DALESSIO_TSA_RESPONSE	1.72982	0.00501253	0.00859456
HALLMARK_MTORC1_SIGNALING	1.71743	0	0.00954577
GBM_PAUSE_CONTROLLED_GENES	1.68562	0.00255754	0.0130584
MITOCHONDRIA_PROTEOME_V2	1.68128	0.00246914	0.0130162
PASINI_SUZ12_TARGETS_DN	1.67606	0	0.0135823
REACTOME_MUSCLE_CONTRACTION	1.67263	0.00511509	0.0133866
HALLMARK_MYOGENESIS	1.64677	0	0.0170412
HALLMARK_REACTIVE_OXYGEN_SPECIES_PATHWAY	1.6355	0.00507614	0.0185426
PAL_PRMT5_TARGETS_DN	1.63228	0.00696056	0.0187318
PEART_HDAC_PROLIFERATION_CLUSTER_UP	1.61616	0	0.0218987
PODAR_RESPONSE_TO_ADAPHOSTIN_UP	1.59825	0	0.0258948
HALLMARK_P53_PATHWAY	1.59071	0	0.0273932
HALLMARK_APOPTOSIS	1.58302	0	0.0283603
ROME_INSULIN_TARGETS_IN_MUSCLE_UP	1.58008	0	0.0281925
GSKJ4_6H_UP	1.57829	0.0107239	0.0279462
KIM_RESPONSE_TO_TSA_AND_DECITABINE_UP	1.5771	0	0.0277599
RH4_PLX1_DOWN	1.54045	0	0.0370275
JMJD6_INTERACTORS	1.54016	0	0.0362666
JIB04_4H_UP	1.52986	0	0.0390768
KUNINGER_IGF1_VS_PDGFB_TARGETS_UP	1.52966	0.00813008	0.0383358
REACTOME_P53_INDEPENDENT_G1_S_DNA_DAMAGE_CHECKPOINT	1.51978	0.0112045	0.0404437

## Sheet: Tab2. Mouse 920 PFI90 vs DMSO
Supplementary Table S6, Tab2. GSEA of PFI-90 Treated Mouse #920 tumor vs DMSO Treated Mice Tumor
Mouse 920 PFI-90 vs DMSO: Upregulated (FDR <0.05)					Mouse 920 PFI-90 vs DMSO: Downregulated (FDR <0.05)
Gene Set	NES	NOM p-val	FDR q-val		Gene Set	NES	NOM p-val	FDR q-val
ELVIDGE_HYPOXIA_BY_DMOG_UP	3.31643	0	0		PAX3FOXO1_INTERACTORS_NUCLEAR	-2.22404	0	0.00100901
HALLMARK_HYPOXIA	3.17472	0	0		MANALO_HYPOXIA_DN	-2.13952	0	0.00101827
KEGG_RIBOSOME	3.15497	0	0		HALLMARK_MITOTIC_SPINDLE	-1.93469	0	0.0115738
NS132_SKELETAL_MUSCLE_UP	2.94874	0	0		HALLMARK_G2M_CHECKPOINT	-1.91303	0	0.0121239
JIB04_4H_UP	2.91632	0	0		ELVIDGE_HYPOXIA_DN	-1.89498	0	0.0123311
REACTOME_TRANSLATION	2.90107	0	0		EGLN3_INTERACTORS	-1.87295	0	0.0134521
JIB04_24H_UP	2.77354	0	0		JIB04_24H_DOWN	-1.86524	0	0.0127548
HALLMARK_MYOGENESIS	2.76882	0	0		PODAR_RESPONSE_TO_ADAPHOSTIN_DN	-1.79157	0.00429185	0.0219588
EBAUER_MYOGENIC_TARGETS_OF_PAX3_FOXO1_FUSION	2.6005	0	0		REACTOME_MRNA_SPLICING	-1.77634	0	0.0215421
EBAUER_TARGETS_OF_PAX3_FOXO1_FUSION_UP	2.58531	0	0		HALLMARK_E2F_TARGETS	-1.67747	0	0.0476902
HALLMARK_GLYCOLYSIS	2.56876	0	0
KUNINGER_IGF1_VS_PDGFB_TARGETS_UP	2.51679	0	0
MOOTHA_VOXPHOS	2.42572	0	0
HIF1AN_METABOLIC	2.37544	0	0
REACTOME_RESPIRATORY_ELECTRON_TRANSPORT_ATP_SYNTHESIS	2.34253	0	0
HSIAO_HOUSEKEEPING_GENES	2.319	0	0
DALESSIO_TSA_RESPONSE	2.26051	0	0
GBM_PAUSE_CONTROLLED_GENES	2.25103	0	0
KEGG_GLYCOLYSIS_GLUCONEOGENESIS	2.21253	0	5.34171e-05
KUROKI_KDM3B_UP	2.19697	0	5.07463e-05
DELASERNA_MYOD_TARGETS_UP	2.19192	0	4.83298e-05
BAE_BRCA1_TARGETS_UP	2.16911	0	9.41782e-05
REACTOME_MUSCLE_CONTRACTION	2.1461	0	9.00835e-05
PODAR_RESPONSE_TO_ADAPHOSTIN_UP	2.1123	0	0.000173287
WONG_MITOCHONDRIA_GENE_MODULE	2.0566	0	0.000166356
RH4_PLX1_DOWN	2.04978	0	0.000199785
HALLMARK_OXIDATIVE_PHOSPHORYLATION	2.03299	0	0.000306142
LIN_REST_UP	2.02547	0	0.000443709
PASINI_SUZ12_TARGETS_DN	1.9951	0	0.000752674
GO_DIOXYGENASE_ACTIVITY	1.98333	0	0.000796621
KASLER_HDAC7_TARGETS_1_DN	1.94025	0.00183486	0.00124493
GSKJ4_24H_UP	1.93453	0	0.00124049
BASAKI_YBX1_TARGETS_DN	1.93038	0	0.00129681
NISHIBUCHI_CHD4_UP	1.90787	0	0.00153441
HALLMARK_EPITHELIAL_MESENCHYMAL_TRANSITION	1.90412	0	0.00149057
NISHIBUCHI_SIN3B_DN	1.89767	0	0.0014775
KUROKI_KDM3B_DOWN	1.88599	0	0.00176817
RH4_BRD4_UP	1.87806	0	0.00199951
LU_EZH2_TARGETS_UP	1.87122	0	0.00227134
REN_ALVEOLAR_RHABDOMYOSARCOMA_UP	1.81843	0	0.00421911
SENESE_HDAC2_TARGETS_DN	1.812	0	0.00439877
HALLMARK_P53_PATHWAY	1.81101	0	0.00434143
KINSEY_TARGETS_OF_EWSR1_FLII_FUSION_DN	1.79132	0	0.00519086
NISHIBUCHI_KDM5A_DN	1.7777	0	0.00581298
DAVICIONI_TARGETS_OF_PAX_FOXO1_FUSIONS_DN	1.77413	0.00169492	0.00589383
KASLER_HDAC7_TARGETS_2_DN	1.75261	0.00541516	0.00754784
DEPMAP_COMMON_ESSENTIALS	1.75148	0	0.00749964
SP2509_LSD1_INHIBITOR_INDUCED	1.72012	0.00491803	0.0103271
CORDENONSI_YAP_CONSERVED_SIGNATURE	1.71501	0.00350877	0.0107945
SENESE_HDAC1_AND_HDAC2_TARGETS_DN	1.65456	0	0.0189262
TORCHIA_TARGETS_OF_EWSR1_FLI1_FUSION_TOP20_DN	1.64143	0.0130354	0.0213283
INGA_TP53_TARGETS	1.63811	0.0271739	0.0217649
DAVICIONI_RHABDOMYOSARCOMA_PAX_FOXO1_FUSION_DN	1.63545	0.0147874	0.0218239
SENESE_HDAC1_TARGETS_DN	1.63369	0	0.0216856
CONCANNON_APOPTOSIS_BY_EPOXOMICIN_DN	1.62423	0.00158983	0.0230855
PAL_PRMT5_TARGETS_DN	1.6225	0.0201465	0.0231738
MIYAGAWA_TARGETS_OF_EWSR1_ETS_FUSIONS_DN	1.61182	0.00147275	0.0252768
AN_KDM3B_UP	1.61142	0	0.0248954
MITOCHONDRIA_BCO2_KO_DOWN	1.60507	0.0223048	0.0260701
HALLMARK_MTORC1_SIGNALING	1.59641	0	0.0276101
HENDRICKS_SMARCA4_TARGETS_UP	1.58986	0.0106383	0.0284255
HALLMARK_REACTIVE_OXYGEN_SPECIES_PATHWAY	1.57352	0.0160714	0.0325309
DAVICIONI_PAX_FOXO1_SIGNATURE_IN_ARMS_DN	1.57181	0.028463	0.0324786
GSKJ4_6H_UP	1.53357	0.0238095	0.0438391
MITOCHONDRIA_PROTEOME_V2	1.53184	0.033275	0.0437571
HALLMARK_APOPTOSIS	1.51845	0.0126183	0.0479149

## Sheet: Tab3. Mouse 924 PFI90 vs DMSO
Supplementary Table S6, Tab3. GSEA of PFI-90 Treated Mouse #924 tumor vs DMSO Treated Mice Tumor
Mouse 924 PFI-90 vs DMSO: Upregulated (FDR <0.05)					Mouse 924 PFI-90 vs DMSO: Downregulated (FDR <0.05)
Gene Set	NES	NOM p-val	FDR q-val		Gene Set	NES	NOM p-val	FDR q-val
KEGG_RIBOSOME	3.94074	0	0		HALLMARK_MITOTIC_SPINDLE	-2.51848	0	0
REACTOME_TRANSLATION	3.82305	0	0		WHITFIELD_CELL_CYCLE_S	-2.3321	0	0
HSIAO_HOUSEKEEPING_GENES	3.49904	0	0		PAX3FOXO1_INTERACTORS_NUCLEAR	-2.30087	0	0
HALLMARK_OXIDATIVE_PHOSPHORYLATION	3.39046	0	0		WHITFIELD_CELL_CYCLE_G1_S	-2.00673	0	0.00197382
REACTOME_RESPIRATORY_ELECTRON_TRANSPORT_ATP_SYNTHESIS	3.33686	0	0		EGLN3_INTERACTORS	-2.00163	0	0.00172434
MOOTHA_VOXPHOS	3.30375	0	0		HIF1AN_INTERACTORS_BIOGRID	-1.9644	0	0.0026494
WONG_MITOCHONDRIA_GENE_MODULE	3.20233	0	0		BRD4_JMJD6_NEGATIVELY_REGULATED	-1.94247	0	0.00298999
DEPMAP_COMMON_ESSENTIALS	2.82547	0	0		RAS_GTPASE_ACTIVATOR_ACTIVITY	-1.86061	0.00171527	0.00709147
HALLMARK_MYC_TARGETS_V1	2.59937	0	0		WANG_KDM3B_UP	-1.83563	0	0.00969117
LU_EZH2_TARGETS_UP	2.53336	0	0		BRD4_INTERACTORS_BIOGRID	-1.83024	0	0.00928936
EBAUER_MYOGENIC_TARGETS_OF_PAX3_FOXO1_FUSION	2.52403	0	0		LU_EZH2_TARGETS_DN	-1.80275	0	0.0104673
KEGG_GLYCOLYSIS_GLUCONEOGENESIS	2.4801	0	0		EIF4E_DN	-1.80113	0.00443787	0.00971734
HIF1AN_METABOLIC	2.47618	0	0		RMS_CORRELATE_WITH_FGFR4	-1.78452	0	0.0110194
HALLMARK_HYPOXIA	2.45772	0	0		PROTEIN_KINASE_ACTIVITY	-1.78264	0	0.010436
MITOCHONDRIA_PROTEOME_V1	2.37868	0	0		HALLMARK_G2M_CHECKPOINT	-1.70627	0	0.0226482
REN_ALVEOLAR_RHABDOMYOSARCOMA_DN	2.29904	0	0		MYCN_INDUCTION_6H_DOWN	-1.69832	0	0.0232868
EBAUER_TARGETS_OF_PAX3_FOXO1_FUSION_UP	2.29222	0	0		SHEN_SMARCA2_TARGETS_UP	-1.64781	0	0.0363245
HALLMARK_MYOGENESIS	2.28745	0	0		WHITFIELD_CELL_CYCLE_G2_M	-1.62349	0	0.0443665
HALLMARK_REACTIVE_OXYGEN_SPECIES_PATHWAY	2.27302	0	8.77193e-05		BILD_HRAS_ONCOGENIC_SIGNATURE	-1.62258	0	0.0422978
JIB04_24H_UP	2.26372	0	8.33333e-05		GSKJ4_24H_DOWN	-1.62	0.0117253	0.0412742
HALLMARK_GLYCOLYSIS	2.21116	0	7.93651e-05		CHROMATIN_MODIFICATION	-1.60247	0.0204082	0.0463005
REACTOME_MUSCLE_CONTRACTION	2.20168	0	7.57576e-05
NS132_SKELETAL_MUSCLE_UP	2.16593	0	0.000143449
JMJD6_INTERACTORS	2.14758	0	0.000137472
KUNINGER_IGF1_VS_PDGFB_TARGETS_UP	2.14686	0	0.000131973
GSKJ4_24H_UP	2.09238	0	0.000126897
KEGG_PROTEASOME	2.07841	0	0.000122197
REACTOME_P53_INDEPENDENT_G1_S_DNA_DAMAGE_CHECKPOINT	2.05923	0	0.000342112
DALESSIO_TSA_RESPONSE	2.05349	0	0.000387193
HALLMARK_MTORC1_SIGNALING	2.05268	0	0.000374287
MOREIRA_RESPONSE_TO_TSA_UP	1.99641	0.00508906	0.000794667
KUROKI_KDM3B_UP	1.96944	0	0.00101704
ELVIDGE_HYPOXIA_BY_DMOG_UP	1.96129	0	0.0011854
EIF4E_UP	1.94727	0	0.00134579
REACTOME_P53_DEPENDENT_G1_DNA_DAMAGE_RESPONSE	1.93384	0	0.00152666
PASINI_SUZ12_TARGETS_DN	1.92086	0	0.00156326
REACTOME_POST_TRANSLATIONAL_PROTEIN_MODIFICATION	1.8901	0	0.00222111
GO_NEGATIVE_REGULATION_OF_RELEASE_OF_CYTOCHROME_C_FROM_MITOCHONDRIA	1.86187	0.00235294	0.00287462
REACTOME_REGULATION_OF_MRNA_STABILITY_BY_PROTEINS_THAT_BIND_AU_RICH_ELEMENTS	1.85287	0	0.00305051
DELASERNA_MYOD_TARGETS_UP	1.83337	0	0.00360994
HALLMARK_EPITHELIAL_MESENCHYMAL_TRANSITION	1.83278	0	0.00352189
JMJD8_INTERACTORS	1.81737	0	0.00428508
SENESE_HDAC2_TARGETS_DN	1.81422	0	0.00426678
HALLMARK_P53_PATHWAY	1.80275	0	0.00486818
ROME_INSULIN_TARGETS_IN_MUSCLE_UP	1.78423	0	0.00536401
GO_REGULATION_OF_OXIDATIVE_STRESS_INDUCED_CELL_DEATH	1.77724	0.00245098	0.00555489
KASLER_HDAC7_TARGETS_1_DN	1.77532	0.00980392	0.0055711
PODAR_RESPONSE_TO_ADAPHOSTIN_UP	1.76202	0	0.00635111
BAE_BRCA1_TARGETS_UP	1.76179	0	0.00622149
GBM_PAUSE_CONTROLLED_GENES	1.75344	0	0.00677671
HALLMARK_APOPTOSIS	1.74237	0	0.00764619
HALLMARK_UNFOLDED_PROTEIN_RESPONSE	1.73516	0	0.00784497
PAL_PRMT5_TARGETS_DN	1.71242	0.0116009	0.00952551
GSKJ4_6H_UP	1.7099	0.00804289	0.00949311
MITOCHONDRIAL_STRESS_GENES	1.69905	0	0.0102016
NISHIBUCHI_SIN3B_DN	1.67205	0	0.0124954
MITOCHONDRIA_PROTEOME_V2	1.66969	0.00729927	0.0125519
TORCHIA_TARGETS_OF_EWSR1_FLI1_FUSION_TOP20_DN	1.66177	0.0157895	0.0132684
KESHELAVA_MULTIPLE_DRUG_RESISTANCE	1.64065	0.00593472	0.0159167
RORIE_TARGETS_OF_EWSR1_FLI1_FUSION_DN	1.59985	0.0217391	0.0221498
NAGASHIMA_EGF_SIGNALING_UP	1.58788	0.0136986	0.0241436
KAYO_AGING_MUSCLE_DN	1.57883	0	0.0253864
HALLMARK_DNA_REPAIR	1.57404	0	0.0257663
KIM_RESPONSE_TO_TSA_AND_DECITABINE_UP	1.56171	0	0.0285925
CONCANNON_APOPTOSIS_BY_EPOXOMICIN_DN	1.5594	0	0.0286813
REACTOME_SMOOTH_MUSCLE_CONTRACTION	1.55781	0.0365854	0.0286418
HENDRICKS_SMARCA4_TARGETS_UP	1.5544	0.0191781	0.029181
HALLMARK_PI3K_AKT_MTOR_SIGNALING	1.53364	0	0.0337345
HALLMARK_TNFA_SIGNALING_VIA_NFKB	1.52525	0	0.035461
GO_REGULATION_OF_RESPONSE_TO_REACTIVE_OXYGEN_SPECIES	1.5231	0.0468384	0.0352745
MARKS_HDAC_TARGETS_UP	1.52169	0.0390805	0.0350245
INGA_TP53_TARGETS	1.49083	0.0582751	0.0425155
TRICHE_PAX3FOXO1A_TUMOR_DOWN	1.47984	0	0.045386
HELLER_SILENCED_BY_METHYLATION_DN	1.47938	0.0152439	0.044905
MARTINEZ_TP53_TARGETS_UP	1.47832	0	0.044687
