# Supplementary material for: KDM3B inhibitors disrupt PAX3-FOXO1 oncogenic activity in fusion positive rhabdomyosarcoma.
Source: Research Square preprint supplement (doi:10.21203/rs.3.rs-2298627/v1), 2022-11-29
Supplement: Supplementary file 3 [file 2667b8ceb2b860c73dee3d6d.docx]

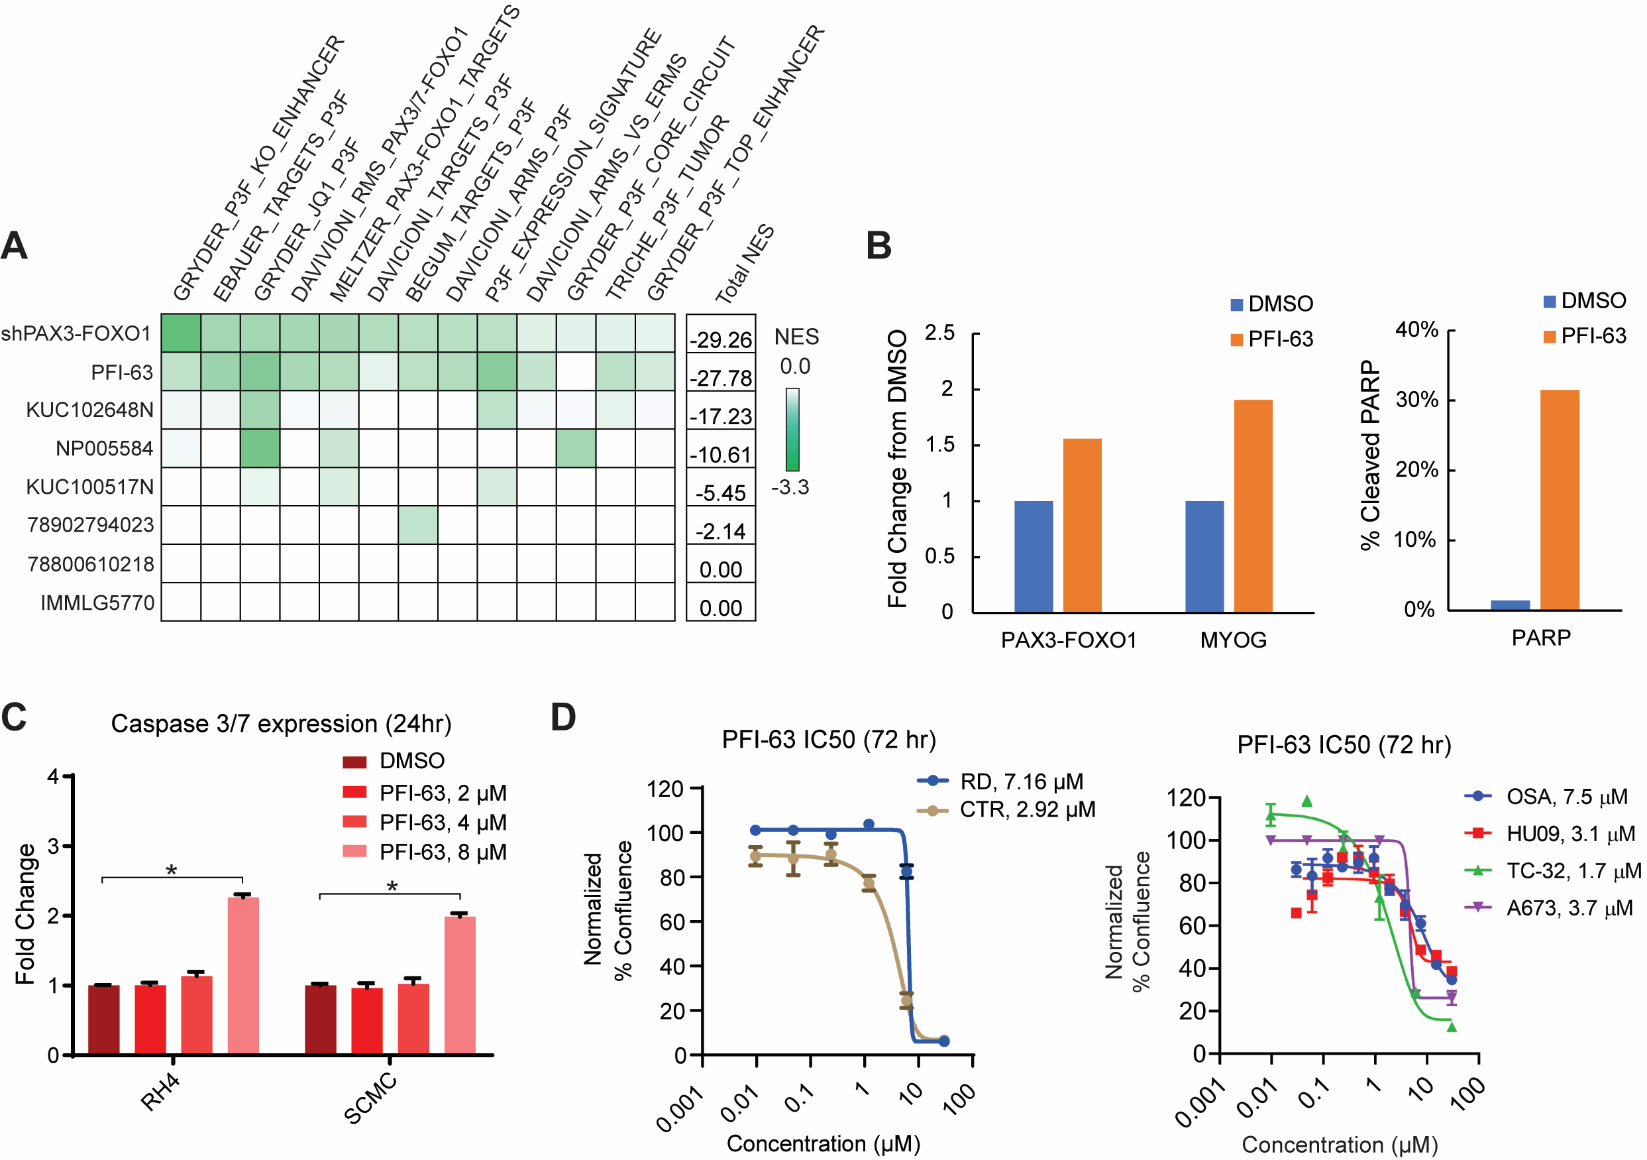


**Supplementary Figure 1.** **A,** RNA-seq GSEA analysis of top 7 uncharacterized novel compounds looking at PAX3-FOXO1 gene sets. **B,** Quantitation of Western bands normalized to loading control and fold change based on DMSO. **C,** Caspase 3/7 quantitation when treated with PFI-63 using luminescence based assay Caspase-Glo. RH4 * p=1.02 x10-6, SCMC * p=8.48x10-6 **D,** IC50 of growth inhibition using PFI-63 of fusion negative RMS and other children’s cancer cell lines.


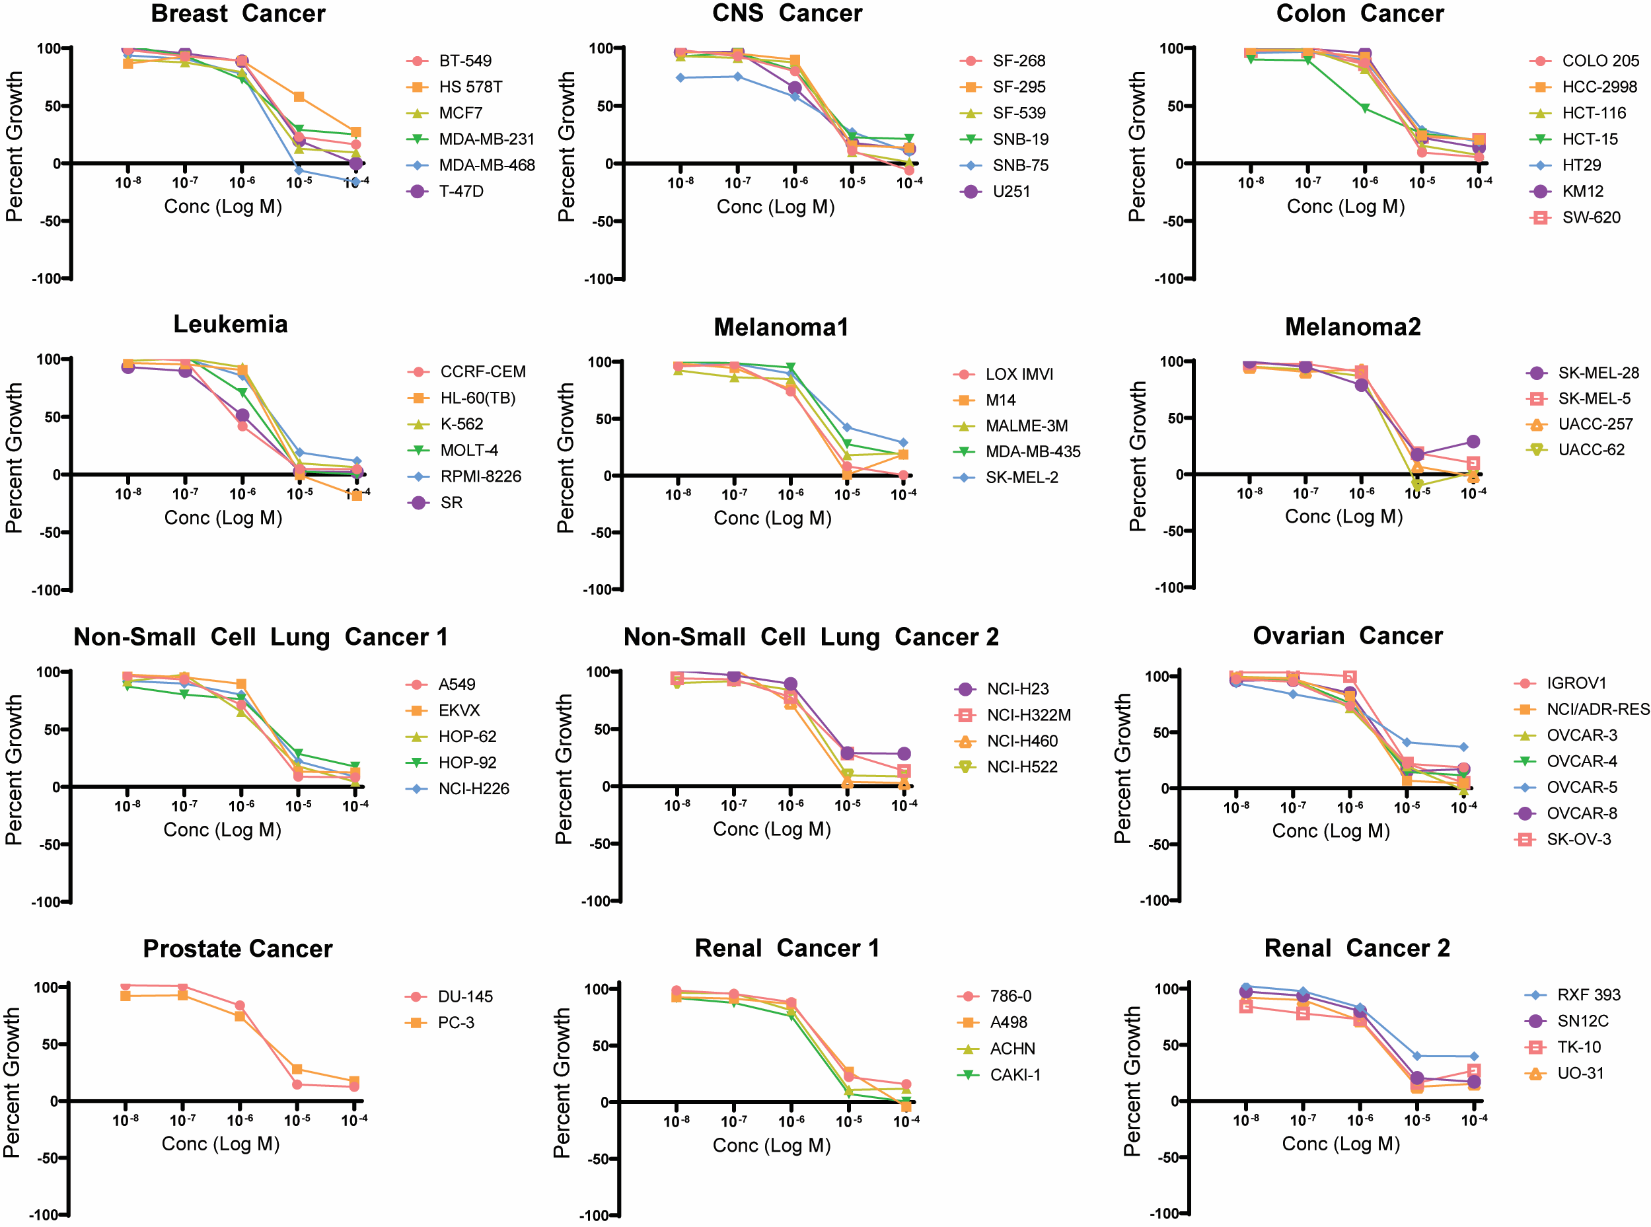


**Supplementary Figure 2.** Growth inhibition as percent of control in 60 cancer cell lines by PFI-63.


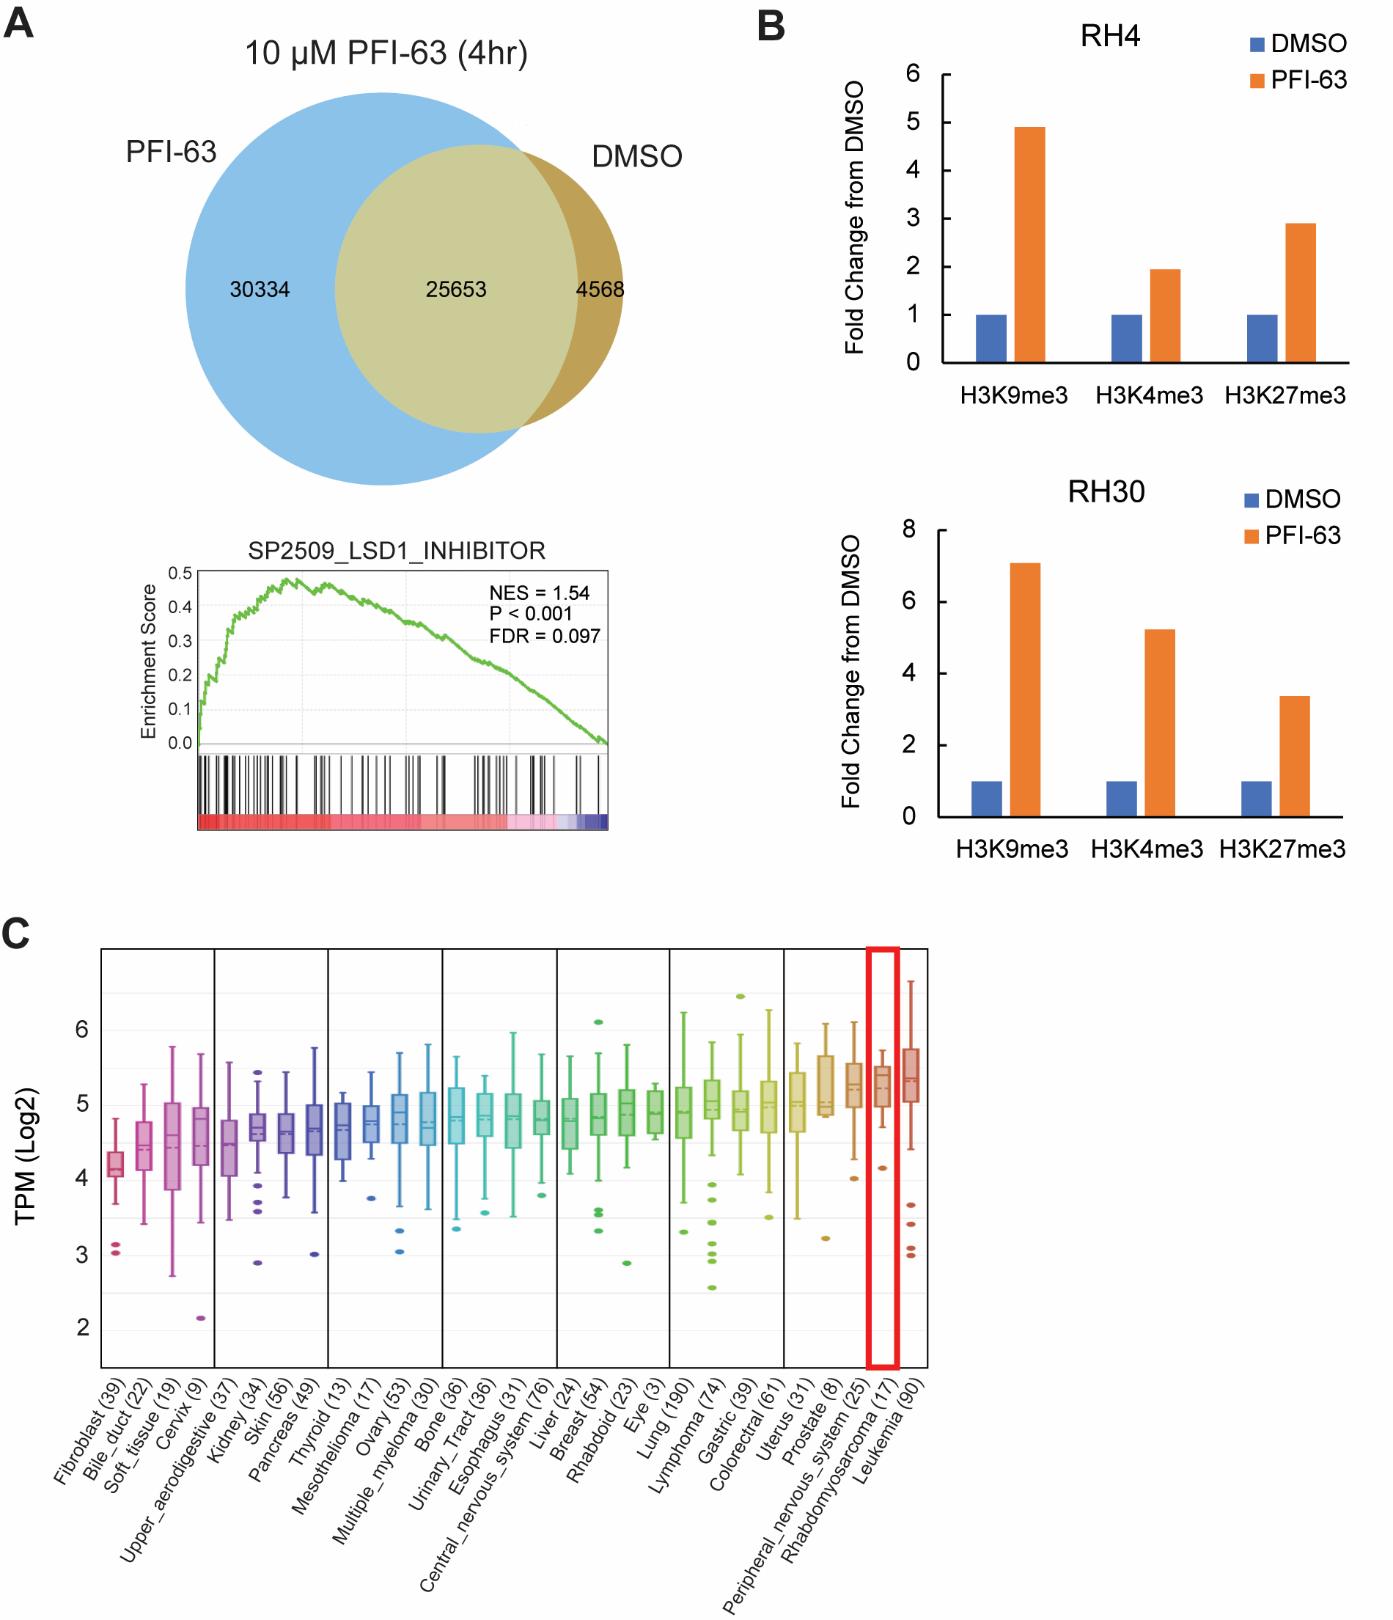


**Supplementary Figure 3. A,** ATAC-seq analysis after treatment with PFI-63 vs DMSO for 4 hours. Venn diagram of ATAC-seq and GSEA analysis of PFI-63 only genes. **B,** Quantitation of Western for histone marks. **C,** BROAD DepMap expression level of KDM3B in various cancer lines. Solid line is median and dotted line is mean with order according to mean.


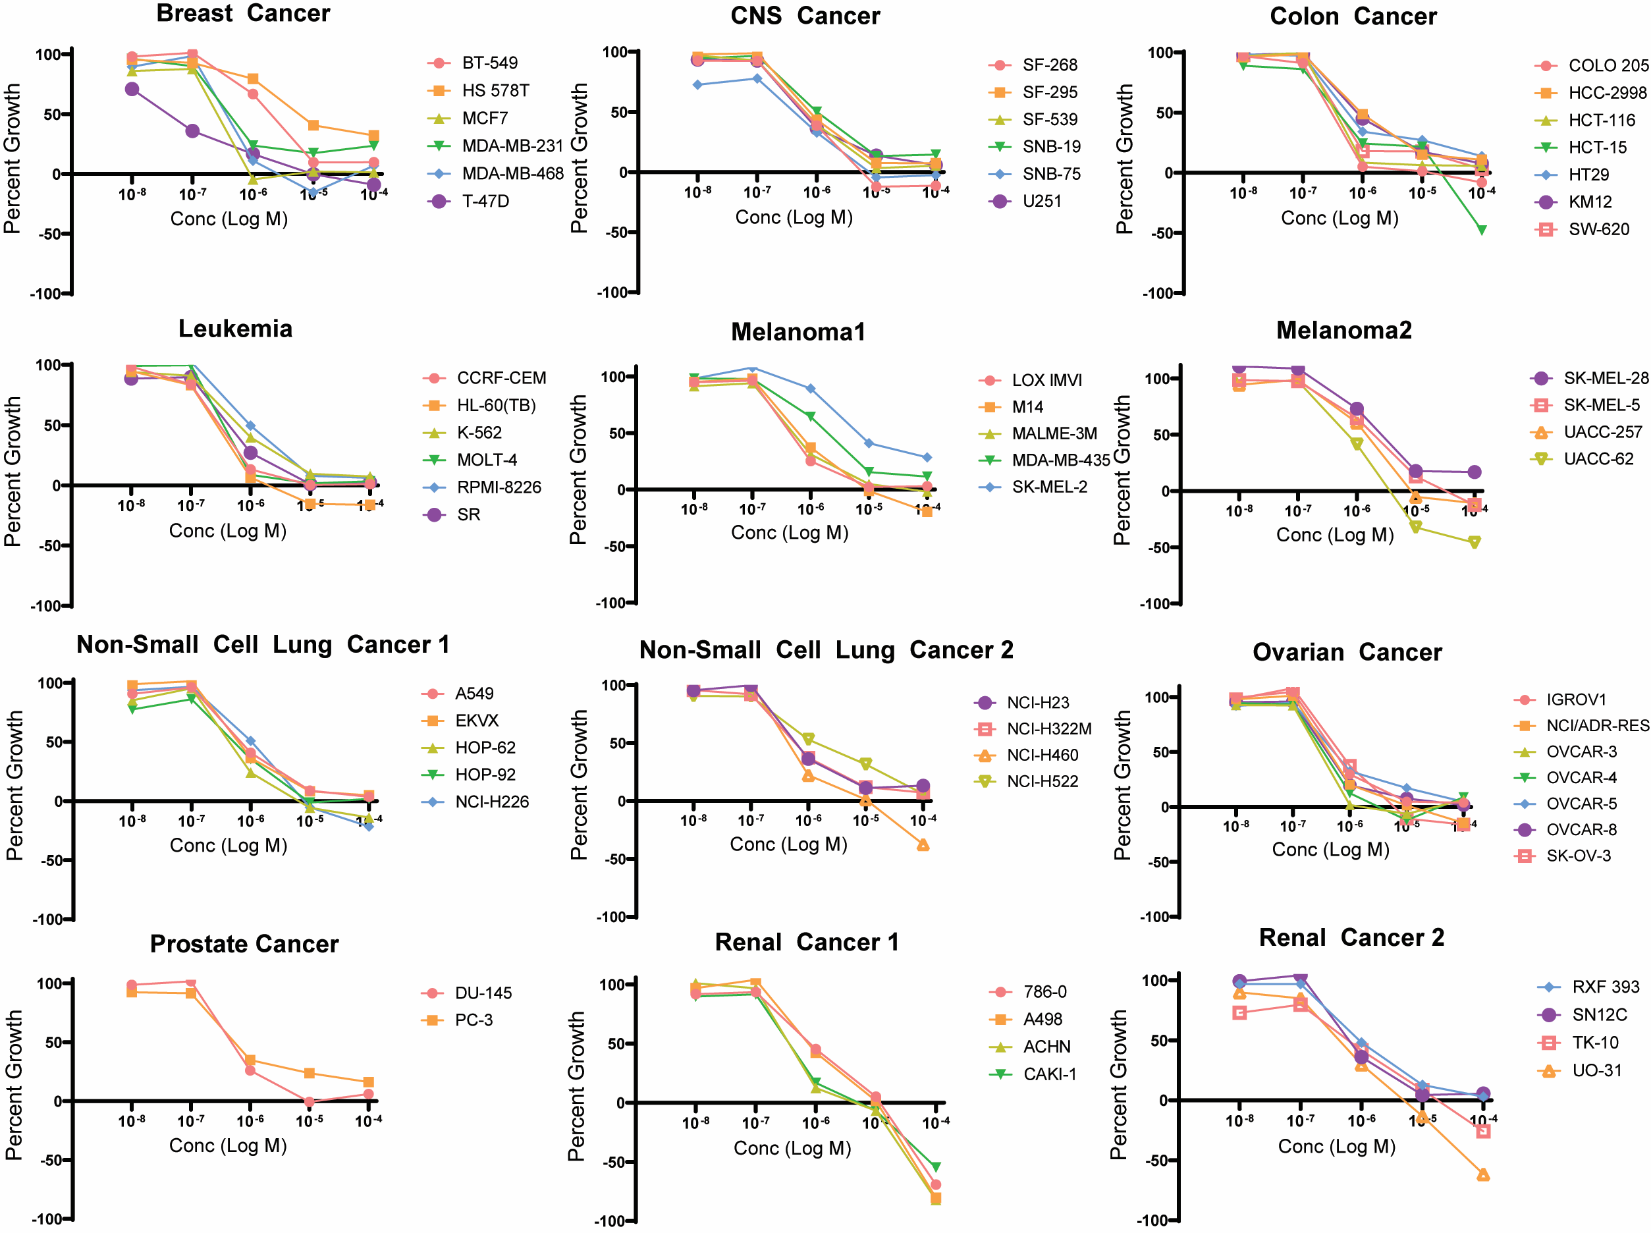


**Supplementary Figure 4.** Growth inhibition as percent of control in 60 cancer cell lines by PFI-90.


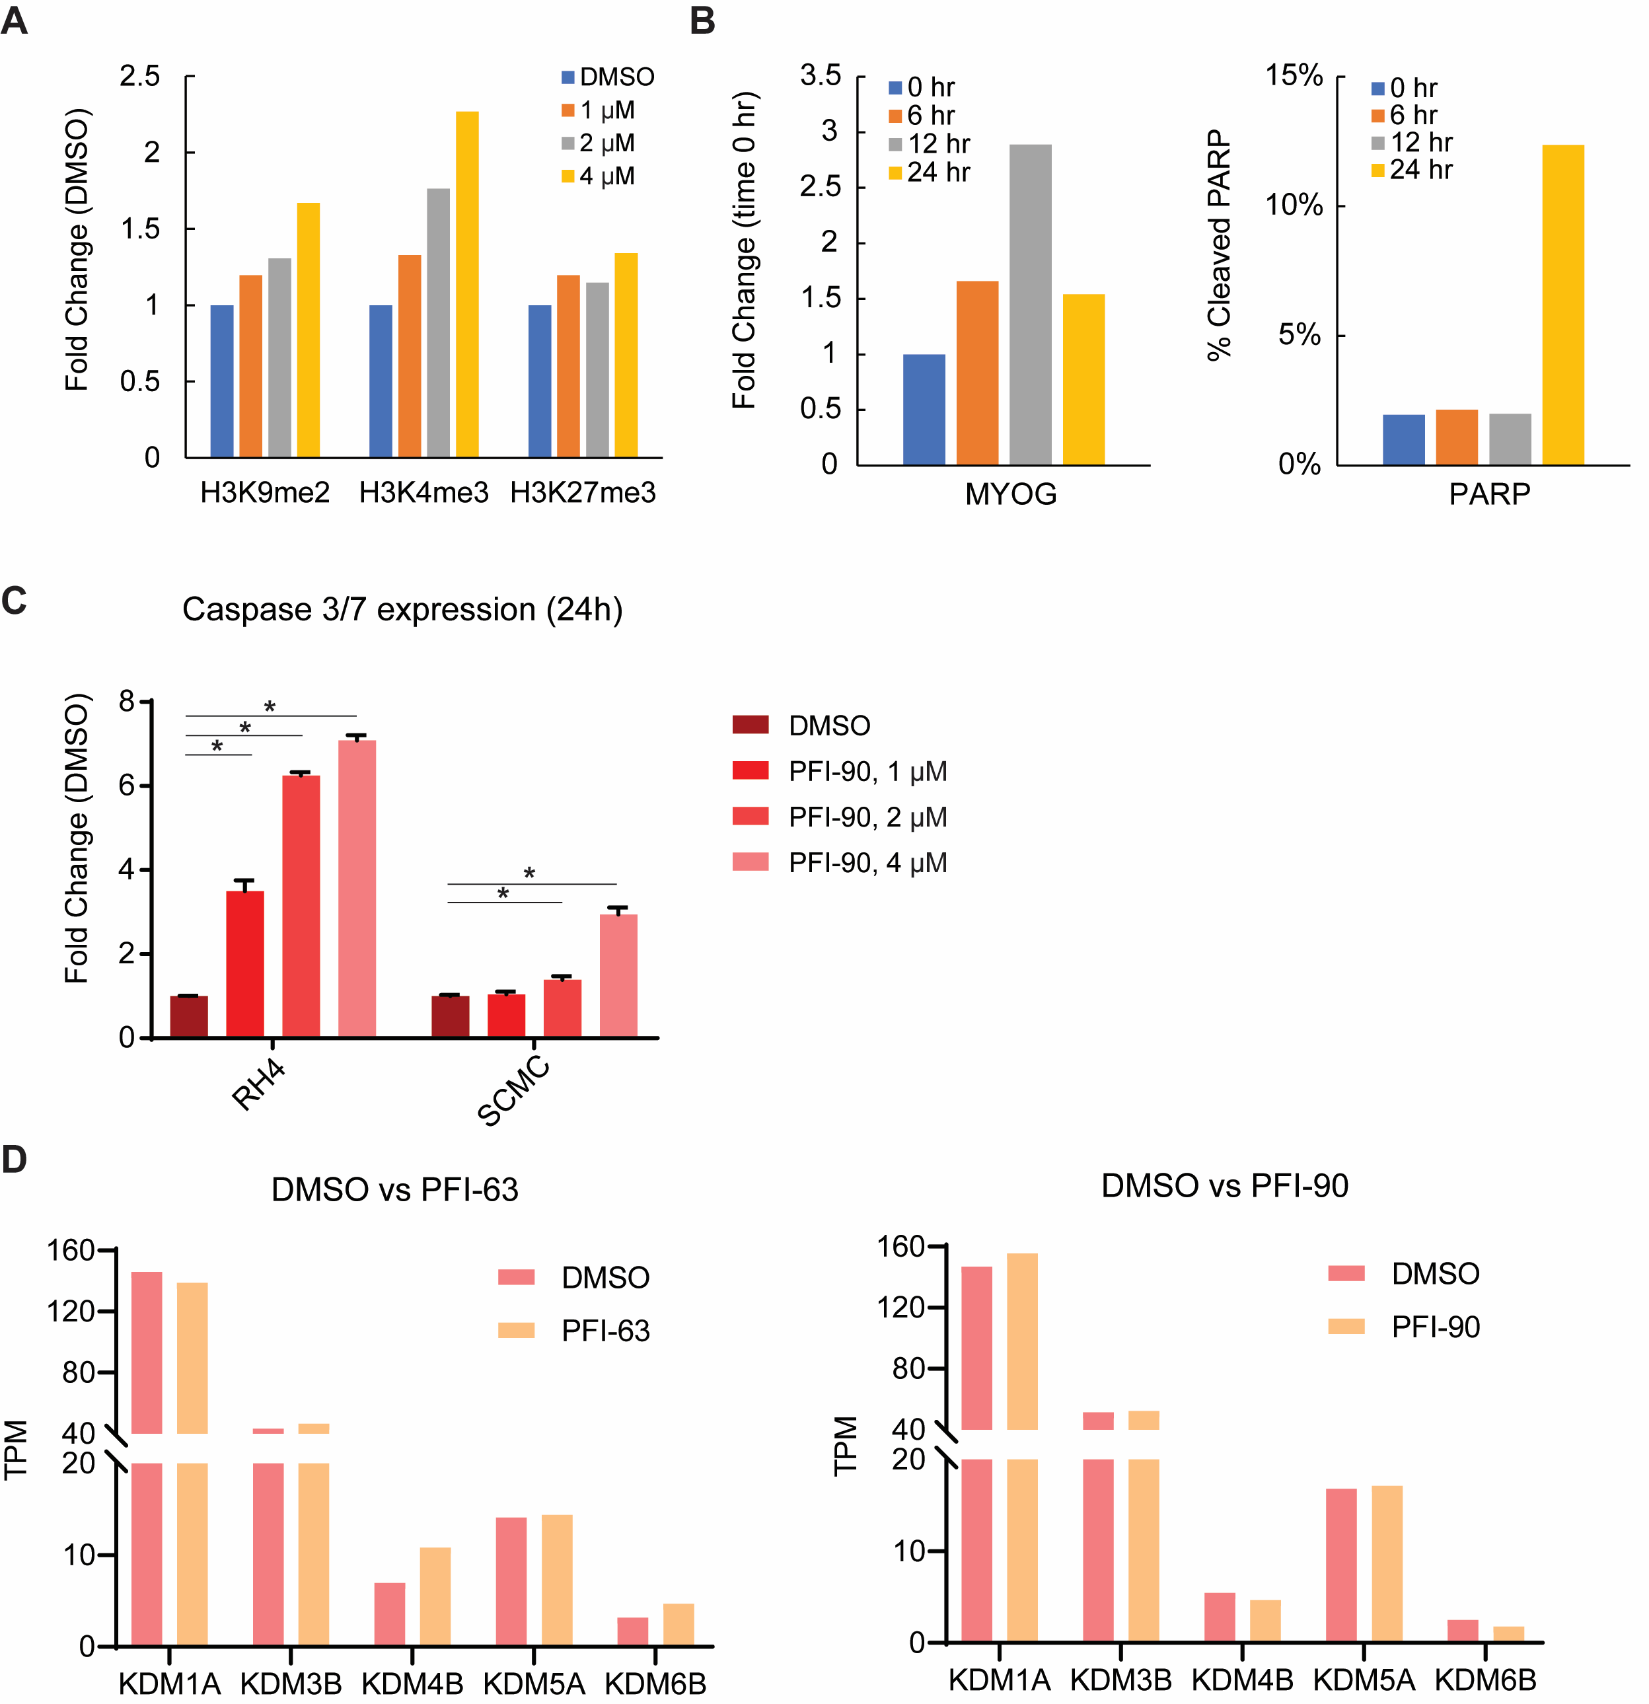


**Supplementary Figure 5. A,** Western blot quantitation of histone marks in RH4 cell line with DMSO control and various doses of PFI-90. **B,** Western blot quantitation of MYOG and PARP cleavage as time course with PFI-90 treatment at 1 µM. Fold change from time 0 to 6 hr, 12 hr, and 24 hr in RH4 cell line. **C,** Quantitation of caspase 3/7 using Caspase-Glo luminescence as read out. RH4 1 µM p=7.7x10-5, 2 µM p=3.4x10-8, 4 µM p=1.3x10-7. SCMC 2 µM p=0.002, 4 µM p=3.6x10-5. **D,** RNA-seq transcript levels in TPM of KDMs in RH4 cell line after treatment with PFI-63 (10µM) and PFI-90 (1µM) vs DMSO. 6 hour time for PFI-63 and 24 hour time point for PFI-90.


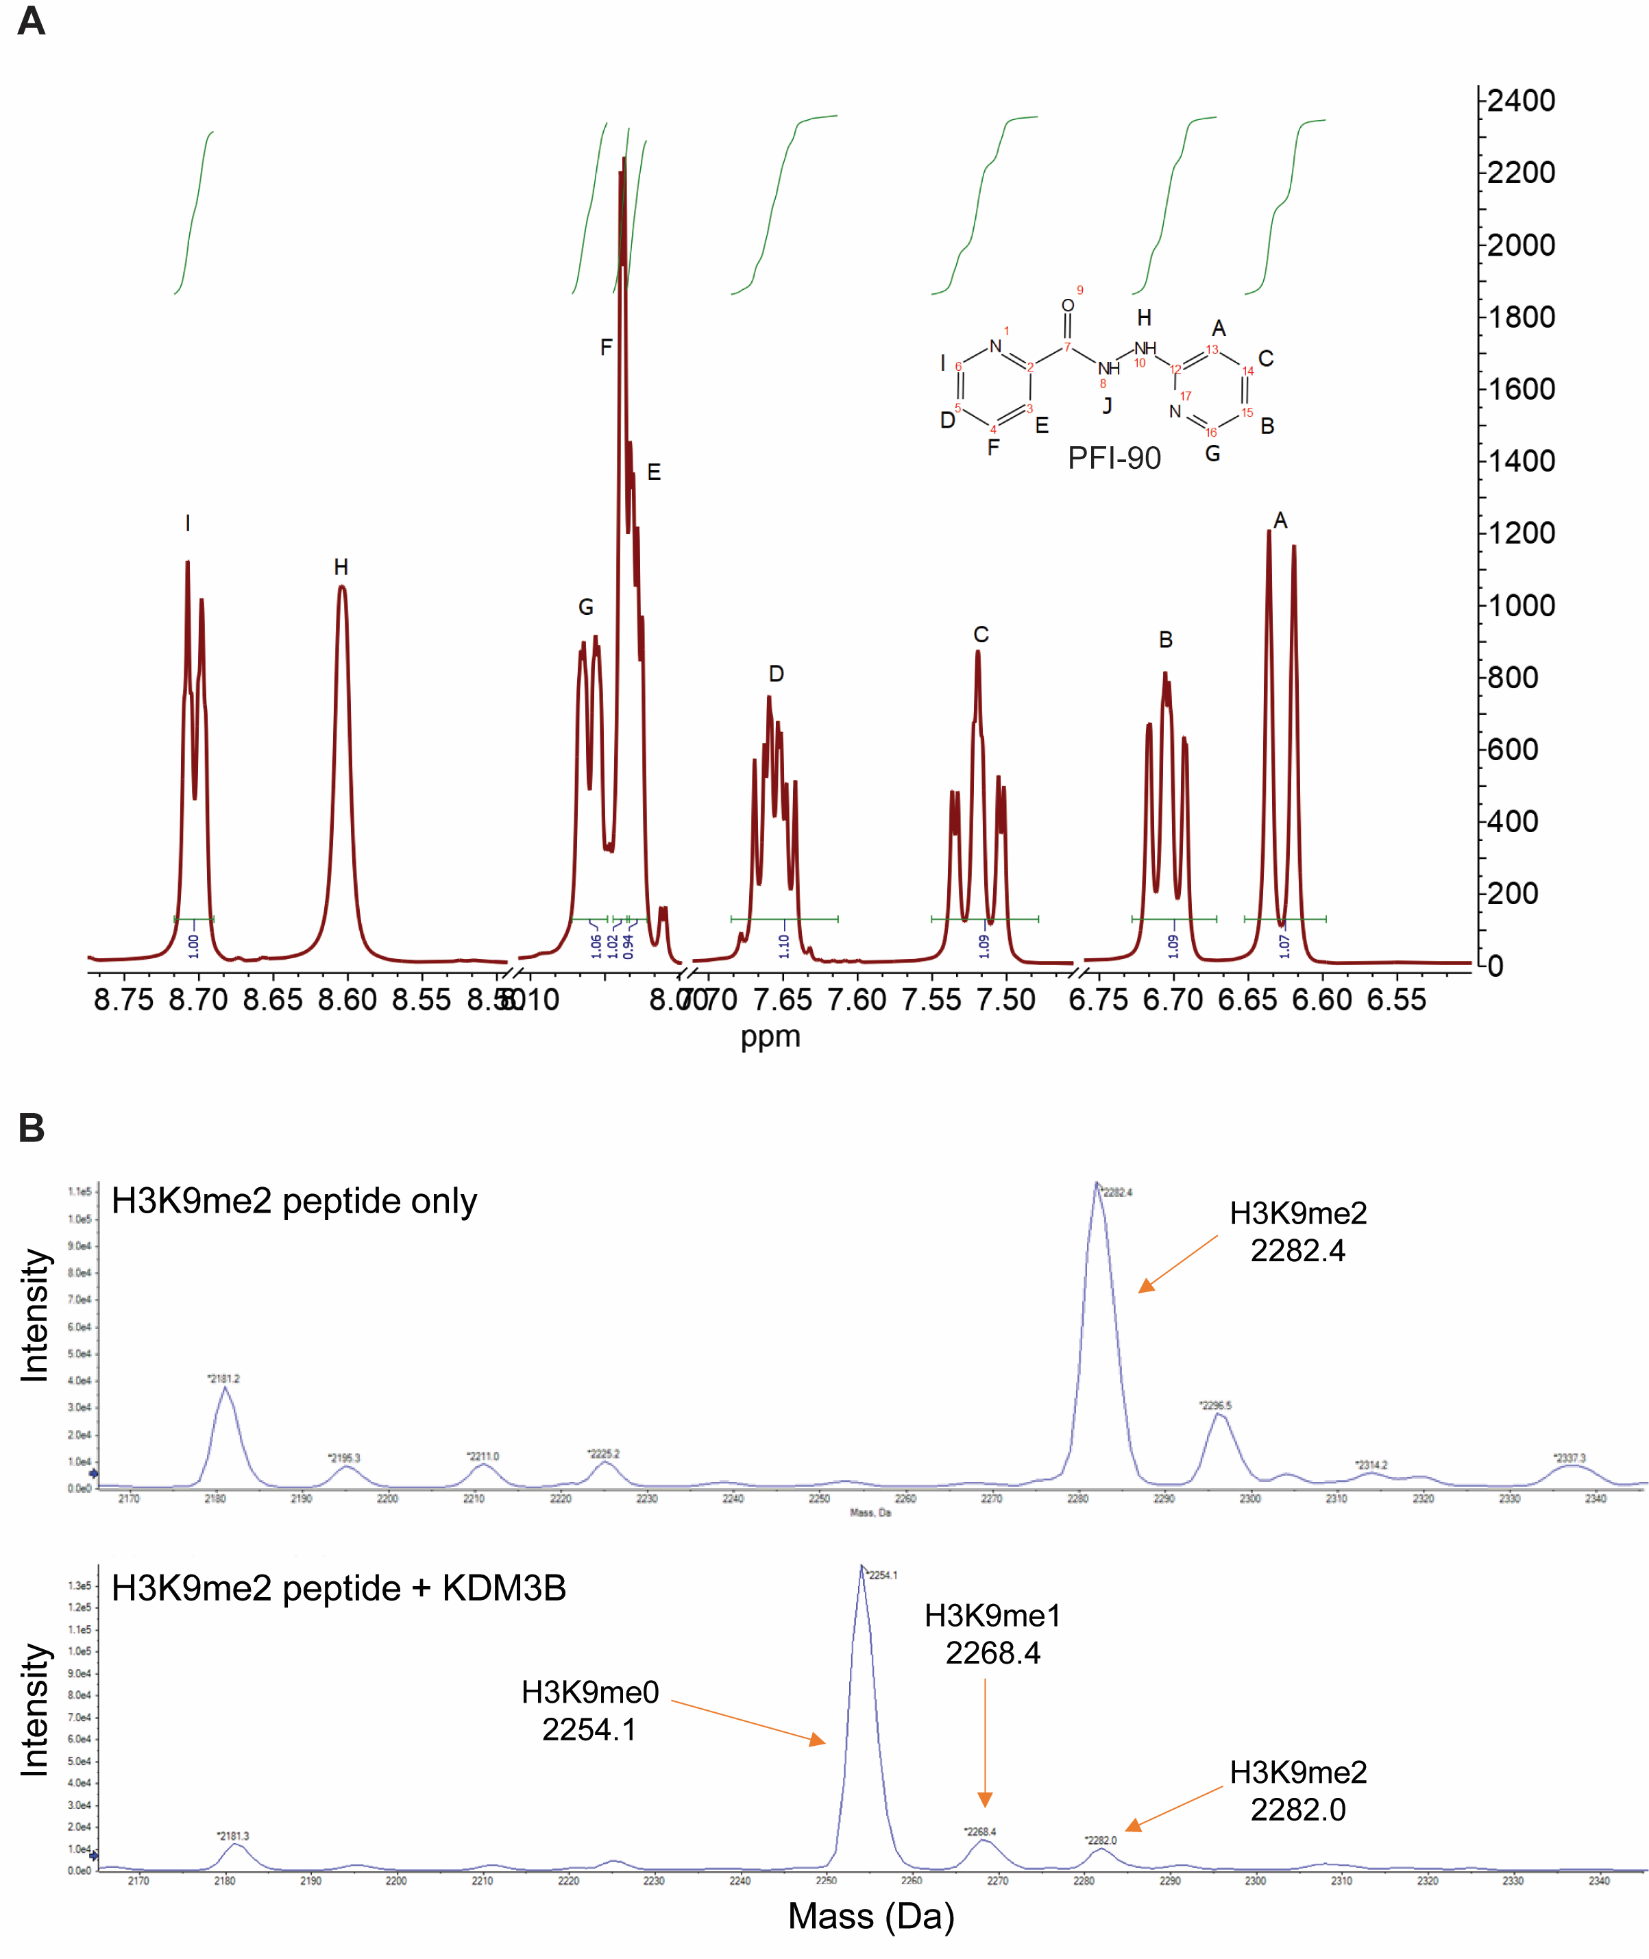


**Supplementary Figure 6. A,** H1NMR of PFI-90 to assign H peaks to specific locations of PFI-90. **B,** Testing enzymatic function of full length KDM3B in demethylating H3K9me2. Reconstructed mass spectrum showing methyl group removal after incubation with KDM3B for 3 hours at room temperature.


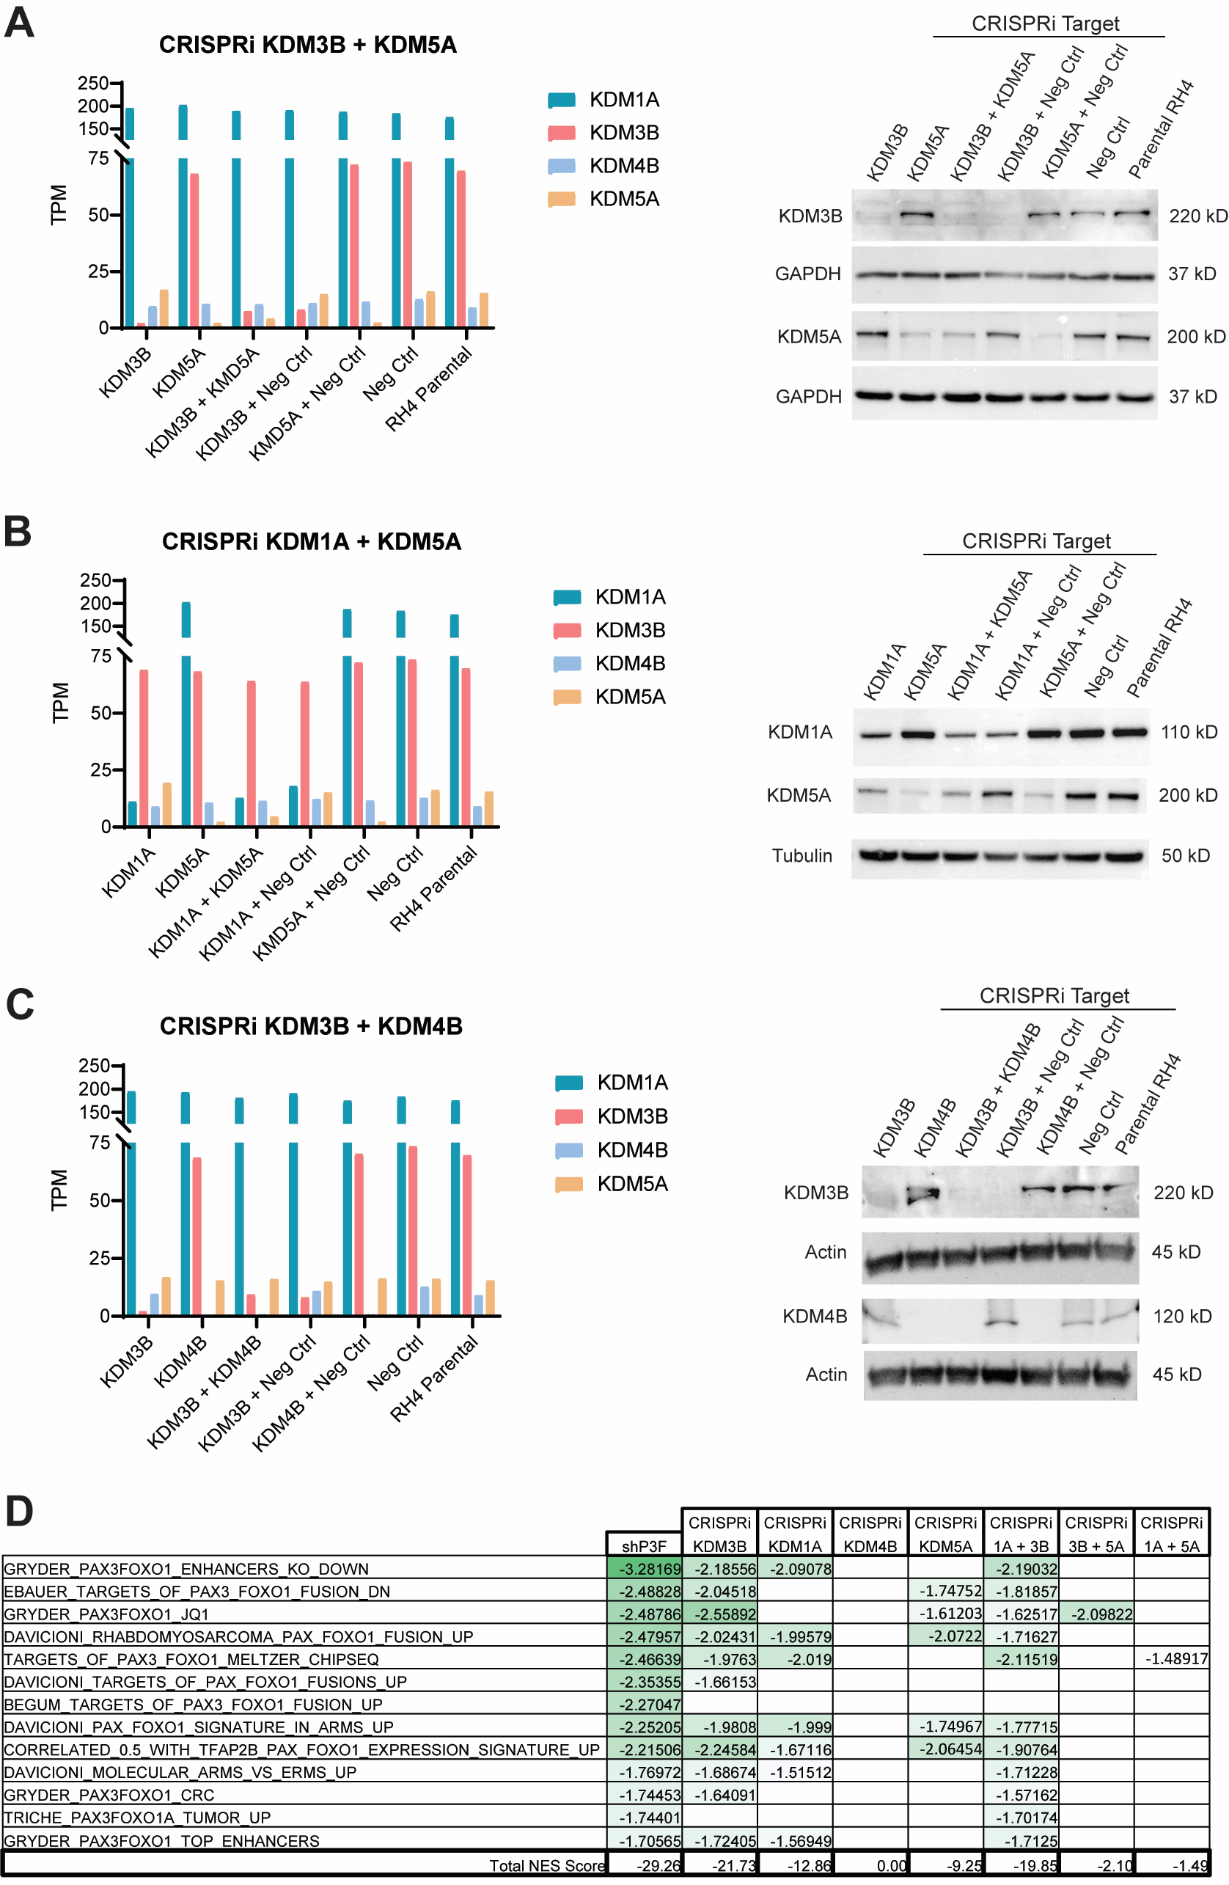


**Supplementary Figure 7.** CRISPRi knockdown of KDMs. **A,** Transcript in TPM (left) and western blot validation (right) of CRISPRi targeting KDM3B and KDM5A. **B,** Transcript in TPM and western blot validation of CRISPRi targeting KDM1A and KDM5A. **C,** Transcript in TPM and western blot validation of CRISPRi targeting KDM3B and KDM4B. **D,** RNA-seq GSEA of PAX3-FOXO1 signatures for CRISPRi knockdown of KDMs compared to shP3F knockdown.


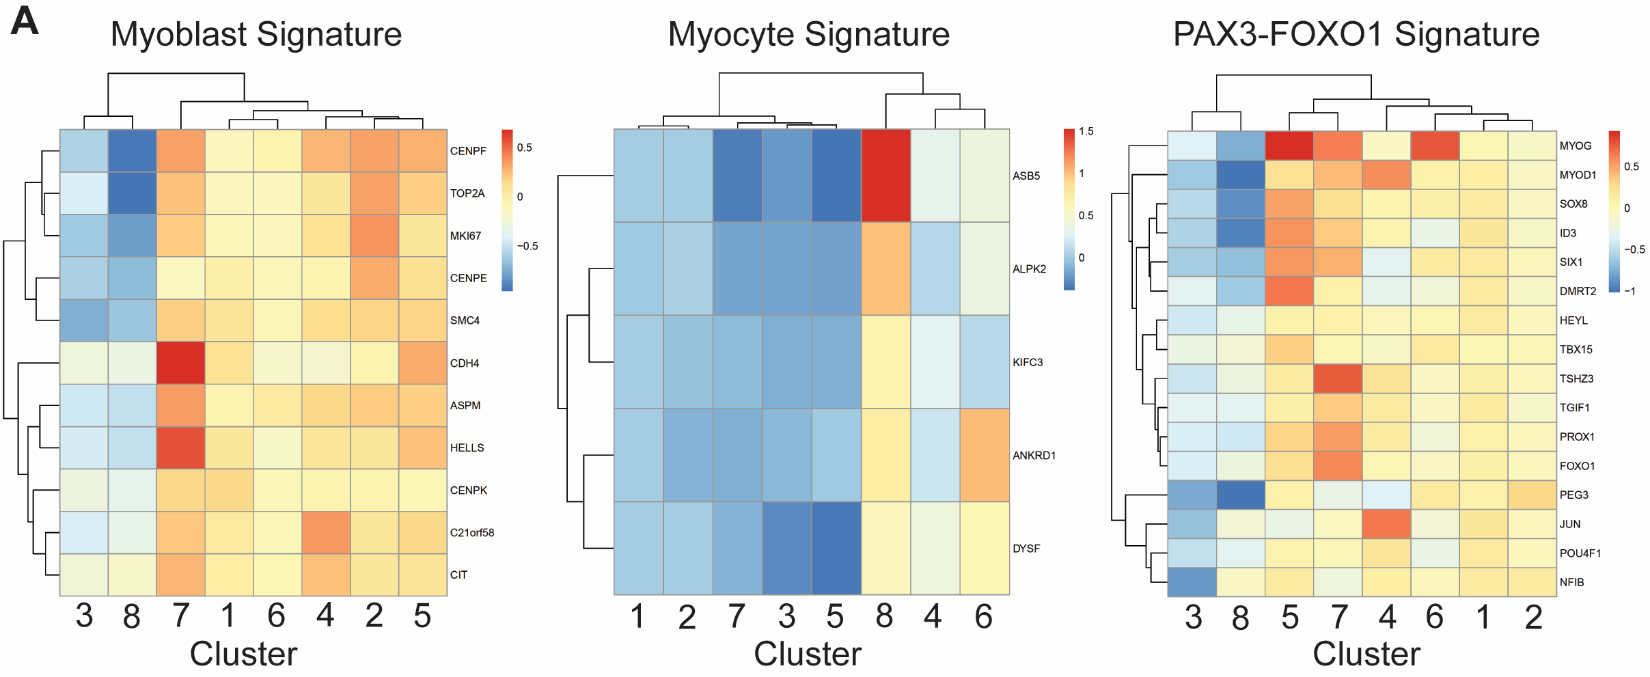


**Supplementary Figure 8. A,** Heatmap of scRNA-seq clusters based on leading edge genes from myoblast, myocyte, PAX3-FOXO1 signatures.

**
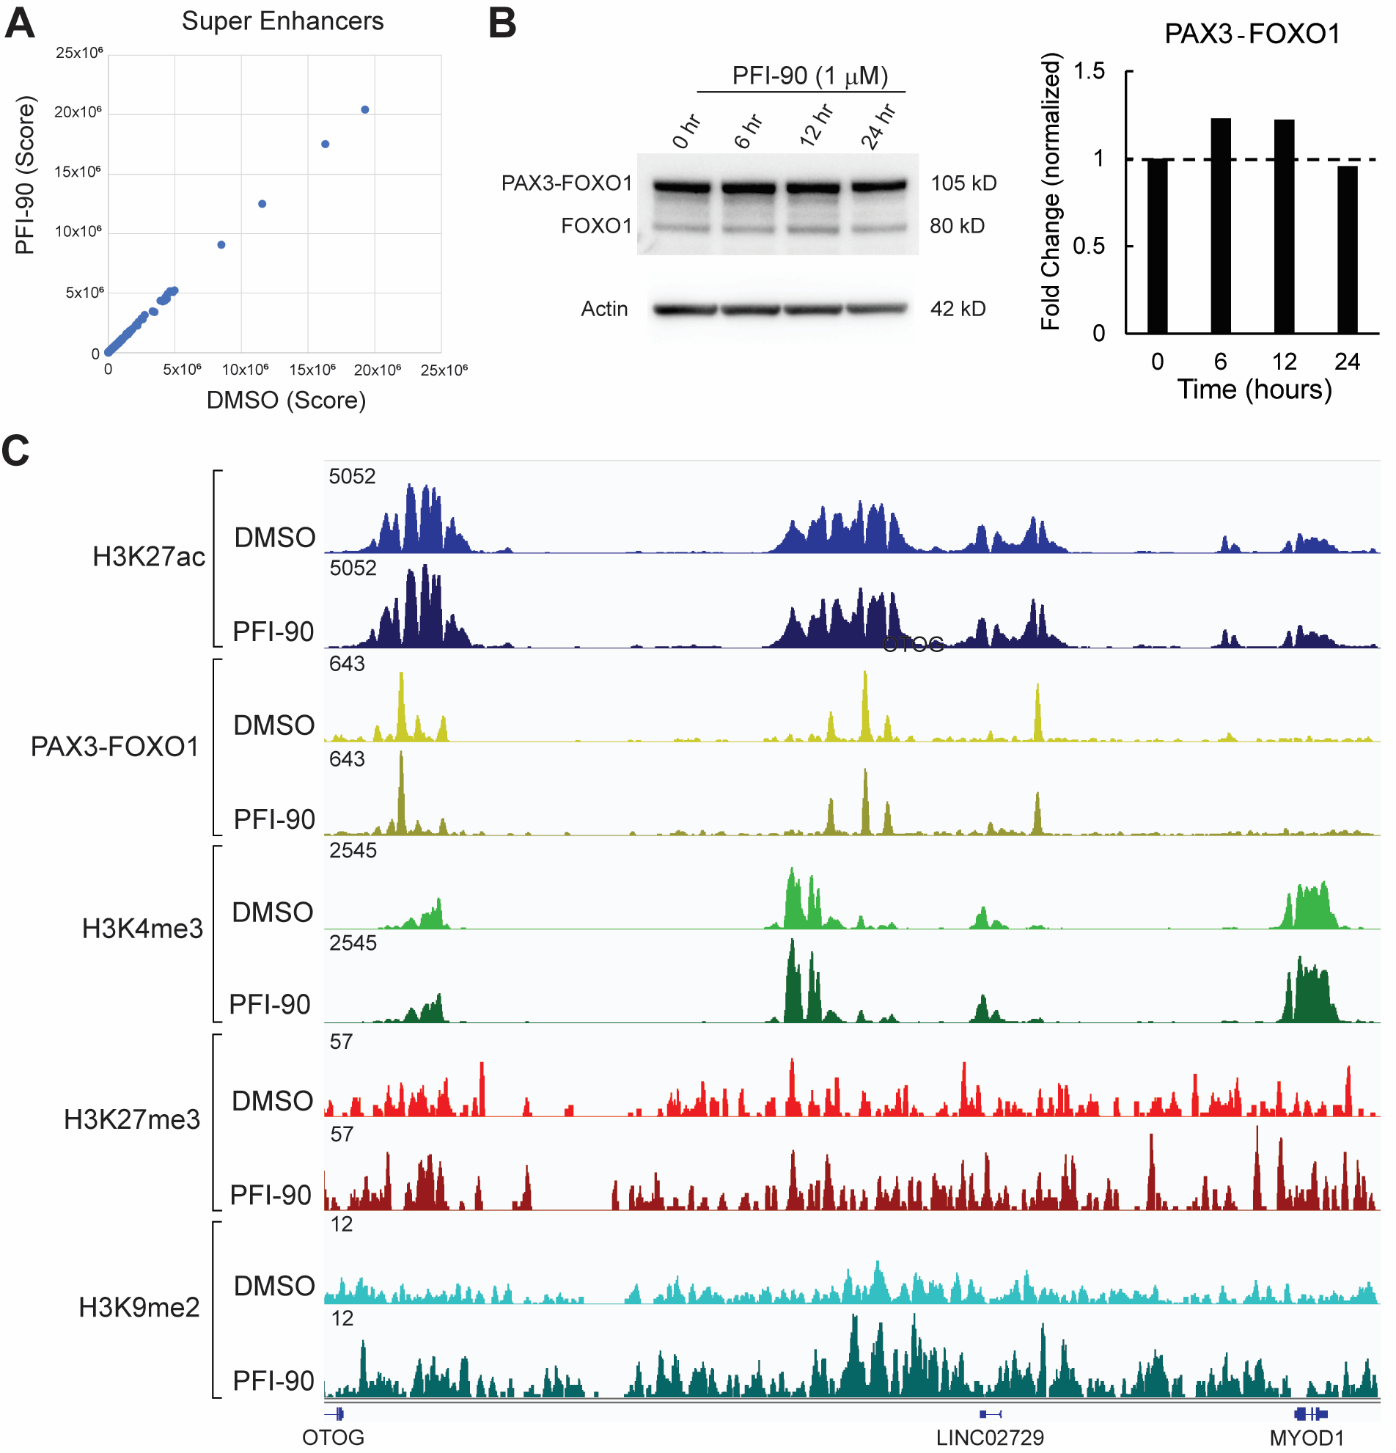
**

**Supplementary Figure 9. A,** Plot of all super enhancers using H3K27ac ChIP-seq results by ROSE analysis with each super enhancer plotted by score from PFI-90 (1µM) vs DMSO at the 24 hr time point. **B,** PAX3-FOXO1 western blot and quantitation normalized to actin loading control and time 0 in RH4 cell line at various time points after treatment with PFI-90 1µM. **C,** IGV view of histone marks and PAX3-FOXO1 24 hours after treatment with PFI-90 (1µM) vs DMSO.


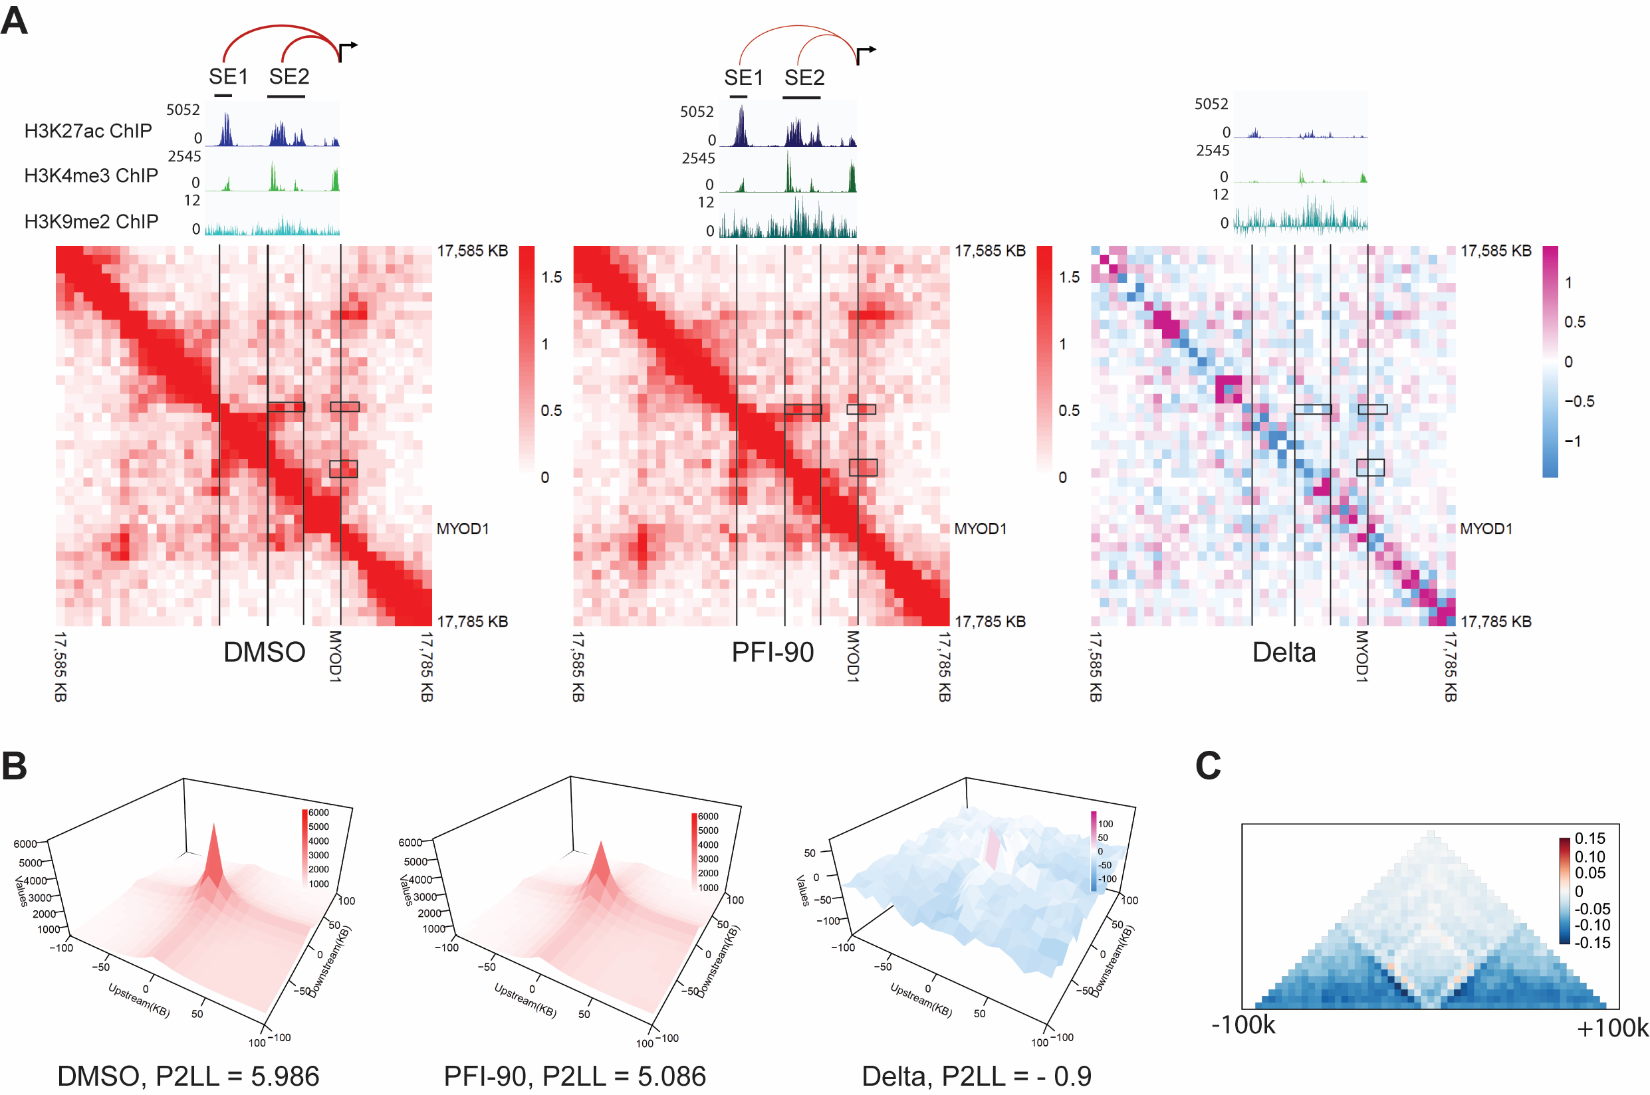


**Supplementary Figure 10.** HiC analysis of RH4 cells treated for 24 hr with PFI-90 (1µM) vs DMSO. **A,** MYOD1 loop analysis with ChIP-seq track of H3K27ac, H3K4me3, and H3K9me2. **B,** Genome wide loop analysis. **C,** Genome wide TAD score.

**
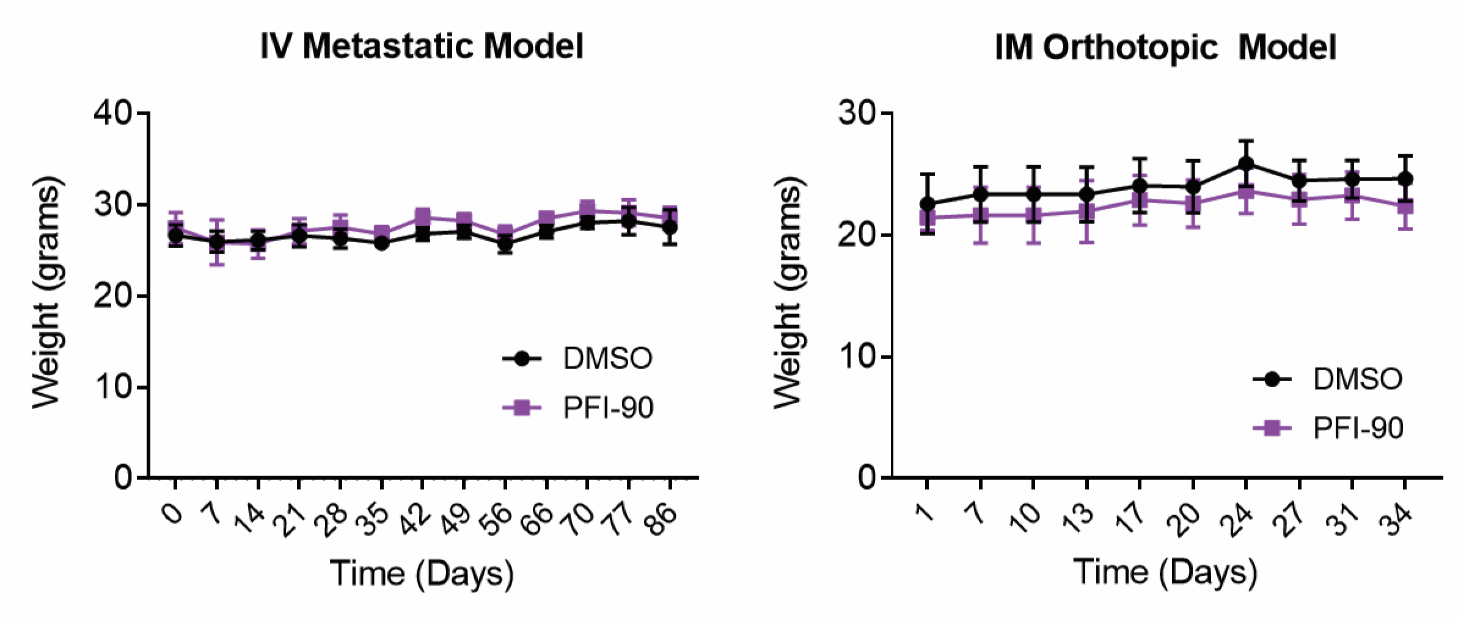
**

**Supplementary Figure 11.** Weight measurement during treatment of mice with DMSO vs PFI-90 in IV metastatic model and IM orthotopic model.
