# Supplementary material for: KDM3B inhibitors disrupt PAX3-FOXO1 oncogenic activity in fusion positive rhabdomyosarcoma.
Source: Research Square preprint supplement (doi:10.21203/rs.3.rs-2298627/v1), 2022-11-29
Supplement: Supplementary file 4 [file 33590fe32872499f5ba05f86.xlsx]

## Sheet: Tab1. 64 Compounds
Supplementary Table S1, Tab1. Drug Screen Result of Secondary Screen Resulting in 64 Compounds
RNA-seq	ID	Name	Target/Activity	Structure	Dose Response
Known Compounds
	30205	30205	PPK2
	65537	Benzenesulfonamide, 3-​[2-​(4-​amino-​3-​methoxy-​1-​naphthalenyl)​diazenyl]​-	CA2 inhibitor
	838_2725_0263_9024	N-[3-[(2-thiophen-3-yl-1H-pyrrolo[3,2-c]pyridin-4-yl)amino]phenyl]acetamide	AKT
	DT-005	Acetoxy-beta-pyrone	Transcription inhibitor
	N001302	1-Alaninechlamydocin	HDAC
	308847	Amonafide	TOP2
	A 9809	Amsacrine hydrochloride	TOP2
	B-168	Butaclamol hydrochloride	Dopamine antagonist
	E971-0507	(N-(1,3-benzodioxol-5-yl)-2-spiro[1H-quinazoline-2,1'-cyclohexane]-4-ylsulfanylacetamide)	AHR activator
	99C072A	Bisaprasin	HDAC/DNMT
	639174	9-Glycineamido-20(S)-camptothecin	TOP1
	308849	1H-Benz[de]isoquinoline-1,3(2H)-dione, 5-amino-2-[2-(1-pyrrolidinyl)ethyl]-	AHR activator
	KUC102774N	KUC102774N	TDP1
	269148	Menogaril	TOP2
	EI-146	Methyl 2,5-dihydroxycinnamate	TDP1
	PZ0111	PD-407824	CHEK1/WEE1
	EI-370	PKC-412 (Midostaurin)	Multi-kinase
	99C010A	Psammaplin A	Class I HDAC/TOP2
	EI-155	Sphingosine	PKC/HDAC
	T0512-7559	MLS001172048	G9a/EHMT2
	122819	Teniposide	TOP2
	333856	Tetrocarcin A sodium salt	BCL2
	V 1377	Vinblastine sulfate salt	Tubulin
	67574	Vincristine sulfate	Tubulin
	V 8879	Vincristine sulfate	Tubulin
Novel Compounds
	640541	640541	No Known Target
	130D151E02	130D151E02	No Known Target
	130D151F05	130D151F05	No Known Target
	1492-0593	1492-0593	No Known Target
	712_2136_2360	712_2136_2360	No Known Target
	712_2312_7204	712_2312_7204	No Known Target
	712_2314_2336	712_2314_2336	No Known Target
	729_2624_0026_0263	729_2624_0026_0263	No Known Target
	729_7833_4347_0263	729_7833_4347_0263	No Known Target
X	788_0061_0218	788_0061_0218	No Known Target
X	789_0279_4023	789_0279_4023	No Known Target
	809_2669_5837_8095	809_2669_5837_8095	No Known Target
	838_2725_0263_0021	838_2725_0263_0021	No Known Target
	838_2729_0263_0021	838_2729_0263_0021	No Known Target
	838_2729_0263_0106	838_2729_0263_0106	No Known Target
	882_0053_6313	882_0053_6313	No Known Target
	924_2760_0164	924_2760_0164	No Known Target
	341956	1H-Indole-2-carboxylic acid, 5,6-bis(acetyloxy)-2,3-dihydro-2-methyl-, methyl ester	No Known Target
	D666-0087	2H-​Benzimidazol-​2-​one, 1,​3-​dihydro-​5-​[[4-​[[[2-​(1H-​indol-​3-​yl)​ethyl]​amino]​methyl]​-​2-​methoxyphenoxy]​methyl]​-​1,​3-​dimethyl-​, hydrochloride (1:1)	No Known Target
	CMLD009040	CMLD009040	No Known Target
	CCPMLSC05AYAN-IV-113	1H-​Cyclopenta[c]​quinoline-​4-​carboxylic acid, 2,​3,​3a,​4,​5,​9b-​hexahydro-​1,​2-​dihydroxy-​, ethyl ester	No Known Target
	FD-1174	FD-1174	No Known Target
	I-2	2H-​Indol-​2-​one, 3-​[3-​[(3-​bromopropoxy)​imino]​-​1,​3-​dihydro-​2H-​indol-​2-​ylidene]​-​1,​3-​dihydro-	No Known Target
X	IMMLG-5770	3(2H)​-​Quinazolineheptanami​de, 7-​[[[[2-​(2-​chlorophenyl)​ethyl]​amino]​ carbonyl]​amino]​-​1,​4-​dihydro-​N-​hydroxy-​6-​methoxy-​2,​4-​dioxo-	No Known Target
	IMMLG-6075	IMMLG-6075	No Known Target
	IMMLG-6783	IMMLG-6783	No Known Target
	IMMLG-6796	IMMLG-6796	No Known Target
X	KUC100517N	4-[3-(3-Acetylthiophen-2-yl)phenyl]-5,7-dimethoxychromen-2-one	No Known Target
X	KUC102648N	Acetic acid 4-[2-[3-(3,4,5-trimethoxyphenyl)-5-methylisoxazole-4-yl]vinyl]phenyl ester	No Known Target
	UPCMLD0ENAT5685040	Methyl 4-[3-(4-methoxyphenyl)-3-oxoprop-1-enyl]benzoate	No Known Target
	N001602	N001602	No Known Target
X	NP-005584	NP-005584	No Known Target
	NP-007582	NP-007582	No Known Target
	STK639473	N-[2-(dimethylamino)ethyl]-6,7-dimethoxy-1-phenyl-1,4-dihydroindeno[1,2-c]pyrazole-3-carboxamide	No Known Target
	T5888474	5-Methyl-7-(2,4,5-trichlorophenoxy)-[1,2,4]triazolo[1,5-a]pyrimidine	No Known Target
	T6561982	T6561982	No Known Target
	Z250-2613	N-[2-(dimethylamino)ethyl]-1-[7-(3-methylphenyl)-4-oxo-3,4-dihydrothieno[3,2-d]pyrimidin-2-yl]piperidine-4-carboxamide	No Known Target
X	UPCMLD0ENAT5834780 (PFI-63)	N'-(3,5-dimethylbenzoyl)pyridine-2-carbohydrazide = PFI-63	No Known Target
	UPCMLD00CSF74-1-1	Methyl 4-benzoyl-9-[(3-chlorophenyl)methyl]-3,7- dimethyl-10-propyl-4,9-diazatricyclo[6.3.0.02,6]undeca-1(8),10-diene-3-carboxylate	No Known Target

## Sheet: Tab2. SEA In Silico Screen
Supplementary Table S1, Tab2. Similarity Ensemble Approach (SEA) Screen Result of PFI-63
SEA In Silico Screen of PFI-63
Query Smiles	Target ID	Affinity Threshold (nM)	P-Value	Max Tc	Z-Score	Name	Description
CC1=CC(=CC(=C1)C(=O)NNC(=O)C2=CC=CC=N2)C	GRM4_HUMAN	5	1.256e-78	0.48	139.407	GRM4	Metabotropic glutamate receptor 4
CC1=CC(=CC(=C1)C(=O)NNC(=O)C2=CC=CC=N2)C	KCNK9_HUMAN	5	1.17e-44	0.4884	78.4213	KCNK9	Potassium channel subfamily K member 9
CC1=CC(=CC(=C1)C(=O)NNC(=O)C2=CC=CC=N2)C	KCNK3_HUMAN	5	2.013e-35	0.4884	61.8407	KCNK3	Potassium channel subfamily K member 3
CC1=CC(=CC(=C1)C(=O)NNC(=O)C2=CC=CC=N2)C	SCNAA_HUMAN	5	1.186e-22	0.3509	38.9137	SCN10A	Sodium channel protein type 10 subunit alpha
CC1=CC(=CC(=C1)C(=O)NNC(=O)C2=CC=CC=N2)C	GRM5_HUMAN	5	3.826e-18	0.5	30.8195	GRM5	Metabotropic glutamate receptor 5
CC1=CC(=CC(=C1)C(=O)NNC(=O)C2=CC=CC=N2)C	KDM6B_HUMAN	5	1.11e-16	0.3488	28.3073	KDM6B	Lysine-specific demethylase 6B
CC1=CC(=CC(=C1)C(=O)NNC(=O)C2=CC=CC=N2)C	GP139_HUMAN	5	7.772e-16	0.3208	26.6545	GPR139	Probable G-protein coupled receptor 139
CC1=CC(=CC(=C1)C(=O)NNC(=O)C2=CC=CC=N2)C	KDM4E_HUMAN	5	4.396e-14	0.3488	23.5291	KDM4E	Lysine-specific demethylase 4E
CC1=CC(=CC(=C1)C(=O)NNC(=O)C2=CC=CC=N2)C	KLF5_HUMAN	5	5.185e-14	0.4314	23.4005	KLF5	Krueppel-like factor 5
CC1=CC(=CC(=C1)C(=O)NNC(=O)C2=CC=CC=N2)C	KDM3A_HUMAN	5	5.795e-14	0.3488	23.314	KDM3A	Lysine-specific demethylase 3A
CC1=CC(=CC(=C1)C(=O)NNC(=O)C2=CC=CC=N2)C	SMCA4_HUMAN	5	4.214e-12	0.2807	19.9723	SMARCA4	Transcription activator BRG1
CC1=CC(=CC(=C1)C(=O)NNC(=O)C2=CC=CC=N2)C	NRAM2_HUMAN	5	4.397e-12	0.322	19.939	SLC11A2	Natural resistance-associated macrophage protein 2
CC1=CC(=CC(=C1)C(=O)NNC(=O)C2=CC=CC=N2)C	SMO_HUMAN	5	7.195e-12	0.3443	19.5551	SMO	Smoothened homolog
CC1=CC(=CC(=C1)C(=O)NNC(=O)C2=CC=CC=N2)C	FTO_HUMAN	5	7.506e-12	0.3171	19.5222	FTO	Alpha-ketoglutarate-dependent dioxygenase FTO
CC1=CC(=CC(=C1)C(=O)NNC(=O)C2=CC=CC=N2)C	MITF_HUMAN	5	1.152e-11	0.4706	19.1881	MITF	Microphthalmia-associated transcription factor
CC1=CC(=CC(=C1)C(=O)NNC(=O)C2=CC=CC=N2)C	Q9BRH5_HUMAN	5	1.377e-11	0.3175	19.049	DGAT1	DGAT1 protein
CC1=CC(=CC(=C1)C(=O)NNC(=O)C2=CC=CC=N2)C	AGTR1_HUMAN	5	1.456e-11	0.4375	19.0053	AGTR1	Type-1 angiotensin II receptor
CC1=CC(=CC(=C1)C(=O)NNC(=O)C2=CC=CC=N2)C	HKDC1_HUMAN	5	1.733e-11	0.4894	18.8699	HKDC1	Putative hexokinase HKDC1
CC1=CC(=CC(=C1)C(=O)NNC(=O)C2=CC=CC=N2)C	KDM4A_HUMAN	5	3.618e-11	0.3488	18.2958	KDM4A	Lysine-specific demethylase 4A
CC1=CC(=CC(=C1)C(=O)NNC(=O)C2=CC=CC=N2)C	KPCB_HUMAN	5	3.638e-11	0.3231	18.2914	PRKCB	Protein kinase C beta type
CC1=CC(=CC(=C1)C(=O)NNC(=O)C2=CC=CC=N2)C	MPRI_HUMAN	5	9.211e-11	0.2857	17.5672	IGF2R	Cation-independent mannose-6-phosphate receptor
CC1=CC(=CC(=C1)C(=O)NNC(=O)C2=CC=CC=N2)C	BRD7_HUMAN	5	1.375e-10	0.2807	17.2547	BRD7	Bromodomain-containing protein 7
CC1=CC(=CC(=C1)C(=O)NNC(=O)C2=CC=CC=N2)C	SC6A7_HUMAN	5	4.277e-10	0.3137	16.37	SLC6A7	Sodium-dependent proline transporter
CC1=CC(=CC(=C1)C(=O)NNC(=O)C2=CC=CC=N2)C	EST1_HUMAN	5	8.681e-10	0.4694	15.8181	CES1	Liver carboxylesterase 1
CC1=CC(=CC(=C1)C(=O)NNC(=O)C2=CC=CC=N2)C	CATD_HUMAN	5	1.285e-09	0.3611	15.5125	CTSD	Cathepsin D
CC1=CC(=CC(=C1)C(=O)NNC(=O)C2=CC=CC=N2)C	PPGB_HUMAN	5	2.426e-09	0.4286	15.017	CTSA	Lysosomal protective protein
CC1=CC(=CC(=C1)C(=O)NNC(=O)C2=CC=CC=N2)C	TGFB1_HUMAN	5	7.091e-09	0.2879	14.1806	TGFB1	Transforming growth factor beta-1
CC1=CC(=CC(=C1)C(=O)NNC(=O)C2=CC=CC=N2)C	KDM4C_HUMAN	5	1.632e-08	0.3488	13.5307	KDM4C	Lysine-specific demethylase 4C
CC1=CC(=CC(=C1)C(=O)NNC(=O)C2=CC=CC=N2)C	KCNN1_HUMAN	5	2.016e-08	0.2963	13.366	KCNN1	Small conductance calcium-activated potassium channel protein 1
CC1=CC(=CC(=C1)C(=O)NNC(=O)C2=CC=CC=N2)C	HYEP_HUMAN	5	7.423e-08	0.3	12.3496	EPHX1	Epoxide hydrolase 1
CC1=CC(=CC(=C1)C(=O)NNC(=O)C2=CC=CC=N2)C	KDM5A_HUMAN	5	1.66e-07	0.3208	11.7221	KDM5A	Lysine-specific demethylase 5A
CC1=CC(=CC(=C1)C(=O)NNC(=O)C2=CC=CC=N2)C	CCR6_HUMAN	5	3.114e-07	0.3077	11.2315	CCR6	C-C chemokine receptor type 6
CC1=CC(=CC(=C1)C(=O)NNC(=O)C2=CC=CC=N2)C	IF4H_HUMAN	5	3.211e-07	0.283	11.2077	EIF4H	Eukaryotic translation initiation factor 4H
CC1=CC(=CC(=C1)C(=O)NNC(=O)C2=CC=CC=N2)C	PYGM_HUMAN	5	4.075e-07	0.3571	11.0219	PYGM	Glycogen phosphorylase, muscle form
CC1=CC(=CC(=C1)C(=O)NNC(=O)C2=CC=CC=N2)C	KCNN2_HUMAN	5	5.392e-07	0.2963	10.8035	KCNN2	Small conductance calcium-activated potassium channel protein 2
CC1=CC(=CC(=C1)C(=O)NNC(=O)C2=CC=CC=N2)C	KDM5C_HUMAN	5	5.642e-07	0.3488	10.7681	KDM5C	Lysine-specific demethylase 5C
CC1=CC(=CC(=C1)C(=O)NNC(=O)C2=CC=CC=N2)C	FPPS_HUMAN	5	7.465e-07	0.3111	10.5498	FDPS	Farnesyl pyrophosphate synthase
CC1=CC(=CC(=C1)C(=O)NNC(=O)C2=CC=CC=N2)C	MAP11_HUMAN	5	1.653e-06	0.4419	9.9301	METAP1	Methionine aminopeptidase 1
CC1=CC(=CC(=C1)C(=O)NNC(=O)C2=CC=CC=N2)C	KDM2A_HUMAN	5	1.753e-06	0.3488	9.8843	KDM2A	Lysine-specific demethylase 2A
CC1=CC(=CC(=C1)C(=O)NNC(=O)C2=CC=CC=N2)C	BCAT1_HUMAN	5	2.143e-06	0.2833	9.7277	BCAT1	Branched-chain-amino-acid aminotransferase, cytosolic
CC1=CC(=CC(=C1)C(=O)NNC(=O)C2=CC=CC=N2)C	SCN2A_HUMAN	5	3.245e-06	0.3396	9.404	SCN2A	Sodium channel protein type 2 subunit alpha
CC1=CC(=CC(=C1)C(=O)NNC(=O)C2=CC=CC=N2)C	RET4_HUMAN	5	4.586e-06	0.3115	9.1343	RBP4	Retinol-binding protein 4
CC1=CC(=CC(=C1)C(=O)NNC(=O)C2=CC=CC=N2)C	AA2AR_HUMAN	5	5.492e-06	0.3509	8.9939	ADORA2A	Adenosine receptor A2a
CC1=CC(=CC(=C1)C(=O)NNC(=O)C2=CC=CC=N2)C	PPBI_HUMAN	5	6.807e-06	0.3167	8.8265	ALPI	Intestinal-type alkaline phosphatase
CC1=CC(=CC(=C1)C(=O)NNC(=O)C2=CC=CC=N2)C	SENP7_HUMAN	5	9.251e-06	0.3529	8.5873	SENP7	Sentrin-specific protease 7

## Sheet: Tab3. PFI-63 Analogs
Supplementary Table S1, Tab3. ALK Driven Luciferase and CMV Luciferase of the 26 Analogs form Molecular Similarity Search of PFI-63
ID	Molecule	SMILES	logP	MW	Similary Score	Luciferase Assay
Compound 1		C1=CC=C(C=C1)C(=O)NNC(=O)C2=CC=CC=N2	1.665	241.25	0.8
Compound 2		C1=CC(=NC(=C1)C(=O)NN)C(=O)NN	-0.275	195.18	0.76
Compound 3		CC1=CC=CC(=C1)C(=O)NNC(=O)C2=CC(=CC=C2)C	3.094	268.31	0.72
Compound 4		CC(=O)NNC(=O)C1=CC=CC=N1	-0.246	179.18	0.71
Compound 5		CCC(=O)NNC(=O)C1=CC=CC=N1	0.263	193.2	0.7
Compound 6		C1=CC=NC(=C1)C(=O)NNC=O	0.082	165.15	0.69
Compound 7		C1=CC(=NC=C1C(=O)NN)C(=O)NN	-1.128	195.18	0.69
Compound 8		C1=CC(=NC(=C1)C(=O)NNC(=O)C2=CC(=C(C=C2)Cl)Cl)C(=O)NNC(=O)C3=CC(=C(C=C3)Cl)Cl	3.845	541.166	0.69
Compound 9		CC1=CC=CC(=C1)C(=O)NNC(=O)C2=CC=CC=C2	2.07	254.289	0.68
Compound 10		CCCC(=O)NNC(=O)C1=CC=CC=N1	0.773	207.23	0.68
Compound 11		CC1=C(C=C(C(=N1)C)C(=O)NNC(=O)C2=CC=CC=C2)C(=O)NNC(=O)C3=CC=CC=C3	1.848	431.452	0.66
Compound 12		CC(=O)NNC(=O)C1=NC=CN=C1	-0.482	180.16	0.66
Compound 13		C1=CN=C(C=N1)C(=O)NNC=O	-0.357	166.14	0.64
Compound 14		CC1=C(C=C(C(=N1)C)C(=O)NN)C(=O)NN	-1.472	223.23	0.63
Compound 15		C1=C(OC(=C1)C(=O)NN)C(=O)NN	-1.233	184.15	0.63
Compound 16		CC(=O)NNC(=O)C1=NC2=CC=CC=C2C=C1	1.049	229.23	0.63
Compound 17		CCC(CC)C(=O)NNC(=O)c1ccccn1	1.804	235.287	0.908
Compound 18		O=C(NNC(=O)c1ccccn1)c1ccccn1	0.926	242.238	0.889
Compound 19		Clc1ccc(CC(=O)NNC(=O)c2ccccn2)cc1	2.389	289.72	0.895
Compound 20		Cc1cc(C)cc(OCC(=O)NNC(=O)c2ccccn2)c1	2.694	299.33	0.779
Compound 21		CS(=O)(=O)NCCc1ccc(cc1)C(=O)NNC(=O)c1ccccn1	0.904	362.4	0.891
Compound 22		Cc1cc(C)cc(c1)C(=O)NNC(=O)c1ccc(O)cc1	2.89	284.315	0.536
Compound 23		COCc1cccc(c1)C(=O)NNC(=O)c1ccccn1	1.615	285.303	0.892
Compound 24		Cc1cccc(c1)C(=O)NNC(=O)c1ccccc1	2.719	254.289	0.64
Compound 25		CC(C)CC(=O)NNC(=O)c1ccco1	0.944	210.233	0.423
Compound 26 (PFI-90)		O=C(NNc1ccccn1)c1ccccn1	0.061	214.228	0.813
