# Supplementary material for: KDM3B inhibitors disrupt PAX3-FOXO1 oncogenic activity in fusion positive rhabdomyosarcoma.
Source: Research Square preprint supplement (doi:10.21203/rs.3.rs-2298627/v1), 2022-11-29
Supplement: Supplementary file 5 [file 90a7be5e153cfa81e83c70fc.xlsx]

## Sheet: Tab1. Myoblast L2FC Gene Set
Supplementary Table S4, Tab1. Myoblast Genes (Patel et el, Developmental Cell 2022)
Gene	myoblast mean	myocyte mean	Log2 Fold Change
FGF14	1.12141	0.0612058	4.19551
SCN9A	0.363697	0.0455412	2.99749
GAS2	1.11848	0.166838	2.74502
CENPE	0.237332	0.0375765	2.659
CTD-2034I4.1	0.28722	0.0458354	2.64762
C2orf48	0.274315	0.0442304	2.63272
LRRTM4	0.362906	0.0603907	2.5872
TOP2A	0.282748	0.0471928	2.58288
SPOCK1	0.558523	0.113405	2.30013
CENPF	0.484085	0.101654	2.25159
MKI67	0.229826	0.0492518	2.22229
CTC-340A15.2	1.1243	0.245865	2.19309
ASPM	0.376649	0.0858212	2.13382
GPC3	1.24661	0.292493	2.09154
KCNQ5	0.481632	0.118177	2.02698
ATAD2	0.491338	0.123162	1.99615
PDE4B	1.02277	0.263513	1.95653
CCDC26	0.171457	0.0447589	1.9376
LINGO2	0.348035	0.099241	1.81023
SPC25	0.268287	0.078066	1.78101
DIAPH3	0.924664	0.272174	1.7644
DPP10	0.340592	0.10034	1.76314
CIT	0.321294	0.095988	1.74297
C21orf58	0.248643	0.0766251	1.69819
PSMA1	0.405744	0.12512	1.69726
ST6GALNAC3	0.655198	0.20643	1.66628
CENPK	0.310754	0.0989641	1.6508
ARHGAP11B	0.515056	0.166408	1.63001
POLQ	0.325031	0.106071	1.61554
AC010967.2	0.651816	0.215474	1.59695
HELLS	0.418436	0.139269	1.58714
SMC4	0.468672	0.158435	1.56469
HPSE2	0.548634	0.188662	1.54004
ATRNL1	0.404437	0.139271	1.53802
ARHGAP15	0.253443	0.0889615	1.51041
CHRM3	0.836975	0.294056	1.50909
PLD5	0.543899	0.191643	1.50492
LINC00669	0.597227	0.211001	1.50103
CTC-550B14.7	0.31242	0.110416	1.50054
DACH2	0.260136	0.0956232	1.44383
DOCK10	0.760939	0.287113	1.40616
LTBP1	0.779649	0.296734	1.39365
PRKCE	0.908076	0.349101	1.37917
ROBO2	0.577837	0.226469	1.35135
BCL2L14	1.00178	0.405448	1.30497
RIMS2	0.364454	0.148885	1.29154
SEMA5A	0.62037	0.255148	1.28179
DLGAP1	1.39715	0.60217	1.21425
CDH4	0.919768	0.397379	1.21075
PAX7	0.858705	0.37142	1.20911
GPC6	2.88025	1.24928	1.2051
RP11-123O10.4	0.957257	0.424165	1.17428
BMPR1B	0.587931	0.26066	1.17348
RP11-184M15.2	0.442609	0.200147	1.14497
CREB5	1.44007	0.651738	1.14378
CNKSR3	0.83251	0.377011	1.14286
CCDC3	0.486401	0.223967	1.11886
PDGFC	1.03749	0.479376	1.11387
NLGN1	1.32793	0.619963	1.09892
MIS18BP1	0.389763	0.185685	1.06974
SLC22A3	0.290113	0.139732	1.05395
IGFBP2	0.692919	0.335687	1.04557
MMS22L	0.538887	0.267752	1.00908
PRKD1	0.555058	0.276727	1.00417
SYNE2	0.756956	0.378575	0.99963
RP11-179A16.1	0.236042	0.118497	0.994198
MCTP1	0.436167	0.219483	0.990775
PDE3B	0.557433	0.280725	0.989642
CPSF6	1.48852	0.750258	0.988422
MARK1	0.565971	0.287435	0.977492
DACH1	0.484261	0.249418	0.957216
DNM3	0.981001	0.505592	0.956282
EZH2	0.567727	0.29286	0.954985
CACNA1A	0.597726	0.312046	0.937723
NTRK3	0.489015	0.255339	0.937464
HIST1H4C	0.304153	0.159438	0.931798
GRIP1	1.15765	0.607689	0.929799
RP11-120D5.1	0.403898	0.213107	0.922415
NRG3	0.593145	0.315227	0.911993
KCNIP1	0.573804	0.307606	0.899474
BTBD11	0.555076	0.298283	0.896004
WHSC1	0.656339	0.355279	0.885488
PWRN1	0.427118	0.232916	0.874824
ROBO1	2.20384	1.20343	0.872863
IL17RD	0.711988	0.389672	0.869593
FAT3	1.90621	1.05454	0.854092
PTMA	0.779336	0.435368	0.840011
AC004158.2	0.472328	0.264001	0.839247
BRIP1	0.457661	0.25847	0.824282
GPR98	0.304778	0.172429	0.821754
ITIH5	0.313361	0.17753	0.819762
SLC35F3	0.56803	0.324451	0.807965
CUX2	0.563204	0.322645	0.803711
RFC3	1.24535	0.725421	0.779661
HSP90AA1	1.53011	0.892028	0.778471
GNGT1	0.358272	0.210066	0.770212
NFIA	3.07933	1.82804	0.752323
ATAD5	0.447309	0.266611	0.746535
LRFN5	0.926795	0.553328	0.744115
RP11-429O1.1	0.303776	0.184383	0.7203
RANBP17	0.732269	0.444745	0.719395
LHFPL3	0.319759	0.194562	0.71676
TENM3	2.32314	1.41397	0.716327
RP11-499F3.2	0.335021	0.20541	0.705747
CACNA2D3	1.77726	1.11054	0.678386
AC016831.7	1.24075	0.776709	0.675768
DCC	0.290239	0.181963	0.6736
PDE10A	0.625278	0.39281	0.670665
MEST	1.84517	1.16787	0.659867
BMP5	0.775264	0.491234	0.658275
RPS20	0.645553	0.410542	0.653004
SOX4	0.80229	0.515776	0.637378
RPS24	1.0989	0.717905	0.614189
KCNIP4	1.3046	0.85356	0.612047
RPS27	0.404336	0.265294	0.607961
FOXP1	1.59044	1.04576	0.604875
NFIB	2.37962	1.56585	0.603785
RPL14	1.15647	0.76237	0.601163
TUBA1B	0.458974	0.302584	0.601075
AP001347.6	0.851441	0.5622	0.598823
SSBP2	1.45503	0.96125	0.598066
RPL8	1.05201	0.698921	0.589941
RPS8	1.12718	0.749699	0.588339
ZMAT4	0.525088	0.349819	0.585953
PKP4	0.961368	0.643142	0.579951
HMGA2	1.90494	1.27938	0.574302
RPLP2	0.765018	0.51946	0.558482
PTPRT	2.48884	1.69101	0.557582
CDHR3	0.462772	0.314827	0.555743
PLEKHA7	0.892039	0.616576	0.532828
RPL7	1.71749	1.18884	0.530747
RPL19	0.871821	0.608184	0.519524
RPL23A	0.757253	0.528544	0.518753
RPS12	0.838056	0.585557	0.517238
NCKAP5	0.678969	0.47476	0.516146
RPL30	1.23774	0.866994	0.513617
RPL38	0.530668	0.371815	0.513225
RPL29	1.23616	0.869591	0.507458
KANK1	0.799403	0.563497	0.504516
RASGRF2	0.463769	0.327586	0.501534
SNTG2	0.717218	0.50831	0.496703
RPS6	1.11564	0.792427	0.493521
TUBB	0.434832	0.309845	0.488911
HSP90AB1	0.689852	0.492729	0.485492
RPL13A	1.45704	1.04285	0.482512
OOEP	0.733831	0.52565	0.481345
RPL21	0.559021	0.401212	0.478538
RPS11	0.922937	0.662707	0.477862
RPL28	0.813795	0.584961	0.476326
RPS25	0.553982	0.399524	0.471556
TXNRD1	1.22518	0.885679	0.468143
RPL41	1.18169	0.856093	0.465009
RPS15	1.13104	0.819715	0.464453
ZNF90	0.696675	0.504934	0.464392
RPL5	0.959977	0.696053	0.463802
RPL23	0.733324	0.531986	0.463061
TMSB10	0.620284	0.450605	0.461067
SLC38A1	1.21319	0.88135	0.461018
RPS14	0.994144	0.722767	0.459923
RPL27A	1.56421	1.13813	0.458769
RPL13	2.24515	1.6361	0.456547
NUCKS1	0.832733	0.607293	0.455462
RPL35	0.69083	0.504626	0.453115
RPL6	1.01658	0.744649	0.449095
RPL32	0.721588	0.529067	0.447724
SGMS1	0.671686	0.492553	0.447509
RPL37A	1.19554	0.881441	0.439727
KIRREL3	0.88161	0.650674	0.438205
RPL11	1.54458	1.14006	0.438102
RPS13	0.538037	0.397391	0.437147
RPL34	0.545915	0.404296	0.433266
RPL4	0.791658	0.586427	0.432925
RPS23	1.3027	0.965113	0.432733
TLN2	1.22188	0.905271	0.43268
RPS18	0.980142	0.727561	0.429923
RPLP1	1.2286	0.912606	0.428955
RPL10	1.65666	1.23798	0.420282
CHN1	0.813781	0.608543	0.419281
RPL27	0.514034	0.385497	0.415144
ZNF536	1.08184	0.812382	0.413259
HMCN2	0.324252	0.244247	0.408776
PRIM2	0.784562	0.59263	0.404755
VIM	1.38644	1.04751	0.404418
PTCHD4	0.394495	0.299196	0.398918
RPS2	1.44611	1.09719	0.398361
TMEM132B	0.525872	0.399839	0.395294
RPS19	1.76886	1.34602	0.394112
RPL10A	0.882051	0.671288	0.39393
RPLP0	1.26103	0.96124	0.391637
RPS3A	0.65257	0.497454	0.391571
RPL36	0.79351	0.607024	0.386494
7SK.2	0.595649	0.456166	0.384904
MYO1E	1.11647	0.855779	0.383636
NKAIN3	1.68937	1.29784	0.380376
RP11-366L20.2	0.573718	0.441037	0.37944
RPS16	0.618015	0.476887	0.373993
RPL35A	0.783795	0.607827	0.366816
RPS7	0.924818	0.718686	0.363809
DISC1	1.12931	0.879072	0.361385
XPO5	0.899381	0.701532	0.358424
HNRNPA1	0.631129	0.493085	0.356099
MTMR7	0.468157	0.366257	0.354137
APOO	1.55704	1.22395	0.347269
BAIAP2L1	1.3133	1.03292	0.346465
CASC15	1.19103	0.936777	0.346427
RPS3	2.05347	1.61513	0.346417
GPHN	2.43661	1.92456	0.340347
ZFAS1	0.719987	0.569075	0.339352
SPATA5	0.783561	0.619997	0.337783
SORCS1	1.12393	0.889369	0.337697
AMBRA1	1.66182	1.31647	0.336086
RPL15	1.76572	1.41085	0.323689
RAD18	0.579938	0.46345	0.323484
RPS4X	1.26709	1.01521	0.319751
RPL18	0.84121	0.674184	0.319322
TPT1	1.20989	0.970289	0.318391
PRKAG2	0.46868	0.376299	0.316724
APP	1.82818	1.47032	0.314285
RPL3	1.32077	1.06489	0.310677
RPS9	1.28634	1.03713	0.310673
GNB2L1	0.949894	0.766036	0.310354
GABRB3	0.813347	0.656688	0.308664
RPS27A	1.37429	1.11059	0.307363
RPSAP58	1.05149	0.853077	0.301688
VGLL3	0.665707	0.540796	0.299804
CDK6	1.87744	1.52832	0.296823
RPL37	0.734559	0.598384	0.295808
RPL7A	0.846863	0.69678	0.281426
EEF1A1	2.07541	1.71031	0.279136
AUTS2	5.92994	4.90737	0.273069
TMEM132D	1.1676	0.968316	0.270002
RPSA	0.748176	0.620529	0.269878
GAPDH	0.756901	0.630343	0.263966
ARHGAP26	2.03798	1.70289	0.259152
XKR6	0.851853	0.711912	0.258905
ACTG1	1.57669	1.31813	0.258408
RPS5	0.681588	0.570626	0.256354
C9orf3	1.43123	1.20748	0.245253
SPATS2L	3.5665	3.08098	0.211117
NNAT	0.818848	0.715927	0.193782
ZNF704	1.81623	1.60654	0.176983
MT-ATP6	4.50668	3.9871	0.176725
NOS1	1.36028	1.20754	0.171826
CEP128	0.794458	0.706317	0.169655
RYR2	1.02862	0.915185	0.168574
ZRANB3	1.06463	0.950055	0.164272
EEF2	1.32109	1.18617	0.155415
AC105402.4	2.98958	2.69639	0.148912
DHFR	1.57254	1.42983	0.137254
MT-CO3	5.64366	5.13262	0.136936
EYA4	1.50524	1.36991	0.135906
XIST	0.902858	0.823689	0.132399
RP11-191L9.4	2.15906	1.97223	0.130573
GNAS	1.77432	1.62824	0.123954
NACA	0.991238	0.921135	0.105819
CHCHD3	1.79171	1.6687	0.102613
MT-CO1	3.68243	3.43059	0.102202
IGF2	3.33393	3.10714	0.101637
MT-CO2	4.11332	3.85892	0.0921066
SLC25A6	0.573735	0.538829	0.0905581
CSMD1	1.72106	1.61702	0.0899674
WWOX	2.49847	2.35292	0.0865948
SNX29P2	2.52364	2.40095	0.0718953
GALNTL6	0.502874	0.482531	0.0595766
SRRM4	0.710696	0.682446	0.0585197
ZNF804A	0.849672	0.815969	0.058392
MT-ND3	4.47116	4.3011	0.0559411
DLGAP2	0.522899	0.50325	0.0552562
JAKMIP2	0.91901	0.890201	0.0459491
MT-CYB	2.95109	2.86183	0.0443086
MT-ND2	2.58558	2.56305	0.0126242
NAV2	3.88799	3.88555	0.000906117
ANKS1B	1.28432	1.28987	-0.00622807
MT-ND4	3.69607	3.71345	-0.00676854
NELL1	2.36791	2.38843	-0.0124445
TFAP2B	0.662712	0.679003	-0.035036
DIO2-AS1	0.545048	0.560006	-0.0390608
FGFR4	0.604611	0.623514	-0.044415
ALK	1.21397	1.26033	-0.0540705
SSH2	1.97775	2.05403	-0.0545986
MAGI1	4.15269	4.33604	-0.0623297
SULF2	0.83808	0.894672	-0.0942712
EYA2	1.61218	1.72762	-0.0997745
RNF150	1.84138	2.01275	-0.128384
KLHL29	1.87357	2.06304	-0.138981
MPPED2	1.53401	1.68975	-0.139499
DIO2	0.924945	1.07701	-0.219587
XRN1	1.84049	2.1679	-0.236209
RBFOX1	1.87717	2.22599	-0.245887
WSCD1	1.88757	2.46845	-0.38708
CADM2	4.90952	6.57766	-0.421992

## Sheet: Tab2. Myocyte L2FC Gene Set
Supplementary Table S4, Tab2. Myocyte Genes (Patel et el, Developmental Cell 2022)
Gene	myoblast mean	myocyte mean	Log2 Fold Change
MIR1-2	0.00936147	0.214625	4.51894
MYH3	0.140516	2.30696	4.03719
CASQ2	0.0272856	0.392062	3.84487
PTGFR	0.0236135	0.338544	3.84166
MIR133BHG	0.0167415	0.211402	3.65849
ASB5	0.0412296	0.483592	3.55204
SPAG6	0.0232331	0.262639	3.49883
C12orf42	0.0200825	0.214022	3.41375
CACNA1S	0.0238274	0.242738	3.34871
MYOM3	0.0352733	0.356284	3.33638
TRDN	0.0683187	0.675109	3.30477
CD36	0.0238799	0.235259	3.30038
UNC45B	0.045433	0.434748	3.25837
MYOM1	0.0600284	0.569493	3.24596
MYH7B	0.02524	0.238791	3.24196
MYH8	0.0275767	0.231327	3.06841
MYPN	0.0827404	0.685919	3.05137
RP11-202G18.1	0.0507281	0.417199	3.03988
ANKRD1	0.0314431	0.256171	3.02629
RP11-369K17.1	0.0438657	0.354956	3.01647
RP11-814P5.1	0.0905683	0.706437	2.96348
AP000857.3	0.0888649	0.680852	2.93766
PDZRN4	0.04613	0.339172	2.87824
CTD-2537O9.1	0.278761	1.96413	2.81679
SEPT4	0.0395034	0.272447	2.78593
CASS4	0.113056	0.773945	2.77519
RP11-160H12.2	0.088432	0.586966	2.73064
SAMD3	0.0458042	0.304013	2.73058
SHISA9	0.120994	0.786201	2.69996
AC007970.1	0.0964534	0.623314	2.69205
ALPK2	0.054858	0.345282	2.654
DAPK2	0.0602422	0.368747	2.61378
CHRNG	0.0741668	0.42189	2.50802
TNNT3	0.083138	0.472786	2.50761
SERPINI1	0.0417104	0.234718	2.49245
WNT9A	0.0619512	0.34765	2.48843
DYNC1I1	0.22901	1.27578	2.4779
SCN3A	0.0627701	0.344671	2.45707
KIFC3	0.0769773	0.419577	2.44643
LA16c-366D3.1	0.0629885	0.340352	2.43387
JPH2	0.0700809	0.371366	2.40575
DYSF	0.130594	0.687063	2.39535
LINC00922	0.0673802	0.352024	2.38528
ITGB6	0.128412	0.660667	2.36314
MYOZ2	0.0857606	0.437769	2.35178
LDB3	0.158148	0.793491	2.32694
AFAP1L1	0.047761	0.239406	2.32556
DGKB	0.166603	0.826616	2.3108
DLG2	2.96442	14.5864	2.29881
PRUNE2	0.218826	1.07466	2.29603
RP11-446H18.5	0.077375	0.373938	2.27286
FBXO32	0.0715802	0.33962	2.24629
RP11-644C3.1	0.0540993	0.248416	2.19908
GRIN3A	0.0594874	0.272774	2.19705
FILIP1	0.175293	0.800288	2.19075
MTSS1	0.551007	2.46529	2.16162
ACTN2	0.209201	0.934559	2.1594
KREMEN2	0.125552	0.553994	2.14159
MYO16	0.450987	1.98506	2.13802
RBM24	0.189335	0.824329	2.12228
DCLK1	0.491322	2.12665	2.11384
AL592494.5	0.0640224	0.274865	2.10208
DDX60L	0.0999795	0.428633	2.10004
MYLPF	0.0628635	0.268645	2.09541
SMOC1	0.0978524	0.416436	2.08942
BEST3	0.0877324	0.362911	2.04843
SYNPO2	0.109014	0.450914	2.04834
LRRN1	0.463869	1.86361	2.00631
FHOD3	0.109426	0.437253	1.99851
CTD-2545M3.8	0.470947	1.87071	1.98995
ARPP21	0.49571	1.95913	1.98264
SLC24A2	0.0795118	0.302372	1.92708
ABLIM3	0.13446	0.50356	1.90499
MEF2C	0.443069	1.64936	1.89631
ACTA1	0.0811837	0.302099	1.89576
RP11-223C24.1	0.155745	0.578658	1.89353
TP63	0.12174	0.450177	1.88668
MYL1	0.128118	0.47373	1.88659
INPP4B	0.622925	2.28651	1.87602
CHRND	0.202668	0.74073	1.86983
PLCL2	0.186268	0.678701	1.8654
ELMO1-AS1	0.107565	0.391443	1.86359
AC007682.1	0.0690961	0.250861	1.86021
DEPTOR	0.17155	0.618289	1.84965
MYL4	0.210077	0.752883	1.84151
HCN1	0.12115	0.429256	1.82504
IFNG-AS1	0.0982845	0.3471	1.82032
REEP1	0.108728	0.383502	1.81851
A2M	0.0640274	0.225621	1.81714
CBLN2	0.114904	0.404283	1.81493
GPC4	0.102417	0.355136	1.79392
ABLIM2	0.0736674	0.253492	1.78284
TMEM72-AS1	0.0846663	0.291168	1.78199
CXCL13	0.0767127	0.262252	1.77341
MIR503HG	0.399838	1.35613	1.76201
RP11-296O14.3	0.121249	0.410772	1.76037
TMEM38A	0.106887	0.360761	1.75496
RP11-32K4.1	0.0903201	0.301156	1.73739
NKAIN2	0.08401	0.279653	1.735
SORBS2	0.128181	0.42382	1.72527
RP11-87H9.3	0.246404	0.813051	1.72232
ACTC1	0.528547	1.72287	1.70471
LMO7	0.149306	0.477822	1.6782
AKAP6	0.576846	1.84507	1.67741
GPR123	0.0857091	0.274089	1.67713
RGR	0.0997656	0.313242	1.65066
CHST11	0.353065	1.10678	1.64837
EIF4E2	0.210184	0.652908	1.63523
FNDC5	0.541418	1.67569	1.62994
SMYD1	0.226211	0.700047	1.62978
SRL	0.226365	0.700024	1.62875
PSEN2	0.0885083	0.27033	1.61084
MAMDC2-AS1	0.155326	0.473924	1.60936
SHROOM3	0.196391	0.596023	1.60164
EML6	0.0934901	0.283616	1.60105
CCDC141	0.417776	1.26732	1.60099
KCTD16	0.156229	0.472525	1.59673
SRPK3	0.105738	0.319444	1.59507
CTNNA2	0.0662204	0.197868	1.57919
ANKRD44	0.202475	0.601345	1.57045
TTN-AS1	0.574629	1.68753	1.55421
CLSTN2	0.682592	2.00252	1.55272
MYLK4	0.240608	0.700994	1.54272
NDUFB9	0.167288	0.48451	1.53419
NEXN	0.252786	0.726913	1.52387
B4GALNT3	0.402142	1.15221	1.51862
TTN	2.87999	8.24525	1.5175
SEMA3D	0.152607	0.431613	1.49991
SNTB1	0.878029	2.46842	1.49125
GPC1	0.145624	0.406801	1.48207
DMD	0.972773	2.71553	1.48106
PALLD	1.36631	3.80665	1.47824
TRIM55	0.436272	1.21374	1.47616
DPP6	1.48625	4.10927	1.4672
MYO10	0.538286	1.48689	1.46586
SYT1	0.156662	0.432488	1.46501
RP11-154D6.1	0.0996967	0.275094	1.46431
ZNF106	0.675936	1.85853	1.4592
TMCC2	0.102657	0.27999	1.44754
RP3-399L15.3	0.268257	0.726282	1.43691
CTD-2058B24.2	0.163962	0.443757	1.43641
CHRNB1	0.102193	0.275278	1.42959
HDAC9	0.137898	0.371431	1.42949
STK10	0.121184	0.325807	1.42682
LIMK2	0.147283	0.395867	1.42643
ELMO1	1.34242	3.56842	1.41044
IQCA1	0.118646	0.313461	1.40162
RP11-594N15.2	0.138549	0.365948	1.40124
OBSCN	0.189429	0.494439	1.38414
RASSF4	0.471368	1.22711	1.38033
LINC00882	0.316618	0.823858	1.37965
LIMA1	0.251832	0.64781	1.36311
SPG21	0.140134	0.359791	1.36035
C4orf19	0.17397	0.445833	1.35766
AC092839.3	0.133907	0.342956	1.35679
TNNI1	0.267078	0.678473	1.34503
ITGA6	0.149015	0.377339	1.34041
PXN	0.221862	0.561466	1.33954
RP11-154H12.3	0.154082	0.389646	1.33847
SASH1	0.477075	1.1887	1.31709
CAP2	0.740263	1.8435	1.31634
UFL1-AS1	0.141894	0.352518	1.31288
MACF1	1.64082	4.0727	1.31157
CACNA2D4	0.144911	0.358507	1.30683
PDLIM5	0.494254	1.21949	1.30295
NEB	1.77474	4.36989	1.29999
COBL	0.934558	2.29935	1.29887
BIN1	0.184904	0.454682	1.29809
LAMA2	0.50078	1.22872	1.2949
CYB5R1	0.133759	0.327978	1.29397
RELL1	0.177193	0.431691	1.28468
PDE4DIP	0.727446	1.76284	1.27699
C20orf166-AS1	0.172149	0.416701	1.27535
SETD7	0.179158	0.433554	1.27498
ADCY2	0.189209	0.457529	1.27388
FRAS1	0.529786	1.27942	1.27201
TPM3	0.188562	0.454993	1.27081
RBM20	0.523413	1.26141	1.26902
KIAA0226L	0.126045	0.30371	1.26876
ESRRG	0.474433	1.12664	1.24775
RP11-436D23.1	0.351822	0.832793	1.24311
ENPP6	0.119206	0.281268	1.23848
GYS1	0.150338	0.353061	1.23171
PLS3	0.334796	0.784961	1.22934
TNNT2	0.543532	1.26815	1.22229
SIRT2	0.377703	0.876196	1.214
PGM5	0.337534	0.780043	1.20852
SLC4A4	0.210389	0.485017	1.20498
WDR44	0.245785	0.563385	1.19673
ERBB3	0.155296	0.348738	1.16712
NPNT	0.227831	0.51124	1.16604
SGK223	0.206156	0.460319	1.1589
TGFB2	0.261195	0.581661	1.15505
PLXNA4	0.276569	0.614796	1.15247
CCDC64	0.153854	0.34092	1.14787
RP11-260M19.2	0.261533	0.579357	1.14746
SUMF1	0.745604	1.64898	1.14509
STAC3	0.292989	0.646686	1.14222
HS3ST5	0.159138	0.350518	1.13921
JAM3	0.86233	1.89317	1.13449
SAMD4A	1.80415	3.94256	1.12781
ATP2B1	0.846555	1.84796	1.12626
MTSS1L	0.178341	0.387424	1.11928
WWTR1	0.569334	1.23645	1.11885
CCDC39	0.135776	0.293427	1.11178
HIPK3	0.443282	0.955127	1.10747
LAMA5	0.171943	0.368565	1.09999
BLCAP	0.537931	1.1523	1.09903
TACC2	0.242431	0.518593	1.09703
ADAM12	0.889829	1.89006	1.08683
EFTUD2	0.270361	0.572978	1.08359
SMC5-AS1	0.253146	0.535523	1.08098
PLXNA2	0.587275	1.23721	1.07498
PKIA	0.509097	1.07185	1.07409
TNIK	0.966108	2.02835	1.07005
RYR1	1.2281	2.57624	1.06884
FAM65B	0.508296	1.062	1.06304
HIVEP2	0.316022	0.659877	1.06217
LZTS1	0.200201	0.417392	1.05996
CASZ1	0.3165	0.658818	1.05767
SDK2	0.586057	1.21851	1.056
RP11-554F20.1	0.168376	0.350077	1.05599
CCSER1	0.860467	1.78732	1.05461
ARHGEF6	0.197879	0.408938	1.04726
AC096669.2	0.222171	0.458262	1.0445
VASH2	0.386988	0.79726	1.04276
SEMA6B	0.192398	0.396093	1.04175
ADCK3	0.229004	0.471354	1.04144
PPFIA4	0.415824	0.855793	1.04129
DMPK	0.26517	0.542546	1.03283
FGF7	0.205955	0.421377	1.03278
LINC00883	0.19464	0.397221	1.02913
FAM227B	0.301497	0.614702	1.02775
SEPW1	0.275623	0.560899	1.02505
ANTXR2	0.262272	0.533069	1.02326
CELA2B	0.168805	0.341784	1.01772
COL25A1	1.06538	2.13472	1.00267
RP11-343N15.1	0.421253	0.84326	1.00129
HIP1	0.703409	1.40739	1.00059
ZSWIM6	1.16215	2.32242	0.998838
MEGF10	2.03706	4.06182	0.995639
UBE2E3	0.615817	1.22487	0.992054
FGF13	0.874554	1.73884	0.991508
TEAD4	0.199822	0.394892	0.982746
HES6	0.383998	0.757723	0.98057
CHRNA1	0.517206	1.01931	0.978776
ARHGAP39	0.371172	0.731427	0.978625
HS6ST2	0.907494	1.78367	0.974889
CTNNA3	0.444258	0.870108	0.969796
TSPAN12	0.218571	0.426637	0.964909
CHN2	0.308414	0.599091	0.957907
RP11-732M18.3	0.325681	0.631444	0.955193
TMEM108	0.565147	1.09469	0.953828
RNF217	0.333064	0.644578	0.952553
OLFML2A	0.222198	0.428242	0.946578
NES	0.495019	0.953901	0.946354
CNTN5	0.802903	1.53604	0.935918
HIST1H2AC	0.200372	0.382889	0.934245
STIM2	0.462197	0.881718	0.931807
AGBL1	0.482937	0.919551	0.929094
AC096669.3	0.216908	0.412546	0.927471
SMC6	1.40992	2.67484	0.923845
ZC3H12C	0.255111	0.481896	0.917595
SCN3B	0.21399	0.403046	0.913404
FAM178A	1.20277	2.26034	0.910175
SPTAN1	0.367138	0.688956	0.90809
CDH15	0.509572	0.954882	0.906037
CCNG2	0.462053	0.865786	0.905953
COL18A1	0.591902	1.10495	0.900545
CNOT6L	0.300436	0.557398	0.891651
ST6GALNAC5	1.1369	2.1025	0.887005
IL7	0.294632	0.54483	0.886891
FOXP2	0.724758	1.33067	0.87658
PPP1R12B	0.810942	1.48781	0.875521
MUSK	0.323976	0.593501	0.873361
TULP4	1.51578	2.77543	0.872648
INPPL1	0.311111	0.56814	0.86882
CKB	0.334174	0.606945	0.860968
MYOG	0.414256	0.745581	0.847843
DES	0.398147	0.716429	0.847521
RIN2	0.287502	0.516097	0.844069
TMCC1	0.86961	1.55988	0.842999
EPHB1	0.474313	0.849564	0.840884
TNFRSF19	0.302133	0.540534	0.8392
SOX6	1.26368	2.25844	0.837692
ACOT11	0.275131	0.490728	0.834802
KIF9-AS1	0.259579	0.46106	0.828782
CTB-118N6.3	0.452635	0.803491	0.827935
ACYP2	0.731359	1.29501	0.824313
ATP1B3	0.257973	0.456738	0.824147
PGBD5	0.630906	1.11451	0.820907
FSTL4	0.217732	0.384501	0.820434
SGCD	1.98687	3.49353	0.814192
STARD13	1.58665	2.78253	0.810409
AC090044.1	2.02708	3.55442	0.81021
NCALD	1.17255	2.04334	0.801282
DNAH17	0.25592	0.445034	0.798222
ITPK1	0.265078	0.460557	0.79696
ANKS1A	0.601029	1.03884	0.78946
SLC24A3	2.38199	4.11241	0.787818
CAV3	0.262744	0.452998	0.785847
SEL1L3	0.517573	0.884547	0.773176
MAML3	0.696506	1.18805	0.770391
ARHGEF3	0.981494	1.67042	0.767163
ABLIM1	0.677976	1.15316	0.766293
RGS7	1.68474	2.85784	0.762402
DAG1	0.272796	0.462564	0.761833
PRKAR1A	0.253829	0.429736	0.759597
RP11-1L12.3	0.449127	0.758036	0.755143
PCDH15	0.280161	0.472653	0.754526
KCND3	0.558	0.9412	0.754236
MCU	0.682664	1.14898	0.751107
TBC1D1	0.407146	0.685191	0.75096
PTPRD	3.70742	6.21776	0.74598
ZC2HC1A	0.426092	0.712402	0.741526
CCSER2	0.624095	1.04342	0.741488
SYT17	0.29127	0.486521	0.740144
RP11-319G6.1	0.342011	0.571033	0.73953
ASTN2	1.46417	2.44208	0.738032
PAK3	0.440235	0.732122	0.733811
SVIL	1.44269	2.39318	0.730168
AC131097.3	0.394241	0.653866	0.729918
SESN1	0.393272	0.651752	0.728798
DTWD1	0.349922	0.578193	0.724518
FAM101A	0.347903	0.574304	0.723129
SLC38A6	0.521549	0.85985	0.721283
MAMDC2	0.622566	1.02592	0.720613
RUNX1	1.19083	1.95591	0.715874
RRAS2	0.33078	0.543258	0.715765
ANKRD10	1.23352	2.02449	0.714779
LRRFIP1	1.2937	2.12043	0.712855
PPM1E	0.427391	0.699382	0.710524
MYO18B	1.86693	3.04017	0.703482
PPM1H	0.634654	1.03276	0.702456
FOXO1	0.982245	1.59578	0.700106
ABR	0.373191	0.605995	0.69939
NCOA1	4.6116	7.4865	0.699024
UNC80	0.432417	0.698893	0.692648
MLIP	0.481444	0.778104	0.692595
FGD4	0.515978	0.830208	0.686165
MAP2K1	0.453599	0.729535	0.68556
VAV3	0.231789	0.370675	0.67734
MICU1	0.57659	0.912098	0.661644
BCAT1	0.804925	1.273	0.661309
ELAVL2	0.312393	0.49192	0.655061
ASIC2	0.47503	0.747805	0.654644
DTNA	0.343674	0.536546	0.642658
LRRFIP2	0.569654	0.888408	0.641137
KREMEN1	0.546713	0.851936	0.639962
NR3C2	0.338507	0.526928	0.63842
SEMA6A	1.14523	1.77845	0.634985
ZNRF2	0.460618	0.713072	0.630478
GEN1	0.394971	0.610148	0.627413
MTHFD1L	0.545669	0.8424	0.62648
PRKCH	0.281405	0.433598	0.623707
QKI	1.85254	2.84734	0.620106
C5orf17	0.399676	0.614214	0.619909
OLFML2B	0.489141	0.749889	0.616427
BCAR3	0.469402	0.718903	0.614972
RTN4	0.968619	1.4817	0.61325
SYNE1	0.521087	0.795036	0.609496
NIN	0.416382	0.634239	0.607117
NFASC	0.322489	0.490626	0.605375
DENND1A	1.02479	1.55599	0.60251
ARHGEF7	1.13655	1.72494	0.601878
RP11-14N7.2	2.8413	4.31176	0.601727
ZNF521	0.922585	1.39919	0.60084
DST	1.80296	2.72824	0.597605
KIAA1217	1.74779	2.64385	0.597105
RHOBTB3	0.894691	1.34754	0.590865
KCNN3	0.848623	1.27776	0.590423
ATP2A2	0.684755	1.03025	0.589331
PLCE1	0.576111	0.866355	0.58861
ANK2	2.2002	3.30572	0.587331
TRAM2	0.391176	0.58636	0.583971
SPTBN1	1.23562	1.85212	0.583951
PARK2	0.540774	0.809212	0.581492
CD82	0.413169	0.616846	0.578178
CELF2	3.25282	4.85031	0.576384
TTLL7	0.530053	0.789706	0.575177
SRGAP2	0.865653	1.28769	0.572923
ARHGAP24	1.04154	1.54815	0.571827
NCAM1	2.33069	3.46019	0.570093
MIR181A2HG	0.584647	0.865726	0.566343
CACNA2D1	1.01511	1.50105	0.564333
KANK4	0.598361	0.884739	0.564236
CDH13	1.71986	2.541	0.563103
RALGPS2	1.05467	1.55635	0.561367
CBR4	0.756177	1.11534	0.560686
KIF1B	0.846599	1.24546	0.556933
RBPJ	1.17745	1.72741	0.55295
NR6A1	0.864997	1.26864	0.552521
RP11-25H12.1	0.581588	0.852627	0.551918
ACVR2A	1.22016	1.78744	0.550821
ABCC5	0.485174	0.706573	0.542337
CNR1	0.861963	1.25432	0.541201
CORO1C	0.573918	0.833973	0.539156
KCNQ1	2.41844	3.51029	0.537515
GTDC1	1.06394	1.54354	0.536826
PLD3	0.532469	0.770753	0.533572
RP11-40F8.2	0.518927	0.750559	0.532436
LRBA	1.1369	1.63758	0.526463
EPB41L2	0.816464	1.17345	0.523293
CRADD	0.493988	0.706658	0.516536
MEG3	3.10686	4.42439	0.510023
MAP2	0.827744	1.17811	0.509219
RBFOX2	2.06081	2.93307	0.509197
RP1-209A6.1	1.4634	2.08192	0.508594
CHD7	1.27723	1.81424	0.506342
FRMPD1	0.463977	0.649441	0.485147
MED13L	2.54778	3.56557	0.484893
SNURF.1	0.849483	1.18536	0.480673
RP11-108K3.1	0.590278	0.822806	0.479157
MLLT3	0.955025	1.32444	0.471767
KIF26B	1.21779	1.68327	0.466996
MICU2	0.685913	0.937189	0.450314
TRIO	2.45343	3.35208	0.450258
NRCAM	0.799603	1.08876	0.445335
SKP2	0.624502	0.846696	0.439138
AKAP9	1.23054	1.66002	0.431908
FBXL17	0.951689	1.28382	0.431877
PITPNM3	0.514628	0.6925	0.428286
TTC3	1.66224	2.23297	0.42584
CADM2	4.90952	6.57766	0.421992
MARCH3	1.32425	1.77241	0.420533
AKAP13	1.47574	1.96402	0.412377
WSCD1	1.88757	2.46845	0.38708
PDLIM3	1.29466	1.68989	0.384353
ABAT	0.642815	0.836195	0.379437
FAM155A	0.937975	1.21894	0.378003
ANK3	1.243	1.61194	0.374977
CLCN5	2.03062	2.62291	0.369252
MEG8	1.1518	1.48694	0.368452
ENAH	1.89777	2.44636	0.366331
UBE2E2	1.36705	1.73676	0.345334
MSI2	1.66022	2.10488	0.34236
MNAT1	1.6737	2.11649	0.338631
LIMCH1	0.981106	1.22834	0.324226
DOCK9	1.02929	1.28219	0.316961
DNAH14	1.3778	1.71339	0.314496
FTX	3.00314	3.68056	0.29345
SDK1	1.45301	1.7157	0.239755
XRN1	1.84049	2.1679	0.236209
DIO2	0.924945	1.07701	0.219587
MPPED2	1.53401	1.68975	0.139499
RNF150	1.84138	2.01275	0.128384

## Sheet: Tab3. P-value Cluster v Cluster
Supplementary Table S4, Tab3. Cluster to Cluster Comparison P-values
Myoblast
	NES	P-value	Adjusted P-value
Cluster 2 v 1	1.97129	0.000259101	0.000777303
Cluster 2 v 3	1.90623	0.000295989	0.000887968
Cluster 2 v 4	1.3024	0.158989	0.279396
Cluster 2 v 5	1.10387	0.336171	0.336171
Cluster 2 v 6	2.04473	0.000172058	0.000357995
Cluster 2 v 7	0.85592	0.668213	0.668213
Cluster 2 v 8	2.03477	0.000333723	0.000500584
Myocyte						Myocyte
	NES	P-value	Adjusted P-value				NES	P-value	Adjusted P-value
Cluster 2 v 1	1.09413	0.373536	0.373536			Cluster 6 v 1	2.1078	0.00017059	0.000511771
Cluster 2 v 3	0.982398	0.512993	0.512993			Cluster 6 v 2	2.26383	0.000238039	0.000357058
Cluster 2 v 4	0.870419	0.612924	0.612924			Cluster 6 v 3	2.10398	0.000161629	0.000484888
Cluster 2 v 5	1.58791	0.0300781	0.0902344			Cluster 6 v 4	2.1401	0.000240385	0.000721154
Cluster 2 v 6	-2.26682	0.000238663	0.000357995			Cluster 6 v 5	2.04998	0.000629063	0.00188719
Cluster 2 v 7	1.34362	0.152549	0.457647			Cluster 6 v 7	2.06257	0.00020145	0.000604351
Cluster 2 v 8	-1.46787	0.0910183	0.0910183			Cluster 6 v 8	1.68981	0.0129964	0.0129964
PAX3-FOXO1
	NES	P-value	Adjusted P-value
Cluster 2 v 1	1.42822	0.0442299	0.0663448
Cluster 2 v 3	1.60154	0.0136171	0.0204257
Cluster 2 v 4	1.21731	0.186264	0.279396
Cluster 2 v 5	-1.32588	0.095723	0.143585
Cluster 2 v 6	1.21127	0.19799	0.19799
Cluster 2 v 7	1.03205	0.401549	0.602324
Cluster 2 v 8	1.97132	0.000322217	0.000500584

## Sheet: Tab4. Cluster 1 Dif Genes
Supplementary Table S4, Tab4. Differential Gene Expression Cluster 1 v Rest
Gene	Fold Change	L2CF
SSR4	1.44862	0.534677
IGFBP2	1.3457	0.428358
RPL10	1.33062	0.412099
BCAP31	1.31004	0.38961
FLNA	1.30747	0.386775
CD63	1.30128	0.379934
METRN	1.29809	0.376394
CST3	1.2939	0.37173
RPS4X	1.28004	0.356186
LGALS1	1.2714	0.346413
ATP6AP1	1.2616	0.335255
RPL39	1.26026	0.333717
CD81	1.2505	0.322506
IL32	1.24854	0.320244
LAGE3	1.2481	0.319732
COX7B	1.23884	0.308993
TNNT1	1.23304	0.302214
TMED9	1.23026	0.298963
SLC25A5	1.21346	0.279127
BSG	1.21172	0.277058
RPS12	1.20257	0.266121
CTSA	1.20241	0.265926
SPARC	1.20137	0.264678
RPS23	1.20122	0.264496
LGALS3BP	1.19814	0.260797
NAA10	1.19279	0.254343
COX7C	1.19066	0.251763
ISG15	1.18946	0.250307
TRA2A	0.840368	-0.250908
GGCX	0.840351	-0.250937
PCM1	0.839262	-0.252806
CDK6	0.839061	-0.253153
CAPZA1	0.838219	-0.254601
CDC42	0.837703	-0.25549
MEF2C	0.837167	-0.256412
FNDC5	0.837009	-0.256685
PRC1	0.836933	-0.256816
HNRNPH3	0.835221	-0.25977
CAV2	0.835149	-0.259894
DDX5	0.835064	-0.260041
PHLDB2	0.83426	-0.261432
HN1	0.831881	-0.265551
HES6	0.830755	-0.267505
HNRNPD	0.829285	-0.27006
RPL31	0.828336	-0.271712
AXL	0.828057	-0.272198
ENAH	0.827856	-0.272547
UBE2C	0.827455	-0.273248
TOP1	0.823883	-0.279489
MALAT1	0.823221	-0.280649
HNRNPA2B1	0.822762	-0.281453
EIF5A	0.821794	-0.283151
LRRC17	0.819815	-0.28663
UBE2E3	0.818144	-0.289573
TBL1XR1	0.817116	-0.291386
HIST1H3D	0.813194	-0.298329
MARCKSL1	0.812843	-0.298951
MT-ND5	0.811546	-0.301255
MT-ND1	0.810944	-0.302326
ASPM	0.810886	-0.302429
KPNA2	0.809071	-0.305661
CBX1	0.805572	-0.311915
CNN3	0.804122	-0.314513
KCNQ1OT1	0.802985	-0.316555
HIST2H2AC	0.802656	-0.317146
HP1BP3	0.800704	-0.320659
NUCKS1	0.79998	-0.321964
SYNC	0.799292	-0.323205
TMPO	0.7992	-0.323371
NCL	0.799053	-0.323637
TPX2	0.797778	-0.325941
HIST1H1C	0.796774	-0.327757
SOX11	0.791405	-0.337512
PPP3CA	0.789907	-0.340246
HMGB2	0.787045	-0.345482
NUSAP1	0.782747	-0.353381
HNRNPU	0.782027	-0.35471
NEB	0.780719	-0.357125
AURKA	0.780152	-0.358173
CPA5	0.767422	-0.381909
BEX1	0.75564	-0.404228
PPP1CB	0.7493	-0.416385
YWHAE	0.742613	-0.429318
MEG3	0.740632	-0.433171
MKI67	0.73744	-0.439403
TOP2A	0.729405	-0.455208
SET	0.722464	-0.469003
MYL1	0.717797	-0.478353
MTRNR2L12	0.714858	-0.484272
C1orf56	0.709361	-0.495409
CENPF	0.706013	-0.502233
S100A2	0.695412	-0.524061
CTC-425F1.4	0.683249	-0.549516
HNRNPH1	0.664914	-0.588759
TTN	0.664323	-0.590044
CTNNB1	0.657554	-0.604819
MT-ND6	0.592607	-0.754854
MYLPF	0.576958	-0.793461
FAM211A	0.302215	-1.72635

## Sheet: Tab5. Cluster 2 Dif Genes
Supplementary Table S4, Tab5. Differential Gene Expression Cluster 2 v Rest
Gene	Fold Change	L2FC
FAM211A	2.84901	1.51046
MT-ND6	1.87689	0.908342
TTN	1.68979	0.756846
HNRNPH1	1.6853	0.753008
CTNNB1	1.66945	0.739376
MKI67	1.54968	0.631968
CTC-425F1.4	1.53576	0.61895
C1orf56	1.50786	0.592502
MT-ND5	1.46619	0.552076
MT-ND1	1.43121	0.517233
MTRNR2L12	1.42467	0.510629
PEG3	1.41215	0.497892
CENPE	1.39567	0.480954
CENPF	1.37804	0.462619
MALAT1	1.36724	0.451272
GGCX	1.36293	0.446706
KCNQ1OT1	1.3597	0.443292
MACF1	1.3529	0.436051
TOP2A	1.3503	0.433278
MT-CO3	1.34725	0.43002
SOX11	1.34197	0.424351
MYH9	1.3346	0.416408
HNRNPU	1.33046	0.411926
PPP1CB	1.32749	0.4087
PDGFA	1.32231	0.403062
CALR	1.30612	0.385283
NEB	1.30512	0.38418
TPX2	1.30108	0.379706
NES	1.29959	0.378052
SFPQ	1.2983	0.376619
SET	1.29776	0.376019
CANX	1.28752	0.364596
ASPM	1.28714	0.36417
DST	1.28555	0.362385
HSPA4	1.28183	0.358204
YWHAE	1.27987	0.355995
MT-ND2	1.2775	0.353326
CCNF	1.27484	0.350321
ANLN	1.27414	0.349525
MT-CO2	1.27149	0.346523
GOLIM4	1.27083	0.345766
NCL	1.27061	0.345517
HIST2H2AC	1.26777	0.342295
SACS	1.26356	0.337492
CCND2	1.26325	0.337146
COL3A1	1.26108	0.334661
LMNB1	1.25736	0.3304
AURKA	1.25594	0.328767
SMC4	1.25259	0.324919
EIF5A	1.25118	0.323288
DICER1	1.25053	0.322544
NIN	1.24941	0.32125
HMMR	1.24843	0.320116
AXL	1.24489	0.316021
SPTBN1	1.24489	0.316018
CDC42SE1	1.24488	0.316005
ARGLU1	1.24128	0.311823
LINC00657	1.24058	0.311019
TULP4	1.23583	0.305483
CAPZA1	1.2349	0.304389
EIF4G2	1.23393	0.303261
RP11-538P18.2	1.23254	0.30163
RRBP1	1.23192	0.300907
HIST1H1C	1.23115	0.300002
CHD4	1.23047	0.299215
FMR1	1.22997	0.298619
SYNC	1.22837	0.296741
RANBP2	1.22761	0.295854
PCM1	1.22759	0.295832
DLGAP5	1.22657	0.294624
MARCKS	1.22548	0.293352
CNN3	1.22521	0.293033
MAT2A	1.22159	0.288766
NONO	1.22035	0.287299
CDK6	1.21997	0.286841
APP	1.21865	0.285289
NFIB	1.21732	0.283709
LRRC17	1.21568	0.281769
ZNF638	1.21497	0.280916
KIF4A	1.21412	0.279916
MT-CYB	1.21199	0.277378
CDC42	1.21105	0.276254
RQCD1	1.21032	0.275394
PTPRD	1.20893	0.27373
HP1BP3	1.2086	0.273341
TNRC6B	1.20825	0.272922
DDX3X	1.20791	0.272512
TMPO	1.20558	0.269731
TRIP12	1.20552	0.26965
MT-ND3	1.20471	0.268692
APLP2	1.20393	0.267747
EIF4G1	1.20383	0.26763
PHLDB2	1.203	0.266642
ATRX	1.20251	0.266052
HNRNPA3	1.20249	0.266024
SMCHD1	1.20134	0.264639
PRR11	1.2005	0.263631
KMT2A	1.1992	0.262068
ST6GALNAC2	1.19572	0.257882
TPM3	1.19553	0.257654
XRN1	1.19513	0.257173
HSP90B1	1.19507	0.257098
MAP1B	1.19447	0.256373
SGOL2	1.19435	0.256222
HIST1H1B	1.19311	0.254729
ADNP	1.19146	0.252729
PPP3CA	1.18944	0.250278
RPL35A	0.838775	-0.253645
RPS21	0.838252	-0.254545
RPL36	0.832667	-0.264189
RPS15	0.829577	-0.269552
RPS15A	0.82797	-0.27235
EEF1D	0.826427	-0.27504
RPS28	0.817902	-0.29
EIF1	0.816184	-0.293034
RPL34	0.813076	-0.298538
EIF4EBP1	0.813021	-0.298636
ACTG1	0.801466	-0.319288
MYLPF	0.792953	-0.334692
DDIT3	0.763205	-0.389858

## Sheet: Tab6. Cluster 3 Dif Genes
Supplementary Table S4, Tab6. Differential Gene Expression Cluster 3 v Rest
Gene	Fold Change	L2FC
UBE2C	1.52474	0.608567
ROMO1	1.51348	0.597873
FAM211A	1.50563	0.590364
RPL31	1.45438	0.540406
EIF2S2	1.43592	0.521975
SNRPD2	1.41288	0.498637
RPL6	1.32982	0.411232
RPS26	1.32634	0.407452
STMN1	1.32485	0.405829
TBCA	1.30765	0.386977
RPS13	1.30524	0.384319
RPL21	1.29795	0.376231
ATP5I	1.29345	0.371223
PTTG1	1.29323	0.370978
KIAA0101	1.29294	0.370652
PFDN4	1.29222	0.369853
SF3B14	1.28937	0.366663
RPS24	1.28798	0.365115
DYNLRB1	1.28662	0.363582
COX6B1	1.28594	0.362828
RSL24D1	1.28147	0.357801
SNRPD3	1.27968	0.35578
ATP5L	1.27824	0.354157
DDIT3	1.27734	0.353144
SNRPF	1.27669	0.35241
TUBA1C	1.27572	0.351313
COX4I1	1.27422	0.349618
NDUFAF2	1.27298	0.348208
UBA52	1.26672	0.341102
RPS20	1.26633	0.340656
CCDC25	1.26516	0.339318
TCEA1	1.26417	0.338194
ATP5H	1.26303	0.336883
TXN	1.26235	0.336112
RPS25	1.26023	0.333682
DSTN	1.25821	0.331373
RPL38	1.25626	0.329137
MZT1	1.25593	0.328754
CALM2	1.25476	0.327406
UQCRB	1.25431	0.326898
RPL35A	1.25297	0.325356
ODC1	1.25257	0.324886
KIAA0020	1.25033	0.322311
MYL12A	1.24897	0.320738
NDUFA11	1.24718	0.31867
HSPB11	1.24544	0.316651
KPNA2	1.24313	0.313977
UQCR10	1.24276	0.313553
EIF1	1.24195	0.312613
HSPE1	1.24097	0.311467
SAP18	1.24094	0.31143
RPL35	1.23934	0.309569
SNRPG	1.23922	0.309428
PSMB2	1.23843	0.308517
CMSS1	1.23843	0.308517
HMGN2	1.23684	0.306659
CKS1B	1.23651	0.306274
ERH	1.23568	0.305302
CCT8	1.2351	0.304631
SSBP1	1.2338	0.30311
RPL34	1.23375	0.30305
RPL22	1.23365	0.302931
RAB11A	1.23332	0.302544
RPL36A	1.23268	0.301798
METAP2	1.23234	0.301395
DNAJC8	1.23069	0.299463
COX7B	1.23019	0.298881
RPL27A	1.2289	0.297368
GNG5	1.22827	0.296632
MT2A	1.22823	0.296586
RBM8A	1.22775	0.29602
PAIP2	1.22747	0.295691
NDUFB3	1.22722	0.295395
MYL12B	1.22706	0.2952
NDUFA6	1.22703	0.295168
RPLP0	1.22648	0.29452
SRP14	1.22643	0.29447
ATPIF1	1.22633	0.294342
RPL23	1.22632	0.294333
SNRPE	1.22516	0.292974
YWHAE	1.22368	0.291232
ATP5C1	1.22292	0.290325
HSPB1	1.22278	0.290162
PBK	1.22256	0.289902
ATP5O	1.22205	0.289307
SNRPC	1.22184	0.289058
ANAPC11	1.22176	0.288962
RPL37	1.22079	0.287817
RPS28	1.22054	0.287524
TMSB4X	1.21918	0.285909
ZC3H15	1.21804	0.284558
ATP5E	1.2172	0.283562
RPS27	1.21718	0.283547
MCTS1	1.21681	0.2831
RPLP2	1.21653	0.282776
RPS11	1.21601	0.28216
MRPS21	1.21511	0.28109
ANXA1	1.21484	0.280761
TRMT112	1.21443	0.280284
FKBP1A	1.21363	0.279329
EIF3J	1.21336	0.279007
LSM3	1.2113	0.27656
PSMA7	1.21124	0.276486
POLR2L	1.21036	0.275434
RPLP1	1.21	0.275003
PSMB3	1.20982	0.274795
GLO1	1.20974	0.274691
NDUFA3	1.20916	0.274002
RPS3A	1.20901	0.273831
SARS	1.20826	0.272934
CDC20	1.20785	0.272443
PTMA	1.20768	0.272233
PRDX1	1.20563	0.269789
UBE2N	1.205	0.269039
RPS21	1.205	0.269027
RSRC2	1.2044	0.268313
NDUFB4	1.20295	0.266581
USMG5	1.20197	0.2654
SOD1	1.20164	0.265007
RPL39	1.20129	0.264588
VDAC2	1.20128	0.264575
CENPH	1.20114	0.264402
COX6C	1.20074	0.263918
RNF181	1.20062	0.263777
ATP5J2	1.20051	0.26365
SRSF3	1.19993	0.262952
HMGB2	1.19975	0.262733
SEC61G	1.19963	0.262594
NOP10	1.1994	0.262309
SNRPD1	1.19937	0.262276
RPL32	1.19918	0.262042
RPS27L	1.19898	0.261812
TMSB15A	1.19891	0.261726
NDUFA1	1.19866	0.261428
RPS29	1.19845	0.261169
RPL23A	1.1983	0.260994
RPL30	1.19803	0.26066
SDHB	1.19742	0.259934
SPC25	1.19727	0.259748
BUB3	1.19662	0.258966
HMGB1	1.1962	0.258462
CHMP5	1.19588	0.258077
HINT1	1.19486	0.256837
CFL2	1.19429	0.256149
RPA3	1.19339	0.255061
EEF1B2	1.19291	0.254482
MRPL1	1.1926	0.254104
C14orf2	1.19213	0.253546
AURKA	1.1919	0.253259
NSA2	1.19188	0.253238
RPL24	1.19161	0.252909
ACTG1	1.19155	0.252844
GADD45A	1.191	0.252177
ATP5F1	1.19057	0.251647
RPL26	1.19049	0.251559
GTF2H5	1.18933	0.250147
C19orf10	0.84069	-0.250354
ALG5	0.840677	-0.250376
INTS1	0.840592	-0.250523
SACS	0.84051	-0.250662
MTF2	0.84045	-0.250766
TXNDC12	0.839446	-0.25249
LAPTM4A	0.839262	-0.252807
PDIA3	0.839072	-0.253133
UBR4	0.838646	-0.253867
PRKDC	0.838528	-0.254069
CSNK1E	0.838494	-0.254128
FCRLA	0.838431	-0.254236
SMARCA2	0.838379	-0.254326
MYO1C	0.838346	-0.254383
PTPRF	0.838265	-0.254523
WHSC1	0.8382	-0.254634
CHID1	0.838089	-0.254825
CDC25B	0.837563	-0.255731
ROBO1	0.837524	-0.255798
B2M	0.837474	-0.255884
TMEM181	0.837222	-0.256318
SUPT6H	0.837139	-0.25646
SEC16A	0.83712	-0.256494
BRD3	0.836914	-0.256848
HIST1H4C	0.836821	-0.257009
SLC4A2	0.836207	-0.258067
CST3	0.835996	-0.258433
VCAN	0.835852	-0.258681
ENC1	0.835848	-0.258687
CYB5R1	0.835823	-0.25873
HSPA8	0.835754	-0.25885
THRAP3	0.835423	-0.259421
ATP6AP2	0.835095	-0.259988
KDM5A	0.834785	-0.260524
FAT1	0.834768	-0.260553
TTYH3	0.834647	-0.260762
TTF2	0.834573	-0.260889
SPEN	0.834471	-0.261066
ADAM10	0.834465	-0.261076
BPTF	0.834298	-0.261365
MTRNR2L1	0.833761	-0.262295
LARP1	0.833618	-0.262542
CLPTM1	0.83336	-0.262988
ZEB2	0.833359	-0.262989
ATP1B3	0.833306	-0.263081
STX16	0.833228	-0.263217
AUP1	0.8332	-0.263266
MAGT1	0.833101	-0.263437
MPRIP	0.832962	-0.263677
JSRP1	0.832679	-0.264167
ITGA1	0.832298	-0.264828
MIDN	0.831616	-0.26601
ZC3H13	0.831544	-0.266136
MLXIP	0.831428	-0.266337
PMEPA1	0.831364	-0.266449
PARM1	0.830988	-0.267101
ATP1A1	0.830978	-0.267118
FUCA2	0.830848	-0.267344
ZYX	0.830823	-0.267387
DHCR24	0.830133	-0.268586
PDGFA	0.829874	-0.269035
RHOBTB3	0.829581	-0.269545
ANK1	0.829423	-0.26982
ACIN1	0.829404	-0.269852
SDF4	0.829108	-0.270367
ERP29	0.828956	-0.270632
USP22	0.828949	-0.270645
CLTC	0.828699	-0.27108
MDK	0.828624	-0.27121
EMC3	0.828615	-0.271226
ANK2	0.828458	-0.271499
GTF3C1	0.828177	-0.271989
PABPN1	0.828063	-0.272187
LAPTM4B	0.827957	-0.272372
PRUNE2	0.827868	-0.272527
EIF4G3	0.827424	-0.273302
ERGIC3	0.827414	-0.273318
C1QTNF2	0.827176	-0.273734
LGALS3BP	0.826899	-0.274217
DAD1	0.826808	-0.274375
ZNF106	0.826567	-0.274796
GOLGB1	0.825953	-0.275868
LMAN2	0.825453	-0.276742
TMTC1	0.824918	-0.277677
IQGAP1	0.824485	-0.278435
BRD4	0.824212	-0.278912
MARCKS	0.824042	-0.27921
BAZ2A	0.82368	-0.279843
TSPAN3	0.823201	-0.280683
UTRN	0.823088	-0.280881
UBE2G2	0.823073	-0.280908
LINC00969	0.822466	-0.281971
CXXC5	0.82123	-0.284141
NOC2L	0.820963	-0.28461
COPA	0.820673	-0.285121
ACTN4	0.820088	-0.286149
LBR	0.819516	-0.287155
NR2F2	0.819467	-0.287241
HIST1H1B	0.819216	-0.287685
GTF2I	0.818951	-0.288151
TMEM259	0.818905	-0.288232
CD320	0.818722	-0.288554
LAMC1	0.818378	-0.28916
LEPRE1	0.818129	-0.2896
GRN	0.817562	-0.2906
UGCG	0.817079	-0.291452
HM13	0.816733	-0.292064
ASH1L	0.816259	-0.292902
CANX	0.816225	-0.292962
CUX1	0.815809	-0.293696
TECR	0.815718	-0.293857
KREMEN2	0.815519	-0.29421
RN7SL1	0.815478	-0.294282
HNRNPUL1	0.815148	-0.294866
SLC25A37	0.814934	-0.295245
DDOST	0.814553	-0.295919
BAZ1B	0.814455	-0.296094
ANKRD17	0.814244	-0.296467
POLR2A	0.81402	-0.296864
AKAP13	0.813663	-0.297496
ZNF704	0.813342	-0.298067
POLR2J3	0.813162	-0.298386
FAF2	0.812557	-0.299458
SNRNP200	0.811823	-0.300762
PSAP	0.811486	-0.301362
SETD5	0.811286	-0.301718
GNB2	0.811119	-0.302014
G3BP2	0.810471	-0.303168
ELN	0.810435	-0.303231
IPO9	0.809864	-0.304248
DCAF7	0.809716	-0.304513
EFNB2	0.809572	-0.304769
NAV2	0.809496	-0.304904
SEC63	0.809101	-0.305608
JAM3	0.807891	-0.307767
PRDX4	0.807028	-0.309309
PLOD3	0.806881	-0.309573
SYNE2	0.806843	-0.309641
CCND2	0.806632	-0.310017
ZKSCAN1	0.806152	-0.310877
RABL6	0.806021	-0.31111
PLXNB2	0.8057	-0.311686
CADM2	0.804012	-0.314712
SSR4	0.803826	-0.315045
PRRC2B	0.803411	-0.315789
PDIA4	0.803271	-0.316042
RANBP2	0.803189	-0.316188
SORCS1	0.803035	-0.316466
GBF1	0.802226	-0.317919
ARL6IP1	0.802215	-0.31794
MESDC2	0.802068	-0.318203
COL5A1	0.801532	-0.319167
ATP6V0B	0.80151	-0.319207
AHNAK	0.800606	-0.320836
KPNB1	0.800326	-0.32134
IGF2R	0.799508	-0.322816
PLOD1	0.798269	-0.325052
AHDC1	0.798148	-0.325272
IGF2BP1	0.797544	-0.326364
DST	0.796568	-0.328131
SEMA6A	0.795081	-0.330826
THOC2	0.79446	-0.331953
CD151	0.793817	-0.333122
NEB	0.792456	-0.335596
ACTN1	0.792177	-0.336105
PVRL2	0.792067	-0.336306
MCAM	0.791152	-0.337974
SMC4	0.790771	-0.338668
KTN1	0.789504	-0.340981
TNC	0.789314	-0.341328
ATP6AP1	0.789022	-0.341862
DARS	0.788642	-0.342557
CHPF	0.787624	-0.344422
SRRM2	0.785368	-0.348559
KANK2	0.785172	-0.348919
ARID1A	0.784603	-0.349966
XPO1	0.784147	-0.350804
FAM115A	0.783364	-0.352246
HSPA5	0.78327	-0.352418
ATRX	0.782561	-0.353725
BOD1L1	0.782256	-0.354287
EPRS	0.782113	-0.354551
TMED9	0.781999	-0.354761
FGFR1	0.780981	-0.356641
FUS	0.780769	-0.357033
SSRP1	0.780551	-0.357436
PIGT	0.779178	-0.359975
ACSL3	0.779022	-0.360263
FGFR4	0.777676	-0.362759
MAN1A2	0.77738	-0.363307
ITGB1	0.776023	-0.365829
PTPRD	0.775877	-0.366101
SPTBN1	0.775807	-0.36623
HSPH1	0.775423	-0.366945
ZNF638	0.77211	-0.373122
APLP2	0.770996	-0.375204
PNISR	0.770661	-0.375832
CTSD	0.770371	-0.376374
STC2	0.768372	-0.380123
PRKCA	0.768196	-0.380453
RCN1	0.766846	-0.38299
NCAM1	0.764776	-0.38689
ANKRD11	0.763957	-0.388436
AKAP9	0.763124	-0.39001
PLD3	0.762724	-0.390767
SFPQ	0.762219	-0.391722
CLCN5	0.760463	-0.395049
CHD4	0.76019	-0.395568
CALR	0.75935	-0.397163
CENPE	0.756714	-0.402181
TMBIM6	0.756453	-0.402677
KCNN3	0.75607	-0.403409
PDIA6	0.754208	-0.406966
PRRC2C	0.754021	-0.407324
DAG1	0.754007	-0.40735
PCDH7	0.754003	-0.407357
SMARCA4	0.753296	-0.408712
TACC1	0.753168	-0.408956
KMT2A	0.752255	-0.410706
MLEC	0.75061	-0.413864
CHD7	0.750056	-0.414931
MYH9	0.746059	-0.422638
MKI67	0.745463	-0.423792
PEG3	0.744769	-0.425134
LRPAP1	0.744714	-0.425242
OS9	0.744559	-0.425542
RTN4	0.74442	-0.425812
TGOLN2	0.744237	-0.426166
NFIB	0.744023	-0.42658
ZFP36L1	0.743269	-0.428044
CHRNA1	0.743211	-0.428156
LMAN1	0.742592	-0.429359
DBN1	0.742081	-0.430351
DYNC1H1	0.741983	-0.430542
LIMCH1	0.741378	-0.431718
ATP2B1	0.73955	-0.435281
MCM6	0.739254	-0.435859
CDK6	0.735296	-0.443602
CKAP4	0.734871	-0.444438
CD63	0.733818	-0.446506
FLNC	0.733345	-0.447437
TCF7L1	0.731587	-0.450899
MSN	0.730614	-0.452818
P4HB	0.729379	-0.455259
CDH13	0.729099	-0.455814
IGFBP2	0.728296	-0.457404
LOXL2	0.726338	-0.461286
COL4A2	0.725508	-0.462937
SERPINH1	0.725252	-0.463446
CTSA	0.724559	-0.464824
RRBP1	0.721339	-0.471251
SETD5-AS1	0.720134	-0.473662
COL3A1	0.719725	-0.474482
DICER1	0.717971	-0.478002
MIR503HG	0.716201	-0.481564
CDH15	0.715296	-0.483388
CALU	0.71376	-0.48649
MT-ND5	0.713354	-0.48731
APP	0.713125	-0.487772
PCBP2	0.709649	-0.494823
MTDH	0.70941	-0.495309
SPARC	0.709047	-0.496048
BCAP31	0.707826	-0.498534
KDELR1	0.702506	-0.509417
MAT2A	0.70195	-0.510561
EIF3A	0.701125	-0.512256
MEG3	0.698685	-0.517286
GANAB	0.695059	-0.524792
FADS1	0.687822	-0.539893
EIF4G1	0.680947	-0.554386
NEAT1	0.676455	-0.563934
HSP90B1	0.675074	-0.566881
CD81	0.670687	-0.576288
HSPG2	0.668025	-0.582027
MACF1	0.664942	-0.588701
RPN2	0.643893	-0.635108
MT-ND2	0.629368	-0.668024
BSG	0.622795	-0.68317
FN1	0.61925	-0.691406
MT-ATP6	0.615365	-0.700486
MALAT1	0.598653	-0.740209
TTN	0.594325	-0.750676
NES	0.58793	-0.766283
MT-CO1	0.581715	-0.781615
FLNA	0.581404	-0.782387
MT-ND4	0.576847	-0.793739
MT-ND1	0.575687	-0.796644
PXDN	0.571051	-0.808308
MT-CO3	0.551436	-0.858735
MT-ND3	0.537056	-0.896855
MT-CYB	0.517816	-0.949488
KCNQ1OT1	0.489434	-1.03081
MT-CO2	0.484218	-1.04627

## Sheet: Tab7. Cluster 4 Dif Genes
Supplementary Table S4, Tab7. Differential Gene Expression Cluster 4 v Rest
Gene	Fold Change	L2FC
S100A2	3.07177	1.61907
MEG3	3.04391	1.60593
CPA5	2.50955	1.32743
CAV2	2.12117	1.08486
BEX1	1.85843	0.894081
HTRA1	1.82376	0.866918
OCIAD2	1.80386	0.851086
ODC1	1.78664	0.83725
FGF8	1.76231	0.817471
LRRC17	1.73049	0.79118
CRMP1	1.72979	0.790593
JUN	1.65433	0.726244
MEST	1.6516	0.723862
UBE2E3	1.60823	0.685474
ANXA5	1.60462	0.682233
ASS1	1.59816	0.676416
PPDPF	1.59038	0.669373
HYI	1.57532	0.655648
CD151	1.56354	0.644815
DPP7	1.55914	0.640755
CDK6	1.55864	0.64029
PHLDB2	1.55165	0.633802
PPP1R14B	1.53993	0.622861
S100A16	1.5359	0.619086
MDK	1.53557	0.618771
SERINC2	1.52634	0.610079
CD82	1.51955	0.603648
ANXA1	1.51753	0.601724
P4HB	1.50402	0.588822
TMCO4	1.49092	0.576204
WIPI2	1.48832	0.573685
CAV3	1.48599	0.571421
LTBP1	1.48024	0.565831
KCNQ1OT1	1.47489	0.560605
MARCKSL1	1.45181	0.537851
NMRK1	1.44422	0.530288
ANKS6	1.43955	0.525622
ANP32B	1.43935	0.525415
HES6	1.43707	0.523126
TPGS2	1.43666	0.522719
AXL	1.43371	0.519752
PCDH7	1.43049	0.516508
SLC2A4RG	1.42728	0.513266
KREMEN2	1.42694	0.512923
ANXA3	1.42229	0.508216
MYOD1	1.41964	0.505528
YWHAQ	1.4184	0.504265
NTM	1.41406	0.499846
HMGN2	1.41406	0.499841
GPX1	1.41315	0.49891
EGFL7	1.40887	0.494534
RORA	1.40808	0.493731
ECM1	1.40334	0.488866
FGFR4	1.39533	0.480608
DMPK	1.3939	0.479131
H2AFZ	1.39217	0.477337
TYMS	1.39167	0.476818
URM1	1.38662	0.471577
MYO5B	1.38594	0.47086
OLFM1	1.38555	0.470457
ERVW-1	1.38364	0.468469
ENO3	1.37825	0.462842
BRD3	1.37772	0.462278
SNHG7	1.37615	0.460635
BAG1	1.37204	0.456323
NAALADL2	1.37123	0.455471
AC068492.1	1.36551	0.449443
NCAM1	1.36505	0.448957
GAS1	1.36357	0.447391
PRSS12	1.36261	0.446368
PAFAH1B3	1.36248	0.446238
AKAP9	1.35996	0.44356
NCS1	1.35921	0.44277
ADAMTS5	1.35851	0.442025
EPS8	1.35764	0.4411
MT-CO1	1.35522	0.438527
FNDC5	1.35376	0.436968
CDH2	1.35337	0.436556
SPATS2L	1.35106	0.43409
SNHG8	1.34939	0.432306
MAP3K7CL	1.34705	0.429801
ATP2B1	1.34699	0.429744
ATXN7L3B	1.34639	0.4291
WDR34	1.34467	0.427251
GATAD1	1.34388	0.426408
EIF4EBP1	1.34242	0.424841
AC002454.1	1.33891	0.421063
PXDN	1.33788	0.41995
CDC25B	1.3369	0.418887
SMC5	1.33587	0.417774
H3F3B	1.33282	0.41448
HIST1H4C	1.3278	0.409038
MCAM	1.3277	0.408933
PKIA	1.32704	0.408213
SEPT11	1.32656	0.407693
DRAXIN	1.32249	0.403258
TFDP2	1.3222	0.402941
RPN2	1.32176	0.402464
ST3GAL4	1.31972	0.400236
REPIN1	1.31885	0.399277
DDIT3	1.31785	0.398186
IARS	1.31676	0.396988
HNRNPD	1.31634	0.396536
SYT1	1.31604	0.396207
RAC1	1.31531	0.395408
CDC26	1.3145	0.394513
EIF5	1.31266	0.392497
FBXO17	1.3113	0.390994
AEBP1	1.31118	0.390861
PALLD	1.3111	0.390774
POLE3	1.30973	0.389269
JMJD1C	1.30924	0.388729
RUNX1	1.30583	0.384962
MAD2L2	1.30543	0.384524
DMBT1	1.30413	0.383083
SET	1.30372	0.382637
RABL6	1.30339	0.382266
DARS	1.30283	0.381646
WASF2	1.30077	0.379361
EMC10	1.30012	0.378642
SRSF10	1.29986	0.37836
CD276	1.2983	0.376628
ANK1	1.29825	0.376567
DDX27	1.298	0.376295
GAA	1.29548	0.373488
TMEM54	1.29392	0.37175
TNFRSF12A	1.29349	0.371273
FXYD6	1.29248	0.370144
TUBB4B	1.29078	0.368248
KLF5	1.28995	0.367314
EPHA4	1.28957	0.366886
HMGB2	1.28956	0.36688
LRRFIP1	1.28938	0.366678
ID1	1.28882	0.36605
WDR5	1.28603	0.362923
RABGAP1	1.28577	0.362632
PLEKHO1	1.28562	0.362469
MTCH1	1.28499	0.361757
DPM2	1.28429	0.360973
COPS6	1.28235	0.358795
FITM1	1.27972	0.355824
CENPF	1.27864	0.354606
SEMA6A	1.27705	0.352813
UGCG	1.27683	0.352565
SLC44A2	1.27592	0.351535
ITGA6	1.27449	0.349919
PRKCA	1.27425	0.349647
PDIA6	1.27365	0.348967
PHC2	1.2732	0.348459
CCT6A	1.27153	0.346563
HSPA5	1.27043	0.34532
NR1D2	1.27036	0.345235
KMT2E	1.27029	0.345155
PITX3	1.26999	0.344816
RPL7A	1.26946	0.344215
UCK1	1.26844	0.343055
PSPC1	1.26801	0.342568
SRPK2	1.26792	0.342467
H1FX	1.26745	0.341925
AGPAT2	1.26717	0.341615
FERMT3	1.26666	0.341032
SMC3	1.26639	0.340717
IFRD1	1.26566	0.339888
HNRNPUL1	1.26527	0.339445
MME	1.26521	0.339379
PSAT1	1.2638	0.337771
HNRNPH3	1.26277	0.336594
PROSC	1.26236	0.336128
TCEA2	1.26174	0.33542
GNB2	1.26121	0.334806
RBPJ	1.26007	0.333504
MT2A	1.25981	0.333202
COL4A2	1.25856	0.331771
TIMP2	1.25845	0.331647
PDAP1	1.25826	0.331436
VEGFB	1.25792	0.331037
RP11-354E11.2	1.25736	0.330398
SRP72	1.25613	0.328982
MGLL	1.2541	0.326653
ARL4A	1.25398	0.326509
PPT1	1.25362	0.326104
PCID2	1.25282	0.325183
MCM7	1.25273	0.325074
CTNNAL1	1.2527	0.325036
PTTG1IP	1.25146	0.323611
EFEMP2	1.25059	0.322605
BSG	1.25025	0.322218
NAP1L1	1.24947	0.321317
CCNY	1.24859	0.320301
COL4A1	1.24853	0.320235
PEBP1	1.24785	0.319446
ZBTB43	1.24784	0.319428
POPDC3	1.24771	0.319284
NELFB	1.24765	0.319209
MT-ATP6	1.24686	0.318294
MT-ND2	1.24664	0.318047
PSIP1	1.2457	0.316956
TSPAN33	1.24436	0.315402
MSI2	1.24377	0.314721
SRI	1.24376	0.314711
PID1	1.24368	0.314618
PPM1G	1.24323	0.31409
SURF1	1.2432	0.314058
RAB34	1.24281	0.313604
SERPINE2	1.24278	0.313574
TAF1D	1.24155	0.312146
TGFBR1	1.24009	0.310443
AL132709.5	1.23918	0.309385
ARHGAP24	1.23811	0.308136
PNKP	1.23791	0.307901
ZDHHC12	1.23754	0.307477
SPIN1	1.23733	0.307227
GLRX5	1.23727	0.307165
KRT10	1.2372	0.307077
AGTRAP	1.23646	0.30621
RP11-14N7.2	1.23582	0.305463
ARPC4	1.23574	0.305372
NBPF1	1.23549	0.305082
NFIC	1.23523	0.304778
POLD2	1.23452	0.303945
ASAP2	1.23445	0.30387
CDKN2A	1.23391	0.303241
DAG1	1.23359	0.302861
POLR2J	1.23222	0.301258
NT5C	1.23212	0.301148
PTK7	1.23191	0.300892
SPRY2	1.23062	0.299386
ERP29	1.22975	0.298363
ANKRD12	1.22949	0.298059
MTPN	1.22948	0.298053
TRA2B	1.22922	0.297747
CCDC109B	1.22833	0.296693
RUFY3	1.22817	0.296505
U2AF1	1.22684	0.294952
H2AFV	1.22679	0.294885
MAP7D1	1.22649	0.294536
PTPN12	1.22622	0.294214
N4BP2L2	1.22607	0.294041
C9orf16	1.22415	0.291779
PLAU	1.22408	0.291696
SNCA	1.22403	0.291639
RSRC2	1.2234	0.290897
USP22	1.22304	0.290474
TMPO	1.22141	0.288546
TBL1XR1	1.2212	0.288294
NAP1L4	1.22109	0.288172
BRINP1	1.22103	0.288101
IL21R	1.22089	0.287938
ARPC5L	1.21992	0.286786
OLFML2B	1.21982	0.286663
HERC5	1.21949	0.28628
HRAS	1.21941	0.286182
C19orf48	1.21924	0.285981
DTNA	1.21868	0.285318
LIMD2	1.21834	0.284915
ZNF667-AS1	1.21832	0.28489
THRAP3	1.21821	0.284766
H2AFX	1.21755	0.283977
LDHA	1.21745	0.283867
C9orf89	1.21702	0.283357
DDAH2	1.21685	0.283149
ORMDL1	1.21684	0.283142
RALA	1.2167	0.282973
LMO7	1.21645	0.282673
SRSF4	1.2161	0.282258
KIF5C	1.21578	0.281883
CALU	1.21572	0.281813
EDF1	1.21564	0.281716
MYBL2	1.21449	0.280356
RBM39	1.21438	0.280218
YTHDC1	1.21403	0.279799
LSM5	1.21397	0.27973
TMEM203	1.21354	0.279227
OSTC	1.21325	0.278873
CHCHD5	1.21312	0.278719
C9orf3	1.21298	0.278552
AQP1	1.21279	0.278332
COL1A2	1.21276	0.278291
LRPAP1	1.21232	0.277766
ITM2B	1.21225	0.277685
DNAJC8	1.21196	0.277346
NUDT14	1.21193	0.277311
HNRNPDL	1.21159	0.276905
MTDH	1.21132	0.276579
TCF7L1	1.21032	0.275392
SNTG1	1.21022	0.275265
LOXL2	1.20922	0.274076
ATP6V0B	1.2091	0.273935
FAM210B	1.20891	0.273703
ALYREF	1.20881	0.27359
FOXP2	1.20873	0.273496
C1orf122	1.20861	0.273348
PRRC2B	1.20846	0.273165
SAE1	1.20832	0.273008
MT-CO3	1.20817	0.272818
DTWD1	1.20769	0.272254
EIF4H	1.20741	0.271915
ZFP36L1	1.20706	0.271503
TMEM165	1.20671	0.271074
COL27A1	1.20629	0.27058
PRPF38A	1.20597	0.270189
RRM2	1.20554	0.269682
SCRN1	1.20514	0.269201
JUND	1.20471	0.268683
CHCHD3	1.20462	0.268579
FIP1L1	1.20461	0.268571
RAN	1.20413	0.267989
MCM6	1.20409	0.267944
FRAS1	1.20385	0.26766
TMED4	1.20325	0.266942
PLAT	1.20313	0.266788
PYURF	1.20292	0.266544
AHDC1	1.20257	0.26612
CNIH2	1.20243	0.265954
BUD31	1.20224	0.265728
PSMB7	1.20202	0.26546
SLBP	1.20195	0.265371
CPVL	1.20192	0.265336
CHD7	1.20174	0.26513
DTX3	1.20142	0.264735
PRPF38B	1.20137	0.26468
ENY2	1.2012	0.264471
MRPS28	1.20093	0.264154
POLR2I	1.20083	0.264037
PRMT2	1.20075	0.26394
PPP3CA	1.20029	0.263382
WARS	1.19997	0.262994
TADA3	1.19977	0.262756
CAPZA2	1.1992	0.262078
CEP104	1.19876	0.261543
KHDRBS1	1.19854	0.261281
CCM2	1.19824	0.260914
DLGAP1-AS1	1.19818	0.260848
LSR	1.19729	0.25977
NSMCE1	1.19662	0.25896
CAPNS1	1.1964	0.258694
TFDP1	1.19618	0.258434
PBX3	1.19588	0.258071
IL11	1.19581	0.257993
TCEA1	1.19531	0.25739
NAT14	1.19492	0.256909
UGT2B4	1.19441	0.256299
EVA1B	1.19424	0.256091
SETD5-AS1	1.19422	0.256071
ANKLE2	1.19401	0.255809
C21orf58	1.19396	0.255755
MRP63	1.19357	0.255289
RAB14	1.19292	0.254492
ARPC1B	1.19254	0.254038
MAN1B1	1.19231	0.253757
HP1BP3	1.19221	0.253643
UCP2	1.19192	0.253285
SLC3A2	1.19185	0.253197
C1QTNF2	1.19156	0.25285
BTG3	1.19142	0.252676
GADD45A	1.19127	0.252501
EZH2	1.19051	0.251577
C8orf59	1.19013	0.251114
XRCC5	1.19003	0.251003
MAPK12	1.18978	0.2507
BAZ1B	1.18959	0.250463
UBQLN1	1.18946	0.250303
MAP1LC3A	1.18927	0.250075
NOP56	1.18924	0.250038
SFTA1P	0.840516	-0.250653
ATOX1	0.840366	-0.250911
TCEB2	0.840306	-0.251013
PJA1	0.839782	-0.251913
RAB32	0.839351	-0.252654
EFNB2	0.83901	-0.25324
GLA	0.838883	-0.253458
PLK2	0.838833	-0.253545
SVIL	0.838596	-0.253952
PBX1	0.838192	-0.254647
NDUFB10	0.837876	-0.255191
SEPW1	0.837775	-0.255366
DYNLT1	0.837561	-0.255733
ACSL4	0.837403	-0.256007
HAX1	0.837064	-0.25659
CCT5	0.836358	-0.257808
TSC22D3	0.835776	-0.258812
RPL38	0.835615	-0.25909
STC2	0.834578	-0.260881
SH3BGRL	0.834199	-0.261536
CRIP2	0.833909	-0.262038
TAF1	0.833634	-0.262513
ROBO1	0.83361	-0.262555
MECP2	0.833521	-0.262709
ALDH1B1	0.833383	-0.262949
DHFR	0.833332	-0.263036
PSMA3	0.832757	-0.264033
RHOC	0.831882	-0.26555
LARP1	0.831817	-0.265662
PALMD	0.83167	-0.265917
LIMA1	0.831346	-0.266478
KMT2A	0.831315	-0.266533
LMCD1	0.83086	-0.267322
KTN1	0.830272	-0.268344
VAMP8	0.829077	-0.270421
FERMT2	0.828738	-0.271011
ZNF217	0.828401	-0.271599
RNF113A	0.827501	-0.273168
AURKAIP1	0.827477	-0.273209
MDH1	0.827458	-0.273242
MRPL52	0.826978	-0.274079
GTF2H5	0.826888	-0.274236
UTRN	0.826858	-0.274289
FAM98A	0.826207	-0.275425
ST13	0.826199	-0.275439
TNRC6B	0.825985	-0.275813
PDCD6	0.825725	-0.276267
NDUFA2	0.825613	-0.276463
CALM1	0.825463	-0.276724
KLHL41	0.824995	-0.277542
ARMCX5	0.824692	-0.278072
ZFYVE16	0.824614	-0.27821
BRWD3	0.824053	-0.279191
JPX	0.823548	-0.280075
FTL	0.823544	-0.280083
TMEM219	0.822616	-0.281709
MRPL35	0.822451	-0.281998
G3BP1	0.821706	-0.283306
CLINT1	0.820954	-0.284627
EPB41L3	0.81969	-0.286849
ARCN1	0.819574	-0.287054
CCDC80	0.819302	-0.287532
NDUFAF2	0.818914	-0.288216
ANXA2	0.818608	-0.288755
SEMA3D	0.81827	-0.289351
UBL4A	0.818078	-0.289689
BOLA3	0.818006	-0.289817
IL1RAPL2	0.817574	-0.290578
HS6ST2	0.817406	-0.290874
RPL18A	0.817386	-0.29091
R3HDM2	0.816597	-0.292303
RLIM	0.816099	-0.293184
TRAM1	0.814479	-0.296051
CARHSP1	0.814472	-0.296064
SHISA9	0.813758	-0.297329
ZNF593	0.813691	-0.297448
RPS11	0.813628	-0.297559
PRKDC	0.812628	-0.299333
TLN2	0.812501	-0.299558
FN1	0.809663	-0.304606
SUB1	0.808848	-0.306059
NKAP	0.807947	-0.307668
GGCX	0.807887	-0.307775
BCHE	0.807318	-0.308792
GDI1	0.806776	-0.30976
HPRT1	0.80559	-0.311882
TSPAN12	0.805093	-0.312772
HIGD2A	0.804733	-0.313417
RPS13	0.804719	-0.313444
UQCR10	0.802067	-0.318206
PDLIM1	0.801843	-0.318609
NDUFA6	0.801284	-0.319615
FAM127B	0.801263	-0.319652
TNNI2	0.800257	-0.321465
C1orf56	0.798953	-0.323817
EDIL3	0.79835	-0.324906
ARHGAP5	0.798135	-0.325295
PDE4DIP	0.797991	-0.325556
CFL2	0.797218	-0.326953
POLR2F	0.796439	-0.328365
CNN3	0.795346	-0.330346
KIF4A	0.795234	-0.330548
UQCRC2	0.794356	-0.332143
TBCA	0.79431	-0.332226
TMSB10	0.794264	-0.332309
PHACTR2	0.79403	-0.332734
QPRT	0.793215	-0.334217
LGALS3BP	0.792567	-0.335395
ATOH8	0.792278	-0.335921
NDUFS6	0.792116	-0.336217
UPF3B	0.791407	-0.337509
HNRNPH2	0.790488	-0.339184
ZMYND8	0.790322	-0.339488
RBM3	0.788768	-0.342326
RBMX2	0.788494	-0.342829
SHC1	0.788234	-0.343305
EMP2	0.78765	-0.344373
PA2G4	0.787477	-0.344689
UBE2A	0.786836	-0.345866
EEF1D	0.786246	-0.346947
NEDD8	0.785503	-0.348311
MRPL40	0.785335	-0.348621
IFITM2	0.782952	-0.353004
DMRT2	0.782312	-0.354184
SNRPD3	0.781907	-0.35493
CYC1	0.781497	-0.355688
NPM1	0.780162	-0.358154
TFAP2B	0.779335	-0.359685
TCEAL7	0.778631	-0.360988
VDAC1	0.778093	-0.361986
RNF181	0.777225	-0.363596
PRPS1	0.777171	-0.363695
NR2F2	0.776096	-0.365694
JTB	0.776078	-0.365727
EIF3L	0.775372	-0.367039
CTC-425F1.4	0.774824	-0.36806
TSC22D2	0.773231	-0.371029
LOXL1	0.771979	-0.373366
RPS29	0.771054	-0.375095
NSA2	0.77072	-0.375722
TIMM8A	0.770662	-0.375829
IL6ST	0.770119	-0.376847
CKS1B	0.769946	-0.377171
TMEM205	0.768464	-0.37995
SIRT2	0.767451	-0.381853
XIAP	0.766174	-0.384255
HINT1	0.765839	-0.384887
UQCRQ	0.765756	-0.385043
KLHL13	0.765092	-0.386295
CTNNB1	0.764568	-0.387284
NES	0.763816	-0.388703
CETN2	0.763368	-0.38955
PSMD10	0.762302	-0.391565
UTP14A	0.761638	-0.392822
LAMP2	0.761007	-0.394019
MST4	0.760219	-0.395514
ISG15	0.760159	-0.395627
G6PD	0.760064	-0.395807
ALDOA	0.758861	-0.398093
MSTN	0.75886	-0.398095
AIFM1	0.758491	-0.398795
PFDN4	0.757283	-0.401095
SUCLG1	0.757211	-0.401233
ENG	0.75696	-0.40171
GNB2L1	0.756598	-0.402402
DICER1	0.755433	-0.404624
RPS15A	0.75508	-0.405298
SPARC	0.753692	-0.407952
PARM1	0.7536	-0.40813
TPM1	0.753548	-0.408228
SKP1	0.753092	-0.409103
FAM3A	0.75201	-0.411177
TUBA1B	0.751502	-0.412151
LAS1L	0.751031	-0.413056
BCYRN1	0.750089	-0.414867
TPM2	0.747901	-0.419081
AMD1	0.746343	-0.42209
CST3	0.746284	-0.422203
ARMCX1	0.739903	-0.434591
ITGA1	0.739822	-0.43475
KCNN3	0.738428	-0.43747
RPL23	0.736694	-0.440863
DKC1	0.731689	-0.450698
IGBP1	0.729173	-0.455667
ARHGAP29	0.728264	-0.457467
PLS3	0.723768	-0.4664
ATP6V0E1	0.72344	-0.467055
RPS2	0.722357	-0.469215
LMO4	0.721683	-0.470564
ATP6AP1	0.721108	-0.471712
SIX1	0.720965	-0.472
EMD	0.720794	-0.472342
CD63	0.720731	-0.472466
TMEM167A	0.719462	-0.475009
MORC4	0.71649	-0.480982
NHP2	0.715691	-0.482591
ARMCX2	0.715456	-0.483066
BTF3	0.714256	-0.485486
IDH3G	0.714083	-0.485836
MIR503HG	0.713966	-0.486074
SMARCA1	0.710348	-0.493403
TCEAL8	0.710232	-0.493638
ACTC1	0.708876	-0.496394
MAP7D3	0.707727	-0.498736
PGRMC1	0.705059	-0.504185
TTN	0.703914	-0.506529
IRAK1	0.698127	-0.518438
TCEAL4	0.694621	-0.525702
VBP1	0.694118	-0.526748
YIPF6	0.693733	-0.527547
MYL1	0.692618	-0.529869
IGF2	0.679455	-0.557551
COX7C	0.674798	-0.567473
ENC1	0.674693	-0.567698
ANKRD29	0.674216	-0.568717
ARMCX6	0.672366	-0.572681
MAGT1	0.67231	-0.572802
RPS14	0.667774	-0.582568
ATP5L	0.666525	-0.585268
PHF6	0.664308	-0.590076
RPS23	0.660786	-0.597744
RPL8	0.659486	-0.600586
CHCHD10	0.659271	-0.601056
FUNDC2	0.657626	-0.604661
PEG3	0.65575	-0.608781
NFIA	0.654318	-0.611936
FAM50A	0.652928	-0.615004
RPL41	0.652846	-0.615186
PIN4	0.652795	-0.615298
THOC2	0.6471	-0.627939
HMGB3	0.645699	-0.631067
MCTS1	0.644545	-0.633646
FCRLA	0.644518	-0.633708
RPS27	0.644074	-0.634702
FAM127C	0.643446	-0.636108
HTATSF1	0.641284	-0.640964
VMA21	0.63673	-0.651246
FAM127A	0.63393	-0.657605
FHL1	0.633138	-0.659408
RPL37	0.633038	-0.659635
MYL6	0.629132	-0.668566
S100A11	0.628792	-0.669345
MYBPHL	0.621769	-0.68555
FSCN1	0.619959	-0.689755
RPS26	0.618493	-0.69317
MYL4	0.618172	-0.693921
PDZD11	0.615571	-0.700002
RPS12	0.614508	-0.702496
NGFRAP1	0.612071	-0.708229
ARMCX3	0.602203	-0.731677
PTMS	0.598014	-0.741748
MYL6B	0.597948	-0.741908
NONO	0.594576	-0.750067
NAA10	0.591692	-0.757082
BCAP31	0.578878	-0.788668
FLNA	0.578742	-0.789007
MORF4L2	0.576454	-0.794724
WBP5	0.573344	-0.802528
MGP	0.571604	-0.806912
TNNT1	0.571418	-0.807382
ATRX	0.561835	-0.831781
MSN	0.555825	-0.847297
RPL36A	0.548869	-0.865465
NDUFA1	0.546689	-0.871207
IFITM3	0.540261	-0.888272
PGK1	0.5267	-0.924948
METRN	0.522189	-0.937356
LAGE3	0.516317	-0.953672
SLC25A5	0.499369	-1.00182
FMR1	0.472066	-1.08294
FAM211A	0.428456	-1.22278
COX7B	0.428165	-1.22376
RPL39	0.422782	-1.24201
LGALS1	0.403957	-1.30773
SSR4	0.40107	-1.31807
RPS4X	0.394657	-1.34133
RPL10	0.37999	-1.39597
IGFBP2	0.328577	-1.6057
MYLPF	0.3257	-1.61838
IL32	0.317506	-1.65514
TNNI1	0.267747	-1.90106
TMSB4X	0.206122	-2.27843

## Sheet: Tab8. Cluster 5 Dif Genes
Supplementary Table S4, Tab8. Differential Gene Expression Cluster 5 v Rest
Gene	Fold Change	L2FC
MGP	2.13763	1.09601
SAMD11	2.02484	1.01781
LINC01082	1.83847	0.878507
HES6	1.83588	0.876473
SRI	1.7442	0.802569
MYOG	1.74277	0.80138
PDE4DIP	1.74137	0.80022
LMO4	1.7305	0.791189
PARP1	1.72815	0.789227
LINC01088	1.72107	0.783305
MYBPHL	1.7193	0.781819
MARCKSL1	1.70208	0.767299
HDAC5	1.69277	0.759385
NKAIN4	1.68726	0.754679
HIST1H4C	1.66811	0.738211
FSCN1	1.65188	0.724112
NFASC	1.61692	0.693247
FOXP1	1.57349	0.653964
NGFR	1.56924	0.650067
FGGY	1.54837	0.630748
H3F3A	1.53952	0.622477
ENAH	1.53686	0.619983
SATB1	1.52572	0.609487
SOX4	1.51784	0.602024
CHMP2B	1.51608	0.600347
STRA13	1.51139	0.595879
TRAF4	1.50672	0.591409
BEX1	1.50015	0.585103
CENPV	1.49974	0.58471
NME4	1.49856	0.583578
HN1	1.47883	0.564456
CIRBP	1.47854	0.56417
TROVE2	1.47701	0.562679
PBX1	1.47678	0.562458
UBE2T	1.47577	0.561464
LINC00545	1.47089	0.55669
LMCD1	1.4619	0.547845
DDIT3	1.45987	0.545838
KANK4	1.45793	0.543924
RSRC2	1.45747	0.543463
CARHSP1	1.45733	0.543324
HMGB2	1.45077	0.536821
GLI3	1.44965	0.535708
TFAP2B	1.44891	0.534968
FCRLA	1.44597	0.532041
NDUFB11	1.44471	0.530777
CCNI	1.44136	0.527426
TYMS	1.43863	0.524694
PRDX2	1.43581	0.521867
TSPAN3	1.429	0.515008
SLC25A6	1.42561	0.511581
C1orf105	1.42414	0.510089
SMAD9	1.42226	0.508181
SMC1A	1.42152	0.507435
CLCN5	1.41356	0.499328
CBX1	1.41328	0.499046
SUMO2	1.41297	0.49873
MEF2C	1.40447	0.49003
ID3	1.40014	0.485575
EZR	1.3981	0.48347
EIF1AX	1.39641	0.481718
DMRT2	1.39248	0.477656
LIMCH1	1.39058	0.475687
MZT2A	1.38759	0.472578
PEBP1	1.38657	0.47152
COPRS	1.38381	0.46865
ASS1	1.38378	0.468612
RPIA	1.37802	0.462593
SIX1	1.37757	0.462122
GPX4	1.37104	0.455273
RXRG	1.36978	0.453946
HNRNPD	1.36647	0.450452
TPR	1.35886	0.442392
PITX2	1.35855	0.442072
TP53I3	1.35782	0.441293
MDH2	1.3573	0.440745
DBI	1.3569	0.440315
TUBG1	1.35671	0.440115
TSPAN8	1.35649	0.439879
KIAA0101	1.35475	0.438026
KCNQ1OT1	1.35333	0.436518
C16orf45	1.3464	0.429106
RPL23A	1.33705	0.419051
HMGB1	1.33658	0.418549
PIPOX	1.33655	0.418513
SCRIB	1.33652	0.418484
BTG1	1.33479	0.416614
TMEM97	1.3329	0.414566
RNF187	1.33244	0.414074
PRRC2C	1.33182	0.413399
CBX3	1.33175	0.413326
PTMA	1.32764	0.408865
PFDN2	1.32694	0.408103
RBM39	1.3259	0.406971
SOX8	1.32548	0.406517
SNAI1	1.32482	0.405792
TSPAN33	1.32366	0.404538
SMTNL1	1.32276	0.403547
CCT3	1.32235	0.403104
TOMM20	1.32157	0.402249
SVIL	1.32112	0.401762
WSB1	1.32092	0.401543
DCXR	1.32028	0.400843
NENF	1.32015	0.4007
COPS6	1.31998	0.400518
LBR	1.31932	0.39979
SLBP	1.31874	0.399163
HSD17B10	1.31809	0.398447
FAM89A	1.31555	0.395662
ARID4B	1.31477	0.394816
LUC7L3	1.3143	0.394292
NR2F2	1.3126	0.392429
TMEM56	1.31193	0.39169
NUCKS1	1.31172	0.391463
LRIF1	1.3117	0.391433
TLE1	1.31165	0.391381
GSTP1	1.31109	0.390769
PSIP1	1.31098	0.390645
ABAT	1.30909	0.388564
KMT2E	1.30866	0.388096
NANOS1	1.30859	0.388012
C1orf35	1.30673	0.385965
ACTG1	1.3054	0.384494
AC002454.1	1.30482	0.383847
SNRPE	1.30435	0.383336
DNM3	1.30432	0.3833
PPFIBP1	1.3028	0.381621
RPL19	1.30239	0.381161
ELMO1	1.30187	0.380588
USP22	1.30161	0.380298
CACYBP	1.30048	0.379048
C1orf131	1.29894	0.377335
IL1RAPL2	1.29845	0.376793
HSP90AA1	1.29642	0.374537
MGST3	1.29484	0.372778
SERPINE2	1.29443	0.372318
YTHDC1	1.29387	0.371688
ALYREF	1.2934	0.371172
COX7A1	1.29328	0.37103
UBTF	1.2917	0.369275
PAICS	1.29143	0.368965
RBBP7	1.29081	0.368271
MAGED2	1.29026	0.367661
TUSC3	1.28957	0.366885
SUPT16H	1.28876	0.365986
FAM213A	1.28758	0.364667
RP11-161M6.2	1.28506	0.361832
SRRM2	1.28487	0.361626
MCM3	1.28106	0.357339
GPM6B	1.27825	0.35417
ERBB3	1.27763	0.353469
MRPS9	1.27736	0.353168
RHOBTB3	1.2764	0.352081
NT5C	1.27423	0.349627
FHL2	1.27385	0.349191
ARL6IP1	1.27382	0.349165
SMC2	1.27288	0.3481
NT5C3B	1.27131	0.346315
ZNF292	1.27009	0.344927
EMC9	1.26919	0.343908
RALGPS2	1.26904	0.343739
NASP	1.26817	0.342751
GNAI1	1.26767	0.342175
RNPS1	1.26745	0.341924
LPHN3	1.26679	0.341178
AKR1B1	1.26642	0.340757
AC068535.2	1.26607	0.340362
ALOX5AP	1.26467	0.338758
GLUL	1.26439	0.338446
GCA	1.2633	0.337202
IPO9	1.26298	0.336832
TLN2	1.26195	0.335651
CENPF	1.26187	0.33556
PRKAR1A	1.26145	0.335084
UBE2E3	1.26099	0.334553
ATP2B1	1.26064	0.334161
RAC3	1.25935	0.332678
RPS15A	1.25813	0.331285
MZT2B	1.25795	0.331071
C1GALT1	1.25737	0.330411
BLVRA	1.25685	0.329809
MFAP4	1.25674	0.329691
TRNAU1AP	1.25654	0.329459
RNF126	1.25577	0.328569
USP11	1.25562	0.328397
ATAD2	1.25513	0.327838
NDUFS2	1.25496	0.327639
TOX3	1.25464	0.327269
COA3	1.25447	0.327075
PMF1	1.25378	0.326286
RBFOX2	1.2537	0.326187
RFC2	1.25326	0.325691
SMC3	1.2529	0.325272
TSNAX	1.25269	0.325024
CBX5	1.25218	0.324443
SRSF7	1.25135	0.323484
MED16	1.25003	0.32196
FIP1L1	1.24998	0.321904
RSL1D1	1.24913	0.320926
MYL4	1.24861	0.320317
SNRPA	1.24803	0.319648
SUMF2	1.24721	0.318705
TFDP1	1.24678	0.318207
MYO1E	1.24672	0.318138
TPT1	1.24659	0.317991
HADH	1.24625	0.317591
PHB	1.24607	0.31739
H1FX	1.24605	0.317363
H1F0	1.24563	0.316873
SRP9	1.24488	0.316008
MT-ND2	1.24413	0.315142
BOD1L1	1.24375	0.314699
PSMG3	1.24365	0.314575
C12orf57	1.24356	0.31448
IARS2	1.24315	0.314002
GNG4	1.24221	0.312909
MRPS23	1.24205	0.312726
PSMD11	1.24193	0.312587
EBP	1.24176	0.312388
H3F3B	1.2398	0.310104
GTF2I	1.23897	0.309141
YPEL3	1.23831	0.308375
NAA38	1.238	0.308008
TBL1XR1	1.23759	0.307537
RAB5C	1.2374	0.307315
HMGN3	1.23727	0.307156
TTN	1.23664	0.30643
KPNB1	1.23653	0.306299
LAMC1	1.23612	0.305817
DIAPH2	1.23591	0.305568
LUC7L	1.23588	0.305533
MLF1	1.23566	0.305276
RRP15	1.23513	0.304658
SRRM1	1.23462	0.30407
ALDH1A3	1.23443	0.303841
TCF7L2	1.23393	0.303255
CCDC137	1.23352	0.30278
TMPO	1.23311	0.302302
BNIP3L	1.23254	0.301639
LINC00910	1.23242	0.301489
STMN1	1.23235	0.301413
TAGLN3	1.23144	0.300346
MCM7	1.23025	0.298952
SNRNP25	1.23	0.298661
BIRC5	1.22947	0.298035
CTNNBIP1	1.22905	0.297538
MMP3	1.22862	0.29704
WDR18	1.22831	0.29667
CCDC59	1.22801	0.296326
TSPAN7	1.22767	0.295927
SRSF11	1.22747	0.295692
EIF1B	1.22683	0.294934
FGF8	1.22654	0.294599
MRPL55	1.22622	0.29422
LAMTOR2	1.22595	0.293898
ANTXR2	1.22533	0.293167
PRKX	1.22512	0.29292
ZC3H13	1.22473	0.292463
BAZ1B	1.22434	0.292006
DDR2	1.22426	0.291908
PTPLAD1	1.2234	0.290897
BCL11A	1.2227	0.290076
NT5DC2	1.22245	0.289773
PSMD3	1.22183	0.289046
NCOA1	1.22179	0.288995
HMGXB4	1.22068	0.287687
UCHL5	1.2205	0.287473
PARM1	1.22037	0.28732
C8orf34	1.22005	0.286936
SYNE2	1.21972	0.286553
HNRNPC	1.21965	0.286463
KREMEN2	1.21943	0.286209
BTBD6	1.21923	0.285968
PXMP2	1.21913	0.285849
MT-ND4	1.21896	0.285649
FUS	1.21843	0.285021
ARHGEF2	1.21824	0.284794
NCOR1	1.21727	0.283647
EIF1	1.21703	0.283359
TXNIP	1.21671	0.28298
KLHL23	1.2167	0.282971
RFC3	1.2162	0.282377
PLS3	1.21618	0.282362
TBL1X	1.21583	0.281947
UROS	1.21566	0.281737
SERPINI1	1.21557	0.281628
RNF157	1.21535	0.28137
SEPT9	1.215	0.280952
TCF12	1.21472	0.280618
QPRT	1.21464	0.280532
ANAPC11	1.21408	0.27986
NEB	1.21398	0.279743
ATOH8	1.21359	0.279287
RARA	1.21356	0.279244
PHF3	1.21293	0.278496
MRPL23	1.21268	0.278202
OLFML2B	1.21026	0.27532
NACA	1.20993	0.274924
FAM49B	1.20984	0.274812
IGFBP2	1.20931	0.274189
SV2A	1.20911	0.273948
USP1	1.20902	0.27384
GBAS	1.20891	0.273703
PRKDC	1.20828	0.272957
THRAP3	1.20818	0.272841
NOL11	1.20789	0.272484
NUF2	1.2078	0.272387
GGH	1.20765	0.2722
KNOP1	1.20755	0.272078
IMPA2	1.20711	0.27156
HNRNPDL	1.20674	0.271113
IGF2BP1	1.20601	0.270245
CNP	1.20594	0.27016
UTP18	1.20495	0.268976
CDC73	1.20469	0.268665
SSRP1	1.20389	0.2677
ACBD6	1.20379	0.267584
ARPC1A	1.20338	0.267095
TRAPPC6A	1.20319	0.266865
MAD2L2	1.20278	0.266373
RFC1	1.20264	0.26621
FAM133B	1.20252	0.26606
EFTUD2	1.20228	0.265774
TCEAL7	1.20216	0.265624
RNASEH2A	1.20199	0.265421
HIRIP3	1.20176	0.265151
C1QTNF3	1.20144	0.264759
DTL	1.20133	0.26463
GLRX2	1.20082	0.264018
HDGF	1.20048	0.263607
RBM25	1.20022	0.263295
PALM	1.20016	0.263226
RMI2	1.1998	0.262795
PDAP1	1.1996	0.26255
ARF5	1.19943	0.262351
ATAD5	1.19922	0.262098
SRSF4	1.19916	0.262026
SART3	1.19905	0.26189
TOP2A	1.19881	0.261602
ATP8B4	1.19843	0.261143
SMARCE1	1.19804	0.260681
SUZ12	1.19772	0.260286
MRPS7	1.19725	0.259721
PHGDH	1.19715	0.259603
PKN2	1.1968	0.259186
GPATCH8	1.19655	0.258876
COPS3	1.19645	0.258762
RPL9	1.19644	0.258743
MTPN	1.19641	0.258708
PITPNM3	1.19627	0.258543
SAP18	1.19606	0.258295
SYF2	1.19598	0.258197
ETV5	1.19566	0.257812
PSMB3	1.19557	0.257704
CCBL2	1.19548	0.257589
CDC34	1.19538	0.257467
ZCRB1	1.19514	0.257179
ADIPOR1	1.19508	0.257103
CCDC43	1.19489	0.256875
TMEM205	1.19487	0.256854
HNRNPU	1.19458	0.256499
MAZ	1.19451	0.256413
OXLD1	1.1938	0.255557
SOX6	1.1935	0.255203
CRBN	1.19342	0.255099
PBK	1.19304	0.254639
CLSPN	1.19301	0.254601
TOP1	1.19288	0.254447
SUDS3	1.192	0.253389
ADI1	1.19199	0.253376
PPP4R2	1.19192	0.253285
C7orf50	1.19136	0.252615
MCM4	1.19133	0.252569
ZWINT	1.19131	0.252554
DUS1L	1.19084	0.251975
TMEM183A	1.19074	0.251854
PGF	1.19058	0.25167
GNPAT	1.19037	0.251411
KANSL1	1.19008	0.251063
FBXO17	1.1898	0.250716
THOC6	1.18978	0.250696
KCNH2	1.18969	0.250591
SRD5A3	1.18934	0.250161
ITIH5	0.840041	-0.251469
PSMA7	0.839538	-0.252332
CTSD	0.839011	-0.253238
PFDN1	0.838721	-0.253738
MME	0.838603	-0.253941
SDC2	0.838573	-0.253991
AURKA	0.838572	-0.253993
AP3S1	0.838436	-0.254227
REEP5	0.837859	-0.25522
COA4	0.837775	-0.255365
VASP	0.837512	-0.255818
OST4	0.836786	-0.257069
TTLL7	0.836584	-0.257417
CAMK2D	0.836512	-0.257542
KPNA2	0.836469	-0.257616
CCT5	0.835837	-0.258707
CACNA2D1	0.835746	-0.258863
LOXL1	0.835613	-0.259094
EPS8	0.835482	-0.259319
YIPF6	0.83541	-0.259445
TMED3	0.835277	-0.259673
THOC2	0.835145	-0.259901
CD163L1	0.835109	-0.259964
TLN1	0.83473	-0.260619
ATP1A1	0.834676	-0.260712
SNRPD2	0.83466	-0.260739
PPDPF	0.834644	-0.260767
ARCN1	0.834206	-0.261525
ZFR	0.834159	-0.261606
EPB41L3	0.833695	-0.262409
ASAP2	0.833598	-0.262576
PHF19	0.833351	-0.263005
IRS1	0.832618	-0.264273
LINC00657	0.832214	-0.264974
FAM98A	0.831994	-0.265355
SERPINB6	0.831865	-0.265579
MMP2	0.831537	-0.266148
RNF113A	0.831375	-0.266428
ADAM9	0.831279	-0.266595
SRFBP1	0.831072	-0.266955
UTP14A	0.830724	-0.267559
PHF6	0.830464	-0.26801
DEPDC1	0.830434	-0.268062
TAF7	0.830149	-0.268559
IL13RA1	0.830092	-0.268657
ADAMTS5	0.829977	-0.268858
BRINP1	0.829704	-0.269331
FITM1	0.829289	-0.270053
DCP2	0.827943	-0.272397
MRPS12	0.827911	-0.272452
TMX3	0.827781	-0.272678
DKC1	0.827594	-0.273005
ATP5E	0.826584	-0.274768
AQP1	0.826576	-0.27478
GNB2L1	0.826532	-0.274857
ARMCX3	0.825861	-0.27603
PHACTR2	0.825637	-0.276421
RTN4	0.824872	-0.277758
TTC1	0.82411	-0.279092
DYSF	0.823416	-0.280307
PDLIM2	0.823264	-0.280573
MYL6	0.822929	-0.281161
CEP112	0.822873	-0.281258
ARHGAP24	0.82205	-0.282702
RARS	0.821926	-0.28292
ITM2B	0.821891	-0.282981
CITED2	0.821694	-0.283326
FAM136A	0.82167	-0.283369
FRMD6	0.821663	-0.283381
EID1	0.821463	-0.283733
OS9	0.82124	-0.284124
SHISA9	0.820985	-0.284572
USMG5	0.819516	-0.287155
TARS	0.81912	-0.287853
DES	0.81811	-0.289633
PLEC	0.81756	-0.290603
SPTSSA	0.81743	-0.290832
SQSTM1	0.817272	-0.291113
STK17B	0.816891	-0.291784
PPME1	0.816845	-0.291866
PDCD6	0.816716	-0.292094
ARF4	0.816409	-0.292636
SCAF11	0.81631	-0.29281
SF3B5	0.815302	-0.294594
SUB1	0.815238	-0.294707
METRNL	0.815225	-0.29473
IDH3G	0.814939	-0.295237
EIF6	0.814537	-0.295947
ARL6IP5	0.81443	-0.296137
AKR1C3	0.813876	-0.297118
VAMP8	0.81376	-0.297325
AP2M1	0.813478	-0.297824
CDC20	0.813354	-0.298045
TAF9	0.813278	-0.298179
AIFM1	0.813037	-0.298606
SERPINH1	0.812904	-0.298843
HNRNPH1	0.812889	-0.29887
GNG12	0.811572	-0.301209
CARD10	0.811267	-0.301752
PSMD8	0.810429	-0.303243
CTNNB1	0.809986	-0.30403
HYOU1	0.809773	-0.30441
TMEM160	0.80967	-0.304594
TACC1	0.809239	-0.305363
FKBP1A	0.809198	-0.305436
EHD1	0.809088	-0.305632
CFL1	0.80905	-0.305699
GGCX	0.808748	-0.306237
LARP1	0.808326	-0.306991
NDUFA2	0.808186	-0.307241
RRM2	0.807759	-0.308004
RPL13A	0.807754	-0.308011
GMFG	0.807636	-0.308222
ANLN	0.807438	-0.308576
RPS12	0.807051	-0.309268
ATOX1	0.806308	-0.310597
PRMT1	0.806295	-0.310621
PDLIM7	0.806213	-0.310767
BRK1	0.80595	-0.311237
CHPF	0.805806	-0.311495
POLR2L	0.805403	-0.312217
RPL36A	0.80528	-0.312438
NIN	0.804733	-0.313417
COMT	0.804291	-0.314211
ACSL4	0.804169	-0.314429
CDV3	0.804153	-0.314458
FHL1	0.803652	-0.315357
NQO1	0.803186	-0.316194
SERPINF1	0.803032	-0.31647
NONO	0.802663	-0.317135
ANXA5	0.802254	-0.317869
KHDRBS3	0.80178	-0.318721
EIF5A	0.80135	-0.319496
HNRNPAB	0.80125	-0.319676
LEPRE1	0.800249	-0.321479
TUBB4B	0.800062	-0.321816
HS6ST2	0.799226	-0.323325
LUZP1	0.798762	-0.324163
EIF4G2	0.798756	-0.324173
CLTB	0.79812	-0.325322
ASB5	0.797987	-0.325562
TNNI1	0.797954	-0.325623
UBE2S	0.797878	-0.325761
EDIL3	0.797829	-0.325849
C1orf56	0.797276	-0.326848
DRAP1	0.79691	-0.327512
TGOLN2	0.796433	-0.328375
BTF3	0.796346	-0.328534
CHRNA1	0.796068	-0.329037
SPCS3	0.795345	-0.330347
PDLIM1	0.795187	-0.330634
LAMP2	0.795154	-0.330694
EMD	0.794505	-0.331872
ISG15	0.793331	-0.334006
KDELR1	0.793321	-0.334024
NUCB1	0.791807	-0.336779
FMR1	0.79145	-0.33743
RHOC	0.791404	-0.337514
HMMR	0.791114	-0.338043
NPM1	0.791087	-0.338092
RPS16	0.789815	-0.340414
SLC38A2	0.789043	-0.341824
ITGA4	0.788944	-0.342005
MARCH3	0.788873	-0.342134
ARPC2	0.788845	-0.342185
RPL37	0.788154	-0.343451
ATP6AP1	0.787859	-0.343991
FUCA2	0.787431	-0.344774
CD81	0.787418	-0.344799
SEC61B	0.787197	-0.345203
HLA-A	0.786818	-0.345897
JUN	0.785746	-0.347865
AURKAIP1	0.785683	-0.347981
TKT	0.78566	-0.348023
RP11-11N9.4	0.785192	-0.348882
ITGA6	0.784606	-0.34996
C12orf75	0.784533	-0.350093
RPL28	0.783911	-0.351238
AHNAK	0.78384	-0.351368
FSTL1	0.783002	-0.352912
NTM	0.78264	-0.35358
MAN2A1	0.782124	-0.354531
RP11-14N7.2	0.782081	-0.35461
COL4A2	0.781707	-0.355299
CMSS1	0.78166	-0.355387
NHP2	0.781649	-0.355407
LMO7	0.781553	-0.355584
SACS	0.781526	-0.355634
HIGD2A	0.780509	-0.357513
SCRN1	0.780334	-0.357837
PDZD11	0.779831	-0.358766
MACF1	0.779252	-0.359837
FAM50A	0.779016	-0.360275
LRRN3	0.778519	-0.361196
CSRP1	0.778427	-0.361366
PTTG1IP	0.777695	-0.362724
MDK	0.777429	-0.363216
NSA2	0.776897	-0.364205
PTBP3	0.776706	-0.364559
ELMOD1	0.776537	-0.364874
RRAS	0.775829	-0.36619
LMAN2	0.775368	-0.367047
RASSF4	0.774935	-0.367853
LGALS3BP	0.774186	-0.369248
RCAN1	0.774065	-0.369473
MIR4435-1HG	0.773599	-0.370342
MAP7D3	0.773488	-0.370549
TCEAL4	0.773448	-0.370623
CTC-425F1.4	0.772968	-0.371519
PIN4	0.771846	-0.373615
NDUFAF2	0.771766	-0.373765
TIMP1	0.771265	-0.374701
TFPI	0.770557	-0.376027
ITGB1	0.769957	-0.377149
MAGT1	0.767633	-0.381512
PMEPA1	0.767134	-0.382449
VIM	0.765896	-0.38478
SRA1	0.764338	-0.387717
ERCC1	0.763622	-0.38907
RAI14	0.763357	-0.389571
PALLD	0.762775	-0.39067
REXO2	0.762619	-0.390966
WBP5	0.76224	-0.391682
TNPO1	0.761681	-0.392742
NFIC	0.760481	-0.395016
PHLDB2	0.759351	-0.397161
HSPA4	0.759328	-0.397205
MCTS1	0.756088	-0.403374
IL6ST	0.753878	-0.407597
PVRL2	0.75326	-0.408781
CSNK1A1	0.752655	-0.40994
S100A13	0.752588	-0.410067
BAX	0.752242	-0.410731
SHC1	0.751903	-0.411382
NUAK1	0.751344	-0.412454
FN1	0.751216	-0.4127
PLK2	0.750785	-0.413529
TSPAN4	0.750482	-0.41411
FERMT3	0.749841	-0.415344
MYL12A	0.746978	-0.420862
RPS26	0.746012	-0.42273
DAB2	0.745665	-0.4234
SHISA2	0.745156	-0.424386
TPM3	0.743016	-0.428535
MINOS1	0.742104	-0.430307
PTPRF	0.742079	-0.430355
TNC	0.74142	-0.431637
PALMD	0.739969	-0.434463
MT-ND6	0.739438	-0.435498
FNDC3B	0.739401	-0.43557
GNG11	0.739047	-0.436261
VDAC1	0.739032	-0.436291
DDAH1	0.738827	-0.436691
PTTG1	0.738611	-0.437112
PPIC	0.738492	-0.437347
TXNL4A	0.737826	-0.438648
ITGA1	0.737757	-0.438783
SH3BGRL3	0.735928	-0.442364
COL5A1	0.735672	-0.442865
SSR3	0.735644	-0.44292
RND3	0.735338	-0.443521
RPL10	0.734301	-0.445556
RPS14	0.732574	-0.448954
RABAC1	0.732246	-0.4496
CCND1	0.732035	-0.450015
ELN	0.730563	-0.45292
GNG5	0.730527	-0.45299
ENG	0.730405	-0.453232
PDGFA	0.727814	-0.458359
CCNB1	0.727286	-0.459404
COL4A1	0.726375	-0.461213
HSPG2	0.724827	-0.464291
SEMA3A	0.724189	-0.465562
RPS4X	0.723945	-0.466048
CAMK2N1	0.722944	-0.468043
ATP6V0E1	0.722757	-0.468418
CAST	0.720909	-0.47211
VMA21	0.715564	-0.482848
SYTL2	0.713728	-0.486554
HINT1	0.712588	-0.48886
CALR	0.712283	-0.489479
UQCRQ	0.710793	-0.492499
LAGE3	0.70996	-0.49419
RPS23	0.709384	-0.495361
MYT1L	0.705065	-0.504171
KCNMB4	0.704906	-0.504497
PON2	0.703918	-0.506521
ETS1	0.703721	-0.506925
PRUNE2	0.701217	-0.512068
CTSA	0.700799	-0.512927
TXNRD2	0.699438	-0.515733
ACTN1	0.698998	-0.51664
PRELID1	0.697033	-0.520701
STAC3	0.695202	-0.524496
C1QTNF2	0.694994	-0.524928
TPM4	0.691965	-0.531229
FAM127C	0.690864	-0.533526
CCDC80	0.690322	-0.534659
UGCG	0.688326	-0.538835
CXXC5	0.688008	-0.539503
PGK1	0.687774	-0.539994
EIF3K	0.687179	-0.541242
COX7C	0.68488	-0.546077
TUBA1C	0.684425	-0.547036
AP2S1	0.683056	-0.549924
COX6B1	0.682079	-0.551989
TLE4	0.681496	-0.553224
RRBP1	0.679979	-0.556437
ISOC2	0.67792	-0.560814
NDUFS6	0.676593	-0.56364
RPL39	0.676352	-0.564153
VAMP5	0.673416	-0.570429
IRAK1	0.672047	-0.573366
SLC38A1	0.67031	-0.5771
SLC1A5	0.669386	-0.579089
RUNX1	0.668496	-0.581008
MSN	0.668473	-0.58106
MYL1	0.664396	-0.589885
MORF4L2	0.663972	-0.590806
TIMM8B	0.663229	-0.592421
CALM1	0.662761	-0.59344
ECM1	0.662725	-0.593517
CLIC1	0.661259	-0.596712
TPM1	0.660412	-0.598562
TMED9	0.658743	-0.602213
METRN	0.658362	-0.603046
IGFBP3	0.654509	-0.611515
MYLPF	0.650996	-0.61928
LAPTM5	0.650794	-0.619727
COL3A1	0.647072	-0.628001
IGF2	0.64642	-0.629457
NAA10	0.645625	-0.631231
NDUFA1	0.645385	-0.631768
BCYRN1	0.645023	-0.632578
BCAP31	0.640169	-0.643475
MCAM	0.640011	-0.643832
CD63	0.639385	-0.645244
MYH9	0.638254	-0.647797
MAP3K7CL	0.637813	-0.648795
SPARC	0.637212	-0.650154
CD151	0.635478	-0.654087
TNNT1	0.634241	-0.656897
RAB32	0.634222	-0.65694
SEPT11	0.630334	-0.665811
CAV3	0.629761	-0.667125
S100A16	0.626691	-0.674175
CANX	0.626193	-0.67532
PXDN	0.625925	-0.675939
PGRMC1	0.625126	-0.677782
STC2	0.624989	-0.678096
TAGLN	0.623865	-0.680695
FAM127A	0.618931	-0.692149
SLC25A5	0.616553	-0.697702
TNNT2	0.613097	-0.705812
FADS3	0.607	-0.720231
LOXL2	0.605531	-0.723728
S100A11	0.603248	-0.729178
ATP5L	0.602439	-0.731114
CYR61	0.597485	-0.743027
AXL	0.5928	-0.754382
CCDC85B	0.579029	-0.788292
MYL12B	0.57873	-0.789037
YBX3	0.570837	-0.80885
FLNA	0.559811	-0.836988
TMSB10	0.558611	-0.840083
COX7B	0.556614	-0.84525
ACTC1	0.554758	-0.850071
CAV2	0.536082	-0.899475
S100A6	0.533357	-0.906826
LINC00152	0.532096	-0.910241
FTL	0.528473	-0.9201
SSR4	0.524686	-0.930475
MT2A	0.522274	-0.937121
CST3	0.508993	-0.974281
S100A2	0.508693	-0.975134
LGALS1	0.497262	-1.00792
B2M	0.494275	-1.01662
ANK1	0.476754	-1.06868
LRRC17	0.427616	-1.22561
FAM211A	0.420721	-1.24906
ANXA1	0.404233	-1.30674
TNFRSF12A	0.402292	-1.31369
TMSB4X	0.37834	-1.40225
NNMT	0.376219	-1.41035
S100A10	0.33072	-1.59632
IL32	0.304925	-1.71347
ANXA2	0.298615	-1.74364

## Sheet: Tab9. Cluster 6 Dif Genes
Supplementary Table S4, Tab9. Differential Gene Expression Cluster 6 v Rest
Gene	Fold Change	L2FC
MYLPF	17.0469	4.09144
MYL1	8.98788	3.16798
TNNC2	5.69475	2.50963
TNNC1	4.99406	2.32021
TNNI2	4.16741	2.05915
MYL4	3.906	1.96569
MYH3	3.27932	1.7134
MEF2C	2.89884	1.53548
TTN	2.84459	1.50822
SEPW1	2.69462	1.43008
TNNI1	2.67568	1.41991
ACTC1	2.57939	1.36703
MYBPH	2.47975	1.31019
DCX	2.41571	1.27245
DES	2.33585	1.22395
MYL6B	2.14891	1.1036
TNNT3	2.12061	1.08448
TPM1	2.08827	1.06231
CASQ2	2.08462	1.05978
NEB	2.02805	1.02009
KLHL41	1.98167	0.986716
SRPK3	1.95932	0.970357
TPM2	1.95175	0.964769
TNNT2	1.94069	0.956572
FNDC5	1.92924	0.948034
CKB	1.92118	0.941993
IL32	1.84966	0.88726
MRAS	1.82576	0.868493
HSPB3	1.82411	0.867196
RASSF4	1.8126	0.858057
MACF1	1.79093	0.840709
ZNF106	1.78638	0.837038
ANKRD1	1.7656	0.820161
SMPX	1.74593	0.803993
MYOG	1.73208	0.792502
NCAM1	1.67347	0.742847
SERPINF1	1.61005	0.687105
AK1	1.55365	0.635664
MAP3K7CL	1.54999	0.632257
CTD-2545M3.8	1.54761	0.630039
NNMT	1.53836	0.621395
MAP1A	1.51996	0.60403
FILIP1	1.51941	0.603515
RBFOX1	1.51733	0.601539
CRYAB	1.51393	0.598301
CYB5R1	1.50772	0.592365
NEXN	1.50184	0.586733
PRDX6	1.50094	0.58587
MYOZ2	1.4963	0.581402
FAM211A	1.49381	0.578995
SYNPO2L	1.49282	0.578036
CAV3	1.49114	0.576418
HN1	1.4906	0.575897
CALM1	1.48686	0.572272
PRUNE2	1.4852	0.570654
STATH	1.4794	0.565007
JAK1	1.46797	0.553824
TSPAN33	1.46508	0.550982
RYR1	1.46218	0.548118
AC004562.1	1.4505	0.536554
ENO3	1.44034	0.526405
WWTR1	1.43929	0.525359
CCND1	1.42686	0.51284
LMO7	1.41561	0.501428
CDKN1A	1.40403	0.489572
BCAT1	1.40291	0.488425
NUAK1	1.39783	0.483187
FLNC	1.39725	0.482585
VASH2	1.39588	0.481174
SFTA1P	1.39518	0.48045
BIN1	1.38659	0.471538
IGF2	1.3852	0.470098
MURC	1.37351	0.457871
TMSB4X	1.36854	0.452636
MIR503HG	1.36722	0.45125
DYSF	1.36547	0.449402
PDLIM5	1.36539	0.449318
SHISA9	1.3617	0.445407
SPTBN1	1.34515	0.427771
CSRP3	1.34499	0.427595
LRRN1	1.33874	0.420881
SEMA3C	1.33315	0.414843
PPME1	1.33215	0.413762
CNN3	1.33089	0.412387
KIF1B	1.32846	0.409759
TULP4	1.32825	0.409528
TUBA1A	1.32669	0.407834
UBE2E3	1.32221	0.402956
TMEM8C	1.32214	0.40287
FRMD3	1.32173	0.402428
RND3	1.31561	0.395731
TUBB6	1.31275	0.392592
FOLR1	1.31235	0.392153
PVRL3	1.3112	0.390885
GPC1	1.31119	0.390873
VAMP5	1.31072	0.390357
HFE2	1.31031	0.38991
COBL	1.30978	0.389328
CFL2	1.3087	0.388137
SOX11	1.30731	0.386598
KREMEN2	1.30501	0.384057
AQP1	1.30442	0.383407
USP18	1.30433	0.383304
TAGLN	1.30253	0.381311
PDLIM3	1.3011	0.379733
LMNA	1.29944	0.377894
PMEPA1	1.29773	0.37599
ARHGEF6	1.29217	0.369797
UGP2	1.29193	0.36953
ARL6IP5	1.29145	0.368995
RP11-1L9.1	1.29012	0.367507
RP11-14N7.2	1.28918	0.366449
DST	1.28811	0.365259
LIMA1	1.28712	0.364144
MAP4	1.28603	0.362919
JOSD2	1.28583	0.362699
FITM1	1.28459	0.361306
HRC	1.28312	0.359656
S100A2	1.28024	0.356414
XRCC4	1.27996	0.356096
ITGA6	1.27869	0.354665
MYO10	1.27804	0.353932
LMOD3	1.2769	0.352647
ALDH1B1	1.27565	0.351235
FAM115A	1.27514	0.350652
SVIL	1.27505	0.350551
GYG1	1.27485	0.350323
MSN	1.27425	0.349647
SMYD1	1.27155	0.346587
DSEL	1.27052	0.345417
TACC1	1.27014	0.344982
SPTAN1	1.26999	0.34482
MYT1L	1.26798	0.342537
CAP2	1.26624	0.340547
ACVR2A	1.25915	0.332445
FAM127A	1.25794	0.331059
COX6A2	1.25774	0.330831
ARMCX6	1.25467	0.327308
C4orf3	1.25219	0.324452
PDLIM4	1.2518	0.324007
FRAS1	1.25124	0.323354
S100A10	1.24962	0.321495
PLEKHA4	1.2416	0.312195
MYBPC2	1.24061	0.311051
CDV3	1.23961	0.309891
PITX2	1.23923	0.309441
ABLIM1	1.23559	0.305201
RP11-358H18.3	1.23443	0.30385
MAP3K7	1.23385	0.303172
RTN4	1.2336	0.302877
CHRNA1	1.23337	0.302604
NES	1.23043	0.299162
CSRP2	1.22982	0.298447
ABL2	1.22953	0.29811
FXR1	1.22774	0.29601
MEG3	1.22685	0.29496
PALMD	1.22676	0.294859
SHD	1.22598	0.293937
RBM24	1.22553	0.293401
SSR3	1.22216	0.289435
TNNT1	1.22119	0.288285
PDLIM7	1.2197	0.286528
RARRES2	1.21807	0.284597
PTPRD	1.21757	0.284002
ARPP21	1.21671	0.28298
PHLDB2	1.21547	0.281511
DCLK1	1.21543	0.281462
RUNX1	1.21537	0.281401
ATP2B1	1.21536	0.28138
CTNNB1	1.21321	0.278835
SCN3B	1.21116	0.276393
DBN1	1.20954	0.274462
NAV3	1.20858	0.273313
AKAP6	1.20851	0.273233
TRIM55	1.2083	0.272983
ALPK3	1.20653	0.270858
IGFBP3	1.20609	0.270334
BCYRN1	1.20474	0.268726
CLSTN2	1.20431	0.268201
S100A6	1.19964	0.262604
SNX18	1.19866	0.261428
ASB5	1.19794	0.260551
AKAP9	1.19747	0.259986
COL19A1	1.19709	0.259532
HSPB2	1.19685	0.259242
DMPK	1.19574	0.257901
TMEM56	1.19565	0.257793
EHBP1L1	1.19564	0.257784
JAM3	1.19333	0.254997
RIOK3	1.19187	0.253232
SIRT2	1.1906	0.251686
RBFOX2	1.19054	0.251615
GYS1	1.18967	0.250562
SIVA1	0.840737	-0.250273
GSTO1	0.84062	-0.250474
NDC80	0.840221	-0.25116
ANKRD29	0.84007	-0.251419
PTBP1	0.839787	-0.251904
HNRNPD	0.837841	-0.255252
CPA5	0.835995	-0.258433
BAX	0.835847	-0.25869
SRSF9	0.8358	-0.258771
H3F3B	0.83425	-0.261449
ATAD2	0.833979	-0.261918
HMGN3	0.833455	-0.262823
HNRNPC	0.83192	-0.265483
TRIP6	0.831086	-0.266931
CARHSP1	0.830382	-0.268153
ACAT2	0.830093	-0.268656
IFITM2	0.828944	-0.270653
SNRPD1	0.82846	-0.271496
WDR54	0.828139	-0.272055
RRM2	0.826637	-0.274674
SNRPB	0.826379	-0.275124
MDK	0.824745	-0.27798
U2AF1	0.823765	-0.279695
CLTA	0.823059	-0.280932
CALM2	0.822883	-0.28124
SEC61B	0.822682	-0.281594
RBM39	0.822563	-0.281802
TXN	0.820662	-0.285141
CAP1	0.820438	-0.285534
FBL	0.819205	-0.287703
HSPE1	0.819118	-0.287857
COL3A1	0.816876	-0.291812
SNRPG	0.816748	-0.292037
HIST2H2AC	0.816119	-0.293148
RAB13	0.815497	-0.294248
ARPC1B	0.81512	-0.294915
MYBL2	0.813454	-0.297867
HMGN1	0.812413	-0.299715
VCAN	0.812102	-0.300268
SRSF7	0.811378	-0.301554
PAFAH1B3	0.811082	-0.30208
RSRC2	0.810235	-0.303589
ANP32B	0.808205	-0.307207
HIST1H1C	0.806583	-0.310106
TUBA1B	0.804431	-0.313959
HMGN2	0.796191	-0.328814
FBXO5	0.795718	-0.329671
FN1	0.795131	-0.330735
HMGB2	0.780573	-0.357395
ID3	0.777727	-0.362664
TPM4	0.776784	-0.364415
TUBA4A	0.775288	-0.367196
EIF4EBP1	0.773058	-0.371351
HMGB1	0.772763	-0.371902
ASS1	0.770587	-0.37597
TKT	0.76377	-0.38879
PSIP1	0.761212	-0.39363
FLNA	0.756912	-0.401803
MZT2B	0.750116	-0.414814
H2AFZ	0.741675	-0.431142
IGFBP2	0.738343	-0.437638
RAB32	0.732991	-0.448132
KIAA0101	0.730717	-0.452616
TYMS	0.719112	-0.475711
FTL	0.715525	-0.482926
PTMA	0.691396	-0.532415
HIST1H4C	0.660274	-0.598863
MT2A	0.650261	-0.620909
ACTG1	0.609649	-0.713949

## Sheet: Tab10. Cluster 7 Dif Genes
Supplementary Table S4, Tab10. Differential Gene Expression Cluster 7 v Rest
Gene	Fold Change	L2CF
XIST	3.05664	1.61194
NFASC	2.13763	1.09601
BEX1	2.06399	1.04543
KANK4	2.0623	1.04425
FSCN1	1.92928	0.948063
CKB	1.91784	0.939482
NGFR	1.88896	0.91759
ID1	1.8136	0.858856
SAMD11	1.78136	0.832983
CHMP2B	1.73809	0.797503
RPS29	1.73509	0.795013
MAP1B	1.69841	0.764184
CRMP1	1.68469	0.752481
CCT3	1.66514	0.735648
FHL2	1.65902	0.730331
MRPS9	1.63759	0.711575
IRX2	1.62488	0.700333
SRI	1.61766	0.693912
SMC3	1.60305	0.680823
PSMB5	1.60256	0.680379
TP53I3	1.59919	0.677342
LINC00545	1.5907	0.669659
PRKDC	1.59028	0.66928
MZT2A	1.58352	0.663137
PTRHD1	1.57949	0.659458
SLC25A6	1.57143	0.652082
LMO4	1.56507	0.646231
RPS24	1.5575	0.639236
TOMM20	1.53867	0.621687
ENAH	1.53783	0.620899
PTPRCAP	1.53716	0.620267
MGST3	1.52068	0.604716
OXA1L	1.50558	0.590316
MAP4K4	1.50538	0.590132
SUPT16H	1.50116	0.586082
SH3TC1	1.48155	0.567111
TPR	1.48128	0.566845
RPL4	1.47895	0.564571
EIF3A	1.47556	0.561262
RPL36AL	1.46705	0.552918
LMNA	1.46429	0.550202
FAM178A	1.46403	0.549941
BZW1	1.46343	0.549354
TPX2	1.45612	0.542129
DDX1	1.44338	0.529448
PPFIBP1	1.4393	0.525372
CAP2	1.43891	0.524977
MAP1LC3A	1.43603	0.522091
H1F0	1.43585	0.521909
EIF3L	1.4321	0.518134
MYOG	1.42158	0.507495
ABI2	1.41999	0.505877
MT-ND1	1.41949	0.505372
PLEKHG4B	1.41745	0.503297
GNB2L1	1.41717	0.503016
HDGF	1.41436	0.500153
MADD	1.41198	0.49772
EIF1AX	1.41002	0.495718
EIF3M	1.40924	0.494917
IMPA2	1.40859	0.494251
MZT2B	1.408	0.493652
PITX1	1.40798	0.493628
NKAIN4	1.39888	0.484276
HIST1H4C	1.39878	0.484167
PSMC3	1.3981	0.483468
SYNPO2L	1.39491	0.480167
SATB1	1.39466	0.479916
AC002454.1	1.39294	0.478138
KDM5B	1.39208	0.477237
RAPSN	1.39123	0.476359
TRIP6	1.38986	0.474943
MCM4	1.38712	0.47209
SLC25A3	1.38656	0.471514
PRMT5	1.38632	0.471261
PIEZO2	1.38632	0.471256
RPS25	1.38317	0.467983
TSHZ3	1.38121	0.465929
PSME1	1.38111	0.465833
FKBP3	1.37865	0.463259
DARS	1.37759	0.462144
ZNF22	1.37293	0.457261
TPT1	1.37	0.454172
ADRA2C	1.36968	0.453838
PPFIA4	1.36827	0.452357
TSPAN33	1.36472	0.448605
EEF2	1.36404	0.447884
RPS27A	1.36175	0.445462
H1FX	1.36174	0.445454
CSRP2	1.36164	0.445342
MEX3A	1.3607	0.444349
BLCAP	1.35953	0.443103
NCOA1	1.35947	0.443046
NAP1L1	1.35822	0.441716
HNRNPA3	1.35573	0.439072
SNRNP200	1.35452	0.437783
NDUFS3	1.35252	0.43565
C12orf57	1.35089	0.433912
RPL3	1.35064	0.433647
RXRG	1.35032	0.433301
SCRIB	1.34915	0.432046
H3F3A	1.34865	0.431514
FXYD6	1.3465	0.429217
TYMS	1.34629	0.42899
HN1	1.34602	0.428704
ACAT2	1.34581	0.428474
PARP1	1.34516	0.427779
RPL39L	1.34472	0.427303
IRX1	1.3446	0.427181
HES6	1.34335	0.425834
SGOL2	1.34261	0.425041
PGF	1.34193	0.424308
HSP90AA1	1.34159	0.423942
SNX17	1.34095	0.423257
AC068535.2	1.34036	0.422622
PKDCC	1.33989	0.422114
MT-ND2	1.33808	0.420167
NDN	1.33803	0.420105
NDUFS2	1.33784	0.41991
RPL24	1.33748	0.419519
MYL4	1.33699	0.418993
SNRPE	1.33618	0.418116
PITX3	1.33567	0.417561
YES1	1.33526	0.417121
VCAN	1.33403	0.415795
GTPBP6	1.33358	0.415308
SCAND1	1.3312	0.41273
ASS1	1.3276	0.408816
ABAT	1.32709	0.408266
CIB2	1.32662	0.407759
PPIG	1.32545	0.406482
SUMO1	1.32524	0.406252
DDX17	1.32459	0.405549
C11orf1	1.32225	0.402991
APEX1	1.32182	0.402531
HELLS	1.32047	0.401055
HDAC5	1.32022	0.400783
CELF1	1.32016	0.400718
GBP1	1.3195	0.399988
SMC6	1.31657	0.396787
CHD8	1.31485	0.394903
POLR2J3	1.31403	0.394001
SYNGR1	1.31344	0.393349
XRCC6	1.31155	0.391278
FNBP4	1.30989	0.389451
ST13	1.30859	0.388013
SKIL	1.30855	0.38797
VDAC2	1.306	0.385159
CAPRIN1	1.30451	0.383513
CDH4	1.30295	0.381779
ZNF714	1.30175	0.38045
ZNF667-AS1	1.3014	0.380059
DDR2	1.30069	0.379281
PNN	1.29934	0.377778
EDN3	1.29887	0.377255
HADHA	1.29871	0.377077
ACBD6	1.29656	0.374689
KLHL23	1.29557	0.373592
PDLIM4	1.295	0.372958
KRAS	1.29366	0.371462
TUG1	1.29307	0.370803
NDC80	1.2925	0.370166
RPL9	1.29221	0.369842
PCBP1	1.29186	0.369449
MT-ND4	1.29042	0.367846
RBP1	1.2898	0.367152
BIN1	1.28917	0.366442
CKAP5	1.28838	0.365554
BTG1	1.28748	0.364553
TFF3	1.28586	0.362736
ANKRD29	1.28326	0.359811
EIF5	1.28232	0.358761
DDT	1.28214	0.358556
NCAPH	1.28171	0.358066
PPM1G	1.28156	0.357898
GTF2I	1.28049	0.356698
PRPF40A	1.27946	0.355535
RPLP0	1.27865	0.354621
TBX1	1.27812	0.354026
NT5C3B	1.27768	0.353529
MN1	1.27708	0.35285
CHCHD5	1.27634	0.352014
CTNNBL1	1.27599	0.351618
UBE2T	1.27579	0.351389
IWS1	1.27505	0.350557
STMN3	1.27429	0.349693
PACSIN3	1.27413	0.349511
PRAC2	1.27392	0.349273
SUMO2	1.27365	0.348964
MAGED2	1.27293	0.348148
HNRNPA0	1.2726	0.347779
RPL31	1.27236	0.347507
THYN1	1.26922	0.343946
PROX1	1.26863	0.343272
ZKSCAN1	1.26854	0.343173
MRPS16	1.26854	0.343166
CD82	1.26663	0.340995
COPS6	1.26622	0.340528
HIP1	1.26487	0.338984
AKAP12	1.26453	0.3386
ENOSF1	1.26437	0.338413
PSMC5	1.26436	0.338402
CAD	1.26285	0.336683
ANKRD12	1.2622	0.335944
NGDN	1.26111	0.334694
LMCD1	1.2609	0.334459
RPL22L1	1.25994	0.333353
PDLIM7	1.25962	0.332988
RBFOX2	1.25915	0.332444
LRPPRC	1.25794	0.331061
SNX6	1.25712	0.330118
HS1BP3	1.25676	0.329707
CHCHD10	1.25661	0.329532
TCF7L1	1.25645	0.329349
ANP32A	1.25551	0.32827
TUBG1	1.25533	0.328066
SYTL3	1.25517	0.327881
CIRBP	1.25499	0.327677
LIMD2	1.25434	0.326933
PRRC2C	1.25423	0.326803
PRR11	1.25209	0.324336
SEPT9	1.25178	0.323982
FOXO1	1.25148	0.32363
NENF	1.25118	0.323294
ATP6V1F	1.25004	0.321975
ZFP36L1	1.24955	0.321413
PREX2	1.24771	0.319279
IPO9	1.24761	0.319173
SEMA6B	1.2467	0.31812
NSL1	1.2467	0.318112
HECTD1	1.24667	0.318083
DLG5	1.24656	0.317957
MSH2	1.24601	0.317317
BNIP3L	1.24493	0.31606
CCDC88A	1.24483	0.315946
DLGAP5	1.2445	0.315568
RPL13	1.24449	0.315552
RPL15	1.24426	0.315283
PRCC	1.24312	0.313971
UBA2	1.24302	0.313849
PAXIP1	1.24271	0.31349
ERBB3	1.24218	0.312871
RNF187	1.24216	0.312849
GEMIN6	1.24211	0.312797
ACTG1	1.24118	0.311715
CCT6A	1.24107	0.311582
UBTF	1.2404	0.310802
SLMO1	1.24011	0.310465
THOC1	1.23984	0.310155
PELP1	1.23947	0.30972
CIAO1	1.23927	0.309491
GALK1	1.23908	0.309273
AUTS2	1.2389	0.309054
OXLD1	1.2388	0.308939
PBX1	1.23808	0.30811
LUC7L3	1.2377	0.307658
CBX3	1.23689	0.306714
MXD4	1.23684	0.306663
SF3B2	1.23672	0.306516
POLD2	1.23633	0.306063
PSMC6	1.23605	0.30574
MARCKSL1	1.23578	0.305426
PDCD10	1.23575	0.305387
CEP97	1.23568	0.305305
NUP160	1.23561	0.305222
SNX9	1.23518	0.304719
HEBP2	1.23513	0.304661
FEZ2	1.23376	0.303062
EPB41L3	1.23315	0.302343
IARS2	1.23305	0.302236
SFRP1	1.23299	0.302158
PSEN2	1.23225	0.3013
HEBP1	1.23162	0.300557
IMPDH2	1.23152	0.300443
GMPR2	1.23118	0.300039
PRPF6	1.23115	0.300007
ZNF281	1.23114	0.299994
DICER1	1.23078	0.299575
ICT1	1.23078	0.299569
REV1	1.23029	0.298997
ILF2	1.22916	0.297675
GSTM3	1.22913	0.297643
MUM1	1.22883	0.297286
MYBL2	1.22841	0.296795
SPC25	1.22792	0.296221
WDR33	1.22742	0.295632
ZNF37A	1.22736	0.295554
LTA4H	1.22735	0.29555
HMGXB4	1.22646	0.2945
GAMT	1.22634	0.294359
FOXO3	1.22618	0.294167
LAMTOR2	1.22601	0.293966
DDIT4	1.22599	0.293944
ZWINT	1.22559	0.293473
PRKAR1B	1.22532	0.293158
NFU1	1.22506	0.292848
PEBP1	1.225	0.292777
SLC39A10	1.22478	0.292522
EIF2AK2	1.22434	0.291999
UBE2L6	1.22424	0.291882
SNAI1	1.22404	0.291645
PSME2	1.22348	0.290988
PCBD1	1.22312	0.290567
TSPAN15	1.22297	0.290394
CHMP4A	1.22295	0.290361
HSP90AB1	1.2224	0.289711
CD9	1.22234	0.289651
GSTP1	1.22228	0.289575
SIX1	1.22196	0.289193
SERTAD2	1.2219	0.289125
DBI	1.22168	0.288864
DNAJC2	1.22149	0.288646
RPS3	1.22143	0.288572
NPC2	1.22039	0.28734
RAN	1.22032	0.287257
MFAP4	1.22031	0.287251
TET1	1.21993	0.286804
MYBPH	1.21984	0.286695
VPS26A	1.21974	0.286578
DDX50	1.21966	0.286485
DYNC1I2	1.21929	0.286039
SPSB4	1.21891	0.285595
MTHFD1	1.21879	0.285447
ZC3H8	1.21752	0.283941
SV2A	1.21738	0.283778
LRRN1	1.21718	0.283543
POLR3A	1.21684	0.283142
RIF1	1.21613	0.282296
TOX4	1.21612	0.28229
TOP2A	1.21611	0.282269
STARD7	1.21562	0.281688
VAPA	1.21543	0.281472
PPA1	1.21519	0.281181
PHB	1.21485	0.280777
SOD2	1.21484	0.280764
GATAD1	1.21419	0.279998
UBE2G2	1.21407	0.279851
POR	1.21396	0.279722
QSER1	1.21376	0.279481
SLC35E2B	1.2137	0.279408
RPS13	1.2137	0.279406
PDCD11	1.21363	0.279325
LZTS2	1.21285	0.278399
SLC25A13	1.21276	0.278296
SEPT10	1.21241	0.277882
DHPS	1.21155	0.276855
CGGBP1	1.21117	0.276399
RBM24	1.21072	0.275868
CHST8	1.21042	0.275514
NANOS1	1.21003	0.275037
C3orf14	1.21002	0.275034
SLC2A4RG	1.20958	0.274503
CEP350	1.20945	0.27435
SAC3D1	1.20937	0.274259
RPL19	1.20914	0.273987
EIF2B4	1.20872	0.273485
SNX8	1.20829	0.272962
NES	1.20813	0.272776
FOXP1	1.20782	0.272411
BRCA1	1.20768	0.272234
PHGDH	1.20732	0.271807
MYO10	1.20729	0.27177
RABL5	1.20722	0.271686
BRAT1	1.20649	0.270813
SSB	1.20633	0.270627
PABPN1	1.20576	0.269947
OLFML2B	1.20561	0.269759
PTPRT	1.20476	0.268749
RAC3	1.20439	0.268304
GRN	1.20354	0.267283
NOP58	1.2034	0.267122
FTSJ2	1.20297	0.2666
ACIN1	1.20294	0.266569
GSTT1	1.20286	0.26647
VEGFB	1.20283	0.266429
APOE	1.20255	0.266101
MRPS35	1.20255	0.2661
RP11-561I11.3	1.20231	0.265813
SPTBN1	1.20227	0.265767
SCARA5	1.20222	0.265702
NCOR2	1.20222	0.265698
TRMT10C	1.20207	0.265526
LBR	1.2019	0.265319
ATIC	1.20169	0.26506
TMEM97	1.20151	0.264846
NUMA1	1.20075	0.263935
ORC2	1.20065	0.263819
VGLL3	1.20022	0.263297
RGS16	1.19897	0.26179
LSM14B	1.19882	0.26161
NTPCR	1.19869	0.261464
NKIRAS2	1.19836	0.261063
PLXNA2	1.19822	0.260897
ZNF32	1.19819	0.260851
RPS27	1.19815	0.260803
LDHB	1.19808	0.260728
RAB13	1.19764	0.260191
CCAR1	1.19744	0.25995
LRP3	1.19735	0.259844
DBN1	1.19716	0.259617
MTCH2	1.19681	0.259193
ANXA6	1.19673	0.259093
DPF2	1.19667	0.259029
CEP41	1.19666	0.259014
PARP2	1.1966	0.258939
YIPF4	1.19637	0.258659
HNRNPU	1.19604	0.25826
NEMF	1.19586	0.258053
PEPD	1.19565	0.2578
EIF3G	1.19518	0.257222
RPL29	1.19512	0.257155
APOA1BP	1.19502	0.257033
DES	1.19489	0.256882
CSNK1E	1.19415	0.255984
KIF1A	1.19387	0.255651
CCDC43	1.19361	0.255328
SMC1A	1.1935	0.255204
SHD	1.19346	0.255154
OLA1	1.19335	0.255021
TMEM237	1.19313	0.254756
CEBPZ	1.19297	0.254554
MLF1	1.19272	0.254252
STRADB	1.19247	0.253951
CENPF	1.19246	0.253946
BAZ1B	1.19227	0.253713
BMS1	1.19199	0.253373
RAD50	1.19184	0.253197
FAM213A	1.19162	0.252928
NCAM1	1.19072	0.251836
CCT7	1.19066	0.251756
ZNF518B	1.19038	0.25142
METAP2	1.19028	0.251304
WNK1	1.1902	0.25121
HEXIM2	1.19016	0.251155
MYBPC2	1.18952	0.250379
ZNF302	1.18943	0.250265
SCD	1.18932	0.250137
DCX	1.18932	0.250135
PHB2	1.18929	0.250104
PRKACB	0.840688	-0.250358
ORMDL2	0.840621	-0.250473
PDIA6	0.84012	-0.251333
FIS1	0.840045	-0.251461
POLR1D	0.839961	-0.251605
APOBEC3B	0.839955	-0.251616
SURF4	0.839728	-0.252005
MARS	0.839574	-0.252271
NDUFS7	0.839398	-0.252573
PTMS	0.838137	-0.254743
POPDC3	0.837464	-0.255901
DPM1	0.837421	-0.255974
FAM60A	0.83713	-0.256476
CHMP3	0.837025	-0.256657
SMC5	0.836733	-0.25716
CITED2	0.836197	-0.258085
NUBP1	0.836149	-0.258168
TMEM258	0.835871	-0.258647
BRCC3	0.835687	-0.258965
CCT2	0.835581	-0.259148
USP15	0.835206	-0.259796
PBDC1	0.835201	-0.259804
ASCC3	0.835135	-0.259919
ITGA5	0.834816	-0.26047
POLR2I	0.834653	-0.260751
ISCA1	0.834547	-0.260935
FAM229B	0.834183	-0.261563
YWHAE	0.833883	-0.262083
ROBO1	0.833878	-0.262092
VAMP8	0.83344	-0.26285
VTI1B	0.833308	-0.263079
ABRACL	0.83281	-0.263942
AZIN1	0.832067	-0.265228
PITHD1	0.831823	-0.265652
PTPRD	0.831773	-0.265738
SHISA9	0.831414	-0.26636
CAMK2N1	0.831192	-0.266746
ADAM9	0.831044	-0.267003
RAB32	0.830947	-0.267172
UCHL3	0.830708	-0.267586
HNRNPR	0.830369	-0.268175
ATP1A1	0.830293	-0.268307
LSM7	0.83029	-0.268312
SERPINF1	0.830102	-0.268639
SMARCA1	0.830089	-0.268663
SHC1	0.829894	-0.269002
MESDC2	0.829885	-0.269017
PYURF	0.829814	-0.26914
EPB41L2	0.829791	-0.26918
LARP7	0.829769	-0.269218
CTSD	0.829499	-0.269688
COPZ1	0.829435	-0.2698
USP46	0.829422	-0.269822
MYL6B	0.82934	-0.269964
MECP2	0.829126	-0.270336
DR1	0.829123	-0.270342
KDELR1	0.828977	-0.270596
ICMT	0.828429	-0.271551
DYNLRB1	0.828421	-0.271565
ETFA	0.828419	-0.271568
LAS1L	0.828414	-0.271575
CPA5	0.828396	-0.271608
ABI3BP	0.828373	-0.271647
NDUFA4	0.828348	-0.271691
DNAJB14	0.828324	-0.271733
METAP1	0.828182	-0.27198
PPP1R15A	0.827874	-0.272516
EIF3I	0.827313	-0.273495
MRPS18C	0.827266	-0.273577
CRIP2	0.826858	-0.274288
UBE2C	0.826755	-0.274468
UBL5	0.826601	-0.274737
RPN2	0.826593	-0.274751
ENOPH1	0.826266	-0.275322
RNF113A	0.826124	-0.27557
NDUFAB1	0.826055	-0.27569
MYH9	0.825845	-0.276058
PHF19	0.825365	-0.276895
GMFG	0.825337	-0.276944
RND3	0.825271	-0.27706
NKAP	0.825136	-0.277296
ARMCX5	0.823919	-0.279426
GDI1	0.823704	-0.279802
ACADVL	0.823553	-0.280067
PLOD3	0.823495	-0.280168
GNAQ	0.82335	-0.280422
IL6ST	0.823134	-0.280802
NDUFB7	0.82308	-0.280896
FNDC3B	0.823077	-0.280901
TMEM165	0.822927	-0.281164
SCARB2	0.822858	-0.281284
ANK2	0.822663	-0.281627
SSU72	0.822411	-0.282069
TXNL4A	0.822077	-0.282655
UBQLN1	0.82162	-0.283457
HNRNPH2	0.821544	-0.28359
BRK1	0.821257	-0.284094
ASB5	0.821151	-0.284281
XIAP	0.820921	-0.284685
MRPL20	0.820357	-0.285676
PTPRF	0.820247	-0.285869
SMARCA2	0.81977	-0.286709
SHISA2	0.819744	-0.286754
CYCS	0.819627	-0.286961
AIMP1	0.819337	-0.287471
TSPAN5	0.819271	-0.287587
RRAS	0.818917	-0.288211
CNOT6L	0.818392	-0.289136
HMGA1	0.818277	-0.289339
MTIF3	0.818167	-0.289533
C1orf52	0.818142	-0.289577
NAPA	0.818003	-0.289822
NID1	0.818003	-0.289822
ITGA6	0.817868	-0.290061
TAF10	0.817803	-0.290174
TMEM47	0.817782	-0.290212
SRGAP1	0.817748	-0.290271
C8orf34	0.817254	-0.291144
HSP90B1	0.817113	-0.291393
FAM3A	0.816711	-0.292102
TMSB15A	0.816244	-0.292928
DCTN2	0.81595	-0.293447
CDKN2A	0.815794	-0.293722
PARM1	0.81564	-0.293995
GNG11	0.8156	-0.294067
TCEB1	0.815388	-0.294442
TAF12	0.81528	-0.294633
HLA-A	0.815254	-0.294679
PMEPA1	0.814555	-0.295916
TSPAN31	0.814253	-0.296451
UQCR11.1	0.814205	-0.296537
ATP5I	0.814184	-0.296573
FKBP2	0.814044	-0.296822
EMC3	0.813727	-0.297384
PRR13	0.813106	-0.298484
APBB2	0.812271	-0.299966
TCF4	0.812243	-0.300016
SMS	0.812222	-0.300054
CTD-2314B22.3	0.812084	-0.300299
SWI5	0.811899	-0.300629
WEE1	0.811813	-0.30078
ZNF428	0.811739	-0.300912
HS6ST2	0.81165	-0.30107
KDELR2	0.811592	-0.301174
UBL4A	0.811547	-0.301253
TPM1	0.811529	-0.301286
COL19A1	0.811009	-0.302209
SLC7A1	0.810718	-0.302728
SDCBP	0.810588	-0.30296
COX6C	0.810267	-0.303531
RFK	0.809841	-0.304289
ODC1	0.809636	-0.304655
RP3-460G2.2	0.809611	-0.304699
PTMA	0.808858	-0.306042
TIMM8A	0.808076	-0.307437
FAM127B	0.807518	-0.308434
SEC13	0.807453	-0.30855
CCND1	0.807368	-0.308701
ELN	0.806855	-0.309618
MEG3	0.806594	-0.310085
TCEB2	0.805918	-0.311294
TMEM167A	0.80534	-0.31233
P4HB	0.805022	-0.3129
C1orf56	0.80497	-0.312994
C1QTNF2	0.804805	-0.313288
COX16	0.804628	-0.313605
CNRIP1	0.804585	-0.313683
ARF4	0.803298	-0.315993
TCEAL8	0.803205	-0.316159
BCAT1	0.802271	-0.317838
HMGA2	0.802186	-0.317991
CISD3	0.802186	-0.317992
ENO1	0.801668	-0.318923
RCAN1	0.80153	-0.319171
GNG12	0.801449	-0.319318
PFN1	0.801249	-0.319678
ARMCX1	0.800161	-0.321637
UGCG	0.800129	-0.321695
PLK2	0.800007	-0.321915
ARMCX2	0.799673	-0.322518
USO1	0.799562	-0.322718
KIF4A	0.799351	-0.3231
PRPS1	0.799203	-0.323365
DAB2	0.79724	-0.326914
DNAJB4	0.796439	-0.328365
ACTN4	0.796411	-0.328414
HPRT1	0.796401	-0.328433
ADAMTS1	0.795464	-0.330131
LPAR4	0.795384	-0.330276
SEC31A	0.795338	-0.33036
ITGAE	0.795001	-0.330971
HSPA5	0.794941	-0.331081
RRBP1	0.794134	-0.332545
LLPH	0.793754	-0.333236
C19orf10	0.793671	-0.333387
PSMD10	0.793419	-0.333846
MTRNR2L8	0.793181	-0.334279
EDIL3	0.793107	-0.334413
TMEM147	0.792622	-0.335295
CAV3	0.792385	-0.335727
UTP14A	0.791956	-0.336509
PCBP2	0.791669	-0.33703
NUCB1	0.791371	-0.337574
IGF2	0.791238	-0.337816
CENPE	0.79114	-0.337995
UBE2I	0.791083	-0.338099
RAB21	0.790857	-0.338512
NDUFB2	0.790827	-0.338565
MRPL28	0.790501	-0.339162
MORC4	0.790461	-0.339234
ACSL4	0.790152	-0.339799
CSRP1	0.789101	-0.341719
ATPIF1	0.788953	-0.341988
NSMCE1	0.787939	-0.343844
CETN2	0.787811	-0.344079
PGD	0.787294	-0.345026
LMAN1	0.787273	-0.345064
JOSD2	0.78596	-0.347472
SRM	0.785771	-0.34782
SDC2	0.785477	-0.348358
MYEOV2	0.785097	-0.349057
TPM4	0.784733	-0.349726
PRUNE2	0.784612	-0.349948
C1orf122	0.783682	-0.35166
MARCKS	0.783279	-0.352402
SPG20	0.782001	-0.354759
NTM	0.781807	-0.355115
PRELID1	0.781537	-0.355614
RP11-11N9.4	0.781413	-0.355842
GAR1	0.781341	-0.355976
LRRN3	0.781235	-0.356171
SEPW1	0.781011	-0.356586
NFIB	0.779503	-0.359373
SEC61B	0.779488	-0.359402
HSPH1	0.779226	-0.359887
TMA7	0.77887	-0.360546
ITGA1	0.778656	-0.360942
TMEM5	0.778482	-0.361265
UQCRQ	0.777812	-0.362507
NDUFS5	0.77776	-0.362603
RP11-620J15.3	0.777517	-0.363054
CANX	0.777318	-0.363423
RPL35	0.77721	-0.363624
KIF5B	0.777139	-0.363756
KLHL13	0.776903	-0.364194
NMRK1	0.775192	-0.367375
TXN	0.775034	-0.367668
GSPT1	0.774998	-0.367736
TPM3	0.77496	-0.367807
IFITM3	0.774567	-0.368538
SVIP	0.774198	-0.369225
FAM127C	0.773976	-0.369639
JAM3	0.773164	-0.371153
DDAH1	0.77284	-0.371759
GGCX	0.772103	-0.373134
CFL1	0.771883	-0.373546
CMPK1	0.771605	-0.374066
NACA	0.771026	-0.375148
MPHOSPH8	0.771	-0.375197
TIMM8B	0.770315	-0.37648
SNRPD2	0.770234	-0.376631
SERBP1	0.769792	-0.37746
CTC-425F1.4	0.769717	-0.377599
TMBIM6	0.76805	-0.380728
R3HDM2	0.767884	-0.38104
RLIM	0.767539	-0.381688
UQCRH	0.767009	-0.382685
DDOST	0.766914	-0.382863
XPOT	0.766211	-0.384187
TCEAL4	0.766177	-0.38425
ZEB2	0.765433	-0.385652
JTB	0.764989	-0.38649
DEPDC1	0.764959	-0.386545
LUZP1	0.764733	-0.386972
MYCBP	0.763947	-0.388455
ATP6AP1	0.763558	-0.389191
ALDOA	0.762485	-0.391219
MTRNR2L12	0.762459	-0.391268
SEMA3A	0.760755	-0.394496
ETS1	0.760592	-0.394805
CTNNB1	0.759986	-0.395954
HNRNPD	0.759363	-0.397139
AIFM1	0.759106	-0.397626
SPCS3	0.759036	-0.397759
UBE2M	0.758621	-0.398548
VAMP5	0.756813	-0.401991
ARMCX6	0.756769	-0.402076
PRMT1	0.755631	-0.404246
CCNI	0.754812	-0.40581
TUBA1C	0.753713	-0.407913
EMD	0.753521	-0.40828
RPL34	0.752881	-0.409507
CISD2	0.751959	-0.411274
ADAMTS5	0.75134	-0.412463
PALMD	0.751204	-0.412723
JAK1	0.750987	-0.41314
LGALS1	0.7507	-0.413692
CAMTA1	0.749471	-0.416056
PFDN4	0.748905	-0.417145
PEG3	0.748605	-0.417724
RUNX1	0.748475	-0.417974
CCDC25	0.748012	-0.418866
SSR3	0.745983	-0.422786
FTL	0.74583	-0.423081
ZMYND8	0.745499	-0.423722
SPARC	0.744711	-0.425248
MT1X	0.744539	-0.425581
CHID1	0.744427	-0.425798
ELMOD1	0.744222	-0.426195
FADS3	0.744101	-0.42643
TNC	0.743832	-0.426952
SBDS	0.742825	-0.428905
TMEM50A	0.741737	-0.431021
SLC1A5	0.741652	-0.431185
COMT	0.741611	-0.431266
EIF3K	0.741494	-0.431494
UBE2S	0.741366	-0.431741
ARL6IP5	0.741044	-0.432369
MAP7D3	0.740758	-0.432925
ITM2B	0.740492	-0.433445
FGGY	0.740243	-0.433929
S100A2	0.739513	-0.435353
ISOC2	0.737794	-0.438711
KMT2A	0.73778	-0.438738
TGOLN2	0.737527	-0.439232
PFDN5	0.735714	-0.442783
PA2G4	0.73462	-0.44493
TLE4	0.734471	-0.445222
PPDPF	0.734402	-0.445357
LOXL2	0.734374	-0.445413
BAX	0.733445	-0.447239
LINC00152	0.732013	-0.450058
ITGB1	0.731753	-0.450571
HSPG2	0.731207	-0.451648
CCDC140	0.731014	-0.452029
MCAM	0.73051	-0.453024
UFM1	0.729917	-0.454196
YBX1	0.729858	-0.454313
MAGT1	0.729728	-0.45457
UBE2D3	0.729004	-0.456001
CYR61	0.728853	-0.456301
ANAPC11	0.728724	-0.456556
TMED9	0.728705	-0.456593
PTP4A2	0.727135	-0.459706
TSC22D3	0.726547	-0.460872
TSPAN4	0.726114	-0.461733
CTSA	0.72574	-0.462476
HMGB3	0.725545	-0.462863
ISG15	0.725362	-0.463226
TUBA1B	0.725234	-0.463482
CAND1	0.725086	-0.463775
CCDC80	0.724969	-0.464009
LAPTM4B	0.724021	-0.465897
HNRNPA1	0.723871	-0.466196
COX7A2	0.72307	-0.467793
ATP5G2	0.721909	-0.470111
EMP3	0.721478	-0.470972
IDH3G	0.721288	-0.471352
POLR2L	0.720301	-0.473328
LSM4	0.719357	-0.47522
TMBIM4.1	0.718445	-0.47705
SACS	0.7175	-0.478949
LAMP2	0.717424	-0.479102
EIF5A	0.716343	-0.481277
HMGN1	0.714565	-0.484863
KCNMB4	0.711799	-0.490459
TACC1	0.711171	-0.491732
CALU	0.710082	-0.493943
RAP1B	0.709556	-0.495012
SAP18	0.709081	-0.495977
PHPT1	0.708613	-0.49693
PRDX4	0.708354	-0.497457
STAC3	0.708236	-0.497699
PRDX1	0.706949	-0.500322
ATP5J	0.706903	-0.500416
OS9	0.706649	-0.500935
ATRX	0.705669	-0.502937
FHL1	0.703605	-0.507162
EIF4E	0.702252	-0.50994
CNPY2	0.702192	-0.510062
ATP1B3	0.701626	-0.511226
UPF3B	0.699505	-0.515594
CCDC109B	0.699104	-0.516421
PHF6	0.698616	-0.517428
SH3BGRL3	0.697984	-0.518734
NDUFA3	0.693856	-0.527292
CD81	0.692721	-0.529654
HTATSF1	0.69189	-0.531385
PIN4	0.691719	-0.531743
ATP5B	0.690152	-0.535014
ATP6V0B	0.690111	-0.5351
RABAC1	0.690017	-0.535296
PARK7	0.689995	-0.535343
IGFBP3	0.689199	-0.537008
MT-ND6	0.688806	-0.53783
HMGN2	0.688347	-0.538792
MRP63	0.688205	-0.53909
LUZP2	0.687353	-0.540877
CAMK2D	0.684045	-0.547837
S100A16	0.683615	-0.548744
VBP1	0.682003	-0.55215
EMP2	0.68112	-0.554019
ANXA5	0.680642	-0.555031
YIPF6	0.679699	-0.557033
TTLL7	0.679482	-0.557493
HMGB1	0.678937	-0.558651
AP2S1	0.678369	-0.559858
PSAT1	0.67625	-0.56437
MAP3K7CL	0.673975	-0.569233
BLOC1S1	0.672897	-0.571542
MYL1	0.671892	-0.573699
G3BP2	0.670546	-0.576591
ARMCX3	0.668563	-0.580864
PTGES3	0.668421	-0.581171
YBX3	0.667533	-0.583089
NGFRAP1	0.66706	-0.584112
RPL21	0.665851	-0.586728
PDZD11	0.665699	-0.587058
AXL	0.665642	-0.587182
STUB1	0.665412	-0.58768
MYBPHL	0.664485	-0.589692
VMA21	0.664239	-0.590225
LAPTM5	0.663518	-0.591793
PABPC4	0.663051	-0.592808
MYLPF	0.661501	-0.596185
COX6B1	0.6607	-0.597932
NAA10	0.660395	-0.598599
ETFB	0.659472	-0.600617
DKC1	0.658242	-0.603309
CDC42	0.657476	-0.60499
SHMT2	0.656914	-0.606223
MCTS1	0.650867	-0.619566
C16orf13	0.649976	-0.621542
THOC2	0.64863	-0.624532
OSTC	0.645863	-0.630699
B2M	0.645431	-0.631665
RPL41	0.643261	-0.636523
GOLM1	0.64179	-0.639828
MINOS1	0.633769	-0.65797
FUNDC2	0.629722	-0.667214
POMP	0.629444	-0.66785
MGP	0.628232	-0.67063
FAM127A	0.628182	-0.670746
CAV2	0.626831	-0.673851
CD151	0.626655	-0.674256
CDK4	0.623706	-0.681061
FKBP1A	0.623674	-0.681137
S100A11	0.622364	-0.684168
NONO	0.622177	-0.684602
FAM50A	0.616619	-0.697549
PGRMC1	0.616463	-0.697914
RPL36A	0.615818	-0.699423
RP11-14N7.2	0.612501	-0.707217
IRAK1	0.60928	-0.714824
MYL6	0.600105	-0.736713
ANXA2	0.599366	-0.73849
FLNA	0.598361	-0.740912
GNG5	0.597488	-0.743017
BSG	0.597137	-0.743866
CALR	0.590285	-0.760517
PGK1	0.589655	-0.762057
H2AFZ	0.58656	-0.76965
SLC38A1	0.581694	-0.781668
AMD1	0.581213	-0.782861
TMSB10	0.579514	-0.787085
MSN	0.578233	-0.790278
ATP5L	0.572016	-0.805873
RPL10	0.571936	-0.806075
LAGE3	0.569973	-0.811034
WBP5	0.562669	-0.829641
TNFRSF12A	0.561632	-0.832303
FMR1	0.561392	-0.83292
NDUFA1	0.548217	-0.86718
BCAP31	0.547401	-0.86933
ANK1	0.542602	-0.882034
RPS26	0.541194	-0.885783
TMSB4X	0.540873	-0.886638
SEPT11	0.537296	-0.896212
BCYRN1	0.537058	-0.896849
RPL39	0.532359	-0.909527
MORF4L2	0.524736	-0.930337
SLC25A5	0.524016	-0.932317
COL3A1	0.506076	-0.982574
MT2A	0.492698	-1.02123
IL32	0.486079	-1.04074
LRRC17	0.474266	-1.07623
CST3	0.467626	-1.09657
ANXA1	0.446774	-1.16238
COX7B	0.442711	-1.17556
FAM211A	0.421772	-1.24547
METRN	0.41861	-1.25632
NNMT	0.401194	-1.31763
CD63	0.400317	-1.32079
SSR4	0.395711	-1.33748
S100A10	0.389517	-1.36024
IGFBP2	0.376931	-1.40763

[truncated: 1 more sheets: Tab11. Cluster 8 Dif Genes]
