# Supplementary material for: KDM3B inhibitors disrupt PAX3-FOXO1 oncogenic activity in fusion positive rhabdomyosarcoma.
Source: Research Square preprint supplement (doi:10.21203/rs.3.rs-2298627/v1), 2022-11-29
Supplement: Supplementary file 6 [file bcf7ba9e0ac7b0a545c52e04.xlsx]

## Sheet: Tab1. Antibody Table
Supplementary Table S7. Antibody Table
Antibody Target	Source	Cat#	Used for	Dilution/Conc Used
PAX3-FOXO1	In House	N/A	ChIP	0.1 µg/µL
FOXO1	Cell Signaling	2880	Western	1:2000
H3K9me2	Abcam	ab1220	Western, ChIP	1:5000, 0.03 µg/µL
H3K4me3	Active motif	39159	Western, ChIP	1:4000, 0.03 µg/µL
H3K27me3	Active motif	39155	Western, ChIP	1:4000, 0.03 µg/µL
H3K27ac	Active motif	39133	ChIP	1:30
Total RNA Pol2	Millipore	05-623	ChIP	1:26
RNA Pol2 Ser5	Cell Signaling	13523	ChIP	1:43
RNA Pol2 Ser2	Cell Signaling	13499	ChIP	1:43
H3 Total Histone	Cell Signaling	9715	Western	1:5000
MYOG	Invitrogen	MA1-41042	Western	1:500
Total PARP	Cell Signaling	9542	Western	1:1000
KDM1A	Cell Signaling	2184S	Western	1:1000
KDM3B	Cell Signaling	5377T	Western	1:1000
KDM4B	Cell Signaling	8639S	Western	1:1000
KDM5A	Cell Signaling	3876T	Western	1:1000
Tubulin	Abcam	ab7291	Western	1:5000
Actin-HRP	Santa Cruz	sc-47778	Western	1:10000
GAPDH-HRP	Santa Cruz	sc-47724	Western	1:10000
anti-mouse-HRP	Santa Cruz	sc-2005	Western	1:5000
anti-rabbit-HRP	Santa Cruz	sc-2004	Western	1:5000
Ki67	Invitrogen	MA5-14520	Flow Cytometry	1:150
pH3	Biolegend	650802	Flow Cytometry	1:40
anti-rabbit-Alexa488	Invitrogen	A-11034	Flow Cytometry	1:200
