# Supplementary material for: KDM3B inhibitors disrupt PAX3-FOXO1 oncogenic activity in fusion positive rhabdomyosarcoma.
Source: Research Square preprint supplement (doi:10.21203/rs.3.rs-2298627/v1), 2022-11-29
Supplement: Supplementary file 7 [file e6495e05aaa01f96abcdc677.xlsx]

## Sheet: Tab1. PFI-90 6hr GSEA
Supplementary Table S3, Tab1. GSEA of PFI-90 at 1 µM vs DMSO at 6 hours
Upregulated at 6 hours (FDR < 0.05)					Downregulated at 6 hours (FDR < 0.05)
Gene Set	NES	NOM p-val	FDR q-val		Gene Set	NES	NOM p-val	FDR q-val
HALLMARK_MITOTIC_SPINDLE	2.20228	0	0		REACTOME_TRANSLATION	-3.1842	0	0
PAX3FOXO1_INTERACTORS_NUCLEAR	2.12051	0	0.000391		KEGG_RIBOSOME	-3.14785	0	0
RMS_CORRELATE_WITH_FGFR4	2.03614	0	0.000811		HALLMARK_MYC_TARGETS_V1	-3.13074	0	0
EGLN3_INTERACTORS	1.93582	0	0.0060003		HALLMARK_OXIDATIVE_PHOSPHORYLATION	-3.00002	0	0
PRC2_EED_UP.V1_DN	1.87165	0	0.0126276		MOOTHA_VOXPHOS	-2.88822	0	0
BRD4_INTERACTORS_BIOGRID	1.85324	0	0.0130502		WONG_MITOCHONDRIA_GENE_MODULE	-2.86699	0	0
HIF1AN_INTERACTORS_BIOGRID	1.83198	0	0.0141399		HSIAO_HOUSEKEEPING_GENES	-2.84503	0	0
BILD_HRAS_ONCOGENIC_SIGNATURE	1.76175	0	0.0285962		REACTOME_RESPIRATORY_ELECTRON_TRANSPORT_ATP_SYNTHESIS	-2.74128	0	0
EBAUER_TARGETS_OF_PAX3_FOXO1_FUSION_DN	1.75441	0.0028531	0.028344		ROME_INSULIN_TARGETS_IN_MUSCLE_UP	-2.55745	0	0
SHEN_SMARCA2_TARGETS_DN	1.75383	0	0.025749		HALLMARK_MTORC1_SIGNALING	-2.44414	0	0
HALLMARK_MYOGENESIS	1.74547	0	0.026168		KEGG_PROTEASOME	-2.35464	0	0
WANG_KDM3B_UP	1.74444	0	0.024122		REACTOME_P53_INDEPENDENT_G1_S_DNA_DAMAGE_CHECKPOINT	-2.3311	0	0
HALLMARK_WNT_BETA_CATENIN_SIGNALING	1.73825	0.002805	0.0244738		MITOCHONDRIA_PROTEOME_V1	-2.28835	0	0
SCIBETTA_KDM5B_TARGETS_UP	1.67056	0.0094192	0.0462036		BENPORATH_PROLIFERATION	-2.2831	0	0
CORRELATED_0.5_WITH_TFAP2B_PAX_FOXO1_EXPRESSION_SIGNATURE_UP	1.66982	0	0.0434433		SHEN_SMARCA2_TARGETS_UP	-2.23987	0	0
RAS_GTPASE_ACTIVATOR_ACTIVITY	1.66789	0.0061162	0.0415746		MYCN_INDUCTION_6H_UP	-2.23687	0	0
RH4_PLX1_UP	1.6512	0	0.0474769		DEPMAP_COMMON_ESSENTIALS	-2.19352	0	0
					BAE_BRCA1_TARGETS_UP	-2.19051	0	0
					REACTOME_P53_DEPENDENT_G1_DNA_DAMAGE_RESPONSE	-2.17393	0	8.3e-05
					PEART_HDAC_PROLIFERATION_CLUSTER_UP	-2.09406	0	0.000266
					GO_NEGATIVE_REGULATION_OF_RELEASE_OF_CYTOCHROME_C_FROM_MITOCHONDRIA	-2.05459	0	0.00033
					UDAYAKUMAR_MED1_TARGETS_UP	-2.02725	0	0.000488
					NS132_SKELETAL_MUSCLE_DOWN	-1.99073	0	0.000902
					REACTOME_REGULATION_OF_MRNA_STABILITY_BY_PROTEINS_THAT_BIND_AU_RICH_ELEMENTS	-1.97564	0	0.00109172
					KEGG_GLYCOLYSIS_GLUCONEOGENESIS	-1.90853	0	0.0023738
					WANG_SMARCE1_TARGETS_DN	-1.85585	0	0.0045448
					HIF1AN_METABOLIC	-1.85481	0.005277	0.004448
					HALLMARK_ANDROGEN_RESPONSE	-1.84914	0	0.0045293
					REACTOME_POST_TRANSLATIONAL_PROTEIN_MODIFICATION	-1.80008	0	0.0073294
					RH4_PLX1_DOWN	-1.76866	0	0.0095058
					JMJD6_INTERACTORS	-1.75345	0	0.0101766
					MITOCHONDRIA_PROTEOME_V2	-1.74077	0.0032468	0.0108289
					BASAKI_YBX1_TARGETS_UP	-1.73186	0	0.011177
					KANG_DOXORUBICIN_RESISTANCE_UP	-1.72105	0	0.011729
					REN_BOUND_BY_E2F	-1.72098	0.0040161	0.0113939
					PAL_PRMT5_TARGETS_UP	-1.70791	0	0.0124032
					CONCANNON_APOPTOSIS_BY_EPOXOMICIN_DN	-1.67047	0	0.0168924
					HALLMARK_GLYCOLYSIS	-1.65847	0	0.017966
					MARTINEZ_TP53_TARGETS_UP	-1.59029	0	0.0302932
					JMJD8_INTERACTORS	-1.58028	0.0036364	0.0314739
					ROSTY_CERVICAL_CANCER_PROLIFERATION_CLUSTER	-1.57305	0.0072993	0.0320274
					KEGG_P53_SIGNALING_PATHWAY	-1.56013	0.0046948	0.0343144
					GO_ZINC_II_ION_TRANSPORT	-1.55498	0.0447761	0.0349713
					REN_ALVEOLAR_RHABDOMYOSARCOMA_DN	-1.53852	0	0.0381256
					ELVIDGE_HYPOXIA_DN	-1.50535	0.0067114	0.0487528

## Sheet: Tab2. PFI-90 24hr GSEA
Supplementary Table S3, Tab2. GSEA of PFI-90 at 1 µM vs DMSO at 24 hours
Upregulated at 24 hours (FDR < 0.05)					Downregulated at 24 hours (FDR < 0.05)
Gene Set	NES	NOM p-val	FDR q-val		Gene Set	NES	NOM p-val	FDR q-val
MITOCHONDRIAL_STRESS_GENES	3.19437	0	0		KDM3B_COMBINED_LEADING_EDGE	-2.67038	0	0
HELLER_SILENCED_BY_METHYLATION_DN	2.94594	0	0		ROSTY_CERVICAL_CANCER_PROLIFERATION_CLUSTER	-2.42657	0	0
SP2509_LSD1_INHIBITOR_INDUCED	2.9241	0	0		JIB04_24H_DOWN	-2.28533	0	0
PODAR_RESPONSE_TO_ADAPHOSTIN_UP	2.9066	0	0		TANG_SENESCENCE_TP53_TARGETS_DN	-2.24402	0	0.000177
GSKJ4_6H_UP	2.9016	0	0		GRYDER_PAX3FOXO1_CRC	-2.18031	0	0.000142
KEGG_RIBOSOME	2.59072	0	0		HALLMARK_G2M_CHECKPOINT	-2.16032	0	0.000118
HALLMARK_MTORC1_SIGNALING	2.55951	0	0		REN_ALVEOLAR_RHABDOMYOSARCOMA_UP	-2.12693	0	0.000195
GSKJ4_24H_UP	2.51463	0	0		GSKJ4_24H_DOWN	-2.11209	0	0.00017
STAMBOLSKY_TARGETS_OF_MUTATED_TP53_DN	2.44312	0	0		HALLMARK_E2F_TARGETS	-2.07432	0	0.000301
REACTOME_TRANSLATION	2.43277	0	0		REN_BOUND_BY_E2F	-2.06225	0	0.000401
HALLMARK_UNFOLDED_PROTEIN_RESPONSE	2.3303	0	0		RMS_CORRELATE_WITH_FGFR4	-2.00198	0	0.000621
HSIAO_HOUSEKEEPING_GENES	2.24663	0	0		KANG_DOXORUBICIN_RESISTANCE_UP	-1.95969	0	0.0017152
HELLER_HDAC_TARGETS_SILENCED_BY_METHYLATION_DN	2.23155	0	0		SP2509_LSD1_INHIBITOR_REPRESSED	-1.93277	0	0.0023693
JIB04_24H_UP	2.15848	0	0.000209		KAMMINGA_EZH2_TARGETS	-1.92561	0.0017825	0.0023452
HALLMARK_HYPOXIA	2.15218	0	0.000195		PRC2_EED_UP.V1_DN	-1.8714	0	0.0046393
HALLMARK_TNFA_SIGNALING_VIA_NFKB	2.09983	0	0.000451		WHITFIELD_CELL_CYCLE_G1_S	-1.8513	0	0.0053357
ELVIDGE_HYPOXIA_BY_DMOG_UP	2.07633	0	0.000518		MYCN_CORRELATED_GENES_IN_PEDTUMOR_DB_UP	-1.83673	0	0.0057071
RH4_BRD4_DOWN	2.03831	0	0.000583		TARGETS_OF_PAX3_FOXO1_MELTZER_CHIPSEQ	-1.81157	0	0.0069467
NISHIBUCHI_SIN3B_UP	2.03434	0	0.00063		PRC2_EZH2_UP.V1_DN	-1.79441	0	0.0080975
FORTSCHEGGER_PHF8_TARGETS_UP	1.97673	0	0.0013428		JACKSON_DNMT1_TARGETS_DN	-1.76058	0.009058	0.0111317
MEK_UP.V1_DN	1.96714	0	0.0017176		DAVICIONI_RHABDOMYOSARCOMA_PAX_FOXO1_FUSION_UP	-1.7471	0	0.0124872
SCIBETTA_KDM5B_TARGETS_UP	1.93731	0	0.0027975		PAL_PRMT5_TARGETS_UP	-1.72709	0	0.0143956
HELLER_HDAC_TARGETS_DN	1.89315	0	0.0046059		WHITFIELD_CELL_CYCLE_G2	-1.70057	0	0.0178284
WANG_RESPONSE_TO_GSK3_INHIBITOR_SB216763_UP	1.86878	0	0.0056071		RH4_PLX1_UP	-1.69056	0	0.0184799
HALLMARK_P53_PATHWAY	1.85645	0	0.0059335		HALLMARK_MYC_TARGETS_V2	-1.67818	0.0034072	0.0199267
DEPMAP_COMMON_ESSENTIALS	1.84834	0	0.0061704		NS132_SKELETAL_MUSCLE_DOWN	-1.66798	0	0.0208924
KAYO_AGING_MUSCLE_DN	1.83386	0	0.0071693		MCMURRAY_TP53_HRAS_COOPERATION_RESPONSE_DN	-1.61417	0.0135364	0.0326123
KEGG_PROTEASOME	1.81313	0.0023364	0.008398		MANALO_HYPOXIA_DN	-1.60531	0	0.0340318
NAGASHIMA_EGF_SIGNALING_UP	1.71191	0.0048662	0.0214603		SCIBETTA_KDM5B_TARGETS_DN	-1.59487	0.0068966	0.0363397
PASINI_SUZ12_TARGETS_UP	1.69724	0.0025	0.0243811		CORRELATED_0.5_WITH_TFAP2B_PAX_FOXO1_EXPRESSION_SIGNATURE_UP	-1.58343	0.004918	0.0384818
NISHIBUCHI_KDM5A_UP	1.69553	0.0050891	0.0244351		WU_APOPTOSIS_BY_CDKN1A_VIA_TP53	-1.55927	0.014733	0.0452015
UDAYAKUMAR_MED1_TARGETS_DN	1.69427	0	0.0239588		MITOCHONDRIA_PROTEOME_V2	-1.55511	0.0395683	0.0451973
KUROKI_KDM3B_UP	1.66925	0.0070588	0.0277656
BILD_HRAS_ONCOGENIC_SIGNATURE	1.65617	0	0.0297648
HALLMARK_APOPTOSIS	1.62311	0.0026178	0.0383539
INGA_TP53_TARGETS	1.6192	0.016632	0.0382974
KYNG_DNA_DAMAGE_UP	1.61449	0	0.0386743
REACTOME_P53_INDEPENDENT_G1_S_DNA_DAMAGE_CHECKPOINT	1.6053	0.0147059	0.0410646
CONCANNON_APOPTOSIS_BY_EPOXOMICIN_UP	1.59494	0	0.043325
KASLER_HDAC7_TARGETS_2_DN	1.5943	0.0201794	0.0424269

## Sheet: Tab3. CRISPRi KDM3B GSEA
Supplementary Table S3, Tab3. GSEA of CRISPRi KDM3B vs CRISPRi Non-targeting Control
KDM3B CRISPRi: Upregulated (FDR < 0.05)					KDM3B CRISPRi: Downregulated (FDR < 0.05)
Gene Set	NES	NOM p-val	FDR q-val		Gene Set	NES	NOM p-val	FDR q-val
KANG_DOXORUBICIN_RESISTANCE_DN	1.97022	0	0.0215925		GRYDER_PAX3FOXO1_JQ1	-2.55892	0	0
HIF1AN_METABOLIC	1.85943	0.00231481	0.0442113		HALLMARK_EPITHELIAL_MESENCHYMAL_TRANSITION	-2.34042	0	0
					RMS_CORRELATE_WITH_FGFR4	-2.26229	0	0.000637498
					CORRELATED_0.5_WITH_TFAP2B_PAX_FOXO1_EXPRESSION_SIGNATURE_UP	-2.24584	0	0.000478124
					JACKSON_DNMT1_TARGETS_DN	-2.2025	0.00180832	0.00079139
					GRYDER_PAX3FOXO1_ENHANCERS_KO_DOWN	-2.18556	0	0.000817026
					REN_ALVEOLAR_RHABDOMYOSARCOMA_UP	-2.15027	0	0.000990938
					EBAUER_TARGETS_OF_PAX3_FOXO1_FUSION_DN	-2.04518	0	0.00318331
					KEGG_RIBOSOME	-2.04025	0	0.00282961
					DAVICIONI_RHABDOMYOSARCOMA_PAX_FOXO1_FUSION_UP	-2.02431	0	0.00303681
					DAVICIONI_PAX_FOXO1_SIGNATURE_IN_ARMS_UP	-1.9808	0.00164204	0.0062984
					TARGETS_OF_PAX3_FOXO1_MELTZER_CHIPSEQ	-1.9763	0	0.00618788
					KUROKI_KDM3B_DOWN	-1.96699	0	0.00655338
					MYCN_CORRELATED_GENES_IN_PEDTUMOR_DB_UP	-1.89861	0	0.0117775
					WANG_LSD1_TARGETS_UP	-1.86303	0.00527241	0.0153098
					TORCHIA_TARGETS_OF_EWSR1_FLI1_FUSION_TOP20_DN	-1.80118	0.00880282	0.0237056
					SENESE_HDAC1_TARGETS_DN	-1.77992	0	0.0268879
					RH4_PLX1_DOWN	-1.77877	0	0.0257792
					HELLER_HDAC_TARGETS_UP	-1.7594	0	0.028414
					GRYDER_PAX3FOXO1_TOP_ENHANCERS	-1.72405	0	0.0355553
					HENDRICKS_SMARCA4_TARGETS_UP	-1.69975	0.00322581	0.0404171
					GO_DIOXYGENASE_ACTIVITY	-1.6968	0.00314465	0.0396445
					DAVICIONI_MOLECULAR_ARMS_VS_ERMS_UP	-1.68674	0	0.0406977
					RH4_CHD4_TARGETS_DN	-1.68155	0.0083612	0.040544
					SP2509_LSD1_INHIBITOR_REPRESSED	-1.67733	0.0100334	0.0405634
					PRC2_EED_UP.V1_DN	-1.66988	0.0014556	0.040763
					DAVICIONI_TARGETS_OF_PAX_FOXO1_FUSIONS_UP	-1.66153	0	0.0417933
					CONCANNON_APOPTOSIS_BY_EPOXOMICIN_DN	-1.65952	0	0.0409281
					PID_P53_DOWNSTREAM_PATHWAY	-1.65171	0.00445765	0.0424298
					GRYDER_PAX3FOXO1_CRC	-1.64091	0.0130933	0.0449797
					WANG_KDM3B_DN	-1.6357	0	0.0453709
					BENPORATH_PRC2_TARGETS	-1.63513	0	0.0441981
					KINSEY_TARGETS_OF_EWSR1_FLII_FUSION_DN	-1.62415	0	0.0468963
					RIGGI_EWING_SARCOMA_PROGENITOR_UP	-1.61767	0	0.0480164

## Sheet: Tab4. CRISPRi KDM1A GSEA
Supplementary Table S3, Tab4. GSEA of CRISPRi KDM1A vs CRISPRi Non-targeting Control
KDM1A CRISPRi: Upregulated (FDR < 0.05)					KDM1A CRISPRi: Down Regulated (FDR < 0.05)
Gene Set	NES	NOM p-val	FDR q-val		Gene Set	NES	NOM p-val	FDR q-val
REN_ALVEOLAR_RHABDOMYOSARCOMA_DN	2.71866	0	0		MANALO_HYPOXIA_DN	-2.76607	0	0
MELANOMA_INVASIVE	2.70293	0	0		HALLMARK_MYC_TARGETS_V2	-2.58569	0	0
EBAUER_MYOGENIC_TARGETS_OF_PAX3_FOXO1_FUSION	2.63165	0	0		KEGG_RIBOSOME	-2.56766	0	0
NS132_SKELETAL_MUSCLE_UP	2.55498	0	0		MYCN_CORRELATED_GENES_IN_PEDTUMOR_DB_UP	-2.45752	0	0
ELVIDGE_HYPOXIA_BY_DMOG_UP	2.50505	0	0		JIB04_24H_DOWN	-2.45177	0	0
EBAUER_TARGETS_OF_PAX3_FOXO1_FUSION_UP	2.49367	0	0		HALLMARK_MYC_TARGETS_V1	-2.4413	0	0
STAMBOLSKY_TARGETS_OF_MUTATED_TP53_DN	2.485	0	0		REACTOME_TRANSLATION	-2.37174	0	0.000144068
HALLMARK_EPITHELIAL_MESENCHYMAL_TRANSITION	2.48146	0	0		REACTOME_MRNA_SPLICING	-2.36262	0	0.000126059
MEK_UP.V1_DN	2.45119	0	0		JMJD6_INTERACTORS	-2.34003	0	0.000112053
MYCN_INDUCTION_6H_UP	2.43953	0	0		DEPMAP_COMMON_ESSENTIALS	-2.33131	0	0.000100847
HALLMARK_TNFA_SIGNALING_VIA_NFKB	2.36221	0	0		HALLMARK_E2F_TARGETS	-2.2973	0	9.16795e-05
HELLER_SILENCED_BY_METHYLATION_UP	2.35466	0	0		PAX3FOXO1_INTERACTORS_NUCLEAR	-2.10213	0	0.000412659
MYCN_SIRNA_IMR32-Q3MYCN-48H_UP	2.35208	0	0		HIF1AN_INTERACTORS_RODRIGUEZ	-2.09801	0	0.000380916
MIYAGAWA_TARGETS_OF_EWSR1_ETS_FUSIONS_DN	2.32035	0	0		GRYDER_PAX3FOXO1_ENHANCERS_KO_DOWN	-2.09078	0	0.000353708
PASINI_SUZ12_TARGETS_DN	2.28763	0	0		HALLMARK_WNT_BETA_CATENIN_SIGNALING	-2.0819	0	0.000330127
SENESE_HDAC1_AND_HDAC2_TARGETS_DN	2.28103	0	0		MOOTHA_VOXPHOS	-2.06822	0	0.000309494
NISHIBUCHI_SIN3B_DN	2.26794	0	0		REACTOME_RESPIRATORY_ELECTRON_TRANSPORT_ATP_SYNTHESIS	-2.04924	0	0.000345552
KUNINGER_IGF1_VS_PDGFB_TARGETS_UP	2.26283	0	0		ELVIDGE_HYPOXIA_DN	-2.02033	0	0.00050188
RH4_PLX1_DOWN	2.26111	0	0		TARGETS_OF_PAX3_FOXO1_MELTZER_CHIPSEQ	-2.019	0	0.000475466
KINSEY_TARGETS_OF_EWSR1_FLII_FUSION_DN	2.24743	0	0		DAVICIONI_PAX_FOXO1_SIGNATURE_IN_ARMS_UP	-1.999	0	0.000737247
PODAR_RESPONSE_TO_ADAPHOSTIN_UP	2.23374	0	0		DAVICIONI_RHABDOMYOSARCOMA_PAX_FOXO1_FUSION_UP	-1.99579	0	0.00070214
SENESE_HDAC3_TARGETS_UP	2.21646	0	0		KEGG_SPLICEOSOME	-1.9911	0	0.00080395
REACTOME_MUSCLE_CONTRACTION	2.19142	0	0		HALLMARK_OXIDATIVE_PHOSPHORYLATION	-1.94509	0	0.00160884
HALLMARK_HYPOXIA	2.17515	0	0		HALLMARK_G2M_CHECKPOINT	-1.93736	0	0.0016239
WANG_KDM3B_DN	2.16559	0	0		AN_KDM3B_UP	-1.91721	0	0.00190029
KONDO_EZH2_TARGETS	2.15295	0	3.90563e-05		MITOCHONDRIA_PROTEOME_V1	-1.87879	0	0.00257395
FOSTER_KDM1A_TARGETS_UP	2.14683	0	7.50267e-05		REN_BOUND_BY_E2F	-1.87215	0	0.00270209
DELASERNA_MYOD_TARGETS_UP	2.14188	0	7.23472e-05		ROSTY_CERVICAL_CANCER_PROLIFERATION_CLUSTER	-1.83696	0	0.00399718
HALLMARK_MYOGENESIS	2.13314	0	0.000105795		JACKSON_DNMT1_TARGETS_DN	-1.82503	0.00229358	0.00445914
SENESE_HDAC2_TARGETS_DN	2.12568	0	0.000102268		FOSTER_KDM1A_TARGETS_DN	-1.82469	0	0.00434383
NISHIBUCHI_KDM5A_DN	2.11407	0	9.89693e-05		WANG_RESPONSE_TO_GSK3_INHIBITOR_SB216763_DN	-1.81881	0	0.00445717
RIGGI_EWING_SARCOMA_PROGENITOR_DN	2.09745	0	0.000126812		GO_METHYLTRANSFERASE_COMPLEX	-1.77399	0	0.00691215
RH4_BRD4_DOWN	2.08927	0	0.00012297		V$NMYC_01	-1.76785	0	0.00715112
NISHIBUCHI_CHD4_DN	2.06997	0	0.000147076		HALLMARK_DNA_REPAIR	-1.75948	0.0026738	0.00777517
HALLMARK_APOPTOSIS	2.05039	0	0.000142874		PRC2_EED_UP.V1_DN	-1.74788	0	0.00834368
HALLMARK_KRAS_SIGNALING_UP	2.04591	0	0.000168808		REACTOME_RNA_POL_II_TRANSCRIPTION	-1.72825	0	0.00958269
DE_YY1_TARGETS_DN	2.03553	0	0.000250471		BRD4_YAPTAZ_JQ1_DOWN	-1.67853	0	0.0149365
SNF5_DN.V1_DN	2.01785	0	0.000243879		CORRELATED_0.5_WITH_TFAP2B_PAX_FOXO1_EXPRESSION_SIGNATURE_UP	-1.67116	0	0.0153011
DAVICIONI_TARGETS_OF_PAX_FOXO1_FUSIONS_DN	2.01779	0	0.000237626		BENPORATH_PRC2_TARGETS	-1.63778	0	0.0202515
WANG_SMARCE1_TARGETS_UP	1.96071	0	0.000618268		HSIAO_HOUSEKEEPING_GENES	-1.61429	0	0.02315
DALESSIO_TSA_RESPONSE	1.94036	0.00357782	0.000775413		WONG_MITOCHONDRIA_GENE_MODULE	-1.60982	0	0.023572
WANG_RESPONSE_TO_GSK3_INHIBITOR_SB216763_UP	1.92902	0	0.000977413		PODAR_RESPONSE_TO_ADAPHOSTIN_DN	-1.60326	0.0306346	0.0244673
JIB04_24H_UP	1.92519	0	0.00100478		EGLN3_INTERACTORS	-1.59078	0	0.0263704
MAHADEVAN_IMATINIB_RESISTANCE_UP	1.91546	0	0.00109741		PID_P53_REGULATION_PATHWAY	-1.58438	0.01	0.0272249
CORDENONSI_YAP_CONSERVED_SIGNATURE	1.91183	0	0.00111694		GRYDER_PAX3FOXO1_TOP_ENHANCERS	-1.56949	0	0.029794
BASAKI_YBX1_TARGETS_DN	1.90495	0	0.00127177		CHROMATIN_REMODELING	-1.54784	0.0351648	0.0342406
SHEN_SMARCA2_TARGETS_UP	1.90368	0	0.00126665		RH30_ETF100	-1.54641	0.0074813	0.033794
HENDRICKS_SMARCA4_TARGETS_UP	1.88013	0	0.00166044		CHROMATIN_MODIFICATION	-1.53684	0.00863931	0.0356295
KIM_MYCN_AMPLIFICATION_TARGETS_DN	1.87658	0	0.00162655		UDAYAKUMAR_MED1_TARGETS_UP	-1.51667	0	0.0410915
CONCANNON_APOPTOSIS_BY_EPOXOMICIN_UP	1.87054	0	0.00173381		DAVICIONI_MOLECULAR_ARMS_VS_ERMS_UP	-1.51512	0	0.0408192
LU_EZH2_TARGETS_DN	1.86937	0	0.00172026		MYCN_SIRNA_IMR32-Q3MYCN-48H_DOWN	-1.51475	0	0.0401638
KLEIN_KDM5B_UP	1.83319	0	0.0027039		SIRNA_SCREEN_RH30_SYNERGY	-1.51	0.0255814	0.0408631
P53_DN.V1_DN	1.80525	0	0.00374735		HALLMARK_UNFOLDED_PROTEIN_RESPONSE	-1.48484	0.0103093	0.0472422
HALLMARK_TGF_BETA_SIGNALING	1.80421	0.00165017	0.0036962		CARFILZOMIB_RESISTANT_DOWN	-1.47627	0	0.0495375
GYORFFY_DOXORUBICIN_RESISTANCE	1.7782	0.00361011	0.00486865
EIF4E_DN	1.77404	0	0.00492586
SENESE_HDAC1_TARGETS_UP	1.76083	0	0.00566962
JIB04_4H_UP	1.75983	0.00154083	0.00559033
P53_DN.V1_UP	1.75965	0	0.00549557
KUROKI_KDM3B_UP	1.74745	0.008726	0.00637908
PAL_PRMT5_TARGETS_DN	1.73183	0.00182149	0.00724024
KUROKI_KDM3B_DOWN	1.72986	0	0.00726985
INGA_TP53_TARGETS	1.72783	0.014652	0.00733254
KLEIN_KDM5B_DOWN	1.7227	0	0.0076452
SENESE_HDAC1_TARGETS_DN	1.71979	0	0.00777784
PRC2_EED_UP.V1_UP	1.71945	0	0.00772326
SENESE_HDAC1_AND_HDAC2_TARGETS_UP	1.71406	0	0.00797408
PRC2_EZH2_UP.V1_UP	1.70803	0.00312012	0.00846998
UDAYAKUMAR_MED1_TARGETS_DN	1.70696	0.0014771	0.0083924
KYNG_DNA_DAMAGE_UP	1.70175	0.00505902	0.00874118
KIM_RESPONSE_TO_TSA_AND_DECITABINE_UP	1.70141	0.00344234	0.00870203
MARTINEZ_TP53_TARGETS_UP	1.68433	0	0.0103613
DAVICIONI_TARGETS_OF_PAX_FOXO1_FUSIONS_UP	1.67991	0	0.0106263
JACKSON_DNMT1_TARGETS_UP	1.67645	0.00524476	0.0108131
HELLER_HDAC_TARGETS_SILENCED_BY_METHYLATION_UP	1.6763	0	0.0106954
KUNINGER_IGF1_VS_PDGFB_TARGETS_DN	1.67376	0.0143369	0.0108369
HALLMARK_ANDROGEN_RESPONSE	1.66749	0.00477707	0.0113594
GBM_PAUSE_CONTROLLED_GENES	1.65243	0.0176678	0.0126433
DAVICIONI_PAX_FOXO1_SIGNATURE_IN_ARMS_DN	1.62275	0.0238532	0.016248
NFE2L2.V2	1.59955	0	0.0200113
SP2509_LSD1_INHIBITOR_INDUCED	1.59403	0.00521739	0.0206886
PASINI_SUZ12_TARGETS_UP	1.57974	0.0066335	0.0227933
BEGUM_TARGETS_OF_PAX3_FOXO1_FUSION_DN	1.57863	0.031746	0.0227746
RORIE_TARGETS_OF_EWSR1_FLI1_FUSION_UP	1.56207	0.0326679	0.0259956
KEGG_P53_SIGNALING_PATHWAY	1.55342	0.00996678	0.0273098
BRD4_JMJD6_NEGATIVELY_REGULATED	1.55148	0.00657895	0.0274129
RIGGI_EWING_SARCOMA_PROGENITOR_UP	1.54987	0.00138889	0.0275243
DELASERNA_MYOD_TARGETS_DN	1.54541	0.0176367	0.0283476
REACTOME_SMOOTH_MUSCLE_CONTRACTION	1.53736	0.0338346	0.0299069
KANG_DOXORUBICIN_RESISTANCE_DN	1.53345	0.0495413	0.0303415
ZHANG_TARGETS_OF_EWSR1_FLI1_FUSION	1.53125	0.0166113	0.0305672
DUTTA_APOPTOSIS_VIA_NFKB	1.52953	0.0345455	0.0305778
TRANSMEMBRANE_RECEPTOR_PROTEIN_KINASE_ACTIVITY	1.5274	0.0245614	0.0307777
CORRELATED_0.5_WITH_TFAP2B_PAX_FOXO1_EXPRESSION_SIGNATURE_DOWN	1.52101	0.0262697	0.0319347
BILD_HRAS_ONCOGENIC_SIGNATURE	1.52013	0.0075188	0.0318775
PID_NFKAPPAB_CANONICAL_PATHWAY	1.50589	0.054386	0.0352021
BAE_BRCA1_TARGETS_UP	1.49983	0.0248756	0.0365571
GSKJ4_24H_UP	1.49707	0.0496323	0.0369427
MARKS_HDAC_TARGETS_UP	1.49198	0.0607143	0.0380703
MIYAGAWA_TARGETS_OF_EWSR1_ETS_FUSIONS_UP	1.47297	0.00464396	0.0437753
PARENT_MTOR_SIGNALING_DN	1.47235	0.0627119	0.0435257

## Sheet: Tab5. CRISPRi KDM4B GSEA
Supplementary Table S3, Tab5. GSEA of CRISPRi KDM4B vs CRISPRi Non-targeting Control
KDM4B CRISPRi: Upregulated (FDR < 0.05)					KDM4B CRISPRi: Downregulated (FDR < 0.05)
Gene Set	NES	NOM p-val	FDR q-val		Gene Set	NES	NOM p-val	FDR q-val

## Sheet: Tab6. CRISPRi KDM5A GSEA
Supplementary Table S3, Tab6. GSEA of CRISPRi KDM5A vs CRISPRi Non-targeting Control
KDM5A CRISPRi: Upregulated (FDR < 0.05)					KDM5A CRISPRi: Downregulated (FDR < 0.05)
Gene Set	NES	NOM p-val	FDR q-val		Gene Set	NES	NOM p-val	FDR q-val
REN_ALVEOLAR_RHABDOMYOSARCOMA_DN	2.25706	0	0		DAVICIONI_RHABDOMYOSARCOMA_PAX_FOXO1_FUSION_UP	-2.0722	0	0.00546256
HALLMARK_EPITHELIAL_MESENCHYMAL_TRANSITION	2.1973	0	0.000507979		HALLMARK_E2F_TARGETS	-2.06924	0	0.00273128
MELANOMA_INVASIVE	2.03639	0	0.0049776		REN_BOUND_BY_E2F	-2.06889	0	0.00182085
KINSEY_TARGETS_OF_EWSR1_FLII_FUSION_DN	1.95966	0	0.00993162		CORRELATED_0.5_WITH_TFAP2B_PAX_FOXO1_EXPRESSION_SIGNATURE_UP	-2.06454	0	0.00185523
TRANSMEMBRANE_RECEPTOR_PROTEIN_KINASE_ACTIVITY	1.94484	0	0.00938309		RMS_CORRELATE_WITH_FGFR4	-2.06144	0	0.00148419
TRICHE_PAX3FOXO1A_TUMOR_DOWN	1.91234	0	0.0111119		KANG_DOXORUBICIN_RESISTANCE_UP	-1.8763	0	0.0144222
CORDENONSI_YAP_CONSERVED_SIGNATURE	1.91175	0.00178571	0.00952447		MANALO_HYPOXIA_DN	-1.86528	0	0.0142758
HALLMARK_TNFA_SIGNALING_VIA_NFKB	1.89783	0	0.0101574		NEGV1	-1.82304	0	0.0187942
NAGASHIMA_EGF_SIGNALING_UP	1.88449	0	0.0103843		HALLMARK_G2M_CHECKPOINT	-1.80797	0	0.0184881
KUROKI_KDM3B_DOWN	1.88199	0	0.00954877		JIB04_24H_DOWN	-1.7701	0	0.0239265
TRANSMEMBRANE_RECEPTOR_PROTEIN_TYROSINE_KINASE_ACTIVITY	1.85187	0	0.0106287		ROSTY_CERVICAL_CANCER_PROLIFERATION_CLUSTER	-1.75235	0	0.025491
SENESE_HDAC1_AND_HDAC2_TARGETS_DN	1.84451	0	0.0106664		DAVICIONI_PAX_FOXO1_SIGNATURE_IN_ARMS_UP	-1.74967	0	0.0236035
KIM_RESPONSE_TO_TSA_AND_DECITABINE_UP	1.78102	0	0.0192866		EBAUER_TARGETS_OF_PAX3_FOXO1_FUSION_DN	-1.74752	0.0045977	0.0222364
PASINI_SUZ12_TARGETS_DN	1.77759	0	0.0187992		MYCN_CORRELATED_GENES_IN_PEDTUMOR_DB_UP	-1.70238	0	0.0322197
DAVICIONI_MOLECULAR_ARMS_VS_ERMS_DN	1.77746	0	0.0175459		DEPMAP_NONESSENTIALS	-1.69775	0.00240385	0.0309808
PODAR_RESPONSE_TO_ADAPHOSTIN_UP	1.77001	0	0.0177411		TANG_SENESCENCE_TP53_TARGETS_DN	-1.69695	0.00856531	0.0292868
NISHIBUCHI_CHD4_DN	1.76098	0	0.0181843		RH4_CHD4_TARGETS_DN	-1.6847	0.00472813	0.0310856
PAL_PRMT5_TARGETS_DN	1.74168	0.00880282	0.0201684		WHITFIELD_CELL_CYCLE_G1_S	-1.65877	0	0.0369147
DALESSIO_TSA_RESPONSE	1.72772	0.0116505	0.0216849		KAMMINGA_EZH2_TARGETS	-1.65846	0.0118483	0.0349719
HELLER_SILENCED_BY_METHYLATION_DN	1.70743	0.00327332	0.0260516		GRYDER_PAX3FOXO1_JQ1	-1.61203	0.00440529	0.0481494
MAHADEVAN_IMATINIB_RESISTANCE_UP	1.69167	0.0148699	0.0282271		KIM_MYCN_AMPLIFICATION_TARGETS_UP	-1.60245	0.00966184	0.0488343
PROTEIN_TYROSINE_KINASE_ACTIVITY	1.6772	0.00187617	0.0313582
SENESE_HDAC2_TARGETS_DN	1.67514	0	0.0306223
KONDO_EZH2_TARGETS	1.66622	0	0.0315268
NISHIBUCHI_SIN3B_UP	1.65624	0.00179211	0.033281
NISHIBUCHI_KDM5A_UP	1.65078	0	0.0335131
HALLMARK_TGF_BETA_SIGNALING	1.63483	0.00831947	0.0374106
DAVICIONI_PAX_FOXO1_SIGNATURE_IN_ARMS_DN	1.62999	0.0238095	0.0372082
DELASERNA_MYOD_TARGETS_DN	1.62817	0.005386	0.0367835
MYCN_SIRNA_IMR32-Q3MYCN-48H_UP	1.62604	0	0.0362089
MIYAGAWA_TARGETS_OF_EWSR1_ETS_FUSIONS_DN	1.60837	0.00161551	0.0407713

## Sheet: Tab7. CRISPRi KDM1A+3B GSEA
Supplementary Table S3, Tab7. GSEA of CRISPRi KDM1A + 3B vs CRISPRi Non-targeting Control
KDM1A + KDM3B CRISPRi: Upregulated (FDR < 0.05)					KDM1A + KDM3B CRISPRi: Downregulated (FDR < 0.05)
Gene Set	NES	NOM p-val	FDR q-val		Gene Set	NES	NOM p-val	FDR q-val
REN_ALVEOLAR_RHABDOMYOSARCOMA_DN	2.88664	0	0		MANALO_HYPOXIA_DN	-2.77947	0	0
HALLMARK_MYOGENESIS	2.54418	0	0		KEGG_RIBOSOME	-2.65172	0	0
MELANOMA_INVASIVE	2.52917	0	0		HALLMARK_MYC_TARGETS_V1	-2.6162	0	0
PASINI_SUZ12_TARGETS_DN	2.51479	0	0		DEPMAP_COMMON_ESSENTIALS	-2.54206	0	0
CORDENONSI_YAP_CONSERVED_SIGNATURE	2.40741	0	0		PAX3FOXO1_INTERACTORS_NUCLEAR	-2.53515	0	0
PODAR_RESPONSE_TO_ADAPHOSTIN_UP	2.40025	0	0		REACTOME_TRANSLATION	-2.51691	0	0
NISHIBUCHI_CHD4_DN	2.38153	0	0		HALLMARK_MYC_TARGETS_V2	-2.48436	0	0
EBAUER_TARGETS_OF_PAX3_FOXO1_FUSION_UP	2.37183	0	0		REACTOME_MRNA_SPLICING	-2.46957	0	0
HALLMARK_TNFA_SIGNALING_VIA_NFKB	2.3519	0	0		JMJD6_INTERACTORS	-2.46839	0	0
EBAUER_MYOGENIC_TARGETS_OF_PAX3_FOXO1_FUSION	2.34982	0	0		HALLMARK_E2F_TARGETS	-2.36827	0	0
SENESE_HDAC1_AND_HDAC2_TARGETS_DN	2.33147	0	0		KEGG_SPLICEOSOME	-2.35251	0	0
HALLMARK_EPITHELIAL_MESENCHYMAL_TRANSITION	2.29985	0	0		HIF1AN_INTERACTORS_RODRIGUEZ	-2.20367	0	0.00054997
HELLER_SILENCED_BY_METHYLATION_UP	2.23407	0	0		GRYDER_PAX3FOXO1_ENHANCERS_KO_DOWN	-2.19032	0	0.000507664
PAL_PRMT5_TARGETS_DN	2.21985	0	0		ROSTY_CERVICAL_CANCER_PROLIFERATION_CLUSTER	-2.16766	0	0.000716189
REACTOME_MUSCLE_CONTRACTION	2.21869	0	0		HALLMARK_G2M_CHECKPOINT	-2.14723	0	0.00079938
DELASERNA_MYOD_TARGETS_UP	2.21107	0	0		MYCN_CORRELATED_GENES_IN_PEDTUMOR_DB_UP	-2.12789	0	0.00120363
MYCN_INDUCTION_6H_UP	2.20758	0	0		TARGETS_OF_PAX3_FOXO1_MELTZER_CHIPSEQ	-2.11519	0	0.00146297
STAMBOLSKY_TARGETS_OF_MUTATED_TP53_DN	2.18456	0	5.11111e-05		KAMMINGA_EZH2_TARGETS	-2.05948	0	0.00228177
ELVIDGE_HYPOXIA_BY_DMOG_UP	2.18355	0	4.84211e-05		REN_BOUND_BY_E2F	-2.05331	0	0.00222472
HALLMARK_HYPOXIA	2.17589	0	4.6e-05		JIB04_24H_DOWN	-2.05011	0	0.00211349
KINSEY_TARGETS_OF_EWSR1_FLII_FUSION_DN	2.16738	0	8.78146e-05		EGLN3_INTERACTORS	-2.00653	0	0.00292585
NS132_SKELETAL_MUSCLE_UP	2.15948	0	8.38231e-05		CORRELATED_0.5_WITH_TFAP2B_PAX_FOXO1_EXPRESSION_SIGNATURE_UP	-1.90764	0	0.0064611
SENESE_HDAC2_TARGETS_DN	2.14913	0	8.01786e-05		CHROMATIN_MODIFICATION	-1.87097	0.0026455	0.00805984
NISHIBUCHI_KDM5A_DN	2.14028	0	7.68378e-05		CHROMATIN_REMODELING	-1.84875	0.0172839	0.00921787
NISHIBUCHI_SIN3B_DN	2.09221	0	0.00011008		REACTOME_RNA_POL_II_TRANSCRIPTION	-1.83138	0	0.0101467
HENDRICKS_SMARCA4_TARGETS_UP	2.09151	0	0.000105846		EBAUER_TARGETS_OF_PAX3_FOXO1_FUSION_DN	-1.81857	0.0026455	0.010987
DAVICIONI_TARGETS_OF_PAX_FOXO1_FUSIONS_DN	2.07661	0	0.000135259		WANG_RESPONSE_TO_GSK3_INHIBITOR_SB216763_DN	-1.78865	0	0.0128466
CONCANNON_APOPTOSIS_BY_EPOXOMICIN_UP	2.0623	0	0.000130429		DAVICIONI_PAX_FOXO1_SIGNATURE_IN_ARMS_UP	-1.77715	0.00289855	0.0137687
MYCN_SIRNA_IMR32-Q3MYCN-48H_UP	2.04465	0	0.000160414		ELVIDGE_HYPOXIA_DN	-1.75783	0	0.0152511
HALLMARK_REACTIVE_OXYGEN_SPECIES_PATHWAY	2.03028	0	0.000185067		BRD4_YAPTAZ_JQ1_DOWN	-1.74612	0	0.0160392
KUNINGER_IGF1_VS_PDGFB_TARGETS_UP	2.00143	0	0.000268373		PAL_PRMT5_TARGETS_UP	-1.74253	0	0.0157523
JIB04_24H_UP	1.99488	0.0016	0.000318274		DAVICIONI_RHABDOMYOSARCOMA_PAX_FOXO1_FUSION_UP	-1.71627	0.0115274	0.0181881
KONDO_EZH2_TARGETS	1.98924	0	0.000337941		GRYDER_PAX3FOXO1_TOP_ENHANCERS	-1.7125	0	0.0183547
SNF5_DN.V1_DN	1.9651	0	0.000544659		DAVICIONI_MOLECULAR_ARMS_VS_ERMS_UP	-1.71228	0	0.0178508
HALLMARK_APOPTOSIS	1.95451	0	0.000583489		TRICHE_PAX3FOXO1A_TUMOR_UP	-1.70174	0	0.0187261
KYNG_DNA_DAMAGE_UP	1.95234	0	0.000567281		CHROMATIN	-1.68695	0.00510204	0.0200964
TRANSMEMBRANE_RECEPTOR_PROTEIN_TYROSINE_KINASE_ACTIVITY	1.92696	0	0.000884514		GO_METHYLTRANSFERASE_COMPLEX	-1.67294	0.00301205	0.0213805
MIYAGAWA_TARGETS_OF_EWSR1_ETS_FUSIONS_DN	1.92233	0	0.000933511		PID_P53_REGULATION_PATHWAY	-1.67092	0.00273224	0.0210562
BIOCARTA_P53HYPOXIA_PATHWAY	1.9182	0	0.00100454		KANG_DOXORUBICIN_RESISTANCE_UP	-1.66239	0.00808625	0.0217053
DAVICIONI_TARGETS_OF_PAX_FOXO1_FUSIONS_UP	1.90816	0	0.00121734		V$NMYC_01	-1.64858	0	0.0230141
PROTEIN_TYROSINE_KINASE_ACTIVITY	1.90653	0.00161551	0.00118765		GRYDER_PAX3FOXO1_JQ1	-1.62517	0.00900901	0.0260321
DALESSIO_TSA_RESPONSE	1.89463	0.00175439	0.00134127		HALLMARK_DNA_REPAIR	-1.58522	0	0.0334333
DAVICIONI_PAX_FOXO1_SIGNATURE_IN_ARMS_DN	1.89219	0.00489396	0.0013756		RH4_CHD4_TARGETS_DN	-1.58299	0.0136612	0.0332548
SENESE_HDAC1_TARGETS_DN	1.8716	0	0.00164386		GRYDER_PAX3FOXO1_CRC	-1.57162	0.0129199	0.0353614
JIB04_4H_UP	1.8504	0	0.00218015		KDM3B_COMBINED_LEADING_EDGE	-1.56535	0.00373134	0.0357949
LIN_REST_UP	1.8456	0	0.00225623		HALLMARK_WNT_BETA_CATENIN_SIGNALING	-1.56356	0.0253521	0.0353311
P53_DN.V1_UP	1.84303	0	0.00234442		WHITFIELD_CELL_CYCLE_S	-1.52267	0.00359712	0.0451886
TRANSMEMBRANE_RECEPTOR_PROTEIN_KINASE_ACTIVITY	1.8377	0.003125	0.00251036		CHROMATIN_ASSEMBLY_OR_DISASSEMBLY	-1.52263	0.0454545	0.0442727
BEGUM_TARGETS_OF_PAX3_FOXO1_FUSION_DN	1.83294	0.00158983	0.0025356
RORIE_TARGETS_OF_EWSR1_FLI1_FUSION_UP	1.82722	0.0049505	0.00267326
HELLER_HDAC_TARGETS_SILENCED_BY_METHYLATION_UP	1.82647	0	0.00262084
SENESE_HDAC3_TARGETS_DN	1.8222	0	0.00267895
MEK_UP.V1_UP	1.82156	0	0.00264665
MARKS_HDAC_TARGETS_UP	1.82069	0.0034662	0.00261445
INGA_TP53_TARGETS	1.7841	0.00894454	0.00393407
TRICHE_PAX3FOXO1A_TUMOR_DOWN	1.78013	0	0.00407692
REACTOME_SMOOTH_MUSCLE_CONTRACTION	1.77784	0.00319489	0.00407056
DAVICIONI_MOLECULAR_ARMS_VS_ERMS_DN	1.76858	0	0.0045454
RH4_PLX1_DOWN	1.75196	0	0.00542794
KIM_RESPONSE_TO_TSA_AND_DECITABINE_UP	1.74593	0	0.0056333
WANG_KDM3B_DN	1.7272	0	0.00668555
KEGG_P53_SIGNALING_PATHWAY	1.72654	0	0.00659236
ZHANG_TARGETS_OF_EWSR1_FLI1_FUSION	1.72241	0	0.00675489
HALLMARK_TGF_BETA_SIGNALING	1.71128	0.00305344	0.00724655
UDAYAKUMAR_MED1_TARGETS_DN	1.70423	0	0.00781217
FOSTER_KDM1A_TARGETS_UP	1.69594	0	0.00837045
HALLMARK_KRAS_SIGNALING_UP	1.68949	0	0.00890654
SP2509_LSD1_INHIBITOR_INDUCED	1.66642	0.00598802	0.0112579
RH4_BRD4_DOWN	1.66178	0	0.0116799
KUROKI_KDM3B_UP	1.65938	0.00490998	0.0119012
KLEIN_KDM5B_DOWN	1.65704	0	0.0120744
BAE_BRCA1_TARGETS_UP	1.64944	0.00894188	0.0130759
GBM_PAUSE_CONTROLLED_GENES	1.64571	0.00734214	0.0133967
WANG_SMARCE1_TARGETS_UP	1.63031	0	0.0153883
RH4_BRD4_UP	1.62736	0.00420168	0.0154936
HELLER_HDAC_TARGETS_UP	1.61252	0	0.0174233
NISHIBUCHI_KDM5A_UP	1.59884	0.00290698	0.0194107
MEK_UP.V1_DN	1.5984	0.00260756	0.0192222
FISCHER_DIRECT_P53_TARGETS_META_ANALYSIS	1.59735	0	0.0190754
HALLMARK_P53_PATHWAY	1.58837	0.00269179	0.0205085
MARIADASON_REGULATED_BY_HISTONE_ACETYLATION_UP	1.58593	0.00776398	0.0207095
PASINI_SUZ12_TARGETS_UP	1.57784	0.0104948	0.0220995
RIGGI_EWING_SARCOMA_PROGENITOR_UP	1.57739	0	0.0218999
NAGASHIMA_EGF_SIGNALING_UP	1.55547	0.0139752	0.0267709
WANG_KDM3B_UP	1.55233	0	0.0272102
RH4_PLX1_UP	1.54744	0.00248447	0.0280998
NISHIBUCHI_CHD4_UP	1.54555	0.00583942	0.0281948
SATO_SILENCED_BY_DEACETYLATION_IN_PANCREATIC_CANCER	1.54222	0.0315091	0.0285741
HELLER_SILENCED_BY_METHYLATION_DN	1.53951	0.0101449	0.0288476
GSKJ4_6H_UP	1.5301	0.0261137	0.0309667
NFE2L2.V2	1.51931	0.00249377	0.0332882
BILD_HRAS_ONCOGENIC_SIGNATURE	1.51798	0.00263158	0.0333358
LU_EZH2_TARGETS_DN	1.49247	0	0.0410977
PRC2_EZH2_UP.V1_UP	1.48644	0.0146862	0.0427367
KANG_DOXORUBICIN_RESISTANCE_DN	1.4825	0.0449827	0.0435744
KLEIN_KDM5B_UP	1.47272	0.00805369	0.0467229
HALLMARK_ANDROGEN_RESPONSE	1.47269	0.0174927	0.0462412
HALLMARK_GLYCOLYSIS	1.46945	0.00780234	0.0471751
HALLMARK_HEME_METABOLISM	1.46922	0.00802139	0.0468033
REACTOME_POST_TRANSLATIONAL_PROTEIN_MODIFICATION	1.46588	0.00937082	0.0476553
JIB04_4H_DOWN	1.46348	0.0686106	0.0480853

## Sheet: Tab8. CRISPRi KDM3B+4B GSEA
Supplementary Table S3, Tab8. GSEA of CRISPRi KDM3B + 4B vs CRISPRi Non-targeting Control
KDM3B + KDM4B CRISPRi: Upregulated (FDR < 0.05)					KDM3B + KDM4B CRISPRi: Downregulated (FDR < 0.05)
Gene Set	NES	NOM p-val	FDR q-val		Gene Set	NES	NOM p-val	FDR q-val
					GO_DIOXYGENASE_ACTIVITY	-2.10666	0	0.0155466

## Sheet: Tab9. CRISPRi KDM3B+5A GSEA
Supplementary Table S3, Tab9. GSEA of CRISPRi KDM3B + 5A vs CRISPRi Non-targeting Control
KDM3B + KDM5A CRISPRi: Upregulated (FDR < 0.05)					KDM3B + KDM5A CRISPRi: Downregulated (FDR < 0.05)
Gene Set	NES	NOM p-val	FDR q-val		Gene Set	NES	NOM p-val	FDR q-val
MYCN_INDUCTION_6H_UP	2.06631	0	0.0136777		GRYDER_PAX3FOXO1_JQ1	-2.09822	0	0.0192016
REACTOME_SMOOTH_MUSCLE_CONTRACTION	2.02935	0.00209644	0.00888019		GO_DIOXYGENASE_ACTIVITY	-2.03733	0	0.0166441
PASINI_SUZ12_TARGETS_DN	1.89835	0	0.0232241		HENDRICKS_SMARCA4_TARGETS_UP	-1.94113	0	0.0349328
REACTOME_MUSCLE_CONTRACTION	1.79591	0	0.0472729
CORDENONSI_YAP_CONSERVED_SIGNATURE	1.71749	0	0.0488036
INGA_TP53_TARGETS	1.68476	0.0147059	0.0486039

## Sheet: Tab 10. CRISPRi KDM1A+5A GSEA
Supplementary Table S3, Tab10. GSEA of CRISPRi KDM1A + 5A vs CRISPRi Non-targeting Control
KDM1A + KDM5A CRISPRi: Upregulated (FDR < 0.05)					KDM1A + KDM5A CRISPRi: Downregulated (FDR < 0.05)
Gene Set	NES	NOM p-val	FDR q-val		Gene Set	NES	NOM p-val	FDR q-val
REN_ALVEOLAR_RHABDOMYOSARCOMA_DN	2.76271	0	0		KEGG_RIBOSOME	-3.29567	0	0
HALLMARK_EPITHELIAL_MESENCHYMAL_TRANSITION	2.70639	0	0		MANALO_HYPOXIA_DN	-3.26468	0	0
MELANOMA_INVASIVE	2.69889	0	0		HALLMARK_MYC_TARGETS_V1	-3.23129	0	0
EBAUER_MYOGENIC_TARGETS_OF_PAX3_FOXO1_FUSION	2.53172	0	0		ROSTY_CERVICAL_CANCER_PROLIFERATION_CLUSTER	-3.16959	0	0
STAMBOLSKY_TARGETS_OF_MUTATED_TP53_DN	2.52642	0	0		REACTOME_TRANSLATION	-3.11767	0	0
PASINI_SUZ12_TARGETS_DN	2.51233	0	0		HALLMARK_E2F_TARGETS	-3.10296	0	0
HALLMARK_MYOGENESIS	2.48989	0	0		JMJD6_INTERACTORS	-3.02973	0	0
NS132_SKELETAL_MUSCLE_UP	2.46805	0	0		DEPMAP_COMMON_ESSENTIALS	-2.99398	0	0
EBAUER_TARGETS_OF_PAX3_FOXO1_FUSION_UP	2.46088	0	0		HALLMARK_MYC_TARGETS_V2	-2.9071	0	0
MEK_UP.V1_DN	2.43686	0	0		JIB04_24H_DOWN	-2.76739	0	0
KINSEY_TARGETS_OF_EWSR1_FLII_FUSION_DN	2.39955	0	0		PAX3FOXO1_INTERACTORS_NUCLEAR	-2.75944	0	0
HALLMARK_TNFA_SIGNALING_VIA_NFKB	2.39043	0	0		HALLMARK_G2M_CHECKPOINT	-2.74955	0	0
MIYAGAWA_TARGETS_OF_EWSR1_ETS_FUSIONS_DN	2.38316	0	0		KEGG_SPLICEOSOME	-2.73693	0	0
KONDO_EZH2_TARGETS	2.38308	0	0		REACTOME_MRNA_SPLICING	-2.69646	0	0
ELVIDGE_HYPOXIA_BY_DMOG_UP	2.37741	0	0		REN_BOUND_BY_E2F	-2.56163	0	0
NISHIBUCHI_CHD4_DN	2.33678	0	0		KANG_DOXORUBICIN_RESISTANCE_UP	-2.51812	0	0
KUNINGER_IGF1_VS_PDGFB_TARGETS_UP	2.32885	0	0		MITOCHONDRIA_PROTEOME_V1	-2.47935	0	0
HELLER_SILENCED_BY_METHYLATION_UP	2.32109	0	0		MYCN_CORRELATED_GENES_IN_PEDTUMOR_DB_UP	-2.39504	0	0.000101307
MYCN_SIRNA_IMR32-Q3MYCN-48H_UP	2.30659	0	0		KAMMINGA_EZH2_TARGETS	-2.36214	0	9.59752e-05
SENESE_HDAC1_AND_HDAC2_TARGETS_DN	2.30447	0	0		TANG_SENESCENCE_TP53_TARGETS_DN	-2.23491	0	0.000188051
NISHIBUCHI_SIN3B_DN	2.29305	0	0		BENPORATH_PROLIFERATION	-2.21719	0	0.000179097
PODAR_RESPONSE_TO_ADAPHOSTIN_UP	2.27995	0	0		WANG_RESPONSE_TO_GSK3_INHIBITOR_SB216763_DN	-2.21215	0	0.000170956
DELASERNA_MYOD_TARGETS_UP	2.27318	0	0		HIF1AN_INTERACTORS_RODRIGUEZ	-2.2073	0	0.000163523
RH4_BRD4_DOWN	2.27013	0	0		REACTOME_RESPIRATORY_ELECTRON_TRANSPORT_ATP_SYNTHESIS	-2.18531	0	0.00015671
MYCN_INDUCTION_6H_UP	2.24354	0	0		GO_METHYLTRANSFERASE_COMPLEX	-2.15558	0	0.000227941
RH4_PLX1_DOWN	2.24169	0	0		REACTOME_RNA_POL_II_TRANSCRIPTION	-2.09073	0	0.000354345
SENESE_HDAC2_TARGETS_DN	2.23217	0	0		BRD4_YAPTAZ_JQ1_DOWN	-2.08161	0	0.000398628
DAVICIONI_TARGETS_OF_PAX_FOXO1_FUSIONS_DN	2.21899	0	0		ELVIDGE_HYPOXIA_DN	-2.02695	0	0.00068532
NISHIBUCHI_KDM5A_DN	2.20911	0	0		GSKJ4_24H_DOWN	-1.95476	0	0.00242235
HALLMARK_HYPOXIA	2.18849	0	2.86822e-05		WHITFIELD_CELL_CYCLE_G1_S	-1.92701	0	0.00353903
WANG_KDM3B_DN	2.18801	0	2.77569e-05		HSIAO_HOUSEKEEPING_GENES	-1.89498	0	0.00439988
CORDENONSI_YAP_CONSERVED_SIGNATURE	2.17414	0	2.68895e-05		MOOTHA_VOXPHOS	-1.888	0	0.00448169
WANG_SMARCE1_TARGETS_UP	2.14508	0	2.60747e-05		HALLMARK_OXIDATIVE_PHOSPHORYLATION	-1.87767	0	0.00488369
HALLMARK_KRAS_SIGNALING_UP	2.11994	0	0.000101042		CHROMATIN_MODIFICATION	-1.86039	0	0.00542558
KIM_RESPONSE_TO_TSA_AND_DECITABINE_UP	2.11297	0	9.81549e-05		EGLN3_INTERACTORS	-1.83288	0	0.00650108
HENDRICKS_SMARCA4_TARGETS_UP	2.10622	0	9.54283e-05		CHROMATIN_REMODELING	-1.80976	0.0128617	0.00743289
DAVICIONI_PAX_FOXO1_SIGNATURE_IN_ARMS_DN	2.10169	0	9.28492e-05		PID_P53_REGULATION_PATHWAY	-1.78768	0	0.00872638
DALESSIO_TSA_RESPONSE	2.08484	0	0.000134337		HALLMARK_DNA_REPAIR	-1.75408	0	0.0110726
BEGUM_TARGETS_OF_PAX3_FOXO1_FUSION_DN	2.07916	0	0.000130892		PAL_PRMT5_TARGETS_UP	-1.68163	0	0.0181174
REACTOME_MUSCLE_CONTRACTION	2.07476	0	0.00012762		WU_APOPTOSIS_BY_CDKN1A_VIA_TP53	-1.63786	0.0159363	0.023774
JIB04_24H_UP	2.06827	0	0.000124507		REACTOME_REGULATION_OF_MRNA_STABILITY_BY_PROTEINS_THAT_BIND_AU_RICH_ELEMENTS	-1.61732	0	0.0261046
TRANSMEMBRANE_RECEPTOR_PROTEIN_KINASE_ACTIVITY	2.06724	0	0.000121543		BRD4_INTERACTORS_BIOGRID	-1.5926	0	0.030158
P53_DN.V1_UP	2.05923	0	0.000138125		WONG_MITOCHONDRIA_GENE_MODULE	-1.58177	0	0.0316079
SNF5_DN.V1_DN	2.05892	0	0.000134986		MITOCHONDRIA_BCO2_KO_DOWN	-1.56716	0.0283286	0.0340537
TRANSMEMBRANE_RECEPTOR_PROTEIN_TYROSINE_KINASE_ACTIVITY	2.05818	0	0.000131986		UDAYAKUMAR_MED1_TARGETS_UP	-1.56128	0	0.0342795
DAVICIONI_TARGETS_OF_PAX_FOXO1_FUSIONS_UP	2.05574	0	0.000129117		CHROMATIN_ASSEMBLY_OR_DISASSEMBLY	-1.55463	0.0414013	0.0350678
HALLMARK_APOPTOSIS	2.02983	0	0.000181359		REACTOME_P53_INDEPENDENT_G1_S_DNA_DAMAGE_CHECKPOINT	-1.51562	0.0398406	0.0441142
SENESE_HDAC3_TARGETS_UP	2.02852	0	0.000177581		V$NMYC_01	-1.50922	0	0.0452182
CONCANNON_APOPTOSIS_BY_EPOXOMICIN_UP	2.0278	0	0.000173956		HALLMARK_WNT_BETA_CATENIN_SIGNALING	-1.4903	0.0332103	0.0497387
SENESE_HDAC1_TARGETS_DN	2.02354	0	0.000170477		TARGETS_OF_PAX3_FOXO1_MELTZER_CHIPSEQ	-1.48917	0.0192308	0.0491082
FOSTER_KDM1A_TARGETS_UP	2.02113	0	0.000167135
PRC2_EZH2_UP.V1_UP	1.99793	0	0.000229193
P53_DN.V1_DN	1.98616	0	0.000240557
KYNG_DNA_DAMAGE_UP	1.98399	0	0.000252036
HALLMARK_TGF_BETA_SIGNALING	1.94038	0	0.000340352
GBM_PAUSE_CONTROLLED_GENES	1.9345	0	0.000349178
PROTEIN_TYROSINE_KINASE_ACTIVITY	1.93421	0	0.000343052
RIGGI_EWING_SARCOMA_PROGENITOR_UP	1.93301	0	0.000337138
HELLER_HDAC_TARGETS_SILENCED_BY_METHYLATION_UP	1.90639	0	0.000574223
KIM_MYCN_AMPLIFICATION_TARGETS_DN	1.90335	0	0.000607689
PAL_PRMT5_TARGETS_DN	1.88851	0.00145985	0.000780969
KLEIN_KDM5B_DOWN	1.88514	0	0.000768373
LU_EZH2_TARGETS_DN	1.87631	0	0.000878195
KLEIN_KDM5B_UP	1.87486	0	0.000890855
JACKSON_DNMT1_TARGETS_UP	1.86077	0.00127226	0.000993875
MAHADEVAN_IMATINIB_RESISTANCE_UP	1.85194	0	0.00114673
CORRELATED_0.5_WITH_TFAP2B_PAX_FOXO1_EXPRESSION_SIGNATURE_DOWN	1.84112	0	0.00141193
GYORFFY_DOXORUBICIN_RESISTANCE	1.84096	0.00273224	0.00139117
MEK_UP.V1_UP	1.83674	0	0.00142005
TRICHE_PAX3FOXO1A_TUMOR_DOWN	1.82822	0	0.00156685
KRIEG_HYPOXIA_VIA_KDM3A	1.82717	0	0.00155695
KUROKI_KDM3B_DOWN	1.81506	0	0.00173706
JIB04_4H_UP	1.81229	0	0.00178238
RORIE_TARGETS_OF_EWSR1_FLI1_FUSION_UP	1.79931	0.00147493	0.00212339
KEGG_P53_SIGNALING_PATHWAY	1.77251	0.00253807	0.00292967
WANG_RESPONSE_TO_GSK3_INHIBITOR_SB216763_UP	1.75512	0	0.00361549
KUROKI_KDM3B_UP	1.74699	0.00405405	0.0039664
MIYAGAWA_TARGETS_OF_EWSR1_ETS_FUSIONS_UP	1.74684	0	0.00391554
HALLMARK_ANDROGEN_RESPONSE	1.74439	0	0.00395153
FISCHER_DIRECT_P53_TARGETS_META_ANALYSIS	1.73911	0	0.00422991
GSKJ4_24H_UP	1.72439	0.0135542	0.00496271
DAVICIONI_MOLECULAR_ARMS_VS_ERMS_DN	1.71528	0	0.00544037
HELLER_HDAC_TARGETS_UP	1.71161	0.00105708	0.0056828
SP2509_LSD1_INHIBITOR_INDUCED	1.70203	0.00244798	0.00636924
BASAKI_YBX1_TARGETS_DN	1.69174	0	0.00704363
HELLER_SILENCED_BY_METHYLATION_DN	1.68321	0.00366748	0.00755236
REN_ALVEOLAR_RHABDOMYOSARCOMA_UP	1.67902	0.00359712	0.0078192
V$MYOD_01	1.67519	0	0.00806823
NAGASHIMA_EGF_SIGNALING_UP	1.675	0.00792602	0.00800592
UDAYAKUMAR_MED1_TARGETS_DN	1.66488	0	0.00887882
SNF5_DN.V1_UP	1.65713	0.00115741	0.00943283
DE_YY1_TARGETS_DN	1.65522	0.00243309	0.00947774
BIOCARTA_P53HYPOXIA_PATHWAY	1.65215	0.01443	0.00960338
BILD_HRAS_ONCOGENIC_SIGNATURE	1.64716	0	0.0100762
NISHIBUCHI_KDM5A_UP	1.64082	0.0011534	0.0107988
RIGGI_EWING_SARCOMA_PROGENITOR_DN	1.63243	0	0.0117163
MARIADASON_REGULATED_BY_HISTONE_ACETYLATION_UP	1.6281	0.00255102	0.0121046
PRC2_EED_UP.V1_UP	1.61287	0.0045403	0.0136778
WANG_KDM3B_UP	1.61031	0	0.0138664
P53_DN.V2_UP	1.5972	0	0.0155372
NISHIBUCHI_SIN3B_UP	1.58924	0.00976801	0.0165853
REACTOME_SMOOTH_MUSCLE_CONTRACTION	1.58362	0.020438	0.0173118
BEGUM_TARGETS_OF_PAX3_FOXO1_FUSION_UP	1.58224	0.0201258	0.0174154
SENESE_HDAC3_TARGETS_DN	1.57789	0	0.0180198
MARKS_HDAC_TARGETS_UP	1.57388	0.0229008	0.0186141
NFE2L2.V2	1.56357	0	0.0202422
BAE_BRCA1_TARGETS_UP	1.5577	0.0275	0.0211596
MARTINEZ_TP53_TARGETS_UP	1.55528	0	0.0213723
ZHANG_TARGETS_OF_EWSR1_FLI1_FUSION	1.55504	0.00993789	0.0212385
DUTTA_APOPTOSIS_VIA_NFKB	1.55272	0.0386266	0.0214619
RMS_CORRELATE_WITH_FGFR4	1.54745	0.00109409	0.0222541
PID_P53_DOWNSTREAM_PATHWAY	1.54544	0.0115473	0.0224845
LIN_REST_UP	1.54057	0.00107181	0.0232796
MYCN_INDUCTION_6H_DOWN	1.53669	0	0.0238927
SENESE_HDAC1_AND_HDAC2_TARGETS_UP	1.52204	0.0021692	0.0269552
SENESE_HDAC1_TARGETS_UP	1.51874	0	0.0274855
HALLMARK_P53_PATHWAY	1.51694	0.00539957	0.0276432
HELLER_HDAC_TARGETS_SILENCED_BY_METHYLATION_DN	1.48932	0.00214133	0.0346241
WANG_SMARCE1_TARGETS_DN	1.47477	0.00312175	0.0391459
DELASERNA_MYOD_TARGETS_DN	1.46944	0.0394737	0.04043
PASINI_SUZ12_TARGETS_UP	1.46605	0.0207824	0.0413519
KASLER_HDAC7_TARGETS_1_DN	1.45289	0.0678466	0.0460509
HALLMARK_ESTROGEN_RESPONSE_EARLY	1.45254	0.0153846	0.0458073
REACTOME_POST_TRANSLATIONAL_PROTEIN_MODIFICATION	1.45027	0.0135593	0.0464164
