# Supplementary material for: KDM3B inhibitors disrupt PAX3-FOXO1 oncogenic activity in fusion positive rhabdomyosarcoma.
Source: Research Square preprint supplement (doi:10.21203/rs.3.rs-2298627/v1), 2022-11-29
Supplement: Supplementary file 8 [file e6f85d6079b20191d0f590a4.xlsx]

## Sheet: Tab1. Summary of P3F NES
Supplementary Table S2, Tab1. Summary of PAX3-FOXO1 gene sets downregulated in GSEA of RNA-seq
		Category	GRYDER_PAX3FOXO1_ENHANCERS_KO_DOWN	EBAUER_TARGETS_OF_PAX3_FOXO1_FUSION_DN	GRYDER_PAX3FOXO1_JQ1	DAVICIONI_RHABDOMYOSARCOMA_PAX_FOXO1_FUSION_UP	TARGETS_OF_PAX3_FOXO1_MELTZER_CHIPSEQ	DAVICIONI_TARGETS_OF_PAX_FOXO1_FUSIONS_UP	BEGUM_TARGETS_OF_PAX3_FOXO1_FUSION_UP	DAVICIONI_PAX_FOXO1_SIGNATURE_IN_ARMS_UP	CORRELATED_0.5_WITH_TFAP2B_PAX_FOXO1_EXPRESSION_SIGNATURE_UP	DAVICIONI_MOLECULAR_ARMS_VS_ERMS_UP	GRYDER_PAX3FOXO1_CRC	TRICHE_PAX3FOXO1A_TUMOR_UP	GRYDER_PAX3FOXO1_TOP_ENHANCERS		Total NES Score
	shPAX3-FOXO1		-3.28169	-2.48828	-2.48786	-2.47957	-2.46639	-2.35355	-2.27047	-2.25205	-2.21506	-1.76972	-1.74453	-1.74401	-1.70565		-29.2588
	PFI-63 (UPCMLD0ENAT5834780)	HDAC-Like	-2.17239	-2.58988	-2.88787	-2.45725	-2.33045	-1.73178	-2.2234	-2.33103	-2.79697	-2.11199		-2.21502	-1.92825		-27.7763
	KUC102648N	HDAC-Like	-1.59592	-1.57471	-2.52906	-1.50622	-1.59356				-2.19499	-1.53342	-1.49203	-1.71951	-1.49246		-17.2319
	NP005584	HDAC-Like	-1.55841		-3.03921		-2.04597						-2.50441		-1.46613		-10.6141
	KUC100517N	ALK Selective			-1.68205		-1.86456				-1.90342						-5.45003
	78902794023	Strong Inhibitor							-2.13909								-2.13909
	78800610218	ALK Selective															0
	IMMLG5770	HDAC-Like															0

## Sheet: Tab2. shPAX3-FOXO1 GSEA
Supplementary Table S2, Tab2. GSEA of shPAX3-FOXO1 vs non-targeting control sh (48 hours after transduction)
Down Regulated (FDR < 0.05)					Up Regulated (FDR < 0.05)
Gene Set	NES	NOM p-val	FDR q-val		Gene Set	NES	NOM p-val	FDR q-val
GRYDER_PAX3FOXO1_ENHANCERS_KO_DOWN	-3.28169	0	0		EBAUER_MYOGENIC_TARGETS_OF_PAX3_FOXO1_FUSION	2.92587	0	0
EBAUER_TARGETS_OF_PAX3_FOXO1_FUSION_DN	-2.48828	0	0		EBAUER_TARGETS_OF_PAX3_FOXO1_FUSION_UP	2.77821	0	0
GRYDER_PAX3FOXO1_JQ1	-2.48786	0	0		KUNINGER_IGF1_VS_PDGFB_TARGETS_UP	2.77603	0	0
DAVICIONI_RHABDOMYOSARCOMA_PAX_FOXO1_FUSION_UP	-2.47957	0	0		NS132_SKELETAL_MUSCLE_UP	2.68168	0	0
TARGETS_OF_PAX3_FOXO1_MELTZER_CHIPSEQ	-2.46639	0	0		HALLMARK_MYOGENESIS	2.62583	0	0
DAVICIONI_TARGETS_OF_PAX_FOXO1_FUSIONS_UP	-2.35355	0	0		DAVICIONI_TARGETS_OF_PAX_FOXO1_FUSIONS_DN	2.50767	0	0
RH4_CHD4_TARGETS_DN	-2.29243	0	0		DELASERNA_MYOD_TARGETS_UP	2.38381	0	0
BEGUM_TARGETS_OF_PAX3_FOXO1_FUSION_UP	-2.27047	0	0		REACTOME_RESPIRATORY_ELECTRON_TRANSPORT_ATP_SYNTHESIS	2.33272	0	0
DAVICIONI_PAX_FOXO1_SIGNATURE_IN_ARMS_UP	-2.25205	0	0		DAVICIONI_PAX_FOXO1_SIGNATURE_IN_ARMS_DN	2.32206	0	0
CORRELATED_0.5_WITH_TFAP2B_PAX_FOXO1_EXPRESSION_SIGNATURE_UP	-2.21506	0	0		REACTOME_MUSCLE_CONTRACTION	2.21883	0	0
BENPORATH_PRC2_TARGETS	-1.91215	0	0.00417812		MOOTHA_VOXPHOS	2.19571	0	0
RH4_BRD4_DOWN	-1.83096	0	0.00947936		KEGG_RIBOSOME	2.0435	0	0.00062688
DAVICIONI_MOLECULAR_ARMS_VS_ERMS_UP	-1.76972	0	0.0184308		KUROKI_KDM3B_DOWN	1.96813	0	0.00175513
SIRNA_SCREEN_RH30_SYNERGY	-1.75263	0.00357143	0.020252		WONG_MITOCHONDRIA_GENE_MODULE	1.95357	0	0.00214847
GRYDER_PAX3FOXO1_CRC	-1.74453	0.00353357	0.0205878		PASINI_SUZ12_TARGETS_DN	1.89657	0	0.00457053
TRICHE_PAX3FOXO1A_TUMOR_UP	-1.74401	0	0.0193516		SENESE_HDAC2_TARGETS_DN	1.79041	0	0.0138168
TRANSMEMBRANE_RECEPTOR_PROTEIN_TYROSINE_KINASE_ACTIVITY	-1.73298	0.0037594	0.0201485		KINSEY_TARGETS_OF_EWSR1_FLII_FUSION_DN	1.77873	0	0.0145993
TRANSMEMBRANE_RECEPTOR_PROTEIN_KINASE_ACTIVITY	-1.70818	0	0.0247574		RMS_CORRELATE_WITH_FGFR4	1.77416	0	0.0146025
GRYDER_PAX3FOXO1_TOP_ENHANCERS	-1.70565	0	0.0239544		HALLMARK_OXIDATIVE_PHOSPHORYLATION	1.7538	0	0.0172226
PID_EPO_PATHWAY	-1.70333	0.00718133	0.0234104		SENESE_HDAC3_TARGETS_DN	1.75344	0	0.0163614
DUTTA_APOPTOSIS_VIA_NFKB	-1.66783	0.00583658	0.0301296		BAE_BRCA1_TARGETS_UP	1.71876	0	0.0215404
MEK_UP.V1_UP	-1.63312	0	0.0400515		REN_BOUND_BY_E2F	1.6812	0.00671141	0.0292612
STAMBOLSKY_BOUND_BY_MUTATED_TP53	-1.62313	0.0260708	0.0413525		REACTOME_TRANSLATION	1.64646	0.0025641	0.0407068
BEGUM_TARGETS_OF_PAX3_FOXO1_FUSION_DN	-1.61761	0.0108696	0.0418312		ROME_INSULIN_TARGETS_IN_MUSCLE_UP	1.62551	0	0.0465704

## Sheet: Tab3. PFI63 GSEA
Supplementary Table S2, Tab3. GSEA of PFI-63 (UPCMLD0ENAT5834780) 10 µM vs DMSO at 6 hrs
Down Regulated (FDR < 0.05)					Up Regulated (FDR < 0.05)
Gene Set	NES	NOM p-val	FDR q-val		Gene Set	NES	NOM p-val	FDR q-val
GRYDER_PAX3FOXO1_JQ1	-2.88787	0	0		HALLMARK_HYPOXIA	3.12848	0	0
CORRELATED_0.5_WITH_TFAP2B_PAX_FOXO1_EXPRESSION_SIGNATURE_UP	-2.79697	0	0		JIB04_4H_UP	3.119	0	0
GSKJ4_24H_DOWN	-2.71684	0	0		ELVIDGE_HYPOXIA_BY_DMOG_UP	3.05086	0	0
ROSTY_CERVICAL_CANCER_PROLIFERATION_CLUSTER	-2.60761	0	0		CONCANNON_APOPTOSIS_BY_EPOXOMICIN_UP	2.72351	0	0
EBAUER_TARGETS_OF_PAX3_FOXO1_FUSION_DN	-2.58988	0	0		JIB04_24H_UP	2.60566	0	0
REACTOME_RESPIRATORY_ELECTRON_TRANSPORT_ATP_SYNTHESIS	-2.53991	0	0		GSKJ4_24H_UP	2.57623	0	0
DAVICIONI_RHABDOMYOSARCOMA_PAX_FOXO1_FUSION_UP	-2.45725	0	0		PODAR_RESPONSE_TO_ADAPHOSTIN_UP	2.5414	0	0
RH4_PLX1_DOWN	-2.45208	0	0		GSKJ4_6H_UP	2.47849	0	0
MOOTHA_VOXPHOS	-2.37656	0	0		HALLMARK_MTORC1_SIGNALING	2.45806	0	0
TANG_SENESCENCE_TP53_TARGETS_DN	-2.35288	0	0		GO_RESPONSE_TO_ZINC_ION	2.44969	0	0
DAVICIONI_PAX_FOXO1_SIGNATURE_IN_ARMS_UP	-2.33103	0	0		HELLER_SILENCED_BY_METHYLATION_DN	2.44731	0	0
TARGETS_OF_PAX3_FOXO1_MELTZER_CHIPSEQ	-2.33045	0	0		HIF1AN_METABOLIC	2.42404	0	0
HALLMARK_E2F_TARGETS	-2.27934	0	0		KEGG_GLYCOLYSIS_GLUCONEOGENESIS	2.39259	0	0
MANALO_HYPOXIA_DN	-2.22377	0	0		HALLMARK_REACTIVE_OXYGEN_SPECIES_PATHWAY	2.38937	0	0
BEGUM_TARGETS_OF_PAX3_FOXO1_FUSION_UP	-2.2234	0	0		LIN_REST_UP	2.35022	0	0
TRICHE_PAX3FOXO1A_TUMOR_UP	-2.21502	0	0		HALLMARK_TNFA_SIGNALING_VIA_NFKB	2.2817	0	6.06618e-05
GRYDER_PAX3FOXO1_ENHANCERS_KO_DOWN	-2.17239	0	0		HALLMARK_GLYCOLYSIS	2.24812	0	5.70934e-05
RMS_CORRELATE_WITH_FGFR4	-2.1723	0	0		NAGASHIMA_EGF_SIGNALING_UP	2.22781	0	5.39216e-05
HALLMARK_OXIDATIVE_PHOSPHORYLATION	-2.1679	0	0		GO_DIOXYGENASE_ACTIVITY	2.20845	0	5.10836e-05
PAL_PRMT5_TARGETS_UP	-2.16199	0	0		DALESSIO_TSA_RESPONSE	2.20757	0	9.66544e-05
DAVICIONI_MOLECULAR_ARMS_VS_ERMS_UP	-2.11199	0	0.000114971		MOREIRA_RESPONSE_TO_TSA_UP	2.15849	0	0.000137695
REACTOME_TRANSLATION	-2.1023	0	0.000109745		HELLER_HDAC_TARGETS_SILENCED_BY_METHYLATION_DN	2.15128	0	0.000131436
KANG_DOXORUBICIN_RESISTANCE_UP	-2.08866	0	0.000104973		MITOCHONDRIAL_STRESS_GENES	2.12401	0	0.000125722
KEGG_RIBOSOME	-2.07402	0	0.000100599		BIOCARTA_P53HYPOXIA_PATHWAY	2.09007	0	0.000160092
REACTOME_MRNA_SPLICING	-2.06865	0	9.65753e-05		HALLMARK_APOPTOSIS	2.044	0	0.000450386
WHITFIELD_CELL_CYCLE_G2_M	-2.05742	0	0.000133726		SP2509_LSD1_INHIBITOR_INDUCED	2.03862	0	0.000433063
KAMMINGA_EZH2_TARGETS	-2.05665	0	0.000128773		FORTSCHEGGER_PHF8_TARGETS_UP	2.02175	0	0.000518213
RH4_CHD4_TARGETS_DN	-1.99935	0	0.000385238		BEGUM_TARGETS_OF_PAX3_FOXO1_FUSION_DN	2.0185	0	0.000566819
BENPORATH_PROLIFERATION	-1.93331	0	0.00117241		NFE2L2.V2	2.0181	0	0.000547273
WU_APOPTOSIS_BY_CDKN1A_VIA_TP53	-1.93281	0	0.00113333		PASINI_SUZ12_TARGETS_DN	2.01672	0	0.000529031
GRYDER_PAX3FOXO1_TOP_ENHANCERS	-1.92825	0	0.0011377		HALLMARK_P53_PATHWAY	2.00986	0	0.000631001
DEPMAP_COMMON_ESSENTIALS	-1.92459	0	0.00110214		BASAKI_YBX1_TARGETS_DN	1.98969	0	0.000849731
HALLMARK_G2M_CHECKPOINT	-1.77747	0	0.00649397		NISHIBUCHI_KDM5A_DN	1.97614	0	0.000996448
WHITFIELD_CELL_CYCLE_G2	-1.76633	0	0.00706407		HALLMARK_MYOGENESIS	1.97453	0	0.000994209
DAVICIONI_TARGETS_OF_PAX_FOXO1_FUSIONS_UP	-1.73178	0	0.00873996		HALLMARK_ESTROGEN_RESPONSE_EARLY	1.97289	0	0.000993651
JIB04_24H_DOWN	-1.70274	0	0.0106914		ZHANG_TARGETS_OF_EWSR1_FLI1_FUSION	1.9691	0	0.000992898
REN_ALVEOLAR_RHABDOMYOSARCOMA_UP	-1.67339	0	0.0135104		GBM_PAUSE_CONTROLLED_GENES	1.96371	0	0.00106772
NS132_SKELETAL_MUSCLE_DOWN	-1.65527	0	0.015076		NS132_SKELETAL_MUSCLE_UP	1.96311	0	0.00103962
SHEN_SMARCA2_TARGETS_UP	-1.54827	0	0.0341228		HENDRICKS_SMARCA4_TARGETS_UP	1.95845	0	0.00108463
					KRIEG_HYPOXIA_VIA_KDM3A	1.9538	0	0.00108198
					UDAYAKUMAR_MED1_TARGETS_DN	1.94086	0	0.00128318
					KEGG_MAPK_SIGNALING_PATHWAY	1.93683	0	0.00125263
					KUROKI_KDM3B_UP	1.91868	0.00140845	0.00156957
					DAVICIONI_MOLECULAR_ARMS_VS_ERMS_DN	1.90798	0	0.00181301
					TRICHE_PAX3FOXO1A_TUMOR_DOWN	1.90265	0	0.00187389
					HELLER_HDAC_TARGETS_DN	1.89811	0	0.00191284
					RH4_PLX1_UP	1.88813	0	0.00207324
					KASLER_HDAC7_TARGETS_2_DN	1.87974	0	0.00214931
					SATO_SILENCED_BY_DEACETYLATION_IN_PANCREATIC_CANCER	1.84494	0.00299401	0.00315115
					MEK_UP.V1_UP	1.84435	0	0.00310597
					KASLER_HDAC7_TARGETS_1_DN	1.84237	0	0.0031749
					HELLER_HDAC_TARGETS_SILENCED_BY_METHYLATION_UP	1.8084	0	0.00472807
					WANG_KDM3B_UP	1.78965	0	0.00576847
					NISHIBUCHI_CHD4_DN	1.78686	0	0.00586861
					JACKSON_DNMT1_TARGETS_UP	1.78682	0.00130208	0.00576191
					NISHIBUCHI_SIN3B_DN	1.78285	0.00127226	0.00597597
					MIYAGAWA_TARGETS_OF_EWSR1_ETS_FUSIONS_DN	1.77701	0	0.0063144
					SENESE_HDAC1_AND_HDAC2_TARGETS_DN	1.7676	0	0.00691359
					SENESE_HDAC1_TARGETS_UP	1.76563	0	0.0069546
					SENESE_HDAC2_TARGETS_DN	1.75601	0.00128205	0.00759945
					AN_KDM3B_UP	1.75419	0	0.00758047
					GO_ZINC_II_ION_TRANSPORT	1.75297	0.00934579	0.00759642
					REN_ALVEOLAR_RHABDOMYOSARCOMA_DN	1.74834	0	0.00787631
					CORDENONSI_YAP_CONSERVED_SIGNATURE	1.70444	0.00549451	0.0125679
					SENESE_HDAC1_AND_HDAC2_TARGETS_UP	1.70355	0.00114679	0.0125026
					CORRELATED_0.5_WITH_TFAP2B_PAX_FOXO1_EXPRESSION_SIGNATURE_DOWN	1.7005	0.00429799	0.0127278
					DUTTA_APOPTOSIS_VIA_NFKB	1.7003	0.00596125	0.0125528
					KYNG_DNA_DAMAGE_UP	1.68835	0.00266312	0.0138241
					SENESE_HDAC3_TARGETS_UP	1.65896	0	0.0177509
					PID_P53_DOWNSTREAM_PATHWAY	1.65311	0.003663	0.018491
					BILD_HRAS_ONCOGENIC_SIGNATURE	1.65291	0.00228571	0.0182971
					PRC2_EED_UP.V1_DN	1.6448	0	0.0195544
					MIYAGAWA_TARGETS_OF_EWSR1_ETS_FUSIONS_UP	1.61688	0	0.0248038
					KINSEY_TARGETS_OF_EWSR1_FLII_FUSION_DN	1.61055	0	0.0259687
					PRC2_EZH2_UP.V1_UP	1.6068	0.00464037	0.0265751
					NISHIBUCHI_SIN3B_UP	1.60014	0.015544	0.0276641
					ROPERO_HDAC2_TARGETS	1.59916	0.00660502	0.0275602
					HALLMARK_HEDGEHOG_SIGNALING	1.59276	0.0152905	0.0285517
					HALLMARK_HEME_METABOLISM	1.59089	0.00354191	0.0285908
					MUSCLE_MASS	1.57978	0.0188953	0.0310766
					DAVICIONI_TARGETS_OF_PAX_FOXO1_FUSIONS_DN	1.57176	0.0123796	0.0331405
					WANG_RESPONSE_TO_GSK3_INHIBITOR_SB216763_DN	1.57156	0.00109529	0.0327929
					RH30_ETF100	1.57002	0.0103761	0.0328382
					RH4_BRD4_UP	1.56947	0.00242718	0.0325695
					KUROKI_KDM3B_DOWN	1.56316	0.0107527	0.0337758
					MYCN_INDUCTION_6H_UP	1.56134	0.0151133	0.033861
					MARKS_HDAC_TARGETS_UP	1.55635	0.0498489	0.0348504
					KEGG_MTOR_SIGNALING_PATHWAY	1.54724	0.0303907	0.0374498
					VANOEVELEN_MYOGENESIS_SIN3A_TARGETS	1.54565	0.00116822	0.0375556
					HELLER_HDAC_TARGETS_UP	1.54095	0	0.0385928
					P53_DN.V1_DN	1.53297	0.00359712	0.0408019
					STAMBOLSKY_TARGETS_OF_MUTATED_TP53_DN	1.5231	0.0301724	0.0435711
					DAVICIONI_RHABDOMYOSARCOMA_PAX_FOXO1_FUSION_DN	1.52038	0.0672131	0.0441976
					HALLMARK_PI3K_AKT_MTOR_SIGNALING	1.51639	0.0139594	0.0451527
					NISHIBUCHI_CHD4_UP	1.51532	0.01321	0.0451084
					BAE_BRCA1_TARGETS_UP	1.50298	0.0308725	0.0493039
					GO_REGULATION_OF_OXIDATIVE_STRESS_INDUCED_CELL_DEATH	1.50207	0.0397059	0.049162
					RIGGI_EWING_SARCOMA_PROGENITOR_DN	1.50086	0.00608273	0.0491879
					MYCN_SIRNA_IMR32-Q3MYCN-48H_UP	1.49879	0.00332594	0.0495607
					MITOCHONDRIA_BCO2_KO_DOWN	1.49632	0.0633914	0.0499641
					KESHELAVA_MULTIPLE_DRUG_RESISTANCE	1.49525	0.0300958	0.0499775
					INGA_TP53_TARGETS	1.49507	0.0607083	0.049542

## Sheet: Tab4. KUC102648N GSEA
Supplementary Table S2, Tab4. GSEA of KUC102648N 10 µM vs DMSO at 6 hrs
Down Regulated (FDR < 0.05)					Up Regulated (FDR < 0.05)
Gene Set	NES	NOM p-val	FDR q-val		Gene Set	NES	NOM p-val	FDR q-val
HALLMARK_MYC_TARGETS_V1	-2.77208	0	0		RH4_PLX1_UP	2.5512	0	0
MANALO_HYPOXIA_DN	-2.66364	0	0		HALLMARK_TNFA_SIGNALING_VIA_NFKB	2.44874	0	0
GRYDER_PAX3FOXO1_JQ1	-2.52906	0	0		DALESSIO_TSA_RESPONSE	2.26351	0	0
JIB04_24H_DOWN	-2.48399	0	0		KINSEY_TARGETS_OF_EWSR1_FLII_FUSION_DN	2.17729	0	0.000466507
RH4_PLX1_DOWN	-2.47338	0	0		PASINI_SUZ12_TARGETS_DN	2.09961	0	0.00170235
HALLMARK_MYC_TARGETS_V2	-2.46553	0	0		JIB04_4H_UP	2.08404	0	0.00189004
SP2509_LSD1_INHIBITOR_REPRESSED	-2.25467	0	0		UDAYAKUMAR_MED1_TARGETS_DN	2.07496	0	0.00162003
REACTOME_RESPIRATORY_ELECTRON_TRANSPORT_ATP_SYNTHESIS	-2.24373	0	0		MARTIN_INTERACT_WITH_HDAC	2.01111	0	0.00271238
MOOTHA_VOXPHOS	-2.2167	0	0		NAGASHIMA_EGF_SIGNALING_UP	2.00997	0.00165289	0.002411
CORRELATED_0.5_WITH_TFAP2B_PAX_FOXO1_EXPRESSION_SIGNATURE_UP	-2.19499	0	0.000122936		PODAR_RESPONSE_TO_ADAPHOSTIN_UP	2.00517	0	0.00226467
PODAR_RESPONSE_TO_ADAPHOSTIN_DN	-2.17445	0	0.000205466		SP2509_LSD1_INHIBITOR_INDUCED	2.00262	0	0.00214274
WONG_MITOCHONDRIA_GENE_MODULE	-2.1346	0	0.000270452		REN_ALVEOLAR_RHABDOMYOSARCOMA_DN	1.96112	0	0.00286999
WANG_RESPONSE_TO_GSK3_INHIBITOR_SB216763_DN	-2.07475	0	0.000563603		KEGG_MAPK_SIGNALING_PATHWAY	1.93594	0	0.00354525
KDM3B_COMBINED_LEADING_EDGE	-2.07271	0	0.000523346		PID_NFKAPPAB_CANONICAL_PATHWAY	1.91823	0.00179211	0.00412434
HALLMARK_E2F_TARGETS	-2.0243	0	0.00105097		CONCANNON_APOPTOSIS_BY_EPOXOMICIN_UP	1.90771	0	0.00462041
UDAYAKUMAR_MED1_TARGETS_UP	-1.98897	0	0.00149942		LIN_REST_UP	1.83333	0	0.00888639
NS132_SKELETAL_MUSCLE_DOWN	-1.98622	0	0.00141122		SENESE_HDAC3_TARGETS_UP	1.83002	0	0.00898953
RMS_CORRELATE_WITH_FGFR4	-1.9646	0	0.00174152		DUTTA_APOPTOSIS_VIA_NFKB	1.82651	0.003663	0.00896887
GO_NEGATIVE_REGULATION_OF_RELEASE_OF_CYTOCHROME_C_FROM_MITOCHONDRIA	-1.96027	0	0.0017021		KDM6B_EZH2_METABOLIC_SIGNATURE	1.82015	0.0017762	0.00909344
RH4_BRD4_DOWN	-1.93312	0	0.00215698		CORDENONSI_YAP_CONSERVED_SIGNATURE	1.81474	0	0.00897681
ELVIDGE_HYPOXIA_DN	-1.93225	0	0.00210224		BIOCARTA_P53HYPOXIA_PATHWAY	1.81458	0.00363636	0.00859447
ROSTY_CERVICAL_CANCER_PROLIFERATION_CLUSTER	-1.91326	0	0.00257846		PROTEIN_KINASE_ACTIVITY	1.8085	0	0.00868061
HALLMARK_OXIDATIVE_PHOSPHORYLATION	-1.89222	0	0.00287686		HALLMARK_HYPOXIA	1.80387	0	0.00889126
REN_ALVEOLAR_RHABDOMYOSARCOMA_UP	-1.86838	0	0.00366218		GBM_PAUSE_CONTROLLED_GENES	1.79207	0.00176056	0.00951884
WANG_LSD1_TARGETS_UP	-1.84872	0	0.00407358		MYCN_INDUCTION_6H_UP	1.78413	0	0.00959011
CONCANNON_APOPTOSIS_BY_EPOXOMICIN_DN	-1.82446	0	0.0049952		INGA_TP53_TARGETS	1.77072	0.00731261	0.0109401
KANG_DOXORUBICIN_RESISTANCE_UP	-1.80757	0.00236407	0.00547033		GSKJ4_24H_UP	1.75874	0.00891266	0.0114497
HELLER_HDAC_TARGETS_DN	-1.80237	0	0.00554987		REACTOME_MUSCLE_CONTRACTION	1.74873	0.00179856	0.012578
STAMBOLSKY_BOUND_BY_MUTATED_TP53	-1.77137	0.00428265	0.00738652		HALLMARK_EPITHELIAL_MESENCHYMAL_TRANSITION	1.72934	0	0.0146312
WANG_KDM3B_DN	-1.76282	0	0.00782205		EBAUER_MYOGENIC_TARGETS_OF_PAX3_FOXO1_FUSION	1.71998	0.0034662	0.0154696
HALLMARK_MTORC1_SIGNALING	-1.76094	0	0.0077846		HALLMARK_MYOGENESIS	1.71162	0	0.0162597
PAL_PRMT5_TARGETS_UP	-1.74985	0	0.00854866		HALLMARK_MITOTIC_SPINDLE	1.70698	0.0016	0.0166178
MITOCHONDRIA_PROTEOME_V1	-1.73952	0.00238095	0.00920884		MYCN_SIRNA_IMR32-Q3MYCN-48H_UP	1.70643	0	0.0162555
NEGV1	-1.73733	0	0.00927995		KYNG_DNA_DAMAGE_UP	1.69862	0.0016835	0.0169686
TRICHE_PAX3FOXO1A_TUMOR_UP	-1.71951	0	0.0104593		MUSCLE_MASS	1.67766	0.00705467	0.0193516
REACTOME_P53_INDEPENDENT_G1_S_DNA_DAMAGE_CHECKPOINT	-1.70105	0.00228833	0.0121662		EIF4E_DN	1.67742	0	0.0188411
SCIBETTA_KDM5B_TARGETS_DN	-1.67975	0.00234742	0.0146721		PRC2_EED_UP.V1_UP	1.65846	0	0.022061
PAX3FOXO1_INTERACTORS_NONNUCLEAR	-1.66714	0.014553	0.0162319		LU_EZH2_TARGETS_DN	1.64285	0	0.0245246
KEGG_PROTEASOME	-1.61606	0.0134831	0.0245026		BILD_HRAS_ONCOGENIC_SIGNATURE	1.63459	0	0.0253112
BENPORATH_PROLIFERATION	-1.60607	0	0.0258051		MAHADEVAN_IMATINIB_RESISTANCE_UP	1.63438	0.0195382	0.0246784
GRYDER_PAX3FOXO1_ENHANCERS_KO_DOWN	-1.59592	0	0.0273293		HENDRICKS_SMARCA4_TARGETS_UP	1.63114	0.0142349	0.0246064
TARGETS_OF_PAX3_FOXO1_MELTZER_CHIPSEQ	-1.59356	0.0045045	0.0270545		REACTOME_PI3K_CASCADE	1.62722	0.0110906	0.0248614
DEPMAP_NONESSENTIALS	-1.59266	0.00515464	0.026802		NS132_SKELETAL_MUSCLE_UP	1.61732	0	0.026808
EBAUER_TARGETS_OF_PAX3_FOXO1_FUSION_DN	-1.57471	0.015873	0.0306086		EGLN3_INTERACTORS	1.61109	0	0.0277688
KUNINGER_IGF1_VS_PDGFB_TARGETS_DN	-1.56243	0.0188235	0.0330368		RAS_GTPASE_ACTIVATOR_ACTIVITY	1.60926	0.0168539	0.0276605
HELLER_HDAC_TARGETS_SILENCED_BY_METHYLATION_DN	-1.5564	0	0.0337195		WANG_KDM3B_UP	1.60429	0	0.0283336
BASAKI_YBX1_TARGETS_UP	-1.55551	0	0.0331624		HELLER_HDAC_TARGETS_UP	1.59958	0	0.02879
DAVICIONI_MOLECULAR_ARMS_VS_ERMS_UP	-1.53342	0	0.0392164		DELASERNA_MYOD_TARGETS_UP	1.5823	0.0120275	0.0325284
BENPORATH_PRC2_TARGETS	-1.52187	0	0.0418087		SENESE_HDAC1_TARGETS_UP	1.56969	0	0.034784
DAVICIONI_RHABDOMYOSARCOMA_PAX_FOXO1_FUSION_UP	-1.50622	0.00656455	0.0457618		HIF1AN_INTERACTORS_BIOGRID	1.56779	0.0183028	0.0348141
WHITFIELD_CELL_CYCLE_G2	-1.49848	0	0.0478939		REACTOME_SMOOTH_MUSCLE_CONTRACTION	1.55993	0.0287253	0.0360431
GRYDER_PAX3FOXO1_TOP_ENHANCERS	-1.49246	0	0.0490821		BRD4_JMJD6_NEGATIVELY_REGULATED	1.5552	0.00509338	0.036823
P53_DN.V2_DN	-1.49223	0.0117925	0.0481992		HALLMARK_APOPTOSIS	1.55179	0.0016	0.0371837
GRYDER_PAX3FOXO1_CRC	-1.49203	0.031401	0.0473666		KIM_MYCN_AMPLIFICATION_TARGETS_DN	1.54642	0.00170358	0.0380871
MYCN_SIRNA_IMR32-Q3MYCN-48H_DOWN	-1.48452	0	0.0491395		PID_P53_DOWNSTREAM_PATHWAY	1.5422	0.00651466	0.0387697
FOSTER_KDM1A_TARGETS_UP	-1.48252	0.0129534	0.049391		MARIADASON_REGULATED_BY_HISTONE_ACETYLATION_UP	1.52666	0.0134454	0.0427752
DAVICIONI_TARGETS_OF_PAX_FOXO1_FUSIONS_DN	-1.48252	0.0260663	0.0485245		HALLMARK_HEME_METABOLISM	1.52664	0.00322061	0.0420416
KAMMINGA_EZH2_TARGETS	-1.47704	0.0329412	0.0497003		SENESE_HDAC1_AND_HDAC2_TARGETS_UP	1.52181	0.00151745	0.0430339
MITOCHONDRIAL_STRESS_GENES	-1.47508	0.025	0.0494317		HELLER_HDAC_TARGETS_SILENCED_BY_METHYLATION_UP	1.51436	0	0.0449796

## Sheet: Tab5. NP005584 GSEA
Supplementary Table S2, Tab5. GSEA of NP005584 10 µM vs DMSO at 6 hrs
Down Regulated (FDR < 0.05)					Up Regulated (FDR < 0.05)
Gene Set	NES	NOM p-val	FDR q-val		Gene Set	NES	NOM p-val	FDR q-val
RH4_PLX1_DOWN	-3.57152	0	0		RH4_PLX1_UP	3.30838	0	0
GRYDER_PAX3FOXO1_JQ1	-3.03921	0	0		HELLER_HDAC_TARGETS_SILENCED_BY_METHYLATION_UP	3.03669	0	0
PEART_HDAC_PROLIFERATION_CLUSTER_DN	-2.67045	0	0		HELLER_HDAC_TARGETS_UP	2.72257	0	0
PAX3FOXO1_INTERACTORS_NUCLEAR	-2.6032	0	0		JIB04_24H_UP	2.35822	0	0
HALLMARK_MYC_TARGETS_V1	-2.55404	0	0		JIB04_4H_UP	2.31465	0	0
GRYDER_PAX3FOXO1_CRC	-2.50441	0	0		SATO_SILENCED_BY_DEACETYLATION_IN_PANCREATIC_CANCER	2.2784	0	0
REACTOME_MRNA_SPLICING	-2.33075	0	0		NAGASHIMA_EGF_SIGNALING_UP	2.27314	0	0
HALLMARK_MYC_TARGETS_V2	-2.31702	0	0		HALLMARK_TNFA_SIGNALING_VIA_NFKB	2.25828	0	0
HALLMARK_G2M_CHECKPOINT	-2.27913	0	0		ELVIDGE_HYPOXIA_BY_DMOG_UP	2.25732	0	0
HALLMARK_E2F_TARGETS	-2.22206	0	0		HALLMARK_HYPOXIA	2.18189	0	0
HELLER_HDAC_TARGETS_SILENCED_BY_METHYLATION_DN	-2.11538	0	0.00026712		PRC2_EZH2_UP.V1_UP	2.16367	0	0
MARIADASON_REGULATED_BY_HISTONE_ACETYLATION_DN	-2.1087	0	0.00024486		GBM_PAUSE_CONTROLLED_GENES	2.11956	0	0
KEGG_SPLICEOSOME	-2.10324	0	0.000226024		LIN_REST_UP	2.11774	0	0
HELLER_HDAC_TARGETS_DN	-2.08163	0	0.00020988		KIM_RESPONSE_TO_TSA_AND_DECITABINE_UP	2.08738	0	6.63507e-05
JMJD6_INTERACTORS	-2.06019	0	0.000195888		PEART_HDAC_PROLIFERATION_CLUSTER_UP	2.08502	0	6.19273e-05
TARGETS_OF_PAX3_FOXO1_MELTZER_CHIPSEQ	-2.04597	0	0.000426994		KASLER_HDAC7_TARGETS_2_DN	2.08282	0	5.80569e-05
GO_METHYLTRANSFERASE_COMPLEX	-2.03998	0	0.000401876		DALESSIO_TSA_RESPONSE	2.08146	0	5.46418e-05
JIB04_24H_DOWN	-1.99784	0	0.000539866		HALLMARK_P53_PATHWAY	2.06633	0	5.16061e-05
PID_P53_REGULATION_PATHWAY	-1.98644	0	0.000616056		RIGGI_EWING_SARCOMA_PROGENITOR_UP	2.02416	0	0.000212633
MANALO_HYPOXIA_DN	-1.98348	0	0.000585253		MEK_UP.V1_UP	2.00755	0	0.000302524
ROSTY_CERVICAL_CANCER_PROLIFERATION_CLUSTER	-1.97062	0	0.00060077		NISHIBUCHI_KDM5A_DN	2.00086	0	0.000337241
PAL_PRMT5_TARGETS_UP	-1.9643	0	0.000573462		MYCN_SIRNA_IMR32-Q3MYCN-48H_UP	1.97803	0	0.00041492
DEPMAP_COMMON_ESSENTIALS	-1.94768	0	0.000719668		MIYAGAWA_TARGETS_OF_EWSR1_ETS_FUSIONS_UP	1.97265	0	0.00039688
SHEN_SMARCA2_TARGETS_UP	-1.9328	0	0.000892945		INGA_TP53_TARGETS	1.95924	0	0.000421176
BRD4_YAPTAZ_JQ1_DOWN	-1.9237	0	0.000925591		GSKJ4_24H_UP	1.93886	0.00185529	0.000722382
RH30_ETF100	-1.86427	0	0.00246869		HALLMARK_APOPTOSIS	1.93428	0	0.000730495
KANG_DOXORUBICIN_RESISTANCE_UP	-1.84891	0	0.00294224		AMBROSINI_FLAVOPIRIDOL_TREATMENT_TP53	1.92273	0	0.000885015
CHROMATIN_MODIFICATION	-1.81359	0.00243309	0.0042872		HALLMARK_ESTROGEN_RESPONSE_EARLY	1.91233	0	0.000890444
GSKJ4_24H_DOWN	-1.7957	0	0.00492392		CONCANNON_APOPTOSIS_BY_EPOXOMICIN_UP	1.90249	0	0.00096589
WHITFIELD_CELL_CYCLE_G2_M	-1.78648	0	0.00517615		KINSEY_TARGETS_OF_EWSR1_FLII_FUSION_DN	1.90065	0	0.000965409
CHROMATIN_REMODELING	-1.77114	0.00220751	0.00601472		SP2509_LSD1_INHIBITOR_INDUCED	1.89885	0	0.000969589
BENPORATH_PROLIFERATION	-1.73614	0	0.00801455		EBAUER_TARGETS_OF_PAX3_FOXO1_FUSION_UP	1.89828	0	0.000939289
CHROMATIN	-1.71745	0.00234742	0.00938842		MCMURRAY_TP53_HRAS_COOPERATION_RESPONSE_DN	1.8937	0	0.000940822
KAMMINGA_EZH2_TARGETS	-1.7004	0.00224719	0.0104873		PODAR_RESPONSE_TO_ADAPHOSTIN_UP	1.87277	0	0.00118131
REACTOME_REGULATION_OF_MRNA_STABILITY_BY_PROTEINS_THAT_BIND_AU_RICH_ELEMENTS	-1.69238	0	0.0107305		HELLER_SILENCED_BY_METHYLATION_DN	1.86775	0	0.00137268
KEGG_PROTEASOME	-1.67364	0.00705882	0.0125554		MARKS_HDAC_TARGETS_UP	1.86664	0	0.00136548
REACTOME_P53_INDEPENDENT_G1_S_DNA_DAMAGE_CHECKPOINT	-1.67057	0.0140187	0.0125815		NISHIBUCHI_SIN3B_DN	1.86239	0	0.00140964
EGLN3_INTERACTORS	-1.66742	0	0.0125338		GSKJ4_6H_UP	1.84106	0.0017762	0.00186048
CHROMATIN_ASSEMBLY_OR_DISASSEMBLY	-1.63203	0.0217391	0.0166941		DAVICIONI_RHABDOMYOSARCOMA_PAX_FOXO1_FUSION_DN	1.8228	0.00396825	0.00236472
MARTIN_INTERACT_WITH_HDAC	-1.61114	0.00888889	0.0194427		UDAYAKUMAR_MED1_TARGETS_DN	1.81935	0	0.00235616
WHITFIELD_CELL_CYCLE_M_G1	-1.60308	0.00251256	0.020521		HENDRICKS_SMARCA4_TARGETS_UP	1.81013	0.00173913	0.00262492
UDAYAKUMAR_MED1_TARGETS_UP	-1.60079	0.00244499	0.0204928		ZHANG_TARGETS_OF_EWSR1_FLI1_FUSION	1.80424	0	0.0028683
REN_BOUND_BY_E2F	-1.58134	0.00952381	0.0235915		HINATA_NFKB_TARGETS_KERATINOCYTE_DN	1.79376	0.00184843	0.00331626
NOUZOVA_TRETINOIN_AND_H4_ACETYLATION	-1.57334	0.00813008	0.024511		BEGUM_TARGETS_OF_PAX3_FOXO1_FUSION_DN	1.79286	0	0.00328833
NS132_SKELETAL_MUSCLE_DOWN	-1.56198	0	0.0264125		DAVICIONI_TARGETS_OF_PAX_FOXO1_FUSIONS_DN	1.78201	0.0017094	0.00370385
REACTOME_P53_DEPENDENT_G1_DNA_DAMAGE_RESPONSE	-1.5596	0.00674157	0.0263199		NISHIBUCHI_CHD4_UP	1.78059	0	0.00377949
GRYDER_PAX3FOXO1_ENHANCERS_KO_DOWN	-1.55841	0	0.0259677		HELLER_SILENCED_BY_METHYLATION_UP	1.7777	0	0.00376641
RMS_CORRELATE_WITH_FGFR4	-1.55673	0	0.0257742		HALLMARK_HEME_METABOLISM	1.77246	0	0.00375414
WHITFIELD_CELL_CYCLE_G2	-1.52591	0.00263158	0.033008		MITF_TARGETS	1.76005	0	0.00434227
MITOCHONDRIA_PROTEOME_V1	-1.51311	0.0119332	0.0353707		BILD_HRAS_ONCOGENIC_SIGNATURE	1.74478	0	0.00505452
ROME_INSULIN_TARGETS_IN_MUSCLE_UP	-1.4843	0	0.0436899		WANG_LSD1_TARGETS_DN	1.74475	0	0.00495541
REACTOME_RNA_POL_II_TRANSCRIPTION	-1.4766	0.00694444	0.0453027		GO_RESPONSE_TO_ZINC_ION	1.7446	0.00350877	0.00486011
GRYDER_PAX3FOXO1_TOP_ENHANCERS	-1.46613	0	0.04779		TRANSMEMBRANE_RECEPTOR_PROTEIN_TYROSINE_KINASE_SIGNALING_PATHWAY	1.74276	0	0.00482782
					P53_DN.V1_DN	1.73078	0.0015674	0.00576351
					NISHIBUCHI_CHD4_DN	1.7112	0	0.00695414
					RORIE_TARGETS_OF_EWSR1_FLI1_FUSION_DN	1.70697	0.00707965	0.00732384
					KIM_MYCN_AMPLIFICATION_TARGETS_UP	1.67517	0	0.00961203
					HALLMARK_MYOGENESIS	1.65963	0	0.011148
					RIGGI_EWING_SARCOMA_PROGENITOR_DN	1.6412	0	0.0129509
					KASLER_HDAC7_TARGETS_1_DN	1.64003	0.0129151	0.0129382
					TRANSMEMBRANE_RECEPTOR_PROTEIN_TYROSINE_KINASE_ACTIVITY	1.62709	0.00880282	0.0143148
					MARIADASON_REGULATED_BY_HISTONE_ACETYLATION_UP	1.60896	0.0033389	0.016784
					KEGG_RIBOSOME	1.60441	0.0033557	0.0170392
					KUNINGER_IGF1_VS_PDGFB_TARGETS_DN	1.60377	0.00540541	0.0168858
					HALLMARK_KRAS_SIGNALING_DN	1.59958	0	0.0172612
					FISCHER_DIRECT_P53_TARGETS_META_ANALYSIS	1.59384	0	0.0179808
					GO_REGULATION_OF_RESPONSE_TO_REACTIVE_OXYGEN_SPECIES	1.59363	0.0258303	0.0177449
					NISHIBUCHI_SIN3B_UP	1.58963	0	0.0182754
					REACTOME_MUSCLE_CONTRACTION	1.58939	0.00705467	0.0180702
					HALLMARK_KRAS_SIGNALING_UP	1.57463	0.0016129	0.0204457
					WANG_SMARCE1_TARGETS_UP	1.57019	0	0.0209942
					MEDINA_SMARCA4_TARGETS	1.56955	0.0160714	0.0207736
					RH4_BRD4_UP	1.56938	0.00314961	0.0205443
					NS132_SKELETAL_MUSCLE_UP	1.56805	0	0.0205828
					CORDENONSI_YAP_CONSERVED_SIGNATURE	1.56592	0.0104167	0.020668
					BAE_BRCA1_TARGETS_UP	1.5649	0.0190641	0.020567
					PASINI_SUZ12_TARGETS_DN	1.55454	0.00151976	0.0221245
					DEPMAP_NONESSENTIALS	1.5394	0.00159744	0.025133
					WANG_RESPONSE_TO_GSK3_INHIBITOR_SB216763_UP	1.53703	0	0.0254256
					REACTOME_SMOOTH_MUSCLE_CONTRACTION	1.53595	0.0373134	0.0253648
					BASAKI_YBX1_TARGETS_DN	1.5351	0	0.0252757
					KRIEG_HYPOXIA_VIA_KDM3A	1.52986	0.0243056	0.0262065
					DAVICIONI_PAX_FOXO1_SIGNATURE_IN_ARMS_DN	1.52635	0.0357782	0.0268053
					TORCHIA_TARGETS_OF_EWSR1_FLI1_FUSION_TOP20_UP	1.51652	0.0451977	0.029002
					MOREIRA_RESPONSE_TO_TSA_DN	1.5134	0.0365385	0.0294617
					KUROKI_KDM3B_UP	1.49557	0.0253165	0.0339087
					PRC2_EED_UP.V1_UP	1.49206	0.00805153	0.0345286
					HALLMARK_HEDGEHOG_SIGNALING	1.49182	0.0357143	0.034219
					HALLMARK_REACTIVE_OXYGEN_SPECIES_PATHWAY	1.47525	0.026643	0.0392322
					PRC2_EED_UP.V1_DN	1.47211	0.00624025	0.0399191
					MIYAGAWA_TARGETS_OF_EWSR1_ETS_FUSIONS_DN	1.4602	0.00328947	0.043568
					EBAUER_MYOGENIC_TARGETS_OF_PAX3_FOXO1_FUSION	1.45999	0.0291971	0.0431834

## Sheet: Tab6. KUC100517N GSEA
Supplementary Table S2, Tab6. GSEA of KUC100517N 10 µM vs DMSO at 6 hrs
Down Regulated (FDR < 0.05)						Up Regulated (FDR < 0.05)
Gene Set	NES	NOM p-val	FDR q-val			Gene Set	NES	NOM p-val	FDR q-val
JIB04_24H_DOWN	-2.30915	0	0			HALLMARK_TNFA_SIGNALING_VIA_NFKB	2.93177	0	0
KDM3B_COMBINED_LEADING_EDGE	-2.15709	0	0.000798268			NAGASHIMA_EGF_SIGNALING_UP	2.57728	0	0
SP2509_LSD1_INHIBITOR_REPRESSED	-2.04835	0	0.00191666			PASINI_SUZ12_TARGETS_DN	2.53547	0	0
UDAYAKUMAR_MED1_TARGETS_UP	-2.04529	0	0.00143749			EBAUER_MYOGENIC_TARGETS_OF_PAX3_FOXO1_FUSION	2.49456	0	0
REN_ALVEOLAR_RHABDOMYOSARCOMA_UP	-2.00465	0	0.00183769			MYCN_INDUCTION_6H_UP	2.39547	0	0
RMS_CORRELATE_WITH_FGFR4	-1.98409	0	0.00196129			REACTOME_MUSCLE_CONTRACTION	2.39241	0	0
MYCN_CORRELATED_GENES_IN_PEDTUMOR_DB_UP	-1.93936	0	0.00312309			UDAYAKUMAR_MED1_TARGETS_DN	2.38522	0	0
JACKSON_DNMT1_TARGETS_DN	-1.93915	0.00222717	0.0027327			REN_ALVEOLAR_RHABDOMYOSARCOMA_DN	2.37826	0	0
NS132_SKELETAL_MUSCLE_DOWN	-1.91149	0	0.00356336			KYNG_DNA_DAMAGE_UP	2.36969	0	0
CORRELATED_0.5_WITH_TFAP2B_PAX_FOXO1_EXPRESSION_SIGNATURE_UP	-1.90342	0	0.00354833			CORDENONSI_YAP_CONSERVED_SIGNATURE	2.34438	0	0
GSKJ4_24H_DOWN	-1.89041	0.00207039	0.0039215			CONCANNON_APOPTOSIS_BY_EPOXOMICIN_UP	2.32159	0	0
PODAR_RESPONSE_TO_ADAPHOSTIN_DN	-1.87942	0	0.00400254			NS132_SKELETAL_MUSCLE_UP	2.31742	0	0
MANALO_HYPOXIA_DN	-1.87139	0	0.00442015			HALLMARK_HYPOXIA	2.29276	0	0
TARGETS_OF_PAX3_FOXO1_MELTZER_CHIPSEQ	-1.86456	0	0.0042299			DALESSIO_TSA_RESPONSE	2.28535	0	0
BENPORATH_PRC2_TARGETS	-1.80984	0	0.00782696			GBM_PAUSE_CONTROLLED_GENES	2.28189	0	0
ROSTY_CERVICAL_CANCER_PROLIFERATION_CLUSTER	-1.79212	0	0.00928154			SP2509_LSD1_INHIBITOR_INDUCED	2.25402	0	0
HALLMARK_WNT_BETA_CATENIN_SIGNALING	-1.76141	0.00401606	0.012691			DUTTA_APOPTOSIS_VIA_NFKB	2.22662	0	0
CONCANNON_APOPTOSIS_BY_EPOXOMICIN_DN	-1.75525	0	0.0128416			REACTOME_SMOOTH_MUSCLE_CONTRACTION	2.20826	0	0
MITOCHONDRIA_BCO2_KO_DOWN	-1.70225	0.0125523	0.0200875			HALLMARK_EPITHELIAL_MESENCHYMAL_TRANSITION	2.20315	0	0
GRYDER_PAX3FOXO1_JQ1	-1.68205	0	0.0227858			BIOCARTA_P53HYPOXIA_PATHWAY	2.198	0	0
HALLMARK_MYC_TARGETS_V2	-1.64499	0.00843882	0.0302417			EBAUER_TARGETS_OF_PAX3_FOXO1_FUSION_UP	2.17284	0	0
RH4_PLX1_UP	-1.59529	0	0.045337			PODAR_RESPONSE_TO_ADAPHOSTIN_UP	2.15763	0	5.08338e-05
						MCMURRAY_TP53_HRAS_COOPERATION_RESPONSE_UP	2.10597	0	0.000289421
						HALLMARK_MYOGENESIS	2.09357	0	0.000277362
						SENESE_HDAC1_TARGETS_UP	2.0785	0	0.000310738
						INGA_TP53_TARGETS	2.07756	0	0.000298787
						KEGG_MAPK_SIGNALING_PATHWAY	2.06913	0	0.000287721
						HALLMARK_APOPTOSIS	2.06836	0	0.000277445
						JIB04_24H_UP	2.03232	0	0.000497559
						KEGG_PROTEASOME	2.02358	0	0.000558096
						HENDRICKS_SMARCA4_TARGETS_UP	2.0047	0	0.000720206
						SENESE_HDAC1_AND_HDAC2_TARGETS_UP	1.99614	0	0.000834661
						KINSEY_TARGETS_OF_EWSR1_FLII_FUSION_DN	1.99035	0	0.000913099
						KEGG_RIBOSOME	1.97286	0	0.00101934
						SENESE_HDAC3_TARGETS_UP	1.964	0	0.00108862
						NISHIBUCHI_SIN3B_DN	1.95839	0	0.00105838
						NOUZOVA_TRETINOIN_AND_H4_ACETYLATION	1.93284	0	0.0014819
						PID_NFKAPPAB_CANONICAL_PATHWAY	1.92178	0	0.00158551
						MAHADEVAN_IMATINIB_RESISTANCE_UP	1.89273	0.0020202	0.00236695
						RH4_PLX1_DOWN	1.88588	0	0.00244652
						NISHIBUCHI_CHD4_DN	1.88427	0	0.00244111
						HALLMARK_KRAS_SIGNALING_UP	1.84552	0	0.00348043
						SENESE_HDAC2_TARGETS_DN	1.8345	0.00183824	0.00393426
						JACKSON_DNMT1_TARGETS_UP	1.83239	0	0.00391977
						KUNINGER_IGF1_VS_PDGFB_TARGETS_UP	1.82293	0	0.00450689
						REACTOME_P53_INDEPENDENT_G1_S_DNA_DAMAGE_CHECKPOINT	1.80493	0	0.00559652
						HELLER_SILENCED_BY_METHYLATION_UP	1.78249	0	0.00689458
						ELVIDGE_HYPOXIA_BY_DMOG_UP	1.77302	0	0.00760715
						P53_DN.V1_UP	1.75161	0.00184843	0.00919369
						KRIEG_HYPOXIA_VIA_KDM3A	1.75103	0	0.00910278
						KLEIN_KDM5B_UP	1.74025	0	0.00977339
						BILD_HRAS_ONCOGENIC_SIGNATURE	1.73462	0	0.00999583
						SENESE_HDAC1_AND_HDAC2_TARGETS_DN	1.71628	0	0.0112658
						BEGUM_TARGETS_OF_PAX3_FOXO1_FUSION_DN	1.70449	0.00393701	0.012481
						REACTOME_P53_DEPENDENT_G1_DNA_DAMAGE_RESPONSE	1.69039	0.0165441	0.0138978
						REACTOME_TRANSLATION	1.68889	0	0.013829
						DAVICIONI_TARGETS_OF_PAX_FOXO1_FUSIONS_UP	1.68887	0	0.0135864
						HSIAO_HOUSEKEEPING_GENES	1.68825	0	0.0134501
						SHEN_SMARCA2_TARGETS_UP	1.65708	0	0.0168222
						JIB04_4H_UP	1.65104	0.00182815	0.0177421
						DEPMAP_COMMON_ESSENTIALS	1.63992	0	0.0190552
						PID_NFKAPPAB_ATYPICAL_PATHWAY	1.63333	0.028169	0.0199003
						MARTIN_INTERACT_WITH_HDAC	1.62664	0.00590551	0.0208562
						ROME_INSULIN_TARGETS_IN_MUSCLE_UP	1.61613	0	0.0224213
						SIRNA_SCREEN_RH30<0.01_RD<0.01_HELMAN	1.59096	0.00732601	0.0269287
						BIOCARTA_P53_PATHWAY	1.58747	0.0346154	0.0271582
						MUSCLE_MASS	1.58444	0.0199637	0.0273921
						HELLER_SILENCED_BY_METHYLATION_DN	1.58145	0	0.0275486
						KIM_RESPONSE_TO_TSA_AND_DECITABINE_UP	1.5788	0.00191571	0.027751
						PID_P53_DOWNSTREAM_PATHWAY	1.5682	0.00749064	0.0300409
						MIYAGAWA_TARGETS_OF_EWSR1_ETS_FUSIONS_DN	1.56379	0	0.030935
						LU_EZH2_TARGETS_DN	1.55585	0	0.0326783
						TORCHIA_TARGETS_OF_EWSR1_FLI1_FUSION_TOP20_UP	1.55411	0.0406977	0.032617
						NISHIBUCHI_KDM5A_DN	1.54334	0.00380952	0.0349567
						KUROKI_KDM3B_DOWN	1.5342	0.0137255	0.0370103
						RORIE_TARGETS_OF_EWSR1_FLI1_FUSION_UP	1.53345	0.0318091	0.0366861
						SIRNA_SCREEN_RD_HELMAN_TOP_300	1.51648	0	0.041475
						REACTOME_REGULATION_OF_MRNA_STABILITY_BY_PROTEINS_THAT_BIND_AU_RICH_ELEMENTS	1.51426	0.0136986	0.0417628
						DELASERNA_MYOD_TARGETS_UP	1.49784	0.00978474	0.0466595

## Sheet: Tab7. 78902794023 GSEA
Supplementary Table S2, Tab7. GSEA of 78902794023 10 µM vs DMSO at 6 hrs
Down Regulated (FDR < 0.05)						Up Regulated (FDR < 0.05)
Gene Set	NES	NOM p-val	FDR q-val			Gene Set	NES	NOM p-val	FDR q-val
SENESE_HDAC1_TARGETS_UP	-2.59412	0	0			KEGG_RIBOSOME	2.6384	0	0
SENESE_HDAC3_TARGETS_UP	-2.45195	0	0			PODAR_RESPONSE_TO_ADAPHOSTIN_DN	2.62783	0	0
DE_YY1_TARGETS_DN	-2.31576	0	0			HALLMARK_MTORC1_SIGNALING	2.44637	0	0
KONDO_EZH2_TARGETS	-2.2069	0	0			SP2509_LSD1_INHIBITOR_REPRESSED	2.13399	0	0.0004657
HALLMARK_TGF_BETA_SIGNALING	-2.14866	0	0			REACTOME_TRANSLATION	2.04776	0	0.00273154
BEGUM_TARGETS_OF_PAX3_FOXO1_FUSION_UP	-2.13909	0	0			SENESE_HDAC1_AND_HDAC2_TARGETS_DN	1.92332	0	0.00907944
WANG_SMARCE1_TARGETS_UP	-2.06939	0	0.000433649			HSIAO_HOUSEKEEPING_GENES	1.85119	0	0.0148324
KANG_DOXORUBICIN_RESISTANCE_DN	-2.05384	0	0.00076347			WANG_RESPONSE_TO_GSK3_INHIBITOR_SB216763_DN	1.8368	0	0.0150404
MIYAGAWA_TARGETS_OF_EWSR1_ETS_FUSIONS_DN	-2.03936	0	0.000799157			REACTOME_RESPIRATORY_ELECTRON_TRANSPORT_ATP_SYNTHESIS	1.803	0	0.019149
MYCN_INDUCTION_6H_UP	-2.0118	0	0.00143385			HALLMARK_MYOGENESIS	1.77179	0	0.0241925
DUTTA_APOPTOSIS_VIA_NFKB	-1.96312	0	0.00255318			LU_EZH2_TARGETS_UP	1.77004	0	0.0223314
SENESE_HDAC2_TARGETS_UP	-1.9597	0	0.00234042			HALLMARK_ANDROGEN_RESPONSE	1.76121	0	0.0220457
SHEN_SMARCA2_TARGETS_UP	-1.95133	0	0.00231822			RH4_PLX1_UP	1.75837	0	0.0212713
PASINI_SUZ12_TARGETS_DN	-1.93776	0	0.00260132			MOOTHA_VOXPHOS	1.73921	0.00252525	0.0230982
SENESE_HDAC1_AND_HDAC2_TARGETS_UP	-1.92273	0	0.00321642			JACKSON_DNMT1_TARGETS_DN	1.68184	0.0176211	0.0364003
BRD4_JMJD6_NEGATIVELY_REGULATED	-1.92043	0	0.00320992			NISHIBUCHI_KDM5A_UP	1.64847	0	0.0459608
KUROKI_KDM3B_DOWN	-1.89039	0	0.00448669			PAX3FOXO1_INTERACTORS_NONNUCLEAR	1.64672	0.014862	0.0438474
LU_EZH2_TARGETS_DN	-1.84698	0	0.00710158
BAE_BRCA1_TARGETS_DN	-1.84141	0.00361011	0.00695412
TRANSMEMBRANE_RECEPTOR_PROTEIN_KINASE_ACTIVITY	-1.82134	0	0.00794563
UDAYAKUMAR_MED1_TARGETS_UP	-1.77737	0	0.0119682
BEGUM_TARGETS_OF_PAX3_FOXO1_FUSION_DN	-1.76576	0	0.0125879
EIF4E_DN	-1.76161	0	0.0126406
HALLMARK_KRAS_SIGNALING_UP	-1.75407	0	0.013008
PAL_PRMT5_TARGETS_DN	-1.7431	0.00545455	0.0144324
TRANSMEMBRANE_RECEPTOR_PROTEIN_TYROSINE_KINASE_ACTIVITY	-1.74049	0	0.0141933
HALLMARK_EPITHELIAL_MESENCHYMAL_TRANSITION	-1.73252	0	0.0145684
CORDENONSI_YAP_CONSERVED_SIGNATURE	-1.71423	0.0034965	0.0166163
GYORFFY_DOXORUBICIN_RESISTANCE	-1.68847	0.00701754	0.0201971
PRC2_EZH2_UP.V1_UP	-1.67881	0	0.0215281
EGLN3_INTERACTORS	-1.66218	0	0.0240793
PID_NFKAPPAB_CANONICAL_PATHWAY	-1.65536	0.0180832	0.0250243
MYCN_SIRNA_IMR32-Q3MYCN-48H_UP	-1.65222	0	0.0250019
HIF1AN_INTERACTORS_BIOGRID	-1.64989	0.00490196	0.0247296
DAVICIONI_TARGETS_OF_PAX_FOXO1_FUSIONS_DN	-1.64736	0.00505902	0.0245663

## Sheet: Tab8. 78800610218 GSEA
Supplementary Table S2, Tab8. GSEA of 78800610218 10 µM vs DMSO at 6 hrs
Down Regulated (FDR < 0.05)						Up Regulated (FDR < 0.05)
Gene Set	NES	NOM p-val	FDR q-val			Gene Set	NES	NOM p-val	FDR q-val
HALLMARK_MYC_TARGETS_V1	-3.29128	0	0			HALLMARK_MITOTIC_SPINDLE	2.13889	0	0.00211231
HSIAO_HOUSEKEEPING_GENES	-3.23922	0	0			MYCN_INDUCTION_6H_DOWN	1.79215	0	0.0676295
HALLMARK_OXIDATIVE_PHOSPHORYLATION	-3.22256	0	0			WANG_KDM3B_UP	1.77521	0	0.055514
REACTOME_RESPIRATORY_ELECTRON_TRANSPORT_ATP_SYNTHESIS	-3.2028	0	0			GRYDER_PAX3FOXO1_JQ1	1.77398	0.00136986	0.0423205
REACTOME_TRANSLATION	-3.12463	0	0			PODAR_RESPONSE_TO_ADAPHOSTIN_DN	1.75481	0.00323625	0.0435126
KEGG_RIBOSOME	-3.05262	0	0
WONG_MITOCHONDRIA_GENE_MODULE	-3.0369	0	0
MOOTHA_VOXPHOS	-2.97022	0	0
DEPMAP_COMMON_ESSENTIALS	-2.73724	0	0
REACTOME_P53_INDEPENDENT_G1_S_DNA_DAMAGE_CHECKPOINT	-2.52829	0	0
REACTOME_REGULATION_OF_MRNA_STABILITY_BY_PROTEINS_THAT_BIND_AU_RICH_ELEMENTS	-2.49509	0	0
REN_ALVEOLAR_RHABDOMYOSARCOMA_DN	-2.49103	0	0
MITOCHONDRIA_PROTEOME_V1	-2.4419	0	0
KEGG_PROTEASOME	-2.39458	0	0
ELVIDGE_HYPOXIA_DN	-2.32462	0	0
REACTOME_P53_DEPENDENT_G1_DNA_DAMAGE_RESPONSE	-2.31615	0	0
CORDENONSI_YAP_CONSERVED_SIGNATURE	-2.21963	0	0.00015
MYCN_INDUCTION_6H_UP	-2.18936	0	0.000141667
MANALO_HYPOXIA_DN	-2.18532	0	0.000134211
JMJD6_INTERACTORS	-2.16483	0	0.000207187
ROME_INSULIN_TARGETS_IN_MUSCLE_UP	-2.15057	0	0.000197321
HALLMARK_MYC_TARGETS_V2	-2.14812	0	0.000188352
DAVICIONI_PAX_FOXO1_SIGNATURE_IN_ARMS_DN	-2.10954	0	0.000455241
GO_NEGATIVE_REGULATION_OF_RELEASE_OF_CYTOCHROME_C_FROM_MITOCHONDRIA	-2.09417	0	0.000436273
BASAKI_YBX1_TARGETS_UP	-2.07077	0	0.000563002
HALLMARK_TNFA_SIGNALING_VIA_NFKB	-2.06691	0	0.000625414
NAGASHIMA_EGF_SIGNALING_UP	-2.03637	0	0.000981305
BRD4_YAPTAZ_JQ1_DOWN	-2.02202	0	0.001097
HALLMARK_EPITHELIAL_MESENCHYMAL_TRANSITION	-2.00937	0	0.00105918
REACTOME_POST_TRANSLATIONAL_PROTEIN_MODIFICATION	-2.00622	0	0.00102387
MCMURRAY_TP53_HRAS_COOPERATION_RESPONSE_UP	-1.98719	0	0.00129987
KEGG_GLYCOLYSIS_GLUCONEOGENESIS	-1.94874	0	0.00243894
HIF1AN_METABOLIC	-1.93461	0	0.00267135
KEGG_SPLICEOSOME	-1.9237	0	0.0027689
MOREIRA_RESPONSE_TO_TSA_UP	-1.90645	0	0.00315476
PAL_PRMT5_TARGETS_UP	-1.90619	0	0.00306713
REACTOME_SMOOTH_MUSCLE_CONTRACTION	-1.90071	0	0.00325099
PASINI_SUZ12_TARGETS_DN	-1.88959	0	0.00343487
KYNG_DNA_DAMAGE_UP	-1.87635	0	0.0043057
PAL_PRMT5_TARGETS_DN	-1.86677	0.00274725	0.00444662
HALLMARK_UNFOLDED_PROTEIN_RESPONSE	-1.80742	0	0.00748498
HALLMARK_GLYCOLYSIS	-1.80551	0	0.00739677
BEGUM_TARGETS_OF_PAX3_FOXO1_FUSION_DN	-1.76976	0	0.00997572
HALLMARK_HYPOXIA	-1.73556	0	0.0121253
HALLMARK_KRAS_SIGNALING_UP	-1.72684	0	0.0128352
WANG_SMARCE1_TARGETS_DN	-1.7249	0	0.0128188
REACTOME_MRNA_SPLICING	-1.72191	0	0.0127613
DAVICIONI_RHABDOMYOSARCOMA_PAX_FOXO1_FUSION_DN	-1.71116	0.0177215	0.0135163
BENPORATH_PROLIFERATION	-1.65388	0	0.0200443
TRICHE_PAX3FOXO1A_TUMOR_DOWN	-1.65243	0	0.0198501
JMJD8_INTERACTORS	-1.63587	0.0119048	0.0218078
GBM_PAUSE_CONTROLLED_GENES	-1.63503	0.00306748	0.0214277
UDAYAKUMAR_MED1_TARGETS_UP	-1.62101	0	0.0237192
EIF4E_UP	-1.58752	0	0.0298522
HALLMARK_REACTIVE_OXYGEN_SPECIES_PATHWAY	-1.57788	0.0228758	0.0318539
MYCN_SIRNA_IMR32-Q3MYCN-48H_DOWN	-1.57065	0	0.0330061
KAYO_AGING_MUSCLE_DN	-1.55846	0	0.0352905
JIB04_24H_UP	-1.54785	0.0176056	0.0375477
DAVICIONI_TARGETS_OF_PAX_FOXO1_FUSIONS_DN	-1.52413	0.0320285	0.0434795

## Sheet: Tab9. IMMLG5770 GSEA
Supplementary Table S2, Tab9. GSEA of IMMLG5770 10 µM vs DMSO at 6 hrs
Down Regulated (FDR < 0.05)						Up Regulated (FDR < 0.05)
Gene Set	NES	NOM p-val	FDR q-val			Gene Set	NES	NOM p-val	FDR q-val
KEGG_RIBOSOME	-3.42248	0	0			HALLMARK_MITOTIC_SPINDLE	2.2365	0	0
REACTOME_TRANSLATION	-3.2471	0	0			PAX3FOXO1_INTERACTORS_NUCLEAR	1.95472	0	0.00713256
HSIAO_HOUSEKEEPING_GENES	-3.08994	0	0			EIF4E_DN	1.875	0	0.0169771
REACTOME_RESPIRATORY_ELECTRON_TRANSPORT_ATP_SYNTHESIS	-3.0771	0	0			BRD4_JMJD6_NEGATIVELY_REGULATED	1.82987	0	0.023019
MOOTHA_VOXPHOS	-2.9999	0	0			GRYDER_PAX3FOXO1_JQ1	1.77482	0	0.0353648
HALLMARK_OXIDATIVE_PHOSPHORYLATION	-2.99202	0	0			CHROMATIN_REMODELING	1.64574	0.0183333	0.0489179
WONG_MITOCHONDRIA_GENE_MODULE	-2.83866	0	0
DEPMAP_COMMON_ESSENTIALS	-2.4525	0	0
HALLMARK_MYC_TARGETS_V1	-2.43831	0	0
MITOCHONDRIA_PROTEOME_V1	-2.33563	0	0.000157831
REACTOME_P53_INDEPENDENT_G1_S_DNA_DAMAGE_CHECKPOINT	-2.25598	0	0.000278814
LU_EZH2_TARGETS_UP	-2.22037	0	0.00050695
KEGG_PROTEASOME	-2.22007	0	0.000467954
HIF1AN_METABOLIC	-2.10307	0	0.00121587
REACTOME_P53_DEPENDENT_G1_DNA_DAMAGE_RESPONSE	-2.01965	0	0.002726
REACTOME_REGULATION_OF_MRNA_STABILITY_BY_PROTEINS_THAT_BIND_AU_RICH_ELEMENTS	-1.99555	0	0.00369306
KEGG_GLYCOLYSIS_GLUCONEOGENESIS	-1.99171	0	0.00357095
REN_ALVEOLAR_RHABDOMYOSARCOMA_DN	-1.93604	0	0.00504731
MOREIRA_RESPONSE_TO_TSA_UP	-1.93459	0	0.00478166
HALLMARK_UNFOLDED_PROTEIN_RESPONSE	-1.91468	0	0.00527393
GSKJ4_6H_UP	-1.85179	0.003003	0.0082261
GO_REGULATION_OF_OXIDATIVE_STRESS_INDUCED_CELL_DEATH	-1.81161	0	0.0106623
JMJD6_INTERACTORS	-1.72812	0	0.0204903
MITOCHONDRIAL_STRESS_GENES	-1.66587	0.00321543	0.0311139
GO_NEGATIVE_REGULATION_OF_RELEASE_OF_CYTOCHROME_C_FROM_MITOCHONDRIA	-1.65685	0.017199	0.0324664
JIB04_24H_UP	-1.63581	0.0123457	0.0372214
ELVIDGE_HYPOXIA_DN	-1.61571	0	0.0422291
